# Supplementary material
Source: HighWire-hosted journal article supplement (https://ard.bmj.com/content/78/8/1079)
Supplement: inline-supplementary-material-7 [file inline-supplementary-material-7.xlsx]

## Sheet: Supplementary table 3
TABLE S3
geneID	Name	log2FoldChange	pvalue	padj
ENSG00000134321	RSAD2	0.955605	3.83819e-18	3.98366e-14
ENSG00000137959	IFI44L	0.958531	3.77306e-18	3.98366e-14
ENSG00000225630	MTND2P28	-0.926705	2.2971e-17	1.58944e-13
ENSG00000137965	IFI44	0.936048	9.09448e-17	4.71958e-13
ENSG00000134326	CMPK2	0.90369	1.51929e-15	6.30747e-12
ENSG00000187608	ISG15	0.893017	2.71724e-15	9.40073e-12
ENSG00000165949	IFI27	0.786119	3.05033e-14	9.04555e-11
ENSG00000225964	AC017076.5	0.841681	6.51504e-14	1.69049e-10
ENSG00000111331	OAS3	0.840088	1.24308e-13	2.8671e-10
ENSG00000214872	SMTNL1	0.839743	1.43218e-13	2.97293e-10
ENSG00000152766	ANKRD22	0.825882	2.63139e-13	4.96567e-10
ENSG00000119917	IFIT3	0.819707	4.42352e-13	6.57962e-10
ENSG00000168062	BATF2	0.814893	4.12329e-13	6.57962e-10
ENSG00000185745	IFIT1	0.81441	4.75452e-13	6.57962e-10
ENSG00000225492	GBP1P1	0.80657	4.63664e-13	6.57962e-10
ENSG00000078081	LAMP3	0.786818	3.17105e-12	4.11404e-09
ENSG00000133106	EPSTI1	0.771114	1.00166e-11	1.22308e-08
ENSG00000115155	OTOF	0.696142	1.66439e-11	1.81839e-08
ENSG00000126709	IFI6	0.764707	1.65593e-11	1.81839e-08
ENSG00000079385	CEACAM1	0.672433	2.52657e-11	2.49746e-08
ENSG00000184979	USP18	0.752525	2.49785e-11	2.49746e-08
ENSG00000122420	PTGFR	0.701577	2.86959e-11	2.70759e-08
ENSG00000134851	TMEM165	0.430778	3.24489e-11	2.92859e-08
ENSG00000088827	SIGLEC1	0.721704	5.68967e-11	4.76514e-08
ENSG00000149131	SERPING1	0.742166	5.73892e-11	4.76514e-08
ENSG00000138646	HERC5	0.73374	1.02615e-10	8.19264e-08
ENSG00000010030	ETV7	0.729643	1.30636e-10	1.00435e-07
ENSG00000224891	AC007899.3	0.717503	1.63764e-10	1.21407e-07
ENSG00000160932	LY6E	0.71494	3.02456e-10	2.16496e-07
ENSG00000188313	PLSCR1	0.63371	3.20102e-10	2.2149e-07
ENSG00000089127	OAS1	0.710553	3.39812e-10	2.27542e-07
ENSG00000238025	ZDHHC4P1	0.669119	4.26094e-10	2.76402e-07
ENSG00000100448	CTSG	0.677859	4.79256e-10	2.926e-07
ENSG00000120217	CD274	0.644764	4.65874e-10	2.926e-07
ENSG00000119922	IFIT2	0.673541	5.08976e-10	3.01867e-07
ENSG00000179869	ABCA13	0.682527	5.66127e-10	3.26435e-07
ENSG00000233029	RP11-439A17.9	0.653852	7.23251e-10	4.05764e-07
ENSG00000118113	MMP8	0.66236	8.88893e-10	4.8557e-07
ENSG00000105967	TFEC	0.577621	1.15307e-09	6.13728e-07
ENSG00000121236	TRIM6	0.68216	1.44604e-09	7.50422e-07
ENSG00000179044	EXOC3L1	0.683576	1.59839e-09	8.09255e-07
ENSG00000164821	DEFA4	0.645843	2.00426e-09	9.90581e-07
ENSG00000136514	RTP4	0.660613	2.17768e-09	1.05126e-06
ENSG00000132274	TRIM22	0.582774	2.51754e-09	1.18771e-06
ENSG00000169397	RNASE3	0.663074	2.58718e-09	1.19344e-06
ENSG00000108387	2004-09-01	0.670614	2.67575e-09	1.20746e-06
ENSG00000172232	AZU1	0.662613	3.13409e-09	1.3842e-06
ENSG00000197272	IL27	0.591496	3.45438e-09	1.49388e-06
ENSG00000132530	XAF1	0.65702	4.19203e-09	1.76359e-06
ENSG00000152778	IFIT5	0.622898	4.24797e-09	1.76359e-06
ENSG00000138496	PARP9	0.519457	4.99924e-09	2.03479e-06
ENSG00000123610	TNFAIP6	0.618191	5.5555e-09	2.17587e-06
ENSG00000205837	LINC00487	0.60714	5.52701e-09	2.17587e-06
ENSG00000197561	ELANE	0.637196	5.6907e-09	2.18755e-06
ENSG00000225886	RP11-288L9.4	0.641489	5.8226e-09	2.19756e-06
ENSG00000257017	HP	0.660556	6.00211e-09	2.22485e-06
ENSG00000261211	RP1-80N2.3	0.636647	7.06753e-09	2.57382e-06
ENSG00000112053	SLC26A8	0.549707	7.55647e-09	2.70444e-06
ENSG00000173391	OLR1	0.620146	8.79071e-09	3.09284e-06
ENSG00000079393	DUSP13	0.649194	9.1223e-09	3.15601e-06
ENSG00000196141	SPATS2L	0.650399	1.00376e-08	3.41573e-06
ENSG00000196415	PRTN3	0.609068	1.16468e-08	3.83752e-06
ENSG00000198019	FCGR1B	0.578006	1.14939e-08	3.83752e-06
ENSG00000267538	AC004799.3	0.626017	1.29756e-08	4.20854e-06
ENSG00000169245	CXCL10	0.636158	2.01141e-08	6.42352e-06
ENSG00000086548	CEACAM6	0.6058	2.57083e-08	8.08565e-06
ENSG00000010610	CD4	-0.437759	2.69564e-08	8.21148e-06
ENSG00000135114	OASL	0.62588	2.68814e-08	8.21148e-06
ENSG00000225963	AC009950.2	0.502381	2.72951e-08	8.21148e-06
ENSG00000149516	MS4A3	0.622821	2.83621e-08	8.41056e-06
ENSG00000188157	AGRN	0.623539	2.97504e-08	8.698e-06
ENSG00000055332	EIF2AK2	0.58423	3.15794e-08	8.85846e-06
ENSG00000117228	GBP1	0.584601	3.132e-08	8.85846e-06
ENSG00000169385	RNASE2	0.620952	3.15293e-08	8.85846e-06
ENSG00000002549	LAP3	0.569563	3.27114e-08	9.05364e-06
ENSG00000183019	C19orf59	0.546038	3.68459e-08	1.00638e-05
ENSG00000157601	MX1	0.620195	4.73147e-08	1.25395e-05
ENSG00000228318	AP001610.5	0.620159	4.71048e-08	1.25395e-05
ENSG00000229677	RP11-383F6.1	0.613774	4.77223e-08	1.25395e-05
ENSG00000157554	ERG	0.59899	6.15368e-08	1.59673e-05
ENSG00000096968	JAK2	0.402265	6.73801e-08	1.72676e-05
ENSG00000221963	APOL6	0.501513	7.59536e-08	1.92274e-05
ENSG00000099985	OSM	0.504964	8.10463e-08	2.02694e-05
ENSG00000087116	ADAMTS2	0.533182	8.34385e-08	2.06192e-05
ENSG00000109107	ALDOC	-0.356494	1.01274e-07	2.47324e-05
ENSG00000101425	BPI	0.598059	1.05332e-07	2.54242e-05
ENSG00000139572	GPR84	0.593565	1.08756e-07	2.5949e-05
ENSG00000121380	BCL2L14	0.59318	1.12544e-07	2.65477e-05
ENSG00000177409	SAMD9L	0.533256	1.13947e-07	2.65765e-05
ENSG00000137628	DDX60	0.586397	1.19564e-07	2.75768e-05
ENSG00000148346	LCN2	0.584575	1.30179e-07	2.96951e-05
ENSG00000186081	KRT5	-0.593003	1.36695e-07	3.08425e-05
ENSG00000108821	COL1A1	-0.44593	1.62101e-07	3.47163e-05
ENSG00000134827	TCN1	0.594803	1.5871e-07	3.47163e-05
ENSG00000152022	LIX1L	-0.222556	1.59271e-07	3.47163e-05
ENSG00000164047	CAMP	0.59274	1.61193e-07	3.47163e-05
ENSG00000168710	AHCYL1	-0.248545	1.63898e-07	3.47163e-05
ENSG00000213588	ZBTB9	-0.268799	1.62606e-07	3.47163e-05
ENSG00000150337	FCGR1A	0.576282	1.71767e-07	3.58261e-05
ENSG00000205413	SAMD9	0.494139	1.72589e-07	3.58261e-05
ENSG00000139641	ESYT1	-0.334653	1.74392e-07	3.58418e-05
ENSG00000186583	SPATC1	0.581436	1.76318e-07	3.58825e-05
ENSG00000115414	FN1	-0.5543	1.88592e-07	3.80078e-05
ENSG00000124469	CEACAM8	0.56363	2.28461e-07	4.55999e-05
ENSG00000213500	LAP3P2	0.568035	2.90859e-07	5.75014e-05
ENSG00000135372	NAT10	-0.307985	3.28226e-07	6.36758e-05
ENSG00000185507	IRF7	0.542033	3.27755e-07	6.36758e-05
ENSG00000128383	APOBEC3A	0.414671	3.43419e-07	6.54008e-05
ENSG00000224940	PRRT4	0.577332	3.41432e-07	6.54008e-05
ENSG00000121858	TNFSF10	0.39545	3.6715e-07	6.86603e-05
ENSG00000185338	SOCS1	0.527446	3.65354e-07	6.86603e-05
ENSG00000117226	GBP3	0.488237	3.85681e-07	7.14819e-05
ENSG00000181381	DDX60L	0.45785	3.9103e-07	7.18318e-05
ENSG00000217275	RP1-34B20.4	0.574396	4.11759e-07	7.49762e-05
ENSG00000005381	MPO	0.572941	4.23882e-07	7.65126e-05
ENSG00000196358	NTNG2	0.517567	4.72656e-07	8.45809e-05
ENSG00000119689	DLST	-0.122938	4.81121e-07	8.53599e-05
ENSG00000173193	PARP14	0.501235	5.20169e-07	9.15057e-05
ENSG00000257315	ZBED6	0.469705	5.26101e-07	9.17714e-05
ENSG00000175643	RMI2	0.542173	5.39543e-07	9.31051e-05
ENSG00000177294	FBXO39	0.527027	5.42717e-07	9.31051e-05
ENSG00000128342	LIF	0.568164	5.63681e-07	9.59089e-05
ENSG00000213373	LINC00671	0.501091	5.92035e-07	9.99143e-05
ENSG00000111335	OAS2	0.561684	6.23432e-07	0.000104364
ENSG00000125148	MT2A	0.53872	6.35978e-07	0.000105613
ENSG00000156587	UBE2L6	0.445539	6.46637e-07	0.000106531
ENSG00000135457	TFCP2	-0.238788	6.64366e-07	0.00010859
ENSG00000102524	TNFSF13B	0.400928	6.75812e-07	0.000109598
ENSG00000012223	LTF	0.544922	6.85261e-07	0.00010987
ENSG00000096006	CRISP3	0.550087	6.88078e-07	0.00010987
ENSG00000163399	ATP1A1	-0.273384	7.02658e-07	0.000111342
ENSG00000196866	HIST1H2AD	0.526626	7.08596e-07	0.000111432
ENSG00000134910	STT3A	-0.316574	7.1883e-07	0.000112192
ENSG00000185885	IFITM1	0.462732	7.5202e-07	0.000116496
ENSG00000181800	CELF2-AS1	0.484661	7.78015e-07	0.00011963
ENSG00000121060	TRIM25	0.330143	8.14173e-07	0.000124269
ENSG00000133063	CHIT1	0.557893	8.37994e-07	0.000126971
ENSG00000063978	RNF4	-0.214855	8.75871e-07	0.000131749
ENSG00000260539	RP11-252A24.7	-0.31108	8.97284e-07	0.000133999
ENSG00000107201	DDX58	0.484013	9.10098e-07	0.000134246
ENSG00000223401	RP11-211G3.2	0.459799	9.11872e-07	0.000134246
ENSG00000068079	IFI35	0.492288	9.24137e-07	0.000135093
ENSG00000148843	PDCD11	-0.253424	9.61409e-07	0.00013863
ENSG00000197846	HIST1H2BF	0.540775	9.61691e-07	0.00013863
ENSG00000255221	CARD17	0.555536	9.76292e-07	0.000139765
ENSG00000197043	ANXA6	-0.297207	1.01774e-06	0.0001447
ENSG00000243547	HNRNPKP4	-0.278892	1.02528e-06	0.000144781
ENSG00000197409	HIST1H3D	0.499359	1.0339e-06	0.000145012
ENSG00000260943	RP11-476D10.1	0.525945	1.11177e-06	0.000154887
ENSG00000105610	KLF1	0.537568	1.192e-06	0.000164958
ENSG00000116663	FBXO6	0.43963	1.22541e-06	0.000167248
ENSG00000133069	TMCC2	0.544755	1.22819e-06	0.000167248
ENSG00000239839	DEFA3	0.502063	1.23272e-06	0.000167248
ENSG00000231233	RP11-127L20.6	0.50296	1.26265e-06	0.000169097
ENSG00000242550	SERPINB10	0.54831	1.26193e-06	0.000169097
ENSG00000134809	TIMM10	0.517126	1.40128e-06	0.00018646
ENSG00000123700	KCNJ2	0.378273	1.44155e-06	0.00018939
ENSG00000141664	ZCCHC2	0.504372	1.43261e-06	0.00018939
ENSG00000198643	FAM3D	-0.543926	1.47497e-06	0.000192562
ENSG00000247317	RP11-273G15.2	0.544185	1.5629e-06	0.000202766
ENSG00000124256	ZBP1	0.500659	1.68633e-06	0.000217421
ENSG00000168899	VAMP5	0.39529	1.74663e-06	0.000222433
ENSG00000250011	HMGB1P3	0.41236	1.73695e-06	0.000222433
ENSG00000172159	FRMD3	0.483736	1.79559e-06	0.000227273
ENSG00000087237	CETP	0.468925	1.96335e-06	0.000247001
ENSG00000130635	COL5A1	-0.535949	1.9841e-06	0.000248108
ENSG00000130589	HELZ2	0.489622	2.00632e-06	0.000249384
ENSG00000188290	HES4	0.53739	2.04729e-06	0.000252963
ENSG00000130489	SCO2	0.404987	2.16448e-06	0.00026586
ENSG00000214797	RP11-1036E20.9	-0.525854	2.19526e-06	0.000268054
ENSG00000112079	STK38	-0.186149	2.22378e-06	0.000269949
ENSG00000081177	EXD2	-0.300103	2.27577e-06	0.000274653
ENSG00000225470	JPX	0.36793	2.30734e-06	0.000276855
ENSG00000120280	CXorf21	0.312636	2.37561e-06	0.000283408
ENSG00000213492	AC092661.2	0.471129	2.41929e-06	0.00028697
ENSG00000165185	KIAA1958	0.476307	2.51644e-06	0.000296797
ENSG00000160883	HK3	0.316108	2.53346e-06	0.000297116
ENSG00000166428	PLD4	-0.476345	2.74656e-06	0.000320298
ENSG00000133101	CCNA1	0.51495	2.85591e-06	0.00032935
ENSG00000152229	PSTPIP2	0.415453	2.84307e-06	0.00032935
ENSG00000241624	RP4-697K14.12	0.503071	2.92541e-06	0.0003355
ENSG00000255538	OR10V2P	0.524238	2.94843e-06	0.000336283
ENSG00000125166	GOT2	-0.249196	3.10909e-06	0.000352669
ENSG00000038210	PI4K2B	0.332028	3.25544e-06	0.000367263
ENSG00000010810	FYN	-0.175899	3.28831e-06	0.000368966
ENSG00000138674	SEC31A	-0.283802	3.32604e-06	0.000371194
ENSG00000143149	ALDH9A1	-0.299388	3.36021e-06	0.000373001
ENSG00000115267	IFIH1	0.467599	3.39582e-06	0.000374949
ENSG00000177989	ODF3B	0.439098	3.44283e-06	0.000378129
ENSG00000132780	NASP	0.222455	3.50268e-06	0.000382296
ENSG00000167986	DDB1	-0.262787	3.51761e-06	0.000382296
ENSG00000137414	FAM8A1	0.347852	3.75085e-06	0.000405521
ENSG00000114737	CISH	0.370089	3.82939e-06	0.000411868
ENSG00000163666	HESX1	0.497641	4.03285e-06	0.000431515
ENSG00000142089	IFITM3	0.517777	4.12413e-06	0.000439019
ENSG00000170581	STAT2	0.419036	4.28761e-06	0.000454093
ENSG00000248385	TARM1	0.496604	4.31742e-06	0.000454929
ENSG00000254470	AP5B1	0.372625	4.46605e-06	0.000468213
ENSG00000197694	SPTAN1	-0.29495	4.57296e-06	0.000477013
ENSG00000147697	GSDMC	0.500581	4.60362e-06	0.00047781
ENSG00000263899	RP11-214C8.5	-0.371326	4.69352e-06	0.000484717
ENSG00000198829	SUCNR1	0.503079	4.85163e-06	0.000498565
ENSG00000064270	ATP2C2	0.508053	4.89334e-06	0.000500374
ENSG00000163710	PCOLCE2	0.449066	5.00328e-06	0.000509108
ENSG00000116005	PCYOX1	-0.269219	5.03125e-06	0.000509457
ENSG00000232630	PRPS1P2	0.449627	5.20116e-06	0.000524106
ENSG00000116691	MIIP	0.266029	5.36728e-06	0.000536102
ENSG00000210194	J01415.20	-0.489742	5.37187e-06	0.000536102
ENSG00000175827	AP001266.1	0.365844	5.40064e-06	0.000536395
ENSG00000263276	RP11-96D1.10	-0.297576	5.45661e-06	0.000539373
ENSG00000166527	CLEC4D	0.487017	5.48759e-06	0.000539865
ENSG00000140718	FTO	-0.303403	5.82913e-06	0.00057076
ENSG00000166736	HTR3A	-0.504407	5.9292e-06	0.000577832
ENSG00000089737	DDX24	-0.259048	6.08843e-06	0.000590578
ENSG00000149136	SSRP1	-0.230569	6.27447e-06	0.000605793
ENSG00000110448	CD5	-0.25828	6.55339e-06	0.000628045
ENSG00000265168	RP11-192H23.5	-0.411137	6.56546e-06	0.000628045
ENSG00000065618	COL17A1	0.497389	6.63061e-06	0.000631368
ENSG00000197536	C5orf56	0.374631	6.84729e-06	0.000649023
ENSG00000237719	RP1-179N16.3	0.451641	7.194e-06	0.000678786
ENSG00000067704	IARS2	-0.274546	7.4151e-06	0.000693371
ENSG00000269640	CTD-2521M24.9	0.409011	7.41537e-06	0.000693371
ENSG00000114127	XRN1	0.314881	7.68729e-06	0.000715476
ENSG00000183638	RP1L1	0.401682	7.72072e-06	0.000715476
ENSG00000240890	RP11-65E22.2	0.498237	7.95783e-06	0.000734172
ENSG00000132383	RPA1	-0.249073	8.00524e-06	0.000735278
ENSG00000198604	BAZ1A	0.282292	8.19962e-06	0.000749813
ENSG00000114779	ABHD14B	-0.196231	8.5299e-06	0.000776595
ENSG00000161203	AP2M1	-0.213937	8.62205e-06	0.000778159
ENSG00000254602	AP000662.4	0.429145	8.6082e-06	0.000778159
ENSG00000183347	GBP6	0.496456	8.82005e-06	0.000792583
ENSG00000110107	PRPF19	-0.229717	8.92977e-06	0.000798984
ENSG00000072736	NFATC3	-0.273399	9.00866e-06	0.000802582
ENSG00000123689	G0S2	0.464769	9.44957e-06	0.000831231
ENSG00000162434	JAK1	-0.312348	9.45036e-06	0.000831231
ENSG00000229023	AC067945.3	0.498054	9.44619e-06	0.000831231
ENSG00000055163	CYFIP2	-0.210878	9.72099e-06	0.000851427
ENSG00000145685	LHFPL2	0.371027	9.82679e-06	0.000855722
ENSG00000221944	TIGD1	0.425995	9.85247e-06	0.000855722
ENSG00000259162	RP11-203M5.6	-0.495911	1.03165e-05	0.000892287
ENSG00000020577	SAMD4A	0.425851	1.03892e-05	0.000894849
ENSG00000197063	MAFG	0.31381	1.0583e-05	0.00090778
ENSG00000203814	HIST2H2BF	0.456396	1.09105e-05	0.000932016
ENSG00000160695	VPS11	-0.227385	1.10392e-05	0.000939146
ENSG00000165280	VCP	-0.293977	1.12189e-05	0.000950535
ENSG00000115415	STAT1	0.392532	1.1484e-05	0.000964518
ENSG00000189091	SF3B3	-0.263018	1.15233e-05	0.000964518
ENSG00000197635	DPP4	-0.313435	1.14917e-05	0.000964518
ENSG00000059378	PARP12	0.438769	1.17197e-05	0.00097615
ENSG00000181458	TMEM45A	0.447595	1.17563e-05	0.00097615
ENSG00000082516	GEMIN5	-0.304391	1.21565e-05	0.00100532
ENSG00000188282	RUFY4	0.449093	1.22044e-05	0.00100532
ENSG00000179222	MAGED1	-0.304047	1.2298e-05	0.00100902
ENSG00000138279	ANXA7	-0.197408	1.26428e-05	0.00103323
ENSG00000101079	NDRG3	-0.231025	1.27817e-05	0.00104048
ENSG00000225972	MTND1P23	0.463006	1.2905e-05	0.00104641
ENSG00000234571	RP5-998N21.4	0.479414	1.33361e-05	0.00107716
ENSG00000034063	UHRF1	0.368988	1.37151e-05	0.00109922
ENSG00000135387	CAPRIN1	-0.194853	1.36704e-05	0.00109922
ENSG00000115677	HDLBP	-0.240998	1.3885e-05	0.00110856
ENSG00000236333	TRHDE-AS1	0.37533	1.39933e-05	0.00111292
ENSG00000162772	ATF3	0.464338	1.41539e-05	0.0011214
ENSG00000087263	OGFOD1	-0.194541	1.42586e-05	0.0011254
ENSG00000122218	COPA	-0.239994	1.44113e-05	0.00113314
ENSG00000186431	FCAR	0.315236	1.45204e-05	0.00113741
ENSG00000152213	ARL11	0.189274	1.5192e-05	0.00118555
ENSG00000140464	PML	0.41889	1.52642e-05	0.00118672
ENSG00000152102	FAM168B	-0.216162	1.58822e-05	0.00123016
ENSG00000155229	MMS19	-0.182673	1.60896e-05	0.00123877
ENSG00000197646	PDCD1LG2	0.487808	1.61128e-05	0.00123877
ENSG00000085831	TTC39A	-0.461695	1.62734e-05	0.00124192
ENSG00000261685	RP11-401P9.4	0.44152	1.6226e-05	0.00124192
ENSG00000141543	EIF4A3	-0.220677	1.66983e-05	0.00126506
ENSG00000152558	TMEM123	0.386025	1.67594e-05	0.00126506
ENSG00000160716	CHRNB2	0.424991	1.67397e-05	0.00126506
ENSG00000139921	TMX1	0.365947	1.68883e-05	0.00127017
ENSG00000261115	TMEM178B	0.483444	1.69986e-05	0.00127386
ENSG00000129538	RNASE1	0.488315	1.72813e-05	0.00128575
ENSG00000152760	TCTEX1D1	0.439273	1.72686e-05	0.00128575
ENSG00000169871	TRIM56	0.370189	1.74967e-05	0.00129419
ENSG00000254429	CTD-2562J17.7	-0.314006	1.75193e-05	0.00129419
ENSG00000254667	AP000783.1	0.443866	1.7917e-05	0.00131887
ENSG00000106392	C1GALT1	0.337762	1.90989e-05	0.0014009
ENSG00000031698	SARS	-0.18613	1.92885e-05	0.00140983
ENSG00000087250	MT3	0.457983	1.94951e-05	0.00141993
ENSG00000089597	GANAB	-0.250805	2.04072e-05	0.001476
ENSG00000166793	YPEL4	0.479469	2.03469e-05	0.001476
ENSG00000197301	RP11-366L20.2	0.484043	2.0494e-05	0.00147713
ENSG00000118520	ARG1	0.482895	2.07891e-05	0.00149183
ENSG00000254477	AP000640.10	0.402155	2.08416e-05	0.00149183
ENSG00000006125	AP2B1	-0.212696	2.11638e-05	0.0014976
ENSG00000008256	CYTH3	-0.328339	2.1283e-05	0.0014976
ENSG00000156515	HK1	-0.263257	2.12607e-05	0.0014976
ENSG00000248971	KRT8P46	0.439998	2.12497e-05	0.0014976
ENSG00000259948	RP11-326A19.5	-0.315469	2.10638e-05	0.0014976
ENSG00000123609	NMI	0.305268	2.13573e-05	0.00149776
ENSG00000102974	CTCF	-0.266945	2.23593e-05	0.0015575
ENSG00000175166	PSMD2	-0.225629	2.23124e-05	0.0015575
ENSG00000059573	ALDH18A1	-0.279758	2.25157e-05	0.00156315
ENSG00000158406	HIST1H4H	0.401689	2.2636e-05	0.00156626
ENSG00000130303	BST2	0.374104	2.27835e-05	0.00157123
ENSG00000170801	HTRA3	0.43733	2.30748e-05	0.00158605
ENSG00000233488	AC108463.3	0.37513	2.35052e-05	0.0016103
ENSG00000149557	FEZ1	-0.451952	2.41467e-05	0.00164881
ENSG00000198786	MT-ND5	-0.410655	2.43726e-05	0.00165878
ENSG00000101266	CSNK2A1	-0.202394	2.45286e-05	0.00166394
ENSG00000174231	PRPF8	-0.286194	2.50219e-05	0.00169145
ENSG00000268485	AC104841.2	-0.253861	2.50972e-05	0.00169145
ENSG00000166913	YWHAB	-0.213616	2.52709e-05	0.00169217
ENSG00000197157	SND1	-0.252788	2.52247e-05	0.00169217
ENSG00000011426	ANLN	0.478401	2.56808e-05	0.00171192
ENSG00000130066	SAT1	0.278721	2.57307e-05	0.00171192
ENSG00000244005	NFS1	-0.165358	2.59256e-05	0.00171937
ENSG00000108691	CCL2	0.45012	2.60362e-05	0.00172121
ENSG00000232772	MTND4P22	-0.476074	2.67659e-05	0.00176383
ENSG00000211689	TRGC1	-0.427831	2.72883e-05	0.00179256
ENSG00000216331	HIST1H1PS1	0.470556	2.76347e-05	0.0018039
ENSG00000251230	RP11-701P16.5	0.448732	2.75896e-05	0.0018039
ENSG00000109046	WSB1	0.292203	2.78791e-05	0.00181415
ENSG00000136231	IGF2BP3	0.414007	2.84303e-05	0.00183547
ENSG00000136689	IL1RN	0.359426	2.83809e-05	0.00183547
ENSG00000136875	PRPF4	-0.175264	2.85605e-05	0.00183547
ENSG00000138772	ANXA3	0.461189	2.85536e-05	0.00183547
ENSG00000135829	DHX9	-0.186278	2.90447e-05	0.00184624
ENSG00000136167	LCP1	-0.219109	2.90819e-05	0.00184624
ENSG00000154217	PITPNC1	-0.181267	2.90832e-05	0.00184624
ENSG00000239961	LILRA4	-0.437172	2.90838e-05	0.00184624
ENSG00000138375	SMARCAL1	-0.213498	2.94971e-05	0.00186227
ENSG00000178685	PARP10	0.390786	2.95157e-05	0.00186227
ENSG00000147576	ADHFE1	-0.261085	3.14998e-05	0.00197406
ENSG00000198695	MT-ND6	-0.395235	3.15728e-05	0.00197406
ENSG00000233785	RP13-314C10.5	0.445215	3.15092e-05	0.00197406
ENSG00000115806	GORASP2	-0.176058	3.19765e-05	0.0019933
ENSG00000117281	CD160	-0.39827	3.21743e-05	0.00199365
ENSG00000141376	BCAS3	-0.247032	3.21355e-05	0.00199365
ENSG00000255328	RP11-326C3.12	0.467265	3.24192e-05	0.00200285
ENSG00000197121	PGAP1	0.41929	3.28575e-05	0.00202391
ENSG00000007968	E2F2	0.378809	3.30372e-05	0.00202895
ENSG00000185278	ZBTB37	0.347987	3.39756e-05	0.00208043
ENSG00000185104	FAF1	-0.227126	3.43432e-05	0.00209402
ENSG00000244498	RP11-477J21.5	0.467743	3.43993e-05	0.00209402
ENSG00000137449	CPEB2	0.345094	3.47562e-05	0.00210956
ENSG00000108984	MAP2K6	0.343355	3.51259e-05	0.00212578
ENSG00000095319	NUP188	-0.249819	3.55045e-05	0.00214245
ENSG00000254503	CTD-2521M24.4	0.43833	3.58887e-05	0.00215935
ENSG00000085511	MAP3K4	-0.197972	3.60571e-05	0.00216321
ENSG00000088930	XRN2	-0.248858	3.62807e-05	0.00217036
ENSG00000151779	NBAS	-0.278793	3.70218e-05	0.002202
ENSG00000259279	CTD-2033D15.1	-0.457594	3.69927e-05	0.002202
ENSG00000141367	CLTC	-0.223596	3.74356e-05	0.00222025
ENSG00000135597	REPS1	-0.189344	3.95391e-05	0.00233832
ENSG00000152242	C18orf25	0.275269	4.08998e-05	0.00241193
ENSG00000114030	KPNA1	-0.19416	4.17037e-05	0.00243855
ENSG00000153187	HNRNPU	-0.246448	4.16409e-05	0.00243855
ENSG00000164091	WDR82	-0.188804	4.16874e-05	0.00243855
ENSG00000145041	VPRBP	-0.202294	4.22025e-05	0.00246079
ENSG00000169375	SIN3A	-0.254497	4.26609e-05	0.00248054
ENSG00000196419	XRCC6	-0.257476	4.30206e-05	0.00249447
ENSG00000131558	EXOC4	-0.235903	4.38576e-05	0.00253592
ENSG00000115998	C2orf42	-0.190892	4.49755e-05	0.00258615
ENSG00000213918	DNASE1	0.213812	4.49417e-05	0.00258615
ENSG00000091542	ALKBH5	-0.167395	4.63279e-05	0.00265656
ENSG00000197965	MPZL1	-0.390667	4.6489e-05	0.00265845
ENSG00000122643	NT5C3	0.349779	4.70894e-05	0.00268539
ENSG00000116962	NID1	-0.407131	4.75915e-05	0.00270092
ENSG00000187116	LILRA5	0.331529	4.7622e-05	0.00270092
ENSG00000156500	FAM122C	0.283039	4.7996e-05	0.00271472
ENSG00000196116	TDRD7	0.331434	4.86022e-05	0.00274154
ENSG00000028116	VRK2	0.280296	4.88578e-05	0.00274287
ENSG00000141101	NOB1	-0.171661	4.88901e-05	0.00274287
ENSG00000102837	OLFM4	0.416382	4.91138e-05	0.00274799
ENSG00000148848	ADAM12	-0.455424	4.94898e-05	0.00276158
ENSG00000224512	AC021593.1	-0.293758	4.96629e-05	0.00276382
ENSG00000158019	BRE	-0.250002	5.07666e-05	0.00281017
ENSG00000266777	SH3GL1P1	0.347182	5.07096e-05	0.00281017
ENSG00000244361	RP11-1C1.1	0.461685	5.13817e-05	0.00283665
ENSG00000198668	CALM1	-0.154213	5.15308e-05	0.00283734
ENSG00000139618	BRCA2	0.396549	5.17997e-05	0.00284178
ENSG00000204843	DCTN1	-0.244609	5.18852e-05	0.00284178
ENSG00000258926	RP11-47I22.1	0.460089	5.23554e-05	0.00285998
ENSG00000135899	SP110	0.275054	5.24957e-05	0.00286012
ENSG00000137812	CASC5	0.435626	5.29683e-05	0.00287832
ENSG00000163840	DTX3L	0.32062	5.32488e-05	0.002886
ENSG00000196123	KIAA0895L	0.330318	5.42885e-05	0.00293469
ENSG00000143799	PARP1	-0.269123	5.64416e-05	0.00303527
ENSG00000202198	RN7SK	0.411793	5.63939e-05	0.00303527
ENSG00000072571	HMMR	0.456533	5.69712e-05	0.0030534
ENSG00000143771	CNIH4	0.291451	5.70728e-05	0.0030534
ENSG00000231123	SPATA20P1	0.415205	5.73697e-05	0.00306139
ENSG00000249934	RP11-466G12.3	0.405572	5.75972e-05	0.00306565
ENSG00000100320	RBFOX2	-0.441481	5.77575e-05	0.00306632
ENSG00000244515	KRT18P34	0.424602	5.85144e-05	0.00309858
ENSG00000214696	AC007347.1	-0.308152	5.87444e-05	0.00310284
ENSG00000170439	METTL7B	0.44825	5.91842e-05	0.00311814
ENSG00000166313	APBB1	-0.22266	5.95399e-05	0.00312893
ENSG00000107959	PITRM1	-0.21574	6.00405e-05	0.00314728
ENSG00000146250	PRSS35	-0.413196	6.05407e-05	0.0031655
ENSG00000079819	EPB41L2	-0.30397	6.09782e-05	0.00318037
ENSG00000136504	KAT7	-0.236541	6.12245e-05	0.00318521
ENSG00000251441	RTEL1P1	0.42652	6.15801e-05	0.0031957
ENSG00000090621	PABPC4	-0.177826	6.31455e-05	0.00325527
ENSG00000095139	ARCN1	-0.229984	6.31985e-05	0.00325527
ENSG00000133169	BEX1	0.401108	6.30185e-05	0.00325527
ENSG00000113013	HSPA9	-0.197838	6.52065e-05	0.00335039
ENSG00000065675	PRKCQ	-0.189411	6.5517e-05	0.00335803
ENSG00000108883	EFTUD2	-0.229836	6.63434e-05	0.00339201
ENSG00000022267	FHL1	-0.341893	6.75794e-05	0.00343827
ENSG00000251593	MSNP1	-0.330181	6.74801e-05	0.00343827
ENSG00000107864	CPEB3	0.317313	6.80535e-05	0.00345392
ENSG00000174799	CEP135	0.279687	6.86746e-05	0.00347055
ENSG00000244697	RP11-378J18.5	0.447303	6.87154e-05	0.00347055
ENSG00000100412	ACO2	-0.222925	7.02649e-05	0.00354019
ENSG00000140575	IQGAP1	-0.270185	7.07396e-05	0.00355548
ENSG00000118705	RPN2	-0.237127	7.14131e-05	0.00358066
ENSG00000211821	TRDV2	-0.442379	7.20871e-05	0.00360575
ENSG00000142583	SLC2A5	0.445073	7.427e-05	0.003706
ENSG00000141720	PIP4K2B	-0.123732	7.50204e-05	0.00373447
ENSG00000122641	INHBA	0.401614	7.52466e-05	0.00373677
ENSG00000179409	GEMIN4	-0.188843	7.72114e-05	0.00382519
ENSG00000115339	GALNT3	0.270821	7.78006e-05	0.00384463
ENSG00000136048	DRAM1	0.242079	7.79743e-05	0.00384463
ENSG00000133131	MORC4	-0.277535	7.94789e-05	0.00390954
ENSG00000088812	ATRN	-0.239192	8.05813e-05	0.00394506
ENSG00000180581	SRP9P1	0.327841	8.05668e-05	0.00394506
ENSG00000142961	MOB3C	0.278271	8.14948e-05	0.0039804
ENSG00000001497	LAS1L	-0.182291	8.18854e-05	0.00399009
ENSG00000144028	SNRNP200	-0.222814	8.26033e-05	0.00401564
ENSG00000183856	IQGAP3	0.436794	8.33182e-05	0.00404093
ENSG00000154451	GBP5	0.412459	8.37659e-05	0.00404375
ENSG00000231528	FAM225A	0.447713	8.36855e-05	0.00404375
ENSG00000162614	NEXN	0.394765	8.39923e-05	0.00404527
ENSG00000071127	WDR1	-0.17159	8.42883e-05	0.0040497
ENSG00000172057	ORMDL3	0.203524	8.44744e-05	0.0040497
ENSG00000171766	GATM	-0.378274	8.51334e-05	0.00407189
ENSG00000100336	APOL4	0.446102	8.59633e-05	0.00409272
ENSG00000124549	BTN2A3P	0.382381	8.58719e-05	0.00409272
ENSG00000136628	EPRS	-0.202004	8.82174e-05	0.00418086
ENSG00000176658	MYO1D	-0.316399	8.8127e-05	0.00418086
ENSG00000232842	RP5-961K14.1	-0.41062	8.8587e-05	0.00418881
ENSG00000253304	TMEM200B	-0.277657	8.89872e-05	0.00419817
ENSG00000148834	GSTO1	0.273189	8.99269e-05	0.00423288
ENSG00000147454	SLC25A37	0.275758	9.11629e-05	0.00428135
ENSG00000153283	CD96	-0.253197	9.21025e-05	0.00431572
ENSG00000029153	ARNTL2	0.425487	9.29483e-05	0.00434554
ENSG00000004487	KDM1A	-0.209509	9.44608e-05	0.00436143
ENSG00000145423	SFRP2	0.438728	9.39169e-05	0.00436143
ENSG00000151364	KCTD14	0.397577	9.45018e-05	0.00436143
ENSG00000159658	KIAA0494	-0.164645	9.41207e-05	0.00436143
ENSG00000212998	RBM12B-AS1	0.430378	9.42436e-05	0.00436143
ENSG00000249173	RP11-701P16.4	0.422195	9.45487e-05	0.00436143
ENSG00000114698	PLSCR4	0.390502	9.55462e-05	0.00439767
ENSG00000168439	STIP1	-0.221399	9.59947e-05	0.00440854
ENSG00000102794	IRG1	0.387742	9.73527e-05	0.00443228
ENSG00000112077	RHAG	0.416064	9.73659e-05	0.00443228
ENSG00000114450	GNB4	0.309868	9.6796e-05	0.00443228
ENSG00000269720	CTD-2521M24.5	0.4393	9.69875e-05	0.00443228
ENSG00000164944	KIAA1429	-0.179241	9.76087e-05	0.00443362
ENSG00000104043	ATP8B4	0.395069	9.83078e-05	0.00445562
ENSG00000067066	SP100	0.261509	0.000100106	0.00449784
ENSG00000182578	CSF1R	-0.344755	0.000100049	0.00449784
ENSG00000225431	AP001626.1	0.404992	9.94793e-05	0.00449784
ENSG00000245719	RP11-34F13.2	0.336457	9.97735e-05	0.00449784
ENSG00000103534	TMC5	0.408816	0.000100409	0.00450173
ENSG00000135108	FBXO21	-0.192526	0.000101034	0.00451998
ENSG00000163362	C1orf106	0.424333	0.000101375	0.00452547
ENSG00000238881	SCARNA2	0.323499	0.000102444	0.00456337
ENSG00000131979	GCH1	0.291993	0.000102893	0.00457357
ENSG00000035499	DEPDC1B	0.440751	0.000104394	0.00463036
ENSG00000119777	TMEM214	-0.173002	0.000104813	0.00463902
ENSG00000198561	CTNND1	-0.273922	0.000107717	0.00475743
ENSG00000024526	DEPDC1	0.411784	0.000108704	0.00479084
ENSG00000170624	SGCD	-0.394325	0.000109093	0.0047978
ENSG00000096384	HSP90AB1	-0.233625	0.000110685	0.00484519
ENSG00000104918	RETN	0.438647	0.000110781	0.00484519
ENSG00000133742	CA1	0.433667	0.000110876	0.00484519
ENSG00000225193	RPS12P26	0.404975	0.000111105	0.00484519
ENSG00000095932	C19orf77	0.424923	0.000114063	0.00496378
ENSG00000203865	ATP1A1OS	-0.239696	0.000114909	0.00499012
ENSG00000078053	AMPH	0.439016	0.000115426	0.00500212
ENSG00000131504	DIAPH1	-0.275598	0.00011618	0.00502431
ENSG00000116641	DOCK7	-0.322914	0.000117027	0.00503109
ENSG00000198821	CD247	-0.208785	0.000117064	0.00503109
ENSG00000228261	RP11-127L20.3	0.432764	0.00011699	0.00503109
ENSG00000101849	TBL1X	-0.281407	0.000118004	0.00506101
ENSG00000163902	RPN1	-0.173975	0.000118404	0.00506769
ENSG00000164576	SAP30L	0.204317	0.00011947	0.00510281
ENSG00000230191	RP4-725G10.3	0.372511	0.000119994	0.00511463
ENSG00000268573	RP11-158H5.7	0.298936	0.000121451	0.00516617
ENSG00000062485	CS	-0.212169	0.000121744	0.00516804
ENSG00000110108	TMEM109	-0.185407	0.000122077	0.00516905
ENSG00000170011	MYRIP	0.436353	0.000122266	0.00516905
ENSG00000073605	GSDMB	0.259769	0.000124881	0.00523172
ENSG00000112343	TRIM38	0.246603	0.000125261	0.00523172
ENSG00000130487	KLHDC7B	0.41709	0.000124921	0.00523172
ENSG00000169991	IFFO2	-0.235708	0.000125055	0.00523172
ENSG00000240065	PSMB9	0.267973	0.000124386	0.00523172
ENSG00000260350	RP11-152P23.2	0.368612	0.000124695	0.00523172
ENSG00000044574	HSPA5	-0.274707	0.000127848	0.00532904
ENSG00000104324	CPQ	-0.233662	0.000128146	0.00533077
ENSG00000074660	SCARF1	0.359112	0.000128808	0.00534457
ENSG00000154874	CCDC144B	0.434832	0.000128993	0.00534457
ENSG00000228981	RP11-364L4.1	0.434169	0.000133673	0.00552745
ENSG00000170396	ZNF804A	0.334378	0.000136788	0.00564503
ENSG00000171101	SIGLEC17P	-0.385469	0.000137509	0.00566351
ENSG00000155827	RNF20	-0.203488	0.000137829	0.00566545
ENSG00000136715	SAP130	-0.271776	0.00013925	0.00569111
ENSG00000167552	TUBA1A	-0.258676	0.000139276	0.00569111
ENSG00000215493	XXbac-B562F10.11	0.366222	0.00013876	0.00569111
ENSG00000172123	SLFN12	0.317248	0.000139987	0.00570896
ENSG00000084754	HADHA	-0.190187	0.000143602	0.00577692
ENSG00000111667	USP5	-0.188531	0.000143372	0.00577692
ENSG00000124490	CRISP2	0.376369	0.000142512	0.00577692
ENSG00000129317	PUS7L	0.325939	0.000142962	0.00577692
ENSG00000135363	LMO2	0.225697	0.000143562	0.00577692
ENSG00000136315	RP11-84C10.2	0.426331	0.00014209	0.00577692
ENSG00000138642	HERC6	0.411176	0.000143562	0.00577692
ENSG00000027075	PRKCH	-0.204522	0.000144706	0.00578535
ENSG00000035403	VCL	-0.281069	0.000144447	0.00578535
ENSG00000105568	PPP2R1A	-0.175163	0.000144926	0.00578535
ENSG00000131503	ANKHD1	-0.179998	0.000144668	0.00578535
ENSG00000146072	TNFRSF21	-0.415334	0.000147699	0.0058847
ENSG00000162437	RAVER2	-0.371837	0.000148052	0.00588748
ENSG00000227347	HNRNPKP2	-0.334812	0.000148389	0.0058896
ENSG00000104299	INTS9	-0.186742	0.000149482	0.0059045
ENSG00000123838	C4BPA	0.386175	0.000149091	0.0059045
ENSG00000168394	TAP1	0.271189	0.000149618	0.0059045
ENSG00000172738	TMEM217	0.417006	0.000151444	0.00596522
ENSG00000173692	PSMD1	-0.2036	0.000152621	0.00600018
ENSG00000142512	SIGLEC10	-0.354711	0.00015419	0.006039
ENSG00000163214	DHX57	-0.230883	0.000154041	0.006039
ENSG00000147140	NONO	-0.112326	0.000156361	0.00611252
ENSG00000099860	GADD45B	0.279182	0.000158743	0.00618235
ENSG00000239887	C1orf226	0.428727	0.000158559	0.00618235
ENSG00000141837	CACNA1A	0.389799	0.000159722	0.00620883
ENSG00000126262	FFAR2	0.320602	0.000162764	0.00631525
ENSG00000082014	SMARCD3	0.241049	0.0001642	0.00634722
ENSG00000136634	IL10	0.429557	0.000163986	0.00634722
ENSG00000251215	GOLGA5P1	0.379272	0.000164686	0.00635418
ENSG00000107719	PALD1	-0.379986	0.000165645	0.00637933
ENSG00000114923	SLC4A3	-0.413675	0.000167086	0.0064229
ENSG00000147065	MSN	-0.287181	0.000169164	0.00647879
ENSG00000159784	FAM131B	-0.367094	0.000168975	0.00647879
ENSG00000023171	GRAMD1B	0.33038	0.000171058	0.00653928
ENSG00000175216	CKAP5	-0.255501	0.000172123	0.00656789
ENSG00000236308	RP11-316M21.7	0.413139	0.000172769	0.00658042
ENSG00000077549	CAPZB	-0.192761	0.000173135	0.0065823
ENSG00000185811	IKZF1	-0.173318	0.000174114	0.00660744
ENSG00000005001	PRSS22	-0.41583	0.00017541	0.00664446
ENSG00000126858	RHOT1	0.224199	0.000178963	0.0067667
ENSG00000141756	FKBP10	-0.419614	0.000180259	0.00680328
ENSG00000150867	PIP4K2A	-0.227846	0.000181266	0.00682888
ENSG00000228203	RNF144A-AS1	0.413212	0.000181822	0.00683742
ENSG00000104490	NCALD	-0.264056	0.00018252	0.00685127
ENSG00000132002	DNAJB1	-0.200199	0.000183261	0.00686045
ENSG00000263203	CHTF8	-0.183652	0.000183426	0.00686045
ENSG00000075399	VPS9D1	0.296368	0.000185203	0.00691448
ENSG00000117868	ESYT2	-0.159031	0.00018744	0.00695164
ENSG00000146955	RAB19	0.385147	0.000186871	0.00695164
ENSG00000164054	SHISA5	0.31784	0.000187538	0.00695164
ENSG00000185880	TRIM69	0.258182	0.000187181	0.00695164
ENSG00000249437	NAIP	0.352579	0.000188017	0.00695697
ENSG00000115053	NCL	-0.205169	0.000188389	0.00695833
ENSG00000262112	RP11-670E13.5	0.289523	0.000189048	0.00697027
ENSG00000128335	APOL2	0.276048	0.000191788	0.00705874
ENSG00000080345	RIF1	0.266672	0.000192981	0.00709008
ENSG00000164509	IL31RA	0.423403	0.000194358	0.00712807
ENSG00000228601	RPL39P	-0.37667	0.000196308	0.00718688
ENSG00000071205	ARHGAP10	-0.258302	0.000197048	0.00720129
ENSG00000135451	TROAP	0.416139	0.000197952	0.00722159
ENSG00000118515	SGK1	-0.310022	0.000198576	0.00723165
ENSG00000131089	ARHGEF9	-0.209434	0.000199124	0.00723892
ENSG00000118162	KPTN	0.316917	0.000200283	0.00726833
ENSG00000153071	DAB2	-0.317955	0.000201364	0.00728485
ENSG00000256553	TRAV1-2	-0.388139	0.000201441	0.00728485
ENSG00000108771	DHX58	0.388667	0.000202726	0.00731109
ENSG00000146373	RNF217	0.34574	0.000202871	0.00731109
ENSG00000254006	RP11-1D12.2	0.328389	0.000208474	0.00749999
ENSG00000257433	RP1-197B17.3	0.350996	0.00021146	0.00759426
ENSG00000052749	RRP12	-0.290061	0.000212935	0.00762087
ENSG00000141682	PMAIP1	0.358292	0.000212846	0.00762087
ENSG00000196159	FAT4	-0.410475	0.00021493	0.00765268
ENSG00000198518	HIST1H4E	0.394642	0.000214746	0.00765268
ENSG00000259357	RP11-316M1.12	-0.201613	0.000214331	0.00765268
ENSG00000178999	AURKB	0.369036	0.000215663	0.00766564
ENSG00000198492	YTHDF2	-0.15479	0.000216624	0.00767353
ENSG00000246477	AF131216.6	0.322332	0.000216508	0.00767353
ENSG00000006744	ELAC2	-0.180365	0.000219177	0.00774349
ENSG00000135842	FAM129A	-0.285022	0.000219345	0.00774349
ENSG00000163637	PRICKLE2	-0.405541	0.000220564	0.0077733
ENSG00000168778	TCTN2	-0.310308	0.000221138	0.00778032
ENSG00000121774	KHDRBS1	-0.151149	0.000222015	0.00779795
ENSG00000090861	AARS	-0.232319	0.000223222	0.00780075
ENSG00000162714	ZNF496	0.33725	0.00022281	0.00780075
ENSG00000233875	RP11-61L14.6	0.421147	0.000223019	0.00780075
ENSG00000188987	HIST1H4D	0.413493	0.000224294	0.00782504
ENSG00000184557	SOCS3	0.389671	0.000225711	0.00786127
ENSG00000166803	KIAA0101	0.418469	0.000227566	0.00790616
ENSG00000183718	TRIM52	0.264102	0.000227841	0.00790616
ENSG00000264324	RP11-287D1.3	-0.18991	0.000228143	0.00790616
ENSG00000196371	FUT4	0.291249	0.000231022	0.00799258
ENSG00000169439	SDC2	-0.409702	0.000232214	0.00802045
ENSG00000166197	NOLC1	-0.208566	0.00023736	0.008171
ENSG00000225339	RP11-513I15.6	-0.163319	0.000237104	0.008171
ENSG00000112715	VEGFA	0.312294	0.00023817	0.00817178
ENSG00000175471	MCTP1	0.238112	0.00023804	0.00817178
ENSG00000112685	EXOC2	-0.20053	0.000241943	0.00828754
ENSG00000033050	ABCF2	-0.168158	0.000245968	0.00838393
ENSG00000123843	C4BPB	0.415824	0.000245728	0.00838393
ENSG00000232004	CAP1P2	-0.287298	0.000245285	0.00838393
ENSG00000176597	B3GNT5	0.327713	0.000249146	0.00847832
ENSG00000010270	STARD3NL	0.234294	0.000251092	0.00852455
ENSG00000113916	BCL6	0.278473	0.000251326	0.00852455
ENSG00000007202	KIAA0100	-0.165056	0.000252064	0.00853564
ENSG00000101161	PRPF6	-0.198057	0.000254973	0.00860606
ENSG00000170180	GYPA	0.380454	0.00025491	0.00860606
ENSG00000100271	TTLL1	-0.238324	0.00025566	0.00861524
ENSG00000116478	HDAC1	-0.134333	0.000257801	0.0086453
ENSG00000167881	SRP68	-0.168267	0.000257609	0.0086453
ENSG00000214612	RPS19P1	0.38607	0.000257417	0.0086453
ENSG00000017797	RALBP1	-0.245464	0.000260362	0.00868908
ENSG00000084463	WBP11	-0.185298	0.000259609	0.00868908
ENSG00000103995	CEP152	0.240734	0.000260078	0.00868908
ENSG00000212907	MT-ND4L	-0.321703	0.000260793	0.00868946
ENSG00000158887	MPZ	0.258377	0.000262447	0.00872539
ENSG00000204574	ABCF1	-0.223649	0.000262712	0.00872539
ENSG00000133739	LRRCC1	0.375317	0.00026656	0.00883907
ENSG00000220517	ASS1P1	0.399846	0.000267325	0.00885028
ENSG00000111249	CUX2	-0.393316	0.00026815	0.00885475
ENSG00000137076	TLN1	-0.27711	0.000268313	0.00885475
ENSG00000089220	PEBP1	-0.178024	0.000269932	0.00889118
ENSG00000115216	NRBP1	-0.157926	0.000270273	0.00889118
ENSG00000141627	DYM	-0.168577	0.000270845	0.00889587
ENSG00000108679	LGALS3BP	0.386879	0.000273062	0.00895389
ENSG00000165795	NDRG2	-0.26219	0.000273474	0.00895389
ENSG00000103544	C16orf62	-0.186904	0.000274446	0.00897157
ENSG00000116106	EPHA4	-0.316356	0.000275673	0.00899752
ENSG00000140284	SLC27A2	0.396139	0.00027636	0.00900579
ENSG00000226772	CTA-747E2.10	0.399429	0.000278956	0.00907614
ENSG00000213047	DENND1B	0.293032	0.000281322	0.00913877
ENSG00000011007	TCEB3	-0.159019	0.000282693	0.00914848
ENSG00000047634	SCML1	0.353696	0.000282608	0.00914848
ENSG00000236779	RP11-430C7.2	0.388591	0.000282943	0.00914848
ENSG00000132376	INPP5K	-0.148515	0.000284925	0.00919826
ENSG00000099910	KLHL22	-0.153754	0.000286505	0.00920212
ENSG00000175354	PTPN2	0.215734	0.000286024	0.00920212
ENSG00000182504	CEP97	0.252854	0.000286818	0.00920212
ENSG00000198700	IPO9	-0.125908	0.000286391	0.00920212
ENSG00000152127	MGAT5	-0.217129	0.000287932	0.0092236
ENSG00000089177	KIF16B	-0.312133	0.000288969	0.00924255
ENSG00000086065	CHMP5	0.377246	0.000292007	0.00931105
ENSG00000113319	RASGRF2	-0.262186	0.000291606	0.00931105
ENSG00000131043	AAR2	-0.169881	0.000293912	0.00934694
ENSG00000239948	Metazoa_SRP	0.404093	0.000294484	0.00934694
ENSG00000258227	CLEC5A	0.381512	0.000294439	0.00934694
ENSG00000164713	BRI3	0.189878	0.000295236	0.0093565
ENSG00000221886	C5orf54	0.383288	0.000296178	0.00937205
ENSG00000070756	PABPC1	-0.16094	0.000297106	0.00938709
ENSG00000235192	AC009495.2	0.360241	0.00029968	0.00945403
ENSG00000102554	KLF5	0.353585	0.000300921	0.00947879
ENSG00000067596	DHX8	-0.251416	0.000302859	0.00951645
ENSG00000198039	ZNF273	0.296572	0.000303034	0.00951645
ENSG00000019991	HGF	0.293094	0.000305112	0.00956512
ENSG00000169248	CXCL11	0.35094	0.000305505	0.00956512
ENSG00000183486	MX2	0.323935	0.000307016	0.00959254
ENSG00000204261	XXbac-BPG246D15.8	0.194666	0.000307305	0.00959254
ENSG00000248988	RP11-815N9.2	0.382215	0.000308597	0.0096184
ENSG00000131378	RFTN1	-0.187077	0.000309923	0.00964526
ENSG00000100911	PSME2	0.24652	0.000311038	0.00965842
ENSG00000187097	ENTPD5	-0.155167	0.000311277	0.00965842
ENSG00000198727	MT-CYB	-0.317068	0.000312197	0.00967253
ENSG00000163220	S100A9	0.320561	0.000313678	0.00970393
ENSG00000001561	ENPP4	0.337722	0.000315189	0.00970524
ENSG00000182670	TTC3	-0.190147	0.000315591	0.00970524
ENSG00000203747	FCGR3A	-0.252836	0.000314848	0.00970524
ENSG00000215068	AC025171.1	0.242115	0.000315461	0.00970524
ENSG00000233392	AC104809.4	-0.407644	0.00031895	0.00979403
ENSG00000152804	HHEX	0.199185	0.000322015	0.0098642
ENSG00000237135	RP11-330O11.2	0.410457	0.000322186	0.0098642
ENSG00000230185	C9orf147	0.408507	0.000324331	0.00991527
ENSG00000196584	XRCC2	0.39116	0.000327988	0.0100123
ENSG00000168802	CHTF8	-0.152499	0.000328831	0.0100233
ENSG00000173821	RNF213	0.31506	0.00033293	0.0101334
ENSG00000132470	ITGB4	-0.373939	0.000336113	0.0102063
ENSG00000197746	PSAP	-0.250204	0.000336308	0.0102063
ENSG00000188001	TPRG1	-0.337677	0.00033749	0.0102272
ENSG00000254782	RP11-155D18.12	-0.216081	0.000339198	0.0102639
ENSG00000171617	ENC1	-0.365048	0.000340262	0.0102812
ENSG00000144130	NT5DC4	0.35442	0.000340955	0.0102871
ENSG00000147010	SH3KBP1	-0.231449	0.000342456	0.0103025
ENSG00000227032	RP11-34E5.4	0.408482	0.00034236	0.0103025
ENSG00000110713	NUP98	-0.234379	0.000346334	0.010404
ENSG00000169403	PTAFR	-0.25868	0.000348728	0.0104608
ENSG00000116717	GADD45A	0.325288	0.000349588	0.0104715
ENSG00000198886	MT-ND4	-0.298942	0.000350883	0.0104952
ENSG00000188761	BCL2L15	0.401239	0.000352134	0.0105174
ENSG00000206561	COLQ	-0.313039	0.000353186	0.0105337
ENSG00000122547	EEPD1	-0.27254	0.000355185	0.0105781
ENSG00000107742	SPOCK2	-0.206502	0.000357413	0.010614
ENSG00000143545	RAB13	0.392616	0.000356991	0.010614
ENSG00000231680	AP003774.6	0.335293	0.000359563	0.0106626
ENSG00000115884	SDC1	0.375895	0.000368778	0.0109047
ENSG00000204852	TCTN1	-0.232989	0.000368455	0.0109047
ENSG00000223387	RP11-408H1.3	0.392431	0.000372299	0.0109932
ENSG00000182809	CRIP2	-0.355219	0.000375187	0.0110627
ENSG00000133706	LARS	-0.177722	0.000376813	0.0110635
ENSG00000164211	STARD4	0.289964	0.000376329	0.0110635
ENSG00000175792	RUVBL1	-0.157059	0.000376131	0.0110635
ENSG00000184916	JAG2	0.333204	0.000379773	0.0111347
ENSG00000198843	SELT	0.234534	0.00038322	0.0112041
ENSG00000267632	RP11-400F19.18	0.346486	0.000383024	0.0112041
ENSG00000261438	RP11-399O19.8	0.306868	0.000384063	0.0112129
ENSG00000167257	RNF214	-0.163592	0.000386527	0.011269
ENSG00000138363	ATIC	-0.212464	0.000393822	0.0113226
ENSG00000148600	CDHR1	-0.363734	0.000391751	0.0113226
ENSG00000159023	EPB41	-0.25219	0.000393343	0.0113226
ENSG00000164167	LSM6	0.219929	0.000392722	0.0113226
ENSG00000219626	FAM228B	0.262483	0.000391764	0.0113226
ENSG00000249119	MTND6P4	-0.369784	0.000389112	0.0113226
ENSG00000251380	C5orf20	-0.360324	0.00039082	0.0113226
ENSG00000254996	ANKHD1-EIF4EBP3	-0.180969	0.000393738	0.0113226
ENSG00000257621	RP11-349A22.5	0.190152	0.000392284	0.0113226
ENSG00000258575	RP11-998D10.2	-0.287616	0.000390643	0.0113226
ENSG00000100342	APOL1	0.312211	0.000395203	0.0113467
ENSG00000115241	PPM1G	-0.155258	0.000400535	0.0114838
ENSG00000113763	UNC5A	0.333639	0.000402078	0.0115122
ENSG00000173239	LIPM	0.363038	0.000403395	0.011534
ENSG00000198824	CHAMP1	-0.245327	0.00040401	0.0115357
ENSG00000234290	AC116366.6	0.324277	0.00040692	0.0116028
ENSG00000116031	CD207	-0.375515	0.000408229	0.0116242
ENSG00000169607	CKAP2L	0.399006	0.000410983	0.0116865
ENSG00000104356	POP1	-0.237534	0.000418475	0.0118833
ENSG00000010292	NCAPD2	-0.208868	0.000423882	0.0119513
ENSG00000162545	CAMK2N1	-0.3325	0.000427653	0.0119513
ENSG00000166002	C11orf75	0.23859	0.000427059	0.0119513
ENSG00000171517	LPAR3	0.396214	0.000425447	0.0119513
ENSG00000175130	MARCKSL1	-0.219311	0.000426261	0.0119513
ENSG00000175518	UBQLNL	0.392142	0.00042579	0.0119513
ENSG00000180626	ZNF594	0.323984	0.000427779	0.0119513
ENSG00000197353	LYPD2	-0.398309	0.000426484	0.0119513
ENSG00000231607	DLEU2	0.264952	0.000425555	0.0119513
ENSG00000232439	RPL18AP7	0.361781	0.000424818	0.0119513
ENSG00000244617	ASPRV1	0.291805	0.000422506	0.0119513
ENSG00000258989	RP11-47I22.4	-0.216518	0.000421847	0.0119513
ENSG00000227671	RP11-488L18.4	0.282541	0.000430496	0.0120111
ENSG00000213073	RP11-288H12.3	0.280926	0.000433656	0.0120668
ENSG00000255801	RP11-561P12.5	0.392325	0.000433306	0.0120668
ENSG00000145907	G3BP1	-0.164716	0.000437501	0.0121412
ENSG00000229152	ANKRD10-IT1	0.341976	0.000437431	0.0121412
ENSG00000223629	DEFA8P	0.274191	0.000438351	0.0121486
ENSG00000125107	CNOT1	-0.226187	0.000442475	0.0122465
ENSG00000066117	SMARCD1	-0.123606	0.000445115	0.0122662
ENSG00000138668	HNRNPD	-0.129556	0.000444424	0.0122662
ENSG00000149480	MTA2	-0.141854	0.000446141	0.0122662
ENSG00000160208	RRP1B	-0.168011	0.000444261	0.0122662
ENSG00000168528	SERINC2	0.34485	0.000445801	0.0122662
ENSG00000129946	SHC2	0.397505	0.000454135	0.012453
ENSG00000206177	HBM	0.379152	0.000453927	0.012453
ENSG00000127564	PKMYT1	0.300037	0.000455271	0.0124677
ENSG00000253251	CTC-534A2.2	0.362618	0.000456489	0.0124846
ENSG00000124785	NRN1	0.394221	0.000457387	0.0124927
ENSG00000178104	PDE4DIP	-0.177649	0.000459232	0.0125107
ENSG00000226125	AC098823.3	0.398097	0.000459251	0.0125107
ENSG00000130826	DKC1	-0.139112	0.000460782	0.0125359
ENSG00000111247	RAD51AP1	0.396468	0.000465647	0.0126296
ENSG00000172007	RAB33B	0.262706	0.000465781	0.0126296
ENSG00000176438	SYNE3	0.257692	0.000466178	0.0126296
ENSG00000259865	RP11-488L18.10	0.319387	0.000466657	0.0126296
ENSG00000211784	TRAV10	-0.373063	0.000467372	0.0126324
ENSG00000261868	RP11-104O19.2	0.396843	0.000468121	0.0126362
ENSG00000186153	WWOX	-0.246745	0.000469084	0.0126458
ENSG00000136485	DCAF7	-0.185309	0.000472296	0.0127159
ENSG00000089234	BRAP	-0.182404	0.000473214	0.0127241
ENSG00000131355	EMR3	-0.256757	0.000475975	0.0127488
ENSG00000163605	PPP4R2	0.284089	0.000475813	0.0127488
ENSG00000186185	KIF18B	0.396774	0.000475649	0.0127488
ENSG00000258521	RP11-638I2.9	0.381607	0.000476779	0.0127538
ENSG00000102245	CD40LG	-0.252966	0.000478457	0.0127823
ENSG00000168995	SIGLEC7	-0.269986	0.000483806	0.0129085
ENSG00000134716	CYP2J2	0.395722	0.000486127	0.0129254
ENSG00000158467	AHCYL2	-0.191061	0.000485813	0.0129254
ENSG00000255441	CTD-2616J11.2	-0.324437	0.000486306	0.0129254
ENSG00000162654	GBP4	0.341167	0.000491968	0.0130549
ENSG00000175567	UCP2	-0.217541	0.000492436	0.0130549
ENSG00000158941	KIAA1967	-0.137091	0.000497596	0.0131749
ENSG00000157349	DDX19B	-0.175426	0.000500417	0.0132327
ENSG00000140598	EFTUD1	-0.208475	0.000503252	0.0132907
ENSG00000242314	RP11-428G5.2	0.390393	0.000508963	0.0134245
ENSG00000267554	RP11-686D22.10	0.334698	0.000509786	0.0134291
ENSG00000251474	RPL32P3	0.230165	0.000515183	0.0135541
ENSG00000080561	MID2	-0.338523	0.00051681	0.0135797
ENSG00000177917	ARL6IP6	0.218441	0.000518992	0.0136198
ENSG00000182379	NXPH4	-0.392446	0.000525055	0.0137615
ENSG00000196954	CASP4	0.179212	0.000526801	0.0137725
ENSG00000198744	RP5-857K21.11	-0.274399	0.000526586	0.0137725
ENSG00000156671	SAMD8	0.216707	0.00053164	0.013864
ENSG00000175793	SFN	0.377809	0.000531028	0.013864
ENSG00000184292	TACSTD2	0.381895	0.000533196	0.0138872
ENSG00000042062	FAM65C	0.324961	0.000537759	0.0139361
ENSG00000065911	MTHFD2	0.24036	0.00053734	0.0139361
ENSG00000176868	AL358781.1	-0.182588	0.000537717	0.0139361
ENSG00000198730	CTR9	-0.190866	0.000535843	0.0139361
ENSG00000242661	RP11-113C12.1	0.368355	0.000538876	0.0139476
ENSG00000213928	IRF9	0.241355	0.00054137	0.0139773
ENSG00000255835	RP4-559A3.7	-0.165739	0.000540712	0.0139773
ENSG00000087365	SF3B2	-0.236136	0.000545256	0.0140487
ENSG00000114861	FOXP1	-0.181304	0.000547518	0.0140487
ENSG00000136827	TOR1A	0.179436	0.00054699	0.0140487
ENSG00000146674	IGFBP3	-0.355354	0.000545713	0.0140487
ENSG00000163687	DNASE1L3	-0.386593	0.000546306	0.0140487
ENSG00000075218	GTSE1	0.376742	0.000553103	0.0141745
ENSG00000180425	C11orf71	0.223297	0.000553791	0.0141746
ENSG00000136816	TOR1B	0.317562	0.000556733	0.0142306
ENSG00000171658	RP11-443P15.2	0.386176	0.00055735	0.0142306
ENSG00000110321	EIF4G2	-0.148183	0.000558874	0.014252
ENSG00000168781	PPIP5K1	-0.203358	0.000560005	0.0142633
ENSG00000070061	IKBKAP	-0.192453	0.000560791	0.0142658
ENSG00000058262	SEC61A1	-0.173804	0.000564922	0.0143358
ENSG00000110031	LPXN	-0.186065	0.000564678	0.0143358
ENSG00000130803	ZNF317	-0.189285	0.000568035	0.0143972
ENSG00000153823	PID1	-0.361944	0.000571295	0.0144621
ENSG00000092820	EZR	-0.230813	0.000573704	0.0145054
ENSG00000099995	SF3A1	-0.249865	0.000577671	0.0145741
ENSG00000186810	CXCR3	-0.25838	0.000577826	0.0145741
ENSG00000257511	RP11-278C7.1	0.302487	0.000581658	0.014653
ENSG00000269728	RP11-145M9.4	0.230538	0.000584126	0.0146973
ENSG00000163346	PBXIP1	-0.253791	0.000585504	0.0147141
ENSG00000239306	RBM14	-0.146178	0.000588232	0.0147648
ENSG00000062524	LTK	-0.358069	0.00058959	0.0147811
ENSG00000092201	SUPT16H	-0.142827	0.000592692	0.0148259
ENSG00000132142	ACACA	-0.175497	0.000593289	0.0148259
ENSG00000245275	CTB-157D17.1	0.315118	0.000593523	0.0148259
ENSG00000148730	EIF4EBP2	-0.144253	0.000599348	0.0149534
ENSG00000186354	C9orf47	0.346853	0.000601837	0.0149975
ENSG00000137757	CASP5	0.346125	0.000607661	0.0151245
ENSG00000235823	LINC00263	0.305498	0.000612387	0.0152239
ENSG00000263466	RP1-56K13.2	0.383151	0.000613939	0.0152442
ENSG00000109805	NCAPG	0.337098	0.000615911	0.0152749
ENSG00000135535	CD164	0.217719	0.000620146	0.0153432
ENSG00000235919	ASH1L-AS1	0.27648	0.000619925	0.0153432
ENSG00000198589	LRBA	-0.242013	0.000622899	0.0153831
ENSG00000249042	CTD-2015H6.3	0.358264	0.000623237	0.0153831
ENSG00000228668	TRGV5P	0.388634	0.000624444	0.0153946
ENSG00000260249	RP11-401P9.5	0.260238	0.00062563	0.0154055
ENSG00000108309	RUNDC3A	0.380202	0.000636345	0.0156508
ENSG00000159723	AGRP	0.379648	0.000637185	0.0156529
ENSG00000037637	FBXO42	-0.151111	0.000639429	0.0156879
ENSG00000134954	ETS1	-0.205652	0.000640122	0.0156879
ENSG00000145365	TIFA	0.286356	0.000642248	0.0157038
ENSG00000260592	CTA-363E6.6	0.371032	0.000642283	0.0157038
ENSG00000111790	FGFR1OP2	0.242171	0.000646067	0.0157777
ENSG00000255833	TIFAB	-0.345674	0.000649141	0.0158342
ENSG00000131236	CAP1	-0.149513	0.000652183	0.0158711
ENSG00000169228	RAB24	0.203889	0.000651668	0.0158711
ENSG00000069248	NUP133	-0.218059	0.00065416	0.0159005
ENSG00000204475	NCR3	-0.267094	0.000656077	0.0159138
ENSG00000237522	NONOP2	0.286272	0.000656239	0.0159138
ENSG00000149428	HYOU1	-0.177395	0.000657323	0.0159215
ENSG00000188175	HEPACAM2	0.358188	0.000659212	0.0159486
ENSG00000158882	TOMM40L	0.189353	0.000663115	0.0160058
ENSG00000214279	RP11-108K14.4	-0.343811	0.000662688	0.0160058
ENSG00000013275	PSMC4	-0.170694	0.000670342	0.0161426
ENSG00000067064	IDI1	0.299151	0.000669684	0.0161426
ENSG00000054118	THRAP3	-0.214313	0.000671455	0.0161432
ENSG00000074800	ENO1	-0.220408	0.000672832	0.0161432
ENSG00000125630	POLR1B	-0.188473	0.000672866	0.0161432
ENSG00000136147	PHF11	0.255527	0.000673477	0.0161432
ENSG00000130726	TRIM28	-0.159524	0.000674908	0.0161589
ENSG00000248643	RBM14-RBM4	-0.14378	0.000676496	0.0161782
ENSG00000229164	TRAC	-0.198466	0.000678286	0.0162024
ENSG00000233214	AC002511.2	0.363792	0.000682001	0.0162724
ENSG00000185168	LINC00482	0.338992	0.000683977	0.0163008
ENSG00000157483	MYO1E	-0.301815	0.000685653	0.016322
ENSG00000148154	UGCG	0.324236	0.000689528	0.0163954
ENSG00000126216	TUBGCP3	-0.220689	0.000692214	0.0164405
ENSG00000136051	KIAA1033	0.261493	0.000693686	0.0164539
ENSG00000239219	RP11-379K17.4	0.359097	0.000694365	0.0164539
ENSG00000259657	RP11-361D15.1	0.351166	0.000697943	0.0165198
ENSG00000268397	AC008443.1	0.240982	0.000701925	0.0165952
ENSG00000196230	TUBB	-0.177643	0.000709184	0.0167317
ENSG00000240178	CA5B-AS1	-0.244419	0.000709314	0.0167317
ENSG00000141510	TP53	-0.165016	0.000710847	0.0167489
ENSG00000060237	WNK1	-0.243034	0.000713551	0.0167935
ENSG00000234436	AC008984.7	0.384467	0.000714408	0.0167946
ENSG00000187951	ARHGAP11B	0.312267	0.000716265	0.0168193
ENSG00000130147	SH3BP4	-0.333438	0.000717157	0.0168212
ENSG00000142192	APP	-0.274805	0.000718081	0.0168238
ENSG00000143157	POGK	-0.143676	0.000719343	0.0168344
ENSG00000148248	SURF4	-0.0992148	0.000720267	0.016837
ENSG00000123130	ACOT9	0.237897	0.000727154	0.0169789
ENSG00000100888	CHD8	-0.182361	0.000730937	0.0170481
ENSG00000161217	PCYT1A	-0.109724	0.000733848	0.0170847
ENSG00000183049	CAMK1D	-0.256063	0.000734152	0.0170847
ENSG00000075624	ACTB	-0.220099	0.000735132	0.0170883
ENSG00000137124	ALDH1B1	-0.239009	0.000742083	0.0172306
ENSG00000226085	UQCRFS1P1	0.3003	0.000746969	0.0173247
ENSG00000083817	ZNF416	-0.210901	0.000749851	0.0173721
ENSG00000171115	GIMAP8	-0.228384	0.000756596	0.0175088
ENSG00000008438	PGLYRP1	0.352054	0.000762126	0.0175976
ENSG00000107798	LIPA	-0.246366	0.000761423	0.0175976
ENSG00000163568	AIM2	0.332421	0.000767784	0.0177085
ENSG00000124942	AHNAK	-0.272876	0.000771221	0.017768
ENSG00000136448	NMT1	-0.123494	0.000774433	0.0177828
ENSG00000172183	ISG20	0.26535	0.000773428	0.0177828
ENSG00000256262	USP30-AS1	0.287335	0.000773766	0.0177828
ENSG00000213702	AC008865.1	-0.208292	0.000776327	0.0178066
ENSG00000165733	BMS1	-0.203865	0.000780944	0.0178928
ENSG00000164104	HMGB2	0.33062	0.000782856	0.0179168
ENSG00000215421	ZNF407	-0.162707	0.00079831	0.0182504
ENSG00000115207	GTF3C2	-0.119742	0.000799506	0.0182576
ENSG00000225698	IGHV3-72	-0.37259	0.000802635	0.0183089
ENSG00000250959	GLUD1P3	0.321416	0.000805506	0.0183542
ENSG00000144228	SPOPL	0.22948	0.000807861	0.0183676
ENSG00000197763	TXNRD3	-0.354217	0.000807487	0.0183676
ENSG00000255591	AL590762.1	-0.194165	0.000810211	0.0184008
ENSG00000187555	USP7	-0.18822	0.000815765	0.0184845
ENSG00000237765	FAM200B	0.185975	0.000814789	0.0184845
ENSG00000268734	CTB-61M7.2	0.270072	0.000816568	0.0184845
ENSG00000075568	TMEM131	-0.195858	0.000827847	0.0187195
ENSG00000124107	SLPI	0.377552	0.000833662	0.0188304
ENSG00000126787	DLGAP5	0.379054	0.000838644	0.0188813
ENSG00000172965	AC068491.1	0.26075	0.000837196	0.0188813
ENSG00000267576	CTC-510F12.6	-0.248001	0.000838516	0.0188813
ENSG00000007516	BAIAP3	-0.350713	0.000841566	0.0189061
ENSG00000138755	CXCL9	0.378815	0.000841403	0.0189061
ENSG00000256261	AC104698.1	-0.168964	0.000848647	0.0190446
ENSG00000113368	LMNB1	0.256434	0.000853362	0.0191297
ENSG00000080503	SMARCA2	-0.22204	0.000855836	0.0191644
ENSG00000126368	NR1D1	-0.241251	0.000856888	0.0191673
ENSG00000146247	PHIP	0.298719	0.000860996	0.0192385
ENSG00000140526	ABHD2	-0.237522	0.000871431	0.0193724
ENSG00000143365	RORC	-0.334875	0.000870885	0.0193724
ENSG00000163823	CCR1	0.298689	0.000871654	0.0193724
ENSG00000173041	ZNF680	0.328726	0.000868356	0.0193724
ENSG00000242590	RP11-54O7.14	0.368685	0.000871008	0.0193724
ENSG00000145216	FIP1L1	-0.137291	0.00087584	0.0194446
ENSG00000107281	NPDC1	0.335124	0.000877012	0.0194498
ENSG00000165238	WNK2	-0.369418	0.000881073	0.0194814
ENSG00000253193	FCGR1C	0.335225	0.000880077	0.0194814
ENSG00000260861	RP4-576H24.4	-0.257866	0.000881253	0.0194814
ENSG00000106609	TMEM248	-0.113688	0.000885637	0.0195575
ENSG00000177820	AC004917.1	0.301928	0.000886721	0.0195606
ENSG00000119401	TRIM32	-0.184586	0.000892687	0.0196713
ENSG00000101412	E2F1	0.303224	0.000895875	0.0197207
ENSG00000259182	RP11-424I19.2	0.372742	0.000898813	0.0197644
ENSG00000228915	RP11-757C15.2	0.347754	0.000900268	0.0197754
ENSG00000165685	TMEM52B	0.318921	0.000902427	0.0198019
ENSG00000170312	CDK1	0.374032	0.000905755	0.0198539
ENSG00000136193	SCRN1	-0.262873	0.000909501	0.019915
ENSG00000108468	CBX1	-0.149478	0.000911984	0.0199483
ENSG00000134899	ERCC5	-0.147389	0.000922928	0.0201241
ENSG00000171824	EXOSC10	-0.143484	0.000922754	0.0201241
ENSG00000213626	LBH	-0.164019	0.000922394	0.0201241
ENSG00000138190	EXOC6	0.222485	0.000925495	0.0201589
ENSG00000075856	SART3	-0.135267	0.000929583	0.0201854
ENSG00000115129	TP53I3	0.253449	0.000929631	0.0201854
ENSG00000241945	PWP2	-0.139379	0.000928848	0.0201854
ENSG00000134186	PRPF38B	0.201573	0.00093538	0.0202891
ENSG00000156453	PCDH1	-0.369683	0.000936446	0.020291
ENSG00000198888	MT-ND1	-0.275601	0.000941027	0.020369
ENSG00000025772	TOMM34	-0.180849	0.000951166	0.0205582
ENSG00000127152	BCL11B	-0.19438	0.00095175	0.0205582
ENSG00000233966	UBE2SP1	0.371278	0.000954643	0.0205992
ENSG00000173914	RBM4B	-0.138893	0.000958579	0.0206627
ENSG00000110330	BIRC2	0.251555	0.000961606	0.0207065
ENSG00000122507	BBS9	-0.2508	0.000969981	0.0208651
ENSG00000111266	DUSP16	-0.225449	0.000973818	0.020926
ENSG00000117010	ZNF684	0.348613	0.000976254	0.020935
ENSG00000180182	MED14	-0.166314	0.000975531	0.020935
ENSG00000186814	ZSCAN30	0.19685	0.000977303	0.0209359
ENSG00000068366	ACSL4	0.243944	0.000989151	0.0211374
ENSG00000151657	KIN	0.187109	0.000989767	0.0211374
ENSG00000178177	LCORL	0.236873	0.000989147	0.0211374
ENSG00000100335	SMCR7L	-0.108438	0.000993758	0.0211431
ENSG00000166224	SGPL1	-0.181328	0.00099277	0.0211431
ENSG00000172215	CXCR6	-0.326129	0.000996491	0.0211431
ENSG00000180644	PRF1	-0.276125	0.000993097	0.0211431
ENSG00000206053	HN1L	-0.140792	0.000997163	0.0211431
ENSG00000244491	RP3-508I15.18	-0.146691	0.000996996	0.0211431
ENSG00000256633	RP11-169D4.2	-0.289964	0.00099464	0.0211431
ENSG00000079215	SLC1A3	0.370937	0.00100092	0.02116
ENSG00000113638	TTC33	0.287612	0.000999457	0.02116
ENSG00000224186	CTC-203F4.1	0.236334	0.00100102	0.02116
ENSG00000177156	TALDO1	-0.190073	0.00100477	0.0212177
ENSG00000132305	IMMT	-0.172015	0.00100608	0.0212239
ENSG00000124224	PPP4R1L	0.206664	0.0010082	0.021247
ENSG00000132432	SEC61G	0.219908	0.00102009	0.0214756
ENSG00000135018	UBQLN1	-0.140775	0.00102308	0.0214951
ENSG00000183837	PNMA3	-0.322157	0.00102212	0.0214951
ENSG00000103512	NOMO1	-0.258203	0.00102692	0.0215232
ENSG00000180233	ZNRF2	0.192426	0.00102586	0.0215232
ENSG00000225447	RPS15AP10	0.367811	0.00102753	0.0215232
ENSG00000183473	SSTR3	0.307302	0.00102946	0.0215418
ENSG00000173933	RBM4	-0.136621	0.00103412	0.0216176
ENSG00000134684	YARS	-0.165685	0.00103721	0.0216604
ENSG00000163453	IGFBP7	0.229998	0.00104223	0.0217434
ENSG00000204466	DGKK	-0.365538	0.00104716	0.0218243
ENSG00000264462	MIR3648	0.359303	0.00105207	0.0219047
ENSG00000167207	NOD2	0.287955	0.00105446	0.0219231
ENSG00000170266	GLB1	-0.227069	0.00105573	0.0219231
ENSG00000173578	XCR1	-0.371171	0.00105824	0.0219231
ENSG00000214753	HNRNPUL2	-0.208817	0.00105762	0.0219231
ENSG00000250893	RP11-588L15.2	0.364745	0.00105771	0.0219231
ENSG00000204936	CD177	0.359417	0.0010593	0.0219232
ENSG00000106605	BLVRA	0.256329	0.00106079	0.0219322
ENSG00000248477	RP11-848G14.2	0.368976	0.00106658	0.0220298
ENSG00000129667	RHBDF2	0.237218	0.00106948	0.022053
ENSG00000251139	RP11-701P16.2	0.35481	0.00106982	0.022053
ENSG00000141086	CTRL	0.229247	0.00107882	0.0221955
ENSG00000170915	PAQR8	-0.190569	0.00107967	0.0221955
ENSG00000259531	RP11-295H24.3	0.364935	0.00107994	0.0221955
ENSG00000172888	ZNF621	0.231453	0.00108625	0.022303
ENSG00000151229	SLC2A13	0.302184	0.00109104	0.0223793
ENSG00000188229	TUBB4B	-0.147901	0.00109902	0.0225208
ENSG00000227543	SPAG5-AS1	-0.163099	0.00110327	0.0225854
ENSG00000067141	NEO1	-0.300082	0.00110842	0.0226686
ENSG00000163297	ANTXR2	-0.221369	0.00111254	0.022726
ENSG00000227908	CTD-2031P19.3	0.358581	0.00111342	0.022726
ENSG00000100014	SPECC1L	-0.187236	0.00111604	0.0227572
ENSG00000145014	TMEM44	0.28825	0.00111969	0.0228091
ENSG00000171928	FAM18B1	0.262843	0.00112934	0.0229832
ENSG00000166145	SPINT1	-0.28153	0.00113085	0.0229913
ENSG00000092964	DPYSL2	-0.228682	0.0011368	0.0230447
ENSG00000184005	ST6GALNAC3	0.301421	0.00113506	0.0230447
ENSG00000203666	EFCAB2	0.282754	0.00113625	0.0230447
ENSG00000111642	CHD4	-0.214145	0.00114061	0.0230909
ENSG00000144749	LRIG1	-0.208937	0.00114131	0.0230909
ENSG00000129355	CDKN2D	0.18307	0.0011434	0.0231106
ENSG00000211816	TRAV38-1	-0.361592	0.001145	0.0231205
ENSG00000166275	C10orf32	0.242937	0.00116802	0.0235624
ENSG00000109111	SUPT6H	-0.20122	0.00117065	0.0235805
ENSG00000155093	PTPRN2	0.298565	0.00117119	0.0235805
ENSG00000256349	BBS1	-0.151819	0.00117488	0.0236319
ENSG00000182934	SRPR	-0.179093	0.0011761	0.0236336
ENSG00000078369	GNB1	-0.160824	0.00118233	0.0237016
ENSG00000134516	DOCK2	-0.214077	0.00118291	0.0237016
ENSG00000185499	MUC1	0.33402	0.00118264	0.0237016
ENSG00000254826	CTD-2530H12.2	0.360232	0.0011945	0.0239108
ENSG00000174501	ANKRD36C	0.323343	0.00119568	0.0239114
ENSG00000166963	MAP1A	-0.31992	0.00119849	0.0239214
ENSG00000255200	AP003068.18	0.301299	0.0011976	0.0239214
ENSG00000006453	BAIAP2L1	0.293848	0.00121177	0.0241182
ENSG00000116815	CD58	0.206335	0.00120977	0.0241182
ENSG00000198814	GK	0.244467	0.00121184	0.0241182
ENSG00000100345	MYH9	-0.261064	0.00121751	0.024208
ENSG00000137193	PIM1	0.184317	0.00122293	0.0242924
ENSG00000101365	IDH3B	-0.145541	0.00122891	0.0243646
ENSG00000231025	RP11-175O19.4	-0.188812	0.00122842	0.0243646
ENSG00000157800	SLC37A3	0.265904	0.00123837	0.0245287
ENSG00000059758	CDK17	0.239191	0.00124171	0.0245715
ENSG00000143889	HNRPLL	0.202953	0.00125085	0.024666
ENSG00000155363	MOV10	0.303065	0.00125124	0.024666
ENSG00000188921	PTPLAD2	0.16842	0.00125106	0.024666
ENSG00000223907	RP11-439L8.4	-0.36112	0.00124881	0.024666
ENSG00000259924	RP11-16E23.4	0.367151	0.00125368	0.0246906
ENSG00000106105	GARS	-0.182641	0.00125967	0.0247619
ENSG00000135424	ITGA7	0.323401	0.00125969	0.0247619
ENSG00000205786	AC002511.1	0.349522	0.00126148	0.0247737
ENSG00000180061	TMEM150B	0.237549	0.00126374	0.0247946
ENSG00000229807	XIST	0.305709	0.00126974	0.0248889
ENSG00000159882	ZNF230	0.241469	0.00127425	0.0249537
ENSG00000157181	C1orf27	0.217816	0.00127637	0.0249716
ENSG00000006831	ADIPOR2	-0.118276	0.00128561	0.0250936
ENSG00000094804	CDC6	0.347412	0.00128986	0.0250936
ENSG00000112584	FAM120B	-0.191201	0.00128744	0.0250936
ENSG00000145920	CPLX2	-0.361993	0.0012895	0.0250936
ENSG00000164898	C7orf55	0.232468	0.001289	0.0250936
ENSG00000164961	KIAA0196	-0.156512	0.00128728	0.0250936
ENSG00000104892	KLC3	0.357365	0.00129273	0.025126
ENSG00000130559	CAMSAP1	-0.15917	0.00129548	0.0251558
ENSG00000213585	VDAC1	-0.185217	0.00130002	0.0252204
ENSG00000130054	FAM155B	0.346059	0.00130251	0.0252452
ENSG00000147894	C9orf72	0.253595	0.00131408	0.0254457
ENSG00000065150	IPO5	-0.164874	0.00132545	0.0256339
ENSG00000140853	NLRC5	0.207774	0.00132628	0.0256339
ENSG00000135655	USP15	0.213432	0.00132821	0.0256475
ENSG00000196312	HIATL2	0.305524	0.00133084	0.0256744
ENSG00000225205	AC093818.1	0.314573	0.00133286	0.0256893
ENSG00000174165	ZDHHC24	0.167634	0.00133618	0.0257295
ENSG00000131473	ACLY	-0.212539	0.00134324	0.0258415
ENSG00000175970	UNC119B	-0.150053	0.00134568	0.0258645
ENSG00000236824	BCYRN1	0.35328	0.00134785	0.0258823
ENSG00000136935	GOLGA1	-0.12739	0.00135624	0.0260192
ENSG00000173110	HSPA6	0.240114	0.00136243	0.0261139
ENSG00000135624	CCT7	-0.161251	0.00136401	0.0261201
ENSG00000103942	HOMER2	0.275331	0.00137633	0.0261629
ENSG00000143845	ETNK2	-0.29785	0.001372	0.0261629
ENSG00000173473	SMARCC1	-0.179653	0.00136994	0.0261629
ENSG00000181894	ZNF329	-0.191005	0.00137219	0.0261629
ENSG00000183735	TBK1	0.213777	0.00137372	0.0261629
ENSG00000197872	FAM49A	-0.215633	0.00137518	0.0261629
ENSG00000198692	EIF1AY	0.359699	0.00137613	0.0261629
ENSG00000265982	RP11-927P21.4	0.364461	0.00137282	0.0261629
ENSG00000168916	ZNF608	0.346334	0.00137899	0.0261895
ENSG00000174684	B3GNT1	-0.205713	0.00139068	0.0263874
ENSG00000116983	HPCAL4	-0.305335	0.00139276	0.0264026
ENSG00000106608	URGCP	-0.133897	0.00139787	0.0264479
ENSG00000134256	CD101	-0.301567	0.00140033	0.0264479
ENSG00000135525	MAP7	-0.315087	0.00140092	0.0264479
ENSG00000247627	MTND4P12	-0.341364	0.00140152	0.0264479
ENSG00000255557	RP11-770G2.2	0.351149	0.00139836	0.0264479
ENSG00000164024	METAP1	-0.14876	0.00141291	0.0266373
ENSG00000232450	RP4-730K3.3	0.337846	0.00141412	0.0266373
ENSG00000105639	JAK3	0.198196	0.00142365	0.0267925
ENSG00000105426	PTPRS	-0.29986	0.0014297	0.0268108
ENSG00000155629	PIK3AP1	0.208679	0.00142815	0.0268108
ENSG00000183784	C9orf66	0.244833	0.00142596	0.0268108
ENSG00000187091	PLCD1	-0.181409	0.00143108	0.0268108
ENSG00000198216	CACNA1E	0.314732	0.0014304	0.0268108
ENSG00000120949	TNFRSF8	-0.237416	0.00143903	0.0268965
ENSG00000227051	C14orf132	-0.358891	0.00143954	0.0268965
ENSG00000259379	RP11-925D8.5	0.34702	0.00143842	0.0268965
ENSG00000174749	C4orf32	0.232419	0.0014421	0.0269201
ENSG00000232815	RP11-764K9.2	0.295713	0.0014489	0.0270227
ENSG00000175550	DRAP1	0.248155	0.0014586	0.0271792
ENSG00000241772	AC092620.2	0.280347	0.00146339	0.027244
ENSG00000166747	AP1G1	-0.135158	0.0014675	0.0272901
ENSG00000173559	NABP1	0.200106	0.00146849	0.0272901
ENSG00000258832	KRT86	-0.334103	0.00147429	0.0273733
ENSG00000138035	PNPT1	0.303078	0.00147806	0.0274188
ENSG00000051382	PIK3CB	-0.179427	0.00148157	0.0274593
ENSG00000249160	RP11-1C1.5	0.362847	0.00148324	0.0274612
ENSG00000262902	RP11-750B16.1	0.330921	0.00148555	0.0274612
ENSG00000267163	AC084219.3	0.262025	0.00148564	0.0274612
ENSG00000227191	TRGC2	-0.27279	0.00148766	0.0274741
ENSG00000070190	DAPP1	0.2084	0.00149358	0.0275589
ENSG00000078804	TP53INP2	-0.28302	0.00149628	0.0275841
ENSG00000117091	CD48	0.251468	0.00149765	0.0275849
ENSG00000132394	EEFSEC	-0.158628	0.00149963	0.0275968
ENSG00000164074	C4orf29	0.173268	0.00150299	0.0276342
ENSG00000161204	ABCF3	-0.157937	0.00150581	0.0276418
ENSG00000224611	AC007919.18	0.348389	0.00150606	0.0276418
ENSG00000101084	C20orf24	0.172066	0.00151127	0.0277129
ENSG00000095627	TDRD1	-0.29629	0.00151368	0.0277325
ENSG00000025800	KPNA6	-0.0979776	0.00152031	0.0278294
ENSG00000213347	MXD3	0.179065	0.00152298	0.0278537
ENSG00000123338	NCKAP1L	-0.169689	0.00152858	0.0279316
ENSG00000198721	ECI2	-0.172567	0.00153061	0.027944
ENSG00000112031	MTRF1L	0.257161	0.00153794	0.0280532
ENSG00000142065	ZFP14	0.224925	0.00155824	0.0283736
ENSG00000254088	CTD-3083F21.5	0.360436	0.00155746	0.0283736
ENSG00000091986	CCDC80	-0.188143	0.00156237	0.028399
ENSG00000260898	ADPGK-AS1	0.248189	0.00156227	0.028399
ENSG00000073578	SDHA	-0.151533	0.00156497	0.0284116
ENSG00000173451	THAP2	0.194925	0.0015658	0.0284116
ENSG00000100604	CHGA	0.34908	0.00156745	0.0284168
ENSG00000181291	TMEM132E	-0.35779	0.00157264	0.0284858
ENSG00000101361	NOP56	-0.146369	0.00158012	0.0285715
ENSG00000163565	IFI16	0.239751	0.00158008	0.0285715
ENSG00000185990	F8A3	0.34423	0.00158619	0.0286563
ENSG00000211721	TRBV6-5	-0.29401	0.0015885	0.0286711
ENSG00000236184	TCEA1P4	0.356733	0.00158977	0.0286711
ENSG00000144668	ITGA9	0.357884	0.00159538	0.0286974
ENSG00000152463	OLAH	0.342161	0.00159422	0.0286974
ENSG00000198938	MT-CO3	-0.242623	0.00159498	0.0286974
ENSG00000073849	ST6GAL1	-0.151154	0.0016012	0.0287069
ENSG00000125826	RBCK1	0.215482	0.00160144	0.0287069
ENSG00000163913	IFT122	-0.161791	0.00159734	0.0287069
ENSG00000198087	CD2AP	0.247102	0.00160097	0.0287069
ENSG00000108270	AATF	-0.184365	0.0016076	0.0287639
ENSG00000117139	KDM5B	-0.20173	0.00161016	0.0287639
ENSG00000224281	SLC25A5-AS1	-0.191907	0.00160997	0.0287639
ENSG00000267458	CTC-425F1.4	-0.198674	0.00160843	0.0287639
ENSG00000147206	NXF3	0.305027	0.00162056	0.0289248
ENSG00000053371	AKR7A2	-0.1728	0.00162666	0.0289808
ENSG00000101307	SIRPB1	-0.241024	0.00163207	0.0289808
ENSG00000102900	NUP93	-0.19701	0.00162975	0.0289808
ENSG00000149262	INTS4	-0.1364	0.00163071	0.0289808
ENSG00000166432	ZMAT1	0.293926	0.00163182	0.0289808
ENSG00000218357	LL22NC03-75H12.2	-0.351896	0.00162981	0.0289808
ENSG00000248044	CTD-2653M23.2	0.290732	0.00163701	0.0290436
ENSG00000068793	CYFIP1	-0.191199	0.00164982	0.0291962
ENSG00000166165	CKB	-0.326555	0.00164791	0.0291962
ENSG00000177283	FZD8	-0.346799	0.00164983	0.0291962
ENSG00000240694	PNMA2	0.322415	0.00165419	0.0291988
ENSG00000254750	CASP1P2	0.351481	0.00165303	0.0291988
ENSG00000259529	RNF31	0.207594	0.0016522	0.0291988
ENSG00000030066	NUP160	-0.153165	0.00166453	0.0293562
ENSG00000135480	KRT7	0.356424	0.0016739	0.029454
ENSG00000136783	NIPSNAP3A	0.255999	0.00167433	0.029454
ENSG00000177688	SUMO4	0.352811	0.00167374	0.029454
ENSG00000260336	RP11-395B7.7	0.230637	0.0016782	0.029497
ENSG00000012963	UBR7	-0.134739	0.00168295	0.0295556
ENSG00000120708	TGFBI	-0.266807	0.00169284	0.0297041
ENSG00000130985	UBA1	-0.210004	0.00169974	0.0297748
ENSG00000144043	TEX261	-0.106783	0.00169941	0.0297748
ENSG00000148110	HIATL1	0.205777	0.00170188	0.0297871
ENSG00000163512	AZI2	0.2128	0.00171386	0.0299589
ENSG00000198899	MT-ATP6	-0.259549	0.00171458	0.0299589
ENSG00000122862	SRGN	0.259219	0.00171931	0.0300093
ENSG00000182405	PGBD4	0.266145	0.00172035	0.0300093
ENSG00000023572	GLRX2	0.226842	0.00172603	0.0300723
ENSG00000262703	RP11-485G7.6	0.35605	0.00172686	0.0300723
ENSG00000110848	CD69	0.31236	0.00173005	0.0301026
ENSG00000197697	HIST1H2BE	0.356388	0.00173829	0.0302187
ENSG00000221792	MIR1282	0.291365	0.00174109	0.0302187
ENSG00000263986	RP11-746M1.1	-0.168905	0.00174073	0.0302187
ENSG00000169193	CCDC126	0.239808	0.0017451	0.0302631
ENSG00000187775	DNAH17	0.280042	0.00175033	0.0303284
ENSG00000066651	TRMT11	0.269683	0.00175736	0.0303742
ENSG00000072958	AP1M1	-0.160358	0.00175713	0.0303742
ENSG00000196247	ZNF107	0.27976	0.00175668	0.0303742
ENSG00000223609	HBD	0.353306	0.00176108	0.0304007
ENSG00000233902	XXbac-BPG181B23.6	0.352147	0.00176193	0.0304007
ENSG00000264769	RP11-498C9.12	0.319603	0.00176329	0.0304007
ENSG00000152642	GPD1L	-0.178186	0.00178341	0.0306754
ENSG00000172493	AFF1	0.185604	0.00178366	0.0306754
ENSG00000181856	SLC2A4	0.335418	0.00178133	0.0306754
ENSG00000170027	YWHAG	-0.180447	0.00178639	0.0306969
ENSG00000226608	FTLP3	0.164142	0.00179845	0.0308786
ENSG00000260565	ERVK13-1	0.203362	0.00180074	0.0308923
ENSG00000256039	RP11-291B21.2	0.320817	0.00180835	0.0309973
ENSG00000090530	LEPREL1	-0.351805	0.0018126	0.0310301
ENSG00000206249	CTD-2308N23.2	0.325893	0.00181325	0.0310301
ENSG00000174099	MSRB3	0.29935	0.00181587	0.0310492
ENSG00000111665	CDCA3	0.34564	0.00182972	0.0311834
ENSG00000186417	GLDN	0.284995	0.00182798	0.0311834
ENSG00000236493	EIF2S2P3	0.355008	0.00182835	0.0311834
ENSG00000236525	AC007278.2	0.341718	0.001828	0.0311834
ENSG00000031081	ARHGAP31	-0.233162	0.00183575	0.0311838
ENSG00000122783	C7orf49	0.208256	0.00183452	0.0311838
ENSG00000134369	NAV1	-0.228059	0.00183344	0.0311838
ENSG00000142687	KIAA0319L	0.236235	0.00183533	0.0311838
ENSG00000166479	TMX3	0.267699	0.00183979	0.0312267
ENSG00000115392	FANCL	0.249265	0.00184466	0.0312839
ENSG00000267430	RP11-635N19.2	0.352167	0.00184959	0.0313418
ENSG00000173890	GPR160	0.269704	0.00185552	0.0314168
ENSG00000178035	IMPDH2	-0.130922	0.00185827	0.0314377
ENSG00000253701	AL928768.3	-0.349927	0.00186266	0.0314862
ENSG00000179218	CALR	-0.164979	0.00186607	0.0315182
ENSG00000153107	ANAPC1	-0.197814	0.0018688	0.0315387
ENSG00000137843	PAK6	-0.309826	0.00187884	0.0316824
ENSG00000107077	KDM4C	-0.140384	0.00188658	0.031787
ENSG00000269053	CTD-2521M24.8	0.33144	0.00189764	0.0319475
ENSG00000139644	TMBIM6	-0.156529	0.00190261	0.0320052
ENSG00000112425	EPM2A	-0.221371	0.00191932	0.0321882
ENSG00000204389	HSPA1A	-0.234806	0.0019212	0.0321882
ENSG00000248881	CTC-366B18.2	0.274937	0.00192007	0.0321882
ENSG00000251288	RP11-10L12.2	0.344554	0.00191553	0.0321882
ENSG00000267102	RP11-686D22.7	0.306027	0.00192125	0.0321882
ENSG00000109320	NFKB1	-0.170459	0.00192527	0.0322297
ENSG00000173221	GLRX	0.235428	0.00193515	0.032369
ENSG00000143303	RRNAD1	0.151367	0.00194267	0.0324686
ENSG00000121210	KIAA0922	-0.147406	0.00194827	0.0324912
ENSG00000203583	AL021707.1	0.22406	0.00194872	0.0324912
ENSG00000211899	IGHM	-0.345319	0.00194601	0.0324912
ENSG00000172893	DHCR7	-0.25766	0.00196504	0.032737
ENSG00000124508	BTN2A2	0.216579	0.00196698	0.032743
ENSG00000167705	RILP	0.242801	0.00197178	0.0327442
ENSG00000225331	AP001055.6	0.268639	0.00196937	0.0327442
ENSG00000268310	AC087645.1	0.351291	0.00197173	0.0327442
ENSG00000100129	EIF3L	-0.193208	0.00197464	0.0327655
ENSG00000198959	TGM2	0.315491	0.00197878	0.0328079
ENSG00000087157	PGS1	0.231269	0.00198922	0.0329548
ENSG00000009307	CSDE1	-0.136834	0.00199622	0.0330308
ENSG00000180855	ZNF443	0.298558	0.001997	0.0330308
ENSG00000141452	C18orf8	-0.137709	0.00200378	0.0331166
ENSG00000164187	LMBRD2	0.247764	0.00200851	0.0331419
ENSG00000183260	ABHD16B	0.184246	0.00200699	0.0331419
ENSG00000235908	RHOA-IT1	0.336205	0.00202346	0.0333622
ENSG00000198951	NAGA	-0.188488	0.00202829	0.0334153
ENSG00000018408	WWTR1	-0.34809	0.00203384	0.0334801
ENSG00000228906	RP13-216E22.4	0.336337	0.00203797	0.0335216
ENSG00000108106	UBE2S	0.252978	0.00204045	0.0335358
ENSG00000112118	MCM3	-0.200451	0.00204552	0.0335659
ENSG00000188820	FAM26F	0.327443	0.00204479	0.0335659
ENSG00000112195	TREML2	0.185301	0.00205685	0.0336986
ENSG00000267046	RP11-1094M14.9	0.302076	0.00205662	0.0336986
ENSG00000254676	RP11-727A23.4	0.276168	0.00205858	0.0337003
ENSG00000085377	PREP	-0.13854	0.00206915	0.0338466
ENSG00000125740	FOSB	-0.312482	0.00207523	0.0339194
ENSG00000215811	BTNL10	0.338168	0.00207751	0.0339299
ENSG00000116127	ALMS1	-0.196833	0.00208209	0.0339781
ENSG00000161570	CCL5	-0.219504	0.00208499	0.0339986
ENSG00000080546	SESN1	-0.220935	0.00208874	0.034033
ENSG00000215154	AC141586.5	0.283725	0.00209313	0.0340779
ENSG00000135604	STX11	0.208885	0.00211787	0.0344536
ENSG00000232220	AC008440.5	-0.26885	0.0021225	0.0345019
ENSG00000173212	MAB21L3	0.347789	0.00212543	0.0345224
ENSG00000165102	HGSNAT	-0.163359	0.00213807	0.034683
ENSG00000177173	NAP1L4P1	0.330202	0.00213866	0.034683
ENSG00000163683	C4orf34	0.170186	0.00214475	0.0347275
ENSG00000196747	HIST1H2AI	0.325697	0.00214336	0.0347275
ENSG00000261716	RP11-196G18.22	0.216838	0.00215505	0.0348672
ENSG00000236882	C5orf27	0.345822	0.00216422	0.0349882
ENSG00000140534	TICRR	0.348269	0.00216966	0.035049
ENSG00000260804	RP11-566E18.3	-0.1981	0.00217304	0.0350762
ENSG00000257808	RP11-1136G11.8	0.26399	0.00217519	0.0350836
ENSG00000100918	REC8	0.261533	0.00217887	0.0351156
ENSG00000133026	MYH10	0.251467	0.00218346	0.0351624
ENSG00000136811	ODF2	-0.132583	0.00218861	0.035218
ENSG00000128000	ZNF780B	0.229571	0.00219804	0.0353422
ENSG00000107371	EXOSC3	0.172785	0.00220616	0.0353906
ENSG00000119711	ALDH6A1	-0.202425	0.00220441	0.0353906
ENSG00000133731	IMPA1	0.235583	0.0022055	0.0353906
ENSG00000114423	CBLB	-0.162466	0.00221035	0.0354304
ENSG00000112640	PPP2R5D	-0.142491	0.0022135	0.0354535
ENSG00000167004	PDIA3	-0.186105	0.00221694	0.0354813
ENSG00000143774	GUK1	0.21948	0.00222074	0.0354874
ENSG00000145675	PIK3R1	-0.173658	0.00221934	0.0354874
ENSG00000101310	SEC23B	-0.173994	0.00223097	0.035596
ENSG00000142173	COL6A2	-0.283741	0.00222944	0.035596
ENSG00000115211	EIF2B4	-0.139532	0.00223359	0.0356105
ENSG00000019582	CD74	-0.199792	0.00224092	0.0356725
ENSG00000162873	KLHDC8A	0.347304	0.00223985	0.0356725
ENSG00000025708	TYMP	0.243664	0.00226372	0.0359804
ENSG00000143570	SLC39A1	0.140871	0.00226342	0.0359804
ENSG00000121691	CAT	-0.259897	0.00226698	0.0360046
ENSG00000109674	NEIL3	0.3439	0.00227528	0.0360762
ENSG00000196550	FAM72A	0.343568	0.00227636	0.0360762
ENSG00000230454	U73166.2	0.297437	0.0022767	0.0360762
ENSG00000124208	TMEM189-UBE2V1	-0.111919	0.00227882	0.0360822
ENSG00000013503	POLR3B	-0.212483	0.00228924	0.0361783
ENSG00000100227	POLDIP3	-0.109832	0.00228871	0.0361783
ENSG00000129596	CDO1	0.272165	0.00229055	0.0361783
ENSG00000163125	RPRD2	-0.194619	0.00229186	0.0361783
ENSG00000089505	CMTM1	0.265671	0.00229806	0.0362486
ENSG00000106799	TGFBR1	0.204629	0.00230298	0.0362987
ENSG00000227345	PARG	-0.179882	0.0023057	0.036314
ENSG00000218073	RP1-13D10.2	0.33731	0.00230993	0.036353
ENSG00000108950	FAM20A	0.26088	0.00232083	0.0364141
ENSG00000156471	PTDSS1	-0.134848	0.00231859	0.0364141
ENSG00000170837	GPR27	0.227854	0.00231961	0.0364141
ENSG00000180992	MRPL14	0.229232	0.00231964	0.0364141
ENSG00000235499	AC073046.25	0.311619	0.0023303	0.036535
ENSG00000069329	VPS35	-0.158837	0.00234141	0.0366263
ENSG00000110057	UNC93B1	0.249588	0.00234142	0.0366263
ENSG00000138434	SSFA2	0.181528	0.00233898	0.0366263
ENSG00000105732	ZNF574	-0.190644	0.00235211	0.036683
ENSG00000112773	FAM46A	0.226612	0.00235073	0.036683
ENSG00000226321	AC104809.3	-0.344743	0.00234731	0.036683
ENSG00000233404	FLJ20373	-0.146549	0.00235017	0.036683
ENSG00000234073	AC011816.1	0.334399	0.00235763	0.0367415
ENSG00000264895	RP11-421E14.2	0.338144	0.00236011	0.0367526
ENSG00000105701	FKBP8	0.259677	0.00236664	0.0367734
ENSG00000131467	PSME3	-0.149228	0.0023658	0.0367734
ENSG00000137460	FHDC1	0.31326	0.00236676	0.0367734
ENSG00000249790	RP11-20D14.6	0.345162	0.00236881	0.0367777
ENSG00000158201	ABHD3	0.196972	0.00239149	0.0370744
ENSG00000164327	RICTOR	0.221441	0.00239133	0.0370744
ENSG00000149269	PAK1	-0.162487	0.00240396	0.0372221
ENSG00000163754	GYG1	0.234032	0.00240461	0.0372221
ENSG00000105953	OGDH	-0.192285	0.00241085	0.0372676
ENSG00000213139	CRYGS	-0.219956	0.00241114	0.0372676
ENSG00000205269	TMEM170B	0.248124	0.00241767	0.0373408
ENSG00000253276	CCDC71L	0.248004	0.00242672	0.0374528
ENSG00000143552	NUP210L	0.33946	0.00244134	0.0376503
ENSG00000214548	MEG3	-0.336469	0.00245309	0.0377754
ENSG00000234484	RP1-55C23.7	0.237615	0.00245205	0.0377754
ENSG00000267702	RP11-53B2.2	0.255755	0.00245701	0.0378077
ENSG00000051620	HEBP2	0.217235	0.00245984	0.0378232
ENSG00000145337	PYURF	0.201103	0.00246245	0.0378353
ENSG00000123836	PFKFB2	0.288688	0.00246531	0.0378513
ENSG00000156535	CD109	0.332725	0.00247472	0.0379676
ENSG00000112305	SMAP1	-0.14545	0.00247928	0.0380095
ENSG00000165025	SYK	-0.187882	0.00248362	0.038048
ENSG00000119318	RAD23B	-0.163073	0.00250317	0.0382006
ENSG00000130340	SNX9	-0.162877	0.00250428	0.0382006
ENSG00000139908	TSSK4	0.267621	0.0025041	0.0382006
ENSG00000163535	SGOL2	0.322053	0.00249976	0.0382006
ENSG00000221890	NPTXR	-0.269659	0.00249558	0.0382006
ENSG00000240368	AP000304.2	-0.266066	0.00250463	0.0382006
ENSG00000132256	TRIM5	0.257801	0.00251726	0.0383088
ENSG00000133116	KL	0.33758	0.00251678	0.0383088
ENSG00000138185	ENTPD1	0.159138	0.00251608	0.0383088
ENSG00000116337	AMPD2	-0.242939	0.00252101	0.0383378
ENSG00000124160	NCOA5	-0.134232	0.00252733	0.0383522
ENSG00000134627	PIWIL4	0.28741	0.00252462	0.0383522
ENSG00000164070	HSPA4L	0.318255	0.00252877	0.0383522
ENSG00000244480	AC005154.7	0.199865	0.00253119	0.0383522
ENSG00000267987	AL161784.1	0.289377	0.00253111	0.0383522
ENSG00000100523	DDHD1	0.174625	0.00254447	0.0385253
ENSG00000124571	XPO5	-0.141929	0.002549	0.0385658
ENSG00000155849	ELMO1	-0.210223	0.00255543	0.0386292
ENSG00000214189	ZNF788	0.315017	0.00255692	0.0386292
ENSG00000170525	PFKFB3	0.286473	0.00257007	0.0387996
ENSG00000130734	ATG4D	0.138169	0.00257479	0.0388427
ENSG00000122483	CCDC18	0.218382	0.00257717	0.0388503
ENSG00000260208	CTD-2270L9.5	-0.184728	0.00257916	0.0388521
ENSG00000127951	FGL2	0.195067	0.00258359	0.0388907
ENSG00000257594	GALNT4	0.223723	0.00259031	0.0389635
ENSG00000250264	TAP2	0.235823	0.00259371	0.0389863
ENSG00000197102	DYNC1H1	-0.177563	0.00260402	0.0391131
ENSG00000129757	CDKN1C	-0.330597	0.00260905	0.0391603
ENSG00000100941	PNN	0.213766	0.00261956	0.0392896
ENSG00000101224	CDC25B	-0.149287	0.00263783	0.0393967
ENSG00000139826	ABHD13	0.236825	0.0026333	0.0393967
ENSG00000158481	CD1C	-0.297155	0.0026326	0.0393967
ENSG00000163644	PPM1K	0.25476	0.0026373	0.0393967
ENSG00000164236	ANKRD33B	0.340858	0.00263809	0.0393967
ENSG00000254680	RP11-265D17.2	-0.252671	0.00263722	0.0393967
ENSG00000150681	RGS18	0.274222	0.00264574	0.0394825
ENSG00000100109	TFIP11	-0.203839	0.00264995	0.0394887
ENSG00000204277	RP11-219G17.4	0.341256	0.00264883	0.0394887
ENSG00000173621	LRFN4	0.239696	0.00266291	0.0396534
ENSG00000213949	ITGA1	0.284587	0.00266733	0.0396873
ENSG00000224295	AC087380.14	0.336467	0.00266902	0.0396873
ENSG00000259075	POC1B-GALNT4	0.220218	0.00267235	0.0397084
ENSG00000183111	ARHGEF37	0.340394	0.00267728	0.0397532
ENSG00000250615	CTC-564N23.2	-0.322187	0.00268364	0.0398192
ENSG00000155660	PDIA4	-0.200303	0.00269537	0.0399647
ENSG00000118193	KIF14	0.339349	0.00270403	0.0400146
ENSG00000185909	KLHDC8B	0.306936	0.00270709	0.0400146
ENSG00000205846	CLEC6A	0.334987	0.00270838	0.0400146
ENSG00000228782	MRPL45P2	0.294675	0.00270263	0.0400146
ENSG00000257949	TEN1	0.180958	0.00270676	0.0400146
ENSG00000084234	APLP2	-0.211659	0.00272341	0.0400371
ENSG00000104472	CHRAC1	-0.129657	0.00272256	0.0400371
ENSG00000123080	CDKN2C	0.25399	0.00272328	0.0400371
ENSG00000127074	RGS13	0.278429	0.00271794	0.0400371
ENSG00000156475	PPP2R2B	-0.258386	0.00271549	0.0400371
ENSG00000165480	SKA3	0.339342	0.00271708	0.0400371
ENSG00000180758	GPR157	-0.251841	0.00271981	0.0400371
ENSG00000140280	LYSMD2	0.178231	0.00272726	0.0400654
ENSG00000115652	UXS1	-0.14605	0.00273404	0.0401366
ENSG00000168876	ANKRD49	0.250764	0.00273888	0.0401608
ENSG00000199916	RMRP	0.327653	0.00273955	0.0401608
ENSG00000258515	RP11-203M5.7	-0.271201	0.00274493	0.0402112
ENSG00000213204	C6orf165	0.260079	0.00275134	0.0402766
ENSG00000129675	ARHGEF6	-0.135625	0.00275442	0.0402933
ENSG00000151623	NR3C2	-0.221754	0.00276961	0.040487
ENSG00000258745	RP11-218E20.5	-0.22425	0.00278531	0.0406592
ENSG00000261471	RP11-61F12.1	0.226999	0.00278361	0.0406592
ENSG00000145191	EIF2B5	-0.104822	0.00279326	0.0407466
ENSG00000241627	UBQLN4P1	-0.221404	0.00280033	0.0408211
ENSG00000129353	SLC44A2	-0.192146	0.00280776	0.0409007
ENSG00000072954	TMEM38A	0.241977	0.00281363	0.0409011
ENSG00000090863	GLG1	-0.187419	0.0028137	0.0409011
ENSG00000234511	C5orf58	0.199858	0.0028137	0.0409011
ENSG00000017373	SRCIN1	0.329836	0.00281999	0.0409639
ENSG00000157693	C9orf91	0.208579	0.00282304	0.0409795
ENSG00000172660	TAF15	-0.181576	0.00282614	0.0409958
ENSG00000236698	EIF1AXP1	0.224512	0.00283094	0.0410291
ENSG00000269069	CTC-471F3.5	0.332402	0.00283238	0.0410291
ENSG00000143479	DYRK3	0.338466	0.0028363	0.0410571
ENSG00000118985	ELL2	0.232205	0.0028418	0.041108
ENSG00000122741	DCAF10	0.159299	0.00284639	0.0411457
ENSG00000183734	ASCL2	0.237199	0.00285265	0.0412076
ENSG00000228703	RP5-1160K1.6	-0.242248	0.00285465	0.0412079
ENSG00000099204	ABLIM1	-0.207085	0.00286263	0.0412943
ENSG00000072062	PRKACA	-0.191969	0.00287165	0.0413957
ENSG00000089022	MAPKAPK5	0.120458	0.00288184	0.0414849
ENSG00000143228	NUF2	0.338382	0.00288074	0.0414849
ENSG00000255337	RP11-315O6.1	0.337354	0.00289063	0.0415826
ENSG00000156127	BATF	0.233013	0.00289619	0.0416337
ENSG00000182472	CAPN12	-0.226988	0.00290587	0.0417439
ENSG00000230069	LRRC37A15P	0.311405	0.00291137	0.041794
ENSG00000250318	CTA-963H5.5	0.277604	0.00291703	0.0418464
ENSG00000184613	NELL2	-0.233399	0.00292411	0.041919
ENSG00000135976	ANKRD36	0.259062	0.00293045	0.0419809
ENSG00000179294	C17orf96	0.31045	0.00293267	0.0419837
ENSG00000106785	TRIM14	0.224331	0.00295621	0.0422915
ENSG00000118412	CASP8AP2	0.214844	0.00296237	0.0423504
ENSG00000167600	CYP2S1	-0.296761	0.00296931	0.0424204
ENSG00000230262	MIRLET7DHG	0.251768	0.0029718	0.0424268
ENSG00000131459	GFPT2	-0.333678	0.00297634	0.0424624
ENSG00000132604	TERF2	-0.171479	0.00298508	0.0424704
ENSG00000135205	CCDC146	0.240826	0.00298475	0.0424704
ENSG00000236935	AP003774.1	0.320479	0.00298185	0.0424704
ENSG00000266970	RP11-806H10.4	0.335046	0.00297946	0.0424704
ENSG00000135966	TGFBRAP1	-0.121342	0.00299464	0.0425773
ENSG00000184349	EFNA5	-0.336161	0.00300234	0.0426468
ENSG00000228166	MTND1P11	0.319981	0.00300364	0.0426468
ENSG00000100077	ADRBK2	-0.180328	0.00301145	0.0427285
ENSG00000186318	BACE1	-0.171605	0.00301913	0.0428081
ENSG00000005882	PDK2	-0.160956	0.00302468	0.0428155
ENSG00000165029	ABCA1	0.270672	0.00302584	0.0428155
ENSG00000256525	POLG2	0.144423	0.00302353	0.0428155
ENSG00000240487	RP11-553L6.3	0.337058	0.00303491	0.0429146
ENSG00000105186	ANKRD27	-0.13336	0.00304464	0.0430229
ENSG00000267387	CTD-2240E14.4	0.265303	0.00306145	0.043231
ENSG00000163686	ABHD6	-0.194413	0.00307422	0.0433405
ENSG00000164626	KCNK5	0.326068	0.00307239	0.0433405
ENSG00000188649	CC2D2B	0.301129	0.00307546	0.0433405
ENSG00000054267	ARID4B	0.182457	0.00307936	0.0433416
ENSG00000106263	EIF3B	-0.141632	0.00307972	0.0433416
ENSG00000179862	CITED4	0.290912	0.00308209	0.0433456
ENSG00000021355	SERPINB1	0.191541	0.00308574	0.0433675
ENSG00000169174	PCSK9	0.233965	0.0030985	0.0435174
ENSG00000183655	KLHL25	-0.182228	0.00310318	0.0435536
ENSG00000182463	TSHZ2	-0.287029	0.0031053	0.0435539
ENSG00000118596	SLC16A7	0.265703	0.00311167	0.0435867
ENSG00000138614	VWA9	-0.141789	0.00311184	0.0435867
ENSG00000020256	ZFP64	-0.170236	0.00311408	0.0435888
ENSG00000164136	IL15	0.225779	0.00312063	0.0436509
ENSG00000206337	HCP5	0.167176	0.00312763	0.0437194
ENSG00000175800	OR52B3P	0.337179	0.00313544	0.0437693
ENSG00000180747	CTD-2547E10.2	0.250486	0.00313707	0.0437693
ENSG00000238000	RP11-274E7.2	0.248594	0.00313752	0.0437693
ENSG00000158417	EIF5B	-0.186732	0.00314045	0.0437737
ENSG00000197779	ZNF81	0.213459	0.00314206	0.0437737
ENSG00000265787	CYP4F35P	-0.295048	0.00314948	0.0438477
ENSG00000111052	LIN7A	0.21975	0.00315285	0.0438652
ENSG00000112339	HBS1L	0.168097	0.00315782	0.0439049
ENSG00000137200	FTSJD2	0.234296	0.00316981	0.0440127
ENSG00000169877	AHSP	0.33368	0.00316823	0.0440127
ENSG00000112062	MAPK14	0.174337	0.00317635	0.0440446
ENSG00000132963	POMP	0.1982	0.00317425	0.0440446
ENSG00000163219	ARHGAP25	-0.205783	0.00318287	0.0441055
ENSG00000090432	MUL1	-0.148769	0.00319133	0.0441535
ENSG00000111674	ENO2	-0.154668	0.00319272	0.0441535
ENSG00000247853	RP5-940J5.6	-0.179069	0.00319264	0.0441535
ENSG00000101294	HM13	-0.150228	0.00320654	0.0443151
ENSG00000182853	VMO1	-0.334497	0.0032093	0.0443238
ENSG00000147138	GPR174	0.258024	0.00323649	0.0446488
ENSG00000177370	TIMM22	-0.134869	0.00323713	0.0446488
ENSG00000136709	WDR33	-0.086067	0.00324191	0.044685
ENSG00000164708	PGAM2	0.247364	0.00324666	0.0447208
ENSG00000244687	UBE2V1	-0.116433	0.00325463	0.0448008
ENSG00000183250	C21orf67	0.231095	0.00326308	0.0448467
ENSG00000187475	HIST1H1T	0.334759	0.00326661	0.0448467
ENSG00000196295	AC005154.6	0.151632	0.00326192	0.0448467
ENSG00000234857	RP11-831H9.16	-0.187119	0.0032651	0.0448467
ENSG00000133835	HSD17B4	-0.187381	0.00327481	0.0449295
ENSG00000106460	TMEM106B	0.214343	0.00329574	0.0451868
ENSG00000207561	MIR635	0.323069	0.00330448	0.0452768
ENSG00000187741	FANCA	0.159605	0.00332047	0.045462
ENSG00000246250	RP11-613D13.5	0.334052	0.00332237	0.045462
ENSG00000174776	WDR49	0.334816	0.00333242	0.0455694
ENSG00000101193	GID8	-0.114247	0.00333716	0.0456042
ENSG00000107863	ARHGAP21	-0.2299	0.00334223	0.0456192
ENSG00000134444	KIAA1468	0.186296	0.00335015	0.0456192
ENSG00000139719	VPS33A	-0.125589	0.00335001	0.0456192
ENSG00000237568	RP4-620F22.2	0.320254	0.00334816	0.0456192
ENSG00000241886	RP11-242C19.2	0.287647	0.00335145	0.0456192
ENSG00000246430	RP11-16M8.2	0.314003	0.00334568	0.0456192
ENSG00000103381	CPPED1	-0.219181	0.00336217	0.0457352
ENSG00000186141	POLR3C	-0.123416	0.00337297	0.0458521
ENSG00000110955	ATP5B	-0.122359	0.00338072	0.0459273
ENSG00000198804	MT-CO1	-0.296736	0.00339067	0.0460324
ENSG00000244754	N4BP2L2	0.161597	0.00339444	0.0460535
ENSG00000112245	PTP4A1	0.200043	0.00339879	0.0460824
ENSG00000011201	KAL1	0.315243	0.00341764	0.0460971
ENSG00000102174	PHEX	-0.320574	0.00341708	0.0460971
ENSG00000128512	DOCK4	0.259045	0.00341586	0.0460971
ENSG00000137801	THBS1	-0.331151	0.00341739	0.0460971
ENSG00000144655	CSRNP1	0.244936	0.00340906	0.0460971
ENSG00000188474	ZNF788	0.315415	0.00340855	0.0460971
ENSG00000204267	TAP2	0.216712	0.00341005	0.0460971
ENSG00000243989	ACY1	-0.158798	0.00341612	0.0460971
ENSG00000163635	ATXN7	0.181075	0.00342101	0.0461125
ENSG00000179152	TCAIM	0.181096	0.00342325	0.0461128
ENSG00000146859	TMEM140	0.231138	0.00342635	0.0461246
ENSG00000085449	WDFY1	0.198711	0.00343117	0.0461297
ENSG00000123728	RAP2C	0.178259	0.00342925	0.0461297
ENSG00000107745	MICU1	-0.176655	0.00345431	0.0463405
ENSG00000108786	HSD17B1	0.158849	0.00345541	0.0463405
ENSG00000144218	AFF3	-0.252349	0.00345578	0.0463405
ENSG00000241721	SUMO1P1	0.332242	0.00344909	0.0463405
ENSG00000130584	ZBTB46	-0.201634	0.00346432	0.0464066
ENSG00000171320	ESCO2	0.33144	0.00346826	0.0464066
ENSG00000228253	MT-ATP8	-0.244105	0.0034671	0.0464066
ENSG00000228313	AL160314.1	0.32416	0.00346965	0.0464066
ENSG00000189423	USP32P3	0.33257	0.00347371	0.0464309
ENSG00000132514	CLEC10A	-0.298927	0.00347703	0.0464455
ENSG00000135919	SERPINE2	-0.311861	0.00348934	0.04652
ENSG00000170962	PDGFD	-0.2694	0.00348812	0.04652
ENSG00000211820	TRAV41	-0.289632	0.0034866	0.04652
ENSG00000158623	COPG2	-0.222728	0.0035069	0.0467242
ENSG00000099783	HNRNPM	-0.129616	0.00352741	0.0469672
ENSG00000084652	TXLNA	-0.113895	0.00354097	0.0470563
ENSG00000126016	AMOT	-0.249847	0.00354711	0.0470563
ENSG00000143612	C1orf43	0.121877	0.0035477	0.0470563
ENSG00000155792	DEPTOR	-0.29465	0.00353981	0.0470563
ENSG00000168522	FNTA	0.123228	0.00354417	0.0470563
ENSG00000204791	CTD-3065J16.6	0.31949	0.00354753	0.0470563
ENSG00000074181	NOTCH3	-0.330498	0.00355556	0.0471304
ENSG00000184992	BRI3BP	-0.221507	0.0035675	0.0472586
ENSG00000183624	C3orf37	-0.125649	0.00357355	0.0473085
ENSG00000169026	MFSD7	0.2193	0.0035781	0.0473386
ENSG00000251562	MALAT1	0.195605	0.00358449	0.0473929
ENSG00000129467	ADCY4	0.21094	0.00359292	0.0474741
ENSG00000139970	RTN1	-0.286864	0.00359893	0.0475232
ENSG00000235316	RP11-574K11.20	0.262223	0.00360345	0.0475526
ENSG00000101413	RPRD1B	-0.157206	0.00360991	0.0476077
ENSG00000116793	PHTF1	0.189648	0.00361752	0.0476703
ENSG00000166685	COG1	-0.12303	0.00362154	0.0476703
ENSG00000269290	RP11-869B15.1	-0.232998	0.00362006	0.0476703
ENSG00000205045	SLFN12L	0.23964	0.00362834	0.0477294
ENSG00000113194	FAF2	-0.120417	0.00363333	0.0477577
ENSG00000127804	METTL16	-0.148649	0.00363509	0.0477577
ENSG00000268083	AC104534.3	-0.0987081	0.00364455	0.0478517
ENSG00000183696	UPP1	0.199978	0.00365336	0.0479371
ENSG00000142409	ZNF787	0.165226	0.00366188	0.0480185
ENSG00000135821	GLUL	-0.199776	0.00367385	0.048145
ENSG00000197956	S100A6	0.187145	0.00368144	0.0482142
ENSG00000131153	GINS2	0.3115	0.00369233	0.0483262
ENSG00000109854	HTATIP2	0.136425	0.00370243	0.0484279
ENSG00000236567	RP11-39K24.7	0.330617	0.0037051	0.0484323
ENSG00000155561	NUP205	-0.150766	0.00371539	0.0485363
ENSG00000110492	MDK	0.297173	0.00372054	0.048573
ENSG00000174469	CNTNAP2	-0.325063	0.0037332	0.048677
ENSG00000182149	IST1	-0.127552	0.00373238	0.048677
ENSG00000112624	KIAA0240	-0.1993	0.0037367	0.048692
ENSG00000134242	PTPN22	0.205886	0.00373911	0.0486928
ENSG00000162399	BSND	0.297236	0.00375311	0.0488393
ENSG00000242525	OR7E100P	0.328865	0.00375506	0.0488393
ENSG00000181634	TNFSF15	0.325815	0.00375742	0.0488394
ENSG00000132286	FXC1	-0.106682	0.00377778	0.0490733
ENSG00000143162	CREG1	0.19737	0.00378124	0.0490875
ENSG00000011304	PTBP1	-0.127763	0.0037905	0.049177
ENSG00000214212	C19orf38	0.152015	0.00380429	0.0493251
ENSG00000177674	AGTRAP	0.153626	0.00380867	0.049351
ENSG00000185275	CD24P4	0.327196	0.00381229	0.0493672
ENSG00000181804	SLC9A9	-0.168919	0.00382158	0.0494566
ENSG00000011376	LARS2	-0.134521	0.00382945	0.0494735
ENSG00000144290	SLC4A10	-0.324617	0.00382867	0.0494735
ENSG00000171848	RRM2	0.325167	0.00383004	0.0494735
ENSG00000236991	RP11-383C5.7	0.258727	0.00383404	0.0494944
ENSG00000126861	OMG	0.234074	0.00385128	0.049673
ENSG00000181778	TMEM252	0.30071	0.00385266	0.049673
ENSG00000035928	RFC1	-0.143243	0.00386115	0.0497515
ENSG00000227615	RP11-864N7.2	0.228119	0.00388175	0.049986
