# Supplementary material
Source: HighWire-hosted journal article supplement (https://ard.bmj.com/content/78/8/1079)
Supplement: inline-supplementary-material-9 [file inline-supplementary-material-9.xlsx]

## Sheet: Supplementary table 4
TABLE S4
geneID	Name	log2FoldChange	pvalue	padj
ENSG00000115155	OTOF	2.454724149651	5.07285892558877e-32	7.92421398312801e-28
ENSG00000134321	RSAD2	2.38672482684825	7.25295316747793e-32	7.92421398312801e-28
ENSG00000137959	IFI44L	2.34854242424138	1.66498802662834e-31	1.2127217789952e-27
ENSG00000137965	IFI44	2.18190012375734	3.15914753846539e-29	1.58700044426399e-25
ENSG00000187608	ISG15	2.18312995114778	3.63141376656444e-29	1.58700044426399e-25
ENSG00000165949	IFI27	2.31733577794935	9.87977123995048e-29	3.59804802273596e-25
ENSG00000134326	CMPK2	2.08617286233355	1.34848202645298e-27	4.20938296571773e-24
ENSG00000111331	OAS3	2.02797917485386	6.70576540959004e-27	1.8315959995619e-23
ENSG00000214872	SMTNL1	1.92812120658524	6.77496047757274e-26	1.64488512661602e-22
ENSG00000184979	USP18	2.00615639442601	1.79959142616001e-25	3.93228722530224e-22
ENSG00000119917	IFIT3	1.86129954023623	4.7786151952796e-24	9.49250187564133e-21
ENSG00000168062	BATF2	1.81314608328447	1.04034195228156e-23	1.89437599994204e-20
ENSG00000078081	LAMP3	1.77875242292897	1.15570248887906e-22	1.80380393460689e-19
ENSG00000138646	HERC5	1.81995984904451	1.07520688430489e-22	1.80380393460689e-19
ENSG00000133106	EPSTI1	1.73206750804633	2.56375369045341e-22	3.73470545933984e-19
ENSG00000152766	ANKRD22	1.81097405622491	2.82306988199589e-22	3.85543124946826e-19
ENSG00000185745	IFIT1	1.91128597945041	4.48072709149209e-22	5.75931574565845e-19
ENSG00000160932	LY6E	1.76292006319038	6.83916433846507e-22	8.30236555332223e-19
ENSG00000122420	PTGFR	1.97605085174423	1.21166718192409e-21	1.39348103116965e-18
ENSG00000089127	OAS1	1.6698345691723	1.59406614244742e-21	1.74159696393093e-18
ENSG00000126709	IFI6	1.7890308275079	1.94018965373713e-21	2.01881352970524e-18
ENSG00000088827	SIGLEC1	1.92739467057237	2.21626542561757e-21	2.20125526432588e-18
ENSG00000238025	ZDHHC4P1	1.9268194171808	2.94999753436347e-21	2.80262591840766e-18
ENSG00000079385	CEACAM1	1.29752524337794	9.1160748218247e-21	8.29980628882048e-18
ENSG00000225964	AC017076.5	1.81448196647512	1.73505117914077e-20	1.5165041326162e-17
ENSG00000108387	SEPT4	1.64198692449958	5.05438118074777e-20	4.24781858386614e-17
ENSG00000149131	SERPING1	1.6905436605191	7.56315524543343e-20	6.12083352844318e-17
ENSG00000224891	AC007899.3	1.58288322443657	8.54999685477244e-20	6.67235647405831e-17
ENSG00000225492	GBP1P1	1.86436272033259	8.93259975681322e-20	6.73055990641812e-17
ENSG00000188313	PLSCR1	1.32981183295605	1.83733430417422e-19	1.33825306268369e-16
ENSG00000179044	EXOC3L1	1.62741227614807	3.29150293398094e-19	2.32008485840057e-16
ENSG00000196141	SPATS2L	1.61757565099257	3.45999152441898e-19	2.36263358750247e-16
ENSG00000132530	XAF1	1.46533856516731	7.93451729599062e-19	5.25385264953609e-16
ENSG00000119922	IFIT2	1.50961290025979	8.94697841663241e-19	5.75001251123044e-16
ENSG00000157601	MX1	1.67029176840797	9.27626769032258e-19	5.79130643717825e-16
ENSG00000132274	TRIM22	1.17788333356556	1.14762939488695e-18	6.77752700207423e-16
ENSG00000135114	OASL	1.60486452062591	1.12048651582117e-18	6.77752700207423e-16
ENSG00000136514	RTP4	1.43684726202462	1.1812538165617e-18	6.79252030149731e-16
ENSG00000010030	ETV7	1.64059316206152	1.66630713355531e-18	9.33601978854283e-16
ENSG00000055332	EIF2AK2	1.3116268042652	1.7191301480656e-18	9.39117821634537e-16
ENSG00000138496	PARP9	1.13921668254251	4.54028351192746e-18	2.41974963461285e-15
ENSG00000134851	TMEM165	0.695352955835855	5.1067027994089e-18	2.65682292547343e-15
ENSG00000225886	RP11-288L9.4	1.76720752041281	5.25991985710093e-18	2.67289555343052e-15
ENSG00000121236	TRIM6	1.47847802915179	8.41233440888889e-18	4.17767998110526e-15
ENSG00000261211	RP1-80N2.3	1.35459498798071	1.52996459039972e-17	7.42916805884984e-15
ENSG00000107201	DDX58	1.20075635415275	2.01754015627172e-17	9.5837543379768e-15
ENSG00000228318	AP001610.5	1.6211652174832	2.42063356425676e-17	1.12538859601222e-14
ENSG00000002549	LAP3	1.27340032243783	2.71166420838208e-17	1.2344286378616e-14
ENSG00000124256	ZBP1	1.25462430932331	4.17544259281577e-17	1.86199175705342e-14
ENSG00000112053	SLC26A8	1.24888679247502	7.15852759256716e-17	3.1284197285037e-14
ENSG00000152778	IFIT5	1.25668664783831	8.68997214831013e-17	3.72322708652401e-14
ENSG00000125148	MT2A	1.3268187354902	1.34871984725376e-16	5.66747641968115e-14
ENSG00000185507	IRF7	1.27845350090852	1.58956092736524e-16	6.55348977808637e-14
ENSG00000177409	SAMD9L	1.16888624153323	1.8868497551002e-16	7.63510259235082e-14
ENSG00000111335	OAS2	1.40617527427418	1.93435215098657e-16	7.68500524567409e-14
ENSG00000173193	PARP14	1.14070825136143	2.08518462538713e-16	8.13631593738109e-14
ENSG00000185885	IFITM1	1.033466916273	3.59463361678106e-16	1.3780059501804e-13
ENSG00000181381	DDX60L	1.13097554278163	4.0874842855221e-16	1.53992446763696e-13
ENSG00000068079	IFI35	1.14987727004305	5.33053443612656e-16	1.97419505023392e-13
ENSG00000142089	IFITM3	1.44251172923648	5.66500795916296e-16	2.06310148192783e-13
ENSG00000079393	DUSP13	1.43870263508063	6.1948937372345e-16	2.21909218118543e-13
ENSG00000197272	IL27	1.10073684240837	6.81887032430468e-16	2.4032118621997e-13
ENSG00000225630	MTND2P28	-1.64274162510252	8.76015408280044e-16	3.03838296608369e-13
ENSG00000123610	TNFAIP6	1.29866843365891	1.02025696120675e-15	3.48338044677011e-13
ENSG00000141664	ZCCHC2	1.18705368782397	1.52844356732168e-15	5.13815698300709e-13
ENSG00000117228	GBP1	1.25596250842007	1.59683887166731e-15	5.28674639163673e-13
ENSG00000134809	TIMM10	1.17888622473728	1.6411354340074e-15	5.35230602514863e-13
ENSG00000185338	SOCS1	1.23159984626787	1.74952973573312e-15	5.62190797875065e-13
ENSG00000233029	RP11-439A17.9	1.28257308520938	1.89603969284751e-15	6.00440048237841e-13
ENSG00000165185	KIAA1958	1.10463119761615	2.13818200207997e-15	6.67448784677849e-13
ENSG00000198019	FCGR1B	1.18624025290063	2.4810896440173e-15	7.63581546639746e-13
ENSG00000196358	NTNG2	1.21080667039657	2.53396172268352e-15	7.69022188921634e-13
ENSG00000188157	AGRN	1.36598170325354	2.56964919851334e-15	7.69169926530343e-13
ENSG00000205837	LINC00487	1.62361504011069	5.79604255131022e-15	1.7114773755227e-12
ENSG00000137628	DDX60	1.2758484291681	6.07541466012395e-15	1.77005180984491e-12
ENSG00000108984	MAP2K6	0.82598427173131	6.30310688841376e-15	1.81222616603591e-12
ENSG00000116663	FBXO6	1.01922426744564	7.32112304538111e-15	2.07758259304705e-12
ENSG00000120217	CD274	1.21219232876406	9.12320584919477e-15	2.55578424372763e-12
ENSG00000213373	LINC00671	1.13803200446154	1.3627958000531e-14	3.76942418062789e-12
ENSG00000169385	RNASE2	1.27770961465721	1.80250148286393e-14	4.92330748775746e-12
ENSG00000175643	RMI2	1.20100483531776	2.1014757988475e-14	5.66905526921194e-12
ENSG00000121858	TNFSF10	0.922285630201874	2.64279480168232e-14	7.04240356238542e-12
ENSG00000260943	RP11-476D10.1	1.25754940690421	3.06774360142116e-14	8.07629704031974e-12
ENSG00000115267	IFIH1	1.07216822287481	3.54718212856049e-14	9.22731865371133e-12
ENSG00000196866	HIST1H2AD	1.20290555806375	3.72452797187444e-14	9.57466596628568e-12
ENSG00000156587	UBE2L6	0.961778131372562	4.57730994376259e-14	1.16300929745531e-11
ENSG00000150337	FCGR1A	1.25786870475457	6.11045165772503e-14	1.53470665716034e-11
ENSG00000059378	PARP12	0.973630138942853	6.44898485682651e-14	1.60132691030132e-11
ENSG00000196116	TDRD7	0.836089821310658	7.55266102254348e-14	1.85430557307413e-11
ENSG00000158406	HIST1H4H	1.04857897610287	8.29694693321518e-14	2.01440652708539e-11
ENSG00000188290	HES4	1.43631299867934	8.59586618757561e-14	2.0640469457661e-11
ENSG00000197409	HIST1H3D	1.13032242864632	8.8780715469463e-14	2.10863849317743e-11
ENSG00000130589	HELZ2	1.10323801110258	9.14034653250538e-14	2.14758830195457e-11
ENSG00000128342	LIF	1.37372404087222	1.27629551718128e-13	2.93561403641348e-11
ENSG00000140464	PML	0.976215798891342	1.27528471231932e-13	2.93561403641348e-11
ENSG00000213500	LAP3P2	1.23995551126785	1.29954904667927e-13	2.95796314781133e-11
ENSG00000183019	C19orf59	1.03703305007819	1.39795464010699e-13	3.14914503515235e-11
ENSG00000160883	HK3	0.751785780563876	1.4530437968423e-13	3.23984285763277e-11
ENSG00000221963	APOL6	0.951947068236303	2.16233290060264e-13	4.77264002132002e-11
ENSG00000170581	STAT2	0.910374970124892	2.27357132920012e-13	4.96798071143517e-11
ENSG00000130489	SCO2	0.920742149770969	2.66752800903874e-13	5.77110440846589e-11
ENSG00000257017	HP	1.29215963236758	4.20306120310693e-13	9.00402846559701e-11
ENSG00000255221	CARD17	1.39633996763323	4.55161622900597e-13	9.65605497281645e-11
ENSG00000177989	ODF3B	0.954556079442281	6.24000598043025e-13	1.3110612565229e-10
ENSG00000213492	AC092661.2	0.920384990853449	1.16279941131295e-12	2.41984094634279e-10
ENSG00000217275	RP1-34B20.4	1.25580596732383	1.37576220709956e-12	2.83601697993704e-10
ENSG00000197846	HIST1H2BF	1.15227885542356	1.5044674244084e-12	3.07234744773344e-10
ENSG00000152229	PSTPIP2	0.890513731151276	1.58946041569711e-12	3.2158610688331e-10
ENSG00000269640	CTD-2521M24.9	0.806509054482309	1.80798717844023e-12	3.62443374643095e-10
ENSG00000225963	AC009950.2	0.853252880072749	1.9798496302744e-12	3.93288129737507e-10
ENSG00000123609	NMI	0.743410249417759	2.1890721385874e-12	4.30931669371832e-10
ENSG00000123130	ACOT9	0.671964858465	2.31260784299788e-12	4.51185660512024e-10
ENSG00000128383	APOBEC3A	0.948569578907197	2.67686518852057e-12	5.1762992242799e-10
ENSG00000136689	IL1RN	0.963732980379486	3.35469201621986e-12	6.43012063565088e-10
ENSG00000129538	RNASE1	1.33854883108621	3.54445039812631e-12	6.73476396951809e-10
ENSG00000139572	GPR84	1.09950250817556	3.9814800489701e-12	7.49994142672807e-10
ENSG00000225470	JPX	0.627398477533764	4.0696278044045e-12	7.60046471402074e-10
ENSG00000183347	GBP6	1.21766827229961	4.73067872657272e-12	8.76017464867292e-10
ENSG00000183486	MX2	0.924585831751312	5.36697837522404e-12	9.85494491403533e-10
ENSG00000178685	PARP10	0.852299975008595	6.73122827058816e-12	1.21987542262601e-09
ENSG00000250011	HMGB1P3	0.806303378570897	6.75506503765263e-12	1.21987542262601e-09
ENSG00000067066	SP100	0.632536013509286	7.2216288396794e-12	1.29344108012979e-09
ENSG00000108771	DHX58	0.987932692851389	7.39987919154955e-12	1.31459154645975e-09
ENSG00000100342	APOL1	0.84696692205895	7.98601215420598e-12	1.40727702888351e-09
ENSG00000120280	CXorf21	0.624507707866745	8.12432928187534e-12	1.42019775310606e-09
ENSG00000121060	TRIM25	0.811338045973843	8.84963414961351e-12	1.53470917304131e-09
ENSG00000136816	TOR1B	0.839120887595657	9.64038061568324e-12	1.65867682545901e-09
ENSG00000130066	SAT1	0.732199692334986	1.02854856324936e-11	1.75584489496576e-09
ENSG00000135899	SP110	0.702294373818013	1.0590460781287e-11	1.79389270179769e-09
ENSG00000113763	UNC5A	0.884255492040455	1.06888370895642e-11	1.7966290711082e-09
ENSG00000099860	GADD45B	0.610264839086951	1.09940618174851e-11	1.81529081659053e-09
ENSG00000136147	PHF11	0.623419283885387	1.10490905956954e-11	1.81529081659053e-09
ENSG00000241624	RP4-697K14.12	1.05558730563265	1.10487690020314e-11	1.81529081659053e-09
ENSG00000177294	FBXO39	1.40147989877404	1.13213329983859e-11	1.8461376667741e-09
ENSG00000087237	CETP	0.900486435995272	1.17329005819932e-11	1.89907859716394e-09
ENSG00000082014	SMARCD3	0.63718865478888	1.27334409861162e-11	2.04587072785018e-09
ENSG00000102524	TNFSF13B	0.893293594823643	1.36209349087274e-11	2.17248940650074e-09
ENSG00000130303	BST2	0.798491147709225	1.39672206095422e-11	2.2115778082544e-09
ENSG00000231233	RP11-127L20.6	1.01522117581339	1.60436575486e-11	2.52208605103926e-09
ENSG00000112343	TRIM38	0.559978091435694	1.89404117056774e-11	2.95619240129112e-09
ENSG00000168394	TAP1	0.692303902348286	1.95100994967736e-11	3.023511944e-09
ENSG00000163840	DTX3L	0.740939739178946	1.99593465157592e-11	3.07134986419615e-09
ENSG00000160716	CHRNB2	0.890860551901096	2.03147898318047e-11	3.08262828204698e-09
ENSG00000269720	CTD-2521M24.5	1.26220068529385	2.02031987209229e-11	3.08262828204698e-09
ENSG00000173821	RNF213	0.76946145150927	2.13843706978857e-11	3.22255092496207e-09
ENSG00000205413	SAMD9	0.89855576887575	2.19742857082926e-11	3.28876792473905e-09
ENSG00000247317	RP11-273G15.2	1.24603711073689	2.34346215923089e-11	3.48346881913974e-09
ENSG00000187116	LILRA5	0.826325662665979	2.43512612159215e-11	3.5952662758723e-09
ENSG00000172159	FRMD3	0.977623874445142	2.51350345016572e-11	3.68607811339403e-09
ENSG00000099985	OSM	0.895423613093323	2.58789791369494e-11	3.7698771541432e-09
ENSG00000169245	CXCL10	1.33388479092708	2.75585790468359e-11	3.98796364736696e-09
ENSG00000118113	MMP8	1.34345853351199	3.39038929292526e-11	4.87390766050723e-09
ENSG00000196123	KIAA0895L	0.643209606150216	3.51106564912218e-11	5.01439839862541e-09
ENSG00000138642	HERC6	0.979577376803235	4.32108430955244e-11	6.13116969143055e-09
ENSG00000254470	AP5B1	0.842980048465444	4.49361296395266e-11	6.33483463711803e-09
ENSG00000185880	TRIM69	0.588068129751246	4.9878894986258e-11	6.98656239964567e-09
ENSG00000135363	LMO2	0.629810849135699	5.39307771307305e-11	7.50599624894007e-09
ENSG00000122643	NT5C3	0.789029900163155	5.82780817877195e-11	8.05971117179405e-09
ENSG00000181458	TMEM45A	1.35723156776383	5.87820727191987e-11	8.07828346532836e-09
ENSG00000142961	MOB3C	0.557340192609471	5.99120939200773e-11	8.18211977654756e-09
ENSG00000175827	AP001266.1	0.830309833212283	6.68504788960759e-11	9.07298021340469e-09
ENSG00000197646	PDCD1LG2	1.16812274204938	7.17141999040648e-11	9.67300606236864e-09
ENSG00000197536	C5orf56	0.672019455546624	7.28113171238552e-11	9.7607367513703e-09
ENSG00000179869	ABCA13	1.29759092484595	7.66552973890864e-11	1.02133835563959e-08
ENSG00000136827	TOR1A	0.451207887452032	8.57367584622159e-11	1.13541449039871e-08
ENSG00000126262	FFAR2	0.820303301374896	8.68089033799872e-11	1.14268755888922e-08
ENSG00000087116	ADAMTS2	1.35254769481037	8.89228511433412e-11	1.16350492235518e-08
ENSG00000204261	XXbac-BPG246D15.8	0.482340132614479	9.6504742890474e-11	1.2551935338689e-08
ENSG00000164054	SHISA5	0.783149600586208	9.87770888870325e-11	1.27714684572222e-08
ENSG00000255328	RP11-326C3.12	1.1547454921417	1.02667114761351e-10	1.31963477920605e-08
ENSG00000169228	RAB24	0.557901887666404	1.08566028441081e-10	1.38729607454156e-08
ENSG00000115415	STAT1	0.800418971070604	1.14497846272206e-10	1.45458862726393e-08
ENSG00000145685	LHFPL2	0.825523736617709	1.3599422520646e-10	1.7176935346742e-08
ENSG00000147697	GSDMC	1.30236427735307	1.384497042e-10	1.73865775084725e-08
ENSG00000213588	ZBTB9	-0.387734034675878	1.40302274305851e-10	1.75185428334695e-08
ENSG00000229023	AC067945.3	1.07794409310959	1.41300852972102e-10	1.75429826039398e-08
ENSG00000166527	CLEC4D	1.04433361175988	1.4597118714636e-10	1.80204316968086e-08
ENSG00000118520	ARG1	1.23487344904834	1.48554304174033e-10	1.82362926994763e-08
ENSG00000163565	IFI16	0.728857130712378	1.5676623517705e-10	1.91368659489035e-08
ENSG00000137414	FAM8A1	0.748463313483814	1.61075290162887e-10	1.94456141732002e-08
ENSG00000148834	GSTO1	0.50364252258367	1.60901890835004e-10	1.94456141732002e-08
ENSG00000163220	S100A9	0.787285647426483	1.76222049866543e-10	2.11572967672188e-08
ENSG00000162772	ATF3	1.08411774905474	1.90531716017185e-10	2.27503198179864e-08
ENSG00000128335	APOL2	0.69203327859465	2.0751846737647e-10	2.46439458187133e-08
ENSG00000108679	LGALS3BP	0.926536844880293	2.2852099180012e-10	2.6991417253105e-08
ENSG00000261685	RP11-401P9.4	0.863620184441539	2.30616375391723e-10	2.70924646165836e-08
ENSG00000118162	KPTN	0.719351150252582	2.37028007237507e-10	2.754946269227e-08
ENSG00000171658	RP11-443P15.2	1.23026445810118	2.36996459848431e-10	2.754946269227e-08
ENSG00000172965	AC068491.1	0.671149726962485	2.60905147626368e-10	3.01642242369512e-08
ENSG00000223401	RP11-211G3.2	0.908226150864192	2.66898311557158e-10	3.06947105570287e-08
ENSG00000168404	MLKL	0.586828564254559	2.89500001722044e-10	3.3119709621091e-08
ENSG00000197956	S100A6	0.534264461267335	2.94015409898212e-10	3.34610975087804e-08
ENSG00000203814	HIST2H2BF	1.01158080077149	3.12383951712086e-10	3.53673664707813e-08
ENSG00000213347	MXD3	0.508680109101993	3.14003563910031e-10	3.53674838917427e-08
ENSG00000132256	TRIM5	0.722101776273065	3.19228103939468e-10	3.5771555380417e-08
ENSG00000131089	ARHGEF9	-0.423315659344075	3.20990592753515e-10	3.57855379706993e-08
ENSG00000254503	CTD-2521M24.4	0.911387814760718	3.62027646679713e-10	4.01556655208041e-08
ENSG00000109046	WSB1	0.5939011121333	3.72511716384925e-10	4.04962861429204e-08
ENSG00000139641	ESYT1	-0.487562552076012	3.67261797993785e-10	4.04962861429204e-08
ENSG00000188987	HIST1H4D	1.09911206379572	3.68808396337884e-10	4.04962861429204e-08
ENSG00000229677	RP11-383F6.1	1.07909280105438	3.72499467097514e-10	4.04962861429204e-08
ENSG00000240065	PSMB9	0.605598711240924	4.01038438129311e-10	4.33816381760573e-08
ENSG00000183784	C9orf66	0.701170470176913	4.08547874830751e-10	4.39762542508707e-08
ENSG00000188282	RUFY4	0.951119766471656	4.59025617547317e-10	4.91674939658158e-08
ENSG00000100336	APOL4	1.21012224686213	4.80030918158506e-10	5.11666126472269e-08
ENSG00000186583	SPATC1	0.989334760283709	5.45956854993705e-10	5.79111807692595e-08
ENSG00000144130	NT5DC4	0.91923175209733	5.93875417809526e-10	6.26897186210432e-08
ENSG00000233785	RP13-314C10.5	1.27769653846306	7.13156142101361e-10	7.49191099089271e-08
ENSG00000138772	ANXA3	1.00037050082969	7.42747056923777e-10	7.72845997182926e-08
ENSG00000242550	SERPINB10	1.14173164395837	7.41600476430821e-10	7.72845997182926e-08
ENSG00000233975	RP11-288L9.1	1.23811369166664	8.18906534497167e-10	8.48053397407469e-08
ENSG00000121380	BCL2L14	1.22318544148675	8.46461802742654e-10	8.72454568477817e-08
ENSG00000023171	GRAMD1B	0.737591199743642	8.50869396418064e-10	8.72880149348878e-08
ENSG00000172183	ISG20	0.688485310054829	8.9553366965321e-10	9.14406832504313e-08
ENSG00000172432	GTPBP2	0.566952910959999	9.00902953859117e-10	9.15610718361654e-08
ENSG00000136048	DRAM1	0.535948607878828	9.07103696036953e-10	9.17644576949234e-08
ENSG00000173391	OLR1	1.24389189287523	9.71980824336971e-10	9.78744377538578e-08
ENSG00000074660	SCARF1	0.777880653775171	9.80771998265717e-10	9.83066464867165e-08
ENSG00000101084	C20orf24	0.508913151774737	1.00930333057878e-09	1.00704507198525e-07
ENSG00000075399	VPS9D1	0.665479509108735	1.059365540506e-09	1.04742970251568e-07
ENSG00000130487	KLHDC7B	0.966116244176632	1.0557754817793e-09	1.04742970251568e-07
ENSG00000155363	MOV10	0.740221647754091	1.07984088175939e-09	1.06286500483444e-07
ENSG00000155093	PTPRN2	0.796142297760615	1.18721504606674e-09	1.16331103011679e-07
ENSG00000254667	AP000783.1	0.851987034607398	1.26296772490258e-09	1.23201373914493e-07
ENSG00000168899	VAMP5	0.734945388224862	1.3216949669094e-09	1.28357140986388e-07
ENSG00000135372	NAT10	-0.467721162043776	1.37331696804035e-09	1.32780305613494e-07
ENSG00000186431	FCAR	0.77625077225772	1.41285615349023e-09	1.36001408854251e-07
ENSG00000216331	HIST1H1PS1	1.09089411046926	1.53792394982725e-09	1.47391123805594e-07
ENSG00000169871	TRIM56	0.660744849713903	1.55014357667947e-09	1.47851626041726e-07
ENSG00000237719	RP1-179N16.3	0.862478174727516	1.55885651000125e-09	1.47851626041726e-07
ENSG00000260249	RP11-401P9.5	0.592197450450872	1.56302803604589e-09	1.47851626041726e-07
ENSG00000183696	UPP1	0.468133336439897	1.64348072074866e-09	1.54791798401203e-07
ENSG00000163666	HESX1	1.25320488950064	1.67830302890124e-09	1.57393130834854e-07
ENSG00000213928	IRF9	0.594699693260087	1.69348028633203e-09	1.58137768105305e-07
ENSG00000232815	RP11-764K9.2	0.742057721180334	1.77260827976812e-09	1.6482239796261e-07
ENSG00000198216	CACNA1E	0.885202813233773	1.86328464274296e-09	1.72519630205833e-07
ENSG00000146425	DYNLT1	0.608180673817669	1.97832693098976e-09	1.82398404088849e-07
ENSG00000203666	EFCAB2	0.742318635088777	2.16553420051819e-09	1.98819696703878e-07
ENSG00000143771	CNIH4	0.493022131697334	2.19411686035182e-09	2.00601035629906e-07
ENSG00000125826	RBCK1	0.577307601386865	2.23129781026305e-09	2.02307420962896e-07
ENSG00000169397	RNASE3	1.16992725173268	2.22949475916695e-09	2.02307420962896e-07
ENSG00000137752	CASP1	0.593588913639909	2.25973889581243e-09	2.0403948186941e-07
ENSG00000249934	RP11-466G12.3	1.24878924144343	2.41361569719563e-09	2.1703669382478e-07
ENSG00000251230	RP11-701P16.5	0.977871536708339	2.58569072644204e-09	2.31557082227398e-07
ENSG00000136634	IL10	1.04326942853179	2.60119587487211e-09	2.31994820660533e-07
ENSG00000095380	NANS	0.416371899440128	2.75982275473947e-09	2.45141817129318e-07
ENSG00000225101	OR52K3P	0.821187674476329	2.87874258482271e-09	2.54669652716441e-07
ENSG00000260336	RP11-395B7.7	0.506068380935148	3.30397292538379e-09	2.91109324163553e-07
ENSG00000196415	PRTN3	1.20232719257677	3.45216179451623e-09	3.0294452759829e-07
ENSG00000262112	RP11-670E13.5	0.759316139347257	3.54891061477058e-09	3.10188983373408e-07
ENSG00000254477	AP000640.10	0.83970280814117	3.66893060835228e-09	3.19401604474524e-07
ENSG00000122783	C7orf49	0.670327062153926	3.74596783166278e-09	3.24814059879617e-07
ENSG00000197063	MAFG	0.529636546581397	3.8918917009706e-09	3.36133302600429e-07
ENSG00000244617	ASPRV1	0.784489825391927	3.91229836497426e-09	3.36565478634065e-07
ENSG00000134827	TCN1	1.03516745349491	3.98653236118745e-09	3.41606739703165e-07
ENSG00000137757	CASP5	0.905280984493951	4.00541231776769e-09	3.41883845920085e-07
ENSG00000154451	GBP5	0.935890041491041	4.15145781791483e-09	3.52970835716953e-07
ENSG00000231607	DLEU2	0.498856334739399	4.34590040507206e-09	3.67169610221472e-07
ENSG00000269728	RP11-145M9.4	0.617001824696141	4.35206301987832e-09	3.67169610221472e-07
ENSG00000259399	TGIF2-C20ORF24	0.489623856948039	4.43116133051853e-09	3.72405023973694e-07
ENSG00000141086	CTRL	0.523186662407766	4.51447623995723e-09	3.77953334556726e-07
ENSG00000129667	RHBDF2	0.572264545518581	4.84628663974672e-09	4.04184005210326e-07
ENSG00000213719	CLIC1	0.47450522063159	5.03918438523151e-09	4.1867383270606e-07
ENSG00000114127	XRN1	0.596675373097792	5.26069923964182e-09	4.35422496535657e-07
ENSG00000051620	HEBP2	0.481276931697065	5.54450230311483e-09	4.57180829529668e-07
ENSG00000203583	AL021707.1	0.592216272417288	5.68313226590952e-09	4.66850087001462e-07
ENSG00000164821	DEFA4	1.18406003787372	5.79840609153666e-09	4.74535473805871e-07
ENSG00000223722	RP11-467L13.5	1.07175578017395	5.92085229161813e-09	4.82748296358761e-07
ENSG00000135148	TRAFD1	0.613864228287485	5.99791821821374e-09	4.8721379548769e-07
ENSG00000143891	GALM	0.707514323571722	6.15841647763438e-09	4.98398364639959e-07
ENSG00000164713	BRI3	0.551420596257939	6.19427736292137e-09	4.99450755192601e-07
ENSG00000175518	UBQLNL	0.919420058486266	6.33893816864577e-09	5.09235801187789e-07
ENSG00000025708	TYMP	0.699701273202156	6.41112671232988e-09	5.13074467021645e-07
ENSG00000085511	MAP3K4	-0.355658959463942	6.43368285039269e-09	5.13074467021645e-07
ENSG00000108691	CCL2	1.20842052184246	6.6309053628896e-09	5.26879683943639e-07
ENSG00000100918	REC8	0.608844314192237	6.69854257778484e-09	5.28411024791251e-07
ENSG00000117226	GBP3	0.744264257158065	6.69054293893527e-09	5.28411024791251e-07
ENSG00000158373	HIST1H2BD	0.865746864972976	7.03354124606019e-09	5.52841402041947e-07
ENSG00000143612	C1orf43	0.225426693579831	7.32216183221475e-09	5.73464366292919e-07
ENSG00000248477	RP11-848G14.2	0.969199500925465	7.44512964792161e-09	5.81012599774054e-07
ENSG00000116691	MIIP	0.414926207238914	7.61628311041322e-09	5.92254100518289e-07
ENSG00000105402	NAPA	0.627088691563151	7.73847712181123e-09	5.97503404907057e-07
ENSG00000138035	PNPT1	0.709341263185952	7.71354172215984e-09	5.97503404907057e-07
ENSG00000123689	G0S2	0.879451075820534	8.04187101012324e-09	6.18742688176771e-07
ENSG00000132383	RPA1	-0.382838787734056	8.13704675220929e-09	6.23868802043948e-07
ENSG00000152102	FAM168B	-0.302847926277602	8.23887232716962e-09	6.29053778009317e-07
ENSG00000163823	CCR1	0.769811642013711	8.26225043653261e-09	6.29053778009317e-07
ENSG00000196954	CASP4	0.55384165999502	8.64887447085236e-09	6.56203319661788e-07
ENSG00000188636	LDOC1L	-0.444157789939646	8.82545773269395e-09	6.67284003173341e-07
ENSG00000158882	TOMM40L	0.369434095146834	9.0917476390154e-09	6.85047509172847e-07
ENSG00000133101	CCNA1	1.16321199292493	9.72223589086708e-09	7.30036345193597e-07
ENSG00000117010	ZNF684	0.850790084868852	1.00604984547243e-08	7.52849149774592e-07
ENSG00000096968	JAK2	0.627471391615804	1.04129298788863e-08	7.76562903698103e-07
ENSG00000113368	LMNB1	0.640808126838879	1.04572055744026e-08	7.77212241517933e-07
ENSG00000142687	KIAA0319L	0.602949162755495	1.0625674115305e-08	7.87056288452641e-07
ENSG00000255538	OR10V2P	1.02459472794574	1.07012340252508e-08	7.89975218532956e-07
ENSG00000152463	OLAH	1.19339560742464	1.07756863756179e-08	7.90144105526365e-07
ENSG00000224950	RP5-1086K13.1	0.616160487370492	1.07943664712895e-08	7.90144105526365e-07
ENSG00000258227	CLEC5A	0.830585532643075	1.08120034576167e-08	7.90144105526365e-07
ENSG00000123700	KCNJ2	0.775889850088639	1.09865078324119e-08	8.00220608820109e-07
ENSG00000268734	CTB-61M7.2	0.750771264013762	1.11948594287688e-08	8.12687286970191e-07
ENSG00000116005	PCYOX1	-0.421579152448692	1.17026745575735e-08	8.46738879991851e-07
ENSG00000110057	UNC93B1	0.663494442945353	1.20156054629943e-08	8.6651153456069e-07
ENSG00000146859	TMEM140	0.733776755232445	1.22679204213442e-08	8.81797135285503e-07
ENSG00000233214	AC002511.2	0.941510347729107	1.23530831772855e-08	8.85007280350375e-07
ENSG00000170439	METTL7B	1.13600298777384	1.2436933084e-08	8.88102695485245e-07
ENSG00000100448	CTSG	1.14619364045835	1.30375419187458e-08	9.27958724646627e-07
ENSG00000171766	GATM	-0.726838317042147	1.33688421613337e-08	9.46079979751326e-07
ENSG00000267339	CTD-2081K17.1	1.18999137777224	1.33787338677022e-08	9.46079979751326e-07
ENSG00000173110	HSPA6	0.692164788758569	1.39609951521079e-08	9.84070016350679e-07
ENSG00000168528	SERINC2	0.730311664181743	1.41363995085904e-08	9.93229793126074e-07
ENSG00000118564	FBXL5	0.502641639768697	1.4832346113153e-08	1.03878716320034e-06
ENSG00000158887	MPZ	0.515785138917441	1.50745327884176e-08	1.05237576983934e-06
ENSG00000235192	AC009495.2	0.759717914716571	1.55428366114619e-08	1.08161312992692e-06
ENSG00000164047	CAMP	1.05210918664097	1.63716880642098e-08	1.13567541552714e-06
ENSG00000259529	RNF31	0.533961003382029	1.6447776125475e-08	1.13734289910682e-06
ENSG00000121797	CCRL2	0.750439396662618	1.6691834054934e-08	1.15057812597591e-06
ENSG00000152558	TMEM123	0.659120591229301	1.68827642218316e-08	1.15644288718258e-06
ENSG00000185909	KLHDC8B	0.791635705039093	1.68622450723615e-08	1.15644288718258e-06
ENSG00000233488	AC108463.3	0.700948305390702	1.73362021386891e-08	1.18379172791405e-06
ENSG00000129467	ADCY4	0.614055198317889	1.85803418576922e-08	1.26479454807611e-06
ENSG00000163754	GYG1	0.552989519675702	1.95326721801039e-08	1.32549198697966e-06
ENSG00000135108	FBXO21	-0.362620766665021	2.01950168315283e-08	1.36619601481649e-06
ENSG00000128512	DOCK4	0.824953163755381	2.08202240656721e-08	1.40414418536729e-06
ENSG00000251441	RTEL1P1	0.799661191288912	2.12010210852653e-08	1.42542618995117e-06
ENSG00000266777	SH3GL1P1	0.55148599680021	2.12764003905985e-08	1.42610621145696e-06
ENSG00000162654	GBP4	0.738468467503647	2.40436835278346e-08	1.6066621674823e-06
ENSG00000115339	GALNT3	0.5886354790997	2.4511215397093e-08	1.63291026720085e-06
ENSG00000185897	FFAR3	1.04933426167832	2.56287629256016e-08	1.70217051272742e-06
ENSG00000132357	CARD6	0.547708950164504	2.60302880378193e-08	1.72359946640724e-06
ENSG00000249437	NAIP	0.775391341153153	2.6582663082509e-08	1.75485731424744e-06
ENSG00000147576	ADHFE1	-0.407155950815231	2.71936485436466e-08	1.78978438050368e-06
ENSG00000113732	ATP6V0E1	0.359627117036971	2.81230626475972e-08	1.8453965222602e-06
ENSG00000116815	CD58	0.542729874201801	3.00902777933225e-08	1.96857083850865e-06
ENSG00000137200	FTSJD2	0.543220609970786	3.0760173253581e-08	2.00638968884775e-06
ENSG00000169991	IFFO2	-0.410879447463836	3.09883843120411e-08	2.01478591494908e-06
ENSG00000255557	RP11-770G2.2	0.928505354835059	3.10733080105186e-08	2.01478591494908e-06
ENSG00000226608	FTLP3	0.423692335998139	3.23570953253236e-08	2.09181920104629e-06
ENSG00000127564	PKMYT1	0.645591886305727	3.31480411224001e-08	2.13663081582763e-06
ENSG00000140718	FTO	-0.421248289039611	3.37717963929354e-08	2.17043389112362e-06
ENSG00000260170	SQRDL	0.53628682656793	3.40275698987573e-08	2.18045873858577e-06
ENSG00000125779	PANK2	0.374565385566221	3.54161799374864e-08	2.25620684493882e-06
ENSG00000261438	RP11-399O19.8	0.655493545029802	3.53203990526166e-08	2.25620684493882e-06
ENSG00000137767	SQRDL	0.527464614792285	3.5870789161565e-08	2.2785250406086e-06
ENSG00000106392	C1GALT1	0.574838604759987	3.77185259611934e-08	2.38894930660301e-06
ENSG00000124688	MAD2L1BP	0.382690373437321	3.80221294070773e-08	2.40121835165909e-06
ENSG00000105939	ZC3HAV1	0.548758794178587	3.89167524405442e-08	2.45063388351104e-06
ENSG00000119689	DLST	-0.142533047388945	3.9179898484194e-08	2.46011483269576e-06
ENSG00000185760	KCNQ5	-0.598856352725101	4.00169260062525e-08	2.50475132819079e-06
ENSG00000204936	CD177	1.11563638634984	4.01200386649021e-08	2.50475132819079e-06
ENSG00000129355	CDKN2D	0.47695338971432	4.05153552279522e-08	2.52222514839311e-06
ENSG00000152213	ARL11	0.498369921868277	4.18296666049833e-08	2.59664785507242e-06
ENSG00000148843	PDCD11	-0.3435716435228	4.23703130482419e-08	2.62275838645081e-06
ENSG00000213689	TREX1	0.655623468539614	4.35884031787971e-08	2.6905372820901e-06
ENSG00000109854	HTATIP2	0.424425622448103	4.44104887311874e-08	2.73355940638078e-06
ENSG00000021355	SERPINB1	0.518495460380529	4.51352902653867e-08	2.76260848064136e-06
ENSG00000104918	RETN	0.933012703668684	4.50235540597055e-08	2.76260848064136e-06
ENSG00000105967	TFEC	0.791990757005819	4.53338678302594e-08	2.76701213955028e-06
ENSG00000073737	DHRS9	0.818597177913688	4.55127761385631e-08	2.77019407076251e-06
ENSG00000236824	BCYRN1	1.10575784599078	4.62756802309535e-08	2.80880524646268e-06
ENSG00000180573	HIST1H2AC	0.628951689876273	4.85635795057019e-08	2.93950907418031e-06
ENSG00000140853	NLRC5	0.404584990974592	4.87761209452684e-08	2.944218283909e-06
ENSG00000096006	CRISP3	1.08037160096754	4.91037609184597e-08	2.95582997198144e-06
ENSG00000136231	IGF2BP3	0.756192943832648	4.99878100689222e-08	3.00077922476928e-06
ENSG00000143162	CREG1	0.523204826664979	5.41665660526003e-08	3.24272228716539e-06
ENSG00000106785	TRIM14	0.483379884056977	5.54158763954001e-08	3.29437190762423e-06
ENSG00000144028	SNRNP200	-0.283100253571382	5.52560800043417e-08	3.29437190762423e-06
ENSG00000198218	QRICH1	-0.22818203339292	5.54816192396557e-08	3.29437190762423e-06
ENSG00000175550	DRAP1	0.558554350284278	5.59034420010108e-08	3.31042306548533e-06
ENSG00000234290	AC116366.6	0.62258391850251	5.86918765359673e-08	3.46615187618222e-06
ENSG00000166002	C11orf75	0.5502681487796	5.90976260553487e-08	3.48070681114669e-06
ENSG00000267194	RP1-193H18.2	0.621124800499919	5.92914643052983e-08	3.48273598530934e-06
ENSG00000130813	C19orf66	0.543792145082342	6.01710061335371e-08	3.52492400810702e-06
ENSG00000204267	TAP2	0.545793773904363	6.05263912994724e-08	3.53626250343522e-06
ENSG00000163958	ZDHHC19	0.962681066868257	6.08768672762579e-08	3.54725447160936e-06
ENSG00000124107	SLPI	0.943968588253013	6.3659005857444e-08	3.69950249199737e-06
ENSG00000166523	CLEC4E	0.78884617698415	6.44177171770817e-08	3.73366455712576e-06
ENSG00000109107	ALDOC	-0.423433767515423	6.45972284566557e-08	3.73416412435551e-06
ENSG00000204264	PSMB8	0.415563026020593	6.81772275389301e-08	3.93071398140676e-06
ENSG00000117281	CD160	-0.668995878369966	6.98063543604963e-08	4.01404907666106e-06
ENSG00000197561	ELANE	1.07398719100851	7.17470426222855e-08	4.11481529747916e-06
ENSG00000242590	RP11-54O7.14	1.07061578216905	7.23964669788746e-08	4.14119162291987e-06
ENSG00000239961	LILRA4	-0.816735741489443	7.29505894951023e-08	4.16199303148167e-06
ENSG00000158006	PAFAH2	-0.325701565418204	7.3704434927542e-08	4.19405106146282e-06
ENSG00000020577	SAMD4A	0.754430405590481	7.42113751075943e-08	4.21192924019752e-06
ENSG00000163568	AIM2	0.800463055013933	7.57319566351283e-08	4.2776146199369e-06
ENSG00000186081	KRT5	-1.02945236555699	7.595599618029e-08	4.2776146199369e-06
ENSG00000233875	RP11-61L14.6	0.984402075834025	7.58200235040967e-08	4.2776146199369e-06
ENSG00000228261	RP11-127L20.3	0.90302044302116	7.8364656671245e-08	4.40191802808065e-06
ENSG00000237765	FAM200B	0.412240789729675	7.92088220858093e-08	4.43792813178723e-06
ENSG00000108106	UBE2S	0.621573056872477	7.98238649521163e-08	4.44956957415483e-06
ENSG00000258588	TRIM6-TRIM34	0.46102962875006	7.97922834811232e-08	4.44956957415483e-06
ENSG00000154217	PITPNC1	-0.29945322738292	8.04726383320188e-08	4.46923317442416e-06
ENSG00000198604	BAZ1A	0.555344883587379	8.05856881022891e-08	4.46923317442416e-06
ENSG00000244498	RP11-477J21.5	0.944294604468989	8.18685121638627e-08	4.52888318808244e-06
ENSG00000143889	HNRPLL	0.470724547747977	8.28140707119735e-08	4.56962186648316e-06
ENSG00000167210	LOXHD1	0.883111031162059	8.35027823569239e-08	4.59601838106081e-06
ENSG00000212743	DKFZP667F0711	0.766294961799412	8.55999183012741e-08	4.69960757487724e-06
ENSG00000179981	TSHZ1	-0.445801095447853	8.79196438336957e-08	4.81486751230598e-06
ENSG00000180509	KCNE1	0.808791038841661	8.99440746415663e-08	4.91341993748216e-06
ENSG00000145041	VPRBP	-0.3147879606005	9.06477899676037e-08	4.93951336304765e-06
ENSG00000101096	NFATC2	-0.409998442550072	9.15189565503018e-08	4.97457890442946e-06
ENSG00000113916	BCL6	0.702564875156223	9.30560365332923e-08	5.04557680965005e-06
ENSG00000238015	RP4-641G12.3	1.08714894272149	9.50928325709373e-08	5.14325119927612e-06
ENSG00000144655	CSRNP1	0.664824626726223	9.78178904483277e-08	5.27757709675656e-06
ENSG00000213949	ITGA1	0.664071316368685	9.88109531950786e-08	5.3049585706773e-06
ENSG00000256261	AC104698.1	-0.400125759530188	9.86342186676902e-08	5.3049585706773e-06
ENSG00000104903	LYL1	0.41373705789867	1.02397086070673e-07	5.48401648953497e-06
ENSG00000261596	CTB-31N19.3	0.57985734503534	1.03612747047956e-07	5.53555534411955e-06
ENSG00000140280	LYSMD2	0.461839033905841	1.05696623432654e-07	5.63311443567543e-06
ENSG00000177674	AGTRAP	0.49669266698778	1.06876304615282e-07	5.6821268422105e-06
ENSG00000162645	GBP2	0.601209152820409	1.07145544157659e-07	5.68261477036167e-06
ENSG00000183638	RP1L1	1.10334380721689	1.11249574704267e-07	5.88599142097563e-06
ENSG00000143753	DEGS1	0.352885170604873	1.12575663577919e-07	5.94176527739396e-06
ENSG00000213626	LBH	-0.401249887235175	1.16499002481476e-07	6.13402338125958e-06
ENSG00000269053	CTD-2521M24.8	0.720195948870611	1.19203932747103e-07	6.26135849629077e-06
ENSG00000160208	RRP1B	-0.324556378592556	1.23350126137819e-07	6.46360577035369e-06
ENSG00000263276	RP11-96D1.10	-0.382399832119343	1.24006695510643e-07	6.48246484115564e-06
ENSG00000086065	CHMP5	0.769763736260826	1.29437063103184e-07	6.75018917868178e-06
ENSG00000070061	IKBKAP	-0.34146607459436	1.31098351858678e-07	6.82054782491424e-06
ENSG00000188404	SELL	0.585407459911211	1.31435749343131e-07	6.82185880973099e-06
ENSG00000151364	KCTD14	1.1027577865737	1.32373979366416e-07	6.82255565720036e-06
ENSG00000175471	MCTP1	0.547418725155325	1.32327722482043e-07	6.82255565720036e-06
ENSG00000213073	RP11-288H12.3	0.636856706138529	1.32385867862018e-07	6.82255565720036e-06
ENSG00000269220	LINC00528	0.419228374573335	1.33652914820214e-07	6.87164668643882e-06
ENSG00000232133	IMPDH1P10	0.53509701192095	1.34034148167309e-07	6.8750708253612e-06
ENSG00000243055	GK-AS1	0.730394342852681	1.35228740641917e-07	6.92010119851648e-06
ENSG00000156650	KAT6B	-0.405431328656097	1.37247794777984e-07	7.0070129992844e-06
ENSG00000082516	GEMIN5	-0.448283453107092	1.38563936697747e-07	7.05771697152092e-06
ENSG00000158869	FCER1G	0.534738314551379	1.40083585280028e-07	7.11852656268345e-06
ENSG00000258659	TRIM34	0.437183423160251	1.41172753726829e-07	7.15722933105555e-06
ENSG00000102057	KCND1	0.636359743701589	1.42436941495874e-07	7.20460557552394e-06
ENSG00000255337	RP11-315O6.1	0.977563151188911	1.43747146697989e-07	7.25408522516802e-06
ENSG00000104490	NCALD	-0.552224316068424	1.48431167726894e-07	7.45602171494334e-06
ENSG00000261471	RP11-61F12.1	0.646018229240225	1.48316374632551e-07	7.45602171494334e-06
ENSG00000105610	KLF1	0.821535092659865	1.49904721826984e-07	7.51277081798494e-06
ENSG00000110108	TMEM109	-0.341110807130586	1.50604620205409e-07	7.53057564326865e-06
ENSG00000129673	AANAT	0.845033630971009	1.5212992375455e-07	7.58947708666822e-06
ENSG00000100911	PSME2	0.477870403230105	1.52787871697694e-07	7.60493800561804e-06
ENSG00000228203	RNF144A-AS1	0.819318468310043	1.53998778527314e-07	7.63044741405973e-06
ENSG00000231123	SPATA20P1	0.819850028235908	1.53697798980698e-07	7.63044741405973e-06
ENSG00000189241	TSPYL1	-0.259468775215191	1.63926684654691e-07	8.10398639454671e-06
ENSG00000248385	TARM1	1.06792938037032	1.66365215917875e-07	8.20597366370539e-06
ENSG00000109743	BST1	0.561124313441178	1.67510535112342e-07	8.24385743860312e-06
ENSG00000148926	ADM	0.701473407784712	1.68967577249227e-07	8.29687759656824e-06
ENSG00000251139	RP11-701P16.2	0.91472739447172	1.69495135150568e-07	8.30412152057188e-06
ENSG00000241721	SUMO1P1	0.909399825409297	1.71333088190112e-07	8.37538995535151e-06
ENSG00000172232	AZU1	1.01284702609632	1.7727420316987e-07	8.63540426772746e-06
ENSG00000182670	TTC3	-0.36704581301484	1.7744252053497e-07	8.63540426772746e-06
ENSG00000234571	RP5-998N21.4	1.07101755672628	1.80294937274805e-07	8.75472149864837e-06
ENSG00000187097	ENTPD5	-0.284097204257506	1.82543858670579e-07	8.8442701902679e-06
ENSG00000105639	JAK3	0.453035298369735	1.84351803923675e-07	8.9121045741952e-06
ENSG00000116717	GADD45A	0.637587975763087	1.88747233336675e-07	9.10444987999928e-06
ENSG00000167207	NOD2	0.569540077731653	1.9097959931287e-07	9.19183970173022e-06
ENSG00000146955	RAB19	0.748596028233667	1.96543297566e-07	9.41813069104096e-06
ENSG00000197301	RP11-366L20.2	0.991643189042353	1.96202668241628e-07	9.41813069104096e-06
ENSG00000267538	AC004799.3	1.03930865015902	1.9786232071691e-07	9.46058986867659e-06
ENSG00000268965	AC061992.1	0.829146616642672	1.98624226260094e-07	9.4762837729461e-06
ENSG00000168781	PPIP5K1	-0.3584527263807	2.03354424490097e-07	9.68082250442942e-06
ENSG00000131378	RFTN1	-0.311428336629756	2.06977243208693e-07	9.81763326627539e-06
ENSG00000155629	PIK3AP1	0.542222118477937	2.07126856242413e-07	9.81763326627539e-06
ENSG00000135378	PRRG4	0.702987574145827	2.15705990193365e-07	1.02021463024139e-05
ENSG00000162946	DISC1	0.534623046751982	2.1689848941575e-07	1.02363906959472e-05
ENSG00000148346	LCN2	1.02971059430623	2.18009427104779e-07	1.02666465337641e-05
ENSG00000165029	ABCA1	0.664652908206556	2.26240183621059e-07	1.06313424780726e-05
ENSG00000075856	SART3	-0.234942260688378	2.26906162251505e-07	1.06397565479778e-05
ENSG00000100226	GTPBP1	0.480815657586652	2.2956976264023e-07	1.07416036048215e-05
ENSG00000102010	BMX	0.840656527112062	2.31013735167131e-07	1.07860707844807e-05
ENSG00000188921	PTPLAD2	0.399880018881031	2.3765755130152e-07	1.10726122675683e-05
ENSG00000114450	GNB4	0.604499916524314	2.43467426762084e-07	1.13191632812304e-05
ENSG00000162614	NEXN	0.726360710858049	2.47623451578346e-07	1.14879406378735e-05
ENSG00000242525	OR7E100P	0.873717231652463	2.55507691828859e-07	1.18285986740517e-05
ENSG00000132109	TRIM21	0.532641708458488	2.5659811271668e-07	1.18539648223513e-05
ENSG00000170989	S1PR1	-0.453959795291358	2.58397733636679e-07	1.19119174634917e-05
ENSG00000217555	CKLF	0.51667001624612	2.615089665937e-07	1.2029963008503e-05
ENSG00000134905	CARS2	0.404943578890683	2.63347279674218e-07	1.20637346083047e-05
ENSG00000239887	C1orf226	0.938900791228974	2.62811524002158e-07	1.20637346083047e-05
ENSG00000073849	ST6GAL1	-0.372502408924661	2.71435150726194e-07	1.23823162390774e-05
ENSG00000101608	MYL12A	0.320338631928241	2.713379845148e-07	1.23823162390774e-05
ENSG00000133063	CHIT1	0.958064080001258	2.73155087422238e-07	1.24348162817986e-05
ENSG00000185168	LINC00482	0.730534652668515	2.80943107475033e-07	1.2762760585108e-05
ENSG00000115604	IL18R1	0.846472456781007	2.85377342268736e-07	1.2937303539241e-05
ENSG00000081177	EXD2	-0.411415408286949	2.87198988544576e-07	1.29929298109473e-05
ENSG00000240890	RP11-65E22.2	0.865398694323883	2.87872449640805e-07	1.29964894568207e-05
ENSG00000120051	CCDC147	0.737276986674339	2.89704845427871e-07	1.30522486132874e-05
ENSG00000214212	C19orf38	0.450633814130577	2.92564446922463e-07	1.31539624067958e-05
ENSG00000137124	ALDH1B1	-0.41012448111399	3.00777927318004e-07	1.34954794452273e-05
ENSG00000167986	DDB1	-0.338166810681081	3.08492458287182e-07	1.381325554515e-05
ENSG00000168792	ABHD15	-0.354585285709962	3.1118573528189e-07	1.38205680927735e-05
ENSG00000178999	AURKB	0.738753006758348	3.11081941861846e-07	1.38205680927735e-05
ENSG00000187775	DNAH17	0.689347627501693	3.10117276904391e-07	1.38205680927735e-05
ENSG00000237135	RP11-330O11.2	0.965853067172116	3.10057747532146e-07	1.38205680927735e-05
ENSG00000175800	OR52B3P	0.951084584749402	3.13826755328756e-07	1.39095911372995e-05
ENSG00000013374	NUB1	0.4771881970371	3.34109546997001e-07	1.47785986061366e-05
ENSG00000167705	RILP	0.516629688987227	3.35265160983292e-07	1.47997556215069e-05
ENSG00000086548	CEACAM6	1.03276682058338	3.36983837541989e-07	1.48456327301008e-05
ENSG00000269711	CTD-3214H19.16	0.36021644108009	3.42486247104863e-07	1.50576800512844e-05
ENSG00000102974	CTCF	-0.322878295281223	3.46694246273781e-07	1.52120802717437e-05
ENSG00000124785	NRN1	0.998262168423142	3.50147567541856e-07	1.53328146259661e-05
ENSG00000250264	TAP2	0.515522716904467	3.52102198593896e-07	1.53875702829505e-05
ENSG00000137198	GMPR	0.673324362062104	3.5549884819342e-07	1.5505000662424e-05
ENSG00000070756	PABPC1	-0.271001500485618	3.5748214562037e-07	1.55295076818106e-05
ENSG00000187554	TLR5	0.61161073284452	3.57154595189547e-07	1.55295076818106e-05
ENSG00000139618	BRCA2	0.668056061676019	3.6009124602857e-07	1.55808986474659e-05
ENSG00000224940	PRRT4	0.96308007695481	3.59852332481816e-07	1.55808986474659e-05
ENSG00000173681	CXorf23	0.32313107265975	3.64478367489489e-07	1.57395589091162e-05
ENSG00000250608	RP11-933H2.4	0.818544522402796	3.66766428107596e-07	1.58071266678088e-05
ENSG00000160710	ADAR	0.540856769754665	3.74175642190867e-07	1.60630883251722e-05
ENSG00000179409	GEMIN4	-0.334323799542341	3.73767070771146e-07	1.60630883251722e-05
ENSG00000173221	GLRX	0.476834193760303	3.75720270693911e-07	1.60977718332013e-05
ENSG00000143157	POGK	-0.257049536583706	3.871134583457e-07	1.65534563176358e-05
ENSG00000059573	ALDH18A1	-0.425663795856444	3.91788035806812e-07	1.67206257234661e-05
ENSG00000267387	CTD-2240E14.4	0.57758690710907	4.0308402923806e-07	1.71691795767658e-05
ENSG00000205786	AC002511.1	0.852018084730549	4.04597806757393e-07	1.72001297187856e-05
ENSG00000128908	INO80	-0.233266452581373	4.08359785287446e-07	1.7292770675031e-05
ENSG00000230454	U73166.2	0.647395918414819	4.08065737161045e-07	1.7292770675031e-05
ENSG00000001497	LAS1L	-0.303880320235964	4.12907089484571e-07	1.74515141437667e-05
ENSG00000121316	PLBD1	0.567391497975336	4.16021863601916e-07	1.75492157173078e-05
ENSG00000152022	LIX1L	-0.279617766352582	4.18717293356342e-07	1.76288855050663e-05
ENSG00000162714	ZNF496	0.565361277712586	4.23050018274147e-07	1.77770499025161e-05
ENSG00000155229	MMS19	-0.254081764430723	4.46138286441497e-07	1.87112623743439e-05
ENSG00000236936	RP3-329E20.2	0.715802063040801	4.4945790591063e-07	1.88143768238567e-05
ENSG00000106070	GRB10	0.843985701566862	4.56689125315003e-07	1.90441108344621e-05
ENSG00000124469	CEACAM8	1.0195551403658	4.560666310496e-07	1.90441108344621e-05
ENSG00000177820	AC004917.1	0.679857700194429	4.60536279184739e-07	1.9167958545649e-05
ENSG00000197694	SPTAN1	-0.376804474350033	4.61479472908692e-07	1.9170699548532e-05
ENSG00000068784	SRBD1	0.468194354714366	4.63812239197209e-07	1.91946235581406e-05
ENSG00000183621	ZNF438	0.577691658945093	4.63015562345292e-07	1.91946235581406e-05
ENSG00000123836	PFKFB2	0.781381128362593	4.68272002588708e-07	1.93425548744156e-05
ENSG00000146122	DAAM2	1.04278684411537	4.76403895334547e-07	1.96312520491404e-05
ENSG00000166803	KIAA0101	0.925930977071303	4.78205548200261e-07	1.96312520491404e-05
ENSG00000170962	PDGFD	-0.666001503321263	4.78854850679228e-07	1.96312520491404e-05
ENSG00000256950	PSMD9	0.251361607960806	4.78814557567545e-07	1.96312520491404e-05
ENSG00000112062	MAPK14	0.543173421219686	4.79905479651086e-07	1.96374805914904e-05
ENSG00000113013	HSPA9	-0.298388774907045	4.85928216891917e-07	1.98467616211314e-05
ENSG00000089737	DDX24	-0.34809573366417	4.89291630697588e-07	1.9936381083218e-05
ENSG00000236345	RP11-59D5__B.2	0.710923889863273	4.89947217138258e-07	1.9936381083218e-05
ENSG00000138621	PPCDC	0.466059359484139	4.91320417204239e-07	1.99550974652971e-05
ENSG00000225431	AP001626.1	1.03986813774807	4.94363091949584e-07	2.00414247164942e-05
ENSG00000196295	AC005154.6	0.306260613689345	5.15206342612534e-07	2.08477292452342e-05
ENSG00000257034	AL021707.2	0.544474279494274	5.20810237371247e-07	2.10355351142313e-05
ENSG00000124224	PPP4R1L	0.458653111767255	5.2182265323641e-07	2.10375402137801e-05
ENSG00000211689	TRGC1	-0.740269834565866	5.22991225946929e-07	2.10458218750761e-05
ENSG00000198821	CD247	-0.410278381444541	5.35924334286475e-07	2.14871240889794e-05
ENSG00000198829	SUCNR1	1.00793960580822	5.35868164164023e-07	2.14871240889794e-05
ENSG00000102794	IRG1	1.03398718812216	5.48403098492882e-07	2.19471723537875e-05
ENSG00000136315	RP11-84C10.2	0.869023141344869	5.54993272296953e-07	2.21640431310592e-05
ENSG00000175928	LRRN1	0.770853842726483	5.55850791076858e-07	2.21640431310592e-05
ENSG00000143545	RAB13	0.768548992535217	5.60777321659525e-07	2.23028784983427e-05
ENSG00000258521	RP11-638I2.9	0.823669260810218	5.61373995427599e-07	2.23028784983427e-05
ENSG00000125510	OPRL1	0.485885256315933	5.80263063807167e-07	2.30000243026443e-05
ENSG00000126858	RHOT1	0.439324287023706	5.81026653931613e-07	2.30000243026443e-05
ENSG00000048342	CC2D2A	0.586766090461498	5.84662647487049e-07	2.3076849324955e-05
ENSG00000104320	NBN	0.477330660527276	5.85079608531649e-07	2.3076849324955e-05
ENSG00000070190	DAPP1	0.535666496044293	5.90695172809394e-07	2.32563607586632e-05
ENSG00000122490	PQLC1	0.343164167924955	5.9369780671232e-07	2.33325373641563e-05
ENSG00000129559	NEDD8	0.240488825375311	5.96853727237119e-07	2.34144538489377e-05
ENSG00000135441	BLOC1S1	0.406866412916536	5.98549211400162e-07	2.34388867711558e-05
ENSG00000198518	HIST1H4E	0.741113893601166	6.08100854634189e-07	2.37278781689494e-05
ENSG00000198814	GK	0.632233731950821	6.07232239601842e-07	2.37278781689494e-05
ENSG00000124160	NCOA5	-0.2213585977356	6.09911756088793e-07	2.3756117258995e-05
ENSG00000152242	C18orf25	0.4979122819101	6.11736906771399e-07	2.3784809875199e-05
ENSG00000072736	NFATC3	-0.343076704237046	6.18601723836964e-07	2.40089986990435e-05
ENSG00000187475	HIST1H1T	0.92334181537523	6.22462698474794e-07	2.41160149368311e-05
ENSG00000089505	CMTM1	0.608876771963657	6.27874933608801e-07	2.42826463261697e-05
ENSG00000166197	NOLC1	-0.350235860383769	6.39643439332961e-07	2.46940791393366e-05
ENSG00000197697	HIST1H2BE	0.947000287787845	6.41358067718487e-07	2.47166051811581e-05
ENSG00000178927	C17orf62	0.416000547724747	6.58368898347978e-07	2.53274978834536e-05
ENSG00000172123	SLFN12	0.585375872031569	6.59694993455382e-07	2.53339108998129e-05
ENSG00000168961	LGALS9	0.634025142611275	6.66008696338461e-07	2.55315017959504e-05
ENSG00000184678	HIST2H2BE	0.630286582589738	6.68120941814544e-07	2.5567619438861e-05
ENSG00000117868	ESYT2	-0.28648921920327	6.70420844570791e-07	2.56107795012524e-05
ENSG00000244482	LILRA6	0.575803878644672	6.72526675970943e-07	2.56463881267732e-05
ENSG00000093009	CDC45	0.907508254360249	6.74091121488618e-07	2.56612632328359e-05
ENSG00000108861	DUSP3	0.43966497108178	6.8717316138734e-07	2.61137752164778e-05
ENSG00000100024	UPB1	0.637750260403636	7.08684340956769e-07	2.67914559416027e-05
ENSG00000130054	FAM155B	1.02225177489352	7.06883871705249e-07	2.67914559416027e-05
ENSG00000269208	AC139495.1	0.825496584657629	7.07559824923773e-07	2.67914559416027e-05
ENSG00000106605	BLVRA	0.598964503421074	7.32838986256566e-07	2.76567611203665e-05
ENSG00000006744	ELAC2	-0.293418080190648	7.35055095622383e-07	2.76925670593874e-05
ENSG00000174231	PRPF8	-0.354019267718483	7.38482511421869e-07	2.77738061223395e-05
ENSG00000101342	C20orf118	0.432536521666299	7.5898526088763e-07	2.84958538413327e-05
ENSG00000181800	CELF2-AS1	0.685177304773119	7.71982113650335e-07	2.89341014843456e-05
ENSG00000164430	MB21D1	0.407878652640782	7.73579814238741e-07	2.8944336508443e-05
ENSG00000094804	CDC6	0.851786124788209	7.79447390552939e-07	2.91140255230295e-05
ENSG00000084463	WBP11	-0.278398607705176	7.81747823107814e-07	2.91501223254758e-05
ENSG00000117834	SLC5A9	0.788150735616176	7.90454083413136e-07	2.94245522600689e-05
ENSG00000124203	ZNF831	-0.435482981937396	7.93170129363857e-07	2.94754430216491e-05
ENSG00000102554	KLF5	0.67466131749014	8.03680962726953e-07	2.9815335681743e-05
ENSG00000105948	TTC26	0.825180735537674	8.15145503907989e-07	3.01893972981245e-05
ENSG00000180316	PNPLA1	0.651073854479177	8.35388499347014e-07	3.08867582051296e-05
ENSG00000236525	AC007278.2	0.827792679320822	8.55930070005096e-07	3.1592783715678e-05
ENSG00000130222	GADD45G	0.637097976095438	8.58138652913954e-07	3.16208898900891e-05
ENSG00000170145	SIK2	-0.250090249621588	8.61240998628868e-07	3.16817795640394e-05
ENSG00000196684	HSH2D	0.582772282809875	8.72316705566037e-07	3.20352812324764e-05
ENSG00000184557	SOCS3	0.719519944409535	8.75551804304575e-07	3.20463693062969e-05
ENSG00000185262	FAM100B	0.473337287334139	8.75078561896392e-07	3.20463693062969e-05
ENSG00000165733	BMS1	-0.308331572606983	8.83510501735237e-07	3.22835919287904e-05
ENSG00000132963	POMP	0.417204486295583	8.92431245749663e-07	3.25551171133153e-05
ENSG00000095319	NUP188	-0.352097712291301	8.95899938027207e-07	3.26271825763875e-05
ENSG00000069248	NUP133	-0.331961024881336	9.029539910508e-07	3.27748299974269e-05
ENSG00000206344	HCG27	0.620892396074653	9.02924275493103e-07	3.27748299974269e-05
ENSG00000141574	SECTM1	0.612476752117128	9.05078256979343e-07	3.27974543835085e-05
ENSG00000253276	CCDC71L	0.59197553330822	9.26360058766374e-07	3.35130689471921e-05
ENSG00000143774	GUK1	0.400639676766368	9.29963244375897e-07	3.35323875459698e-05
ENSG00000232912	RP5-1115A15.1	0.621649876577318	9.2936813383116e-07	3.35323875459698e-05
ENSG00000090621	PABPC4	-0.269895361195836	9.58318048994161e-07	3.44978709861144e-05
ENSG00000174684	B3GNT1	-0.385534683126586	9.6427169256554e-07	3.46550999247527e-05
ENSG00000111052	LIN7A	0.600291486578845	9.66497609632879e-07	3.46780611955469e-05
ENSG00000249173	RP11-701P16.4	1.01339795691274	9.6871860816534e-07	3.47007709951161e-05
ENSG00000133216	EPHB2	0.849541171370864	9.88315379968571e-07	3.52976085312031e-05
ENSG00000175793	SFN	0.771309965130219	9.90105136611608e-07	3.52976085312031e-05
ENSG00000207939	MIR223	0.625909880922637	9.90226261023636e-07	3.52976085312031e-05
ENSG00000267648	RP11-686D22.3	0.639217362968701	1.00698920436054e-06	3.58366793232608e-05
ENSG00000012223	LTF	0.982247366952684	1.02971425738642e-06	3.65858312815458e-05
ENSG00000235865	GSN-AS1	0.557018537677352	1.05612338175905e-06	3.74632337902874e-05
ENSG00000111666	CHPT1	0.487948873647988	1.07033351490598e-06	3.78586849291039e-05
ENSG00000170909	OSCAR	0.529741422602756	1.07073668418773e-06	3.78586849291039e-05
ENSG00000088298	EDEM2	0.316098489703877	1.08719007825125e-06	3.83783366718385e-05
ENSG00000163399	ATP1A1	-0.337991560762577	1.08913563469705e-06	3.83850044415568e-05
ENSG00000164104	HMGB2	0.662051364989857	1.09479587951634e-06	3.85223587170878e-05
ENSG00000104518	GSDMD	0.339071871878877	1.11113401677085e-06	3.8930925518186e-05
ENSG00000138190	EXOC6	0.497015989897599	1.11175220920544e-06	3.8930925518186e-05
ENSG00000189091	SF3B3	-0.342915220043796	1.11164912604349e-06	3.8930925518186e-05
ENSG00000149516	MS4A3	0.946691168969722	1.13175927540105e-06	3.95049072312911e-05
ENSG00000206337	HCP5	0.298395011453683	1.13162735957244e-06	3.95049072312911e-05
ENSG00000130803	ZNF317	-0.230785113941168	1.1412878634384e-06	3.97739730526196e-05
ENSG00000164105	SAP30	0.629390708195778	1.16066503944966e-06	4.03848595175391e-05
ENSG00000137501	SYTL2	-0.564706610293489	1.17501766037211e-06	4.08192542079349e-05
ENSG00000214659	KRT8P26	0.893065824020729	1.18700799860699e-06	4.11703361548594e-05
ENSG00000169607	CKAP2L	0.865218266966552	1.21670595858757e-06	4.21335053900112e-05
ENSG00000155307	SAMSN1	0.567829090138546	1.2402555286532e-06	4.28810499313309e-05
ENSG00000143799	PARP1	-0.383579263291551	1.24420709052857e-06	4.29497142735226e-05
ENSG00000066933	MYO9A	-0.369501248097721	1.26556248660438e-06	4.36179903703348e-05
ENSG00000101188	NTSR1	0.725049758641836	1.27762262818913e-06	4.39075751767482e-05
ENSG00000267068	CTD-2562J15.1	0.572857641864029	1.2779835161966e-06	4.39075751767482e-05
ENSG00000064270	ATP2C2	0.808090907841844	1.28197136385182e-06	4.3975441556556e-05
ENSG00000156414	TDRD9	0.685264562111083	1.29017024604591e-06	4.41873198218639e-05
ENSG00000101425	BPI	0.941014279268354	1.307080471827e-06	4.46964247103157e-05
ENSG00000165178	NCF1C	0.599371446878667	1.30914853396729e-06	4.46971947120612e-05
ENSG00000070501	POLB	0.479942890876459	1.3167006375587e-06	4.47452964716876e-05
ENSG00000101266	CSNK2A1	-0.264757030947644	1.31331905475901e-06	4.47452964716876e-05
ENSG00000267102	RP11-686D22.7	0.6674883674538	1.31575417409447e-06	4.47452964716876e-05
ENSG00000238113	RP11-262H14.1	0.623409737438869	1.34300804882634e-06	4.55684299299756e-05
ENSG00000254602	AP000662.4	0.994093116039082	1.36665014154795e-06	4.62987166557584e-05
ENSG00000186185	KIF18B	0.891362510061984	1.39618964101229e-06	4.72262226714544e-05
ENSG00000133169	BEX1	1.00290185277883	1.39987605884596e-06	4.72777306983664e-05
ENSG00000173239	LIPM	1.00880416462735	1.40990453559706e-06	4.75429382829186e-05
ENSG00000172426	RSPH9	0.422017232454205	1.41305336812724e-06	4.75756997641731e-05
ENSG00000135451	TROAP	0.853209022628533	1.41566522946879e-06	4.75903091217269e-05
ENSG00000026103	FAS	0.573944917305369	1.42366493397832e-06	4.77857180835027e-05
ENSG00000078053	AMPH	0.868091823155657	1.42970541636419e-06	4.78003895096083e-05
ENSG00000105426	PTPRS	-0.62759868788648	1.43066471737146e-06	4.78003895096083e-05
ENSG00000237059	AC083863.7	0.691751429381071	1.4283511161049e-06	4.78003895096083e-05
ENSG00000078098	FAP	1.00970898430224	1.43579649379875e-06	4.78986094442694e-05
ENSG00000119401	TRIM32	-0.322419966255626	1.44394116037921e-06	4.80968876454971e-05
ENSG00000085563	ABCB1	-0.600310651656339	1.45802297271334e-06	4.84920243177462e-05
ENSG00000135828	RNASEL	0.393732369916152	1.46364555339596e-06	4.853128829629e-05
ENSG00000181778	TMEM252	0.774803369491312	1.46165986673039e-06	4.853128829629e-05
ENSG00000105711	SCN1B	0.611454762278195	1.48594682419286e-06	4.91960970536941e-05
ENSG00000237568	RP4-620F22.2	0.797951904224556	1.49739039261947e-06	4.94999659139608e-05
ENSG00000091542	ALKBH5	-0.223726269403893	1.50532316774686e-06	4.96870340459767e-05
ENSG00000132581	SDF2	0.269784267003851	1.52643590753518e-06	5.03079200837876e-05
ENSG00000168778	TCTN2	-0.502271330139409	1.53095395747402e-06	5.03808357300673e-05
ENSG00000138674	SEC31A	-0.350721690735268	1.53545954692524e-06	5.04531226464111e-05
ENSG00000149557	FEZ1	-0.743954596308919	1.56116260513478e-06	5.1220666793994e-05
ENSG00000254788	CKLF-CMTM1	0.493940958204398	1.58830004625019e-06	5.20329000159114e-05
ENSG00000157551	KCNJ15	0.638331064267944	1.59685799498342e-06	5.22349461802135e-05
ENSG00000141971	FAM125A	0.371026166213407	1.60953793040976e-06	5.24925571901248e-05
ENSG00000168517	HEXIM2	0.384347231133404	1.60818178273322e-06	5.24925571901248e-05
ENSG00000197043	ANXA6	-0.344879309716474	1.64726454336199e-06	5.3642887536517e-05
ENSG00000167208	SNX20	0.287910788462088	1.66093244176495e-06	5.4007492239592e-05
ENSG00000147140	NONO	-0.18031864386928	1.67647819078629e-06	5.44319835763315e-05
ENSG00000172243	CLEC7A	0.494167606026871	1.6853641775533e-06	5.46393065930522e-05
ENSG00000179222	MAGED1	-0.436890695801709	1.69198689302022e-06	5.47727490361258e-05
ENSG00000186205	MARC1	0.614542978688683	1.69867083160013e-06	5.49077756528026e-05
ENSG00000117118	SDHB	0.242086808720289	1.70403424246192e-06	5.49450910387275e-05
ENSG00000232703	LINC00481	0.639662478028043	1.70485431899031e-06	5.49450910387275e-05
ENSG00000157554	ERG	0.949893236762105	1.73341667763597e-06	5.57833399455428e-05
ENSG00000250893	RP11-588L15.2	0.822602530960228	1.73630364282265e-06	5.57940748519379e-05
ENSG00000127804	METTL16	-0.296498776042748	1.74194574304108e-06	5.58931812499127e-05
ENSG00000137449	CPEB2	0.593430537618417	1.76770114951887e-06	5.66364190881773e-05
ENSG00000085063	CD59	0.495677477555731	1.78604016966399e-06	5.7140210464609e-05
ENSG00000166428	PLD4	-0.675010443456634	1.79468645462084e-06	5.73223228795284e-05
ENSG00000235602	POU5F1P3	0.505610646774424	1.79697913928319e-06	5.73223228795284e-05
ENSG00000145907	G3BP1	-0.247556310850532	1.80947622932426e-06	5.76368295728345e-05
ENSG00000169375	SIN3A	-0.31339350542309	1.81271791102891e-06	5.76560394088685e-05
ENSG00000172936	MYD88	0.456103107982225	1.81633164539819e-06	5.76870098598775e-05
ENSG00000088812	ATRN	-0.351261580324441	1.82121420689151e-06	5.77581300940296e-05
ENSG00000105048	TNNT1	0.888860379930163	1.83314465864686e-06	5.79682256672831e-05
ENSG00000250318	CTA-963H5.5	0.553683276746126	1.83088417424109e-06	5.79682256672831e-05
ENSG00000130812	ANGPTL6	0.469060979589332	1.84128676975325e-06	5.81415566558936e-05
ENSG00000249138	RP11-701P16.1	0.820626720707951	1.84649458999035e-06	5.82218662133898e-05
ENSG00000115159	GPD2	0.438123326716978	1.87308813963984e-06	5.89752866560087e-05
ENSG00000126016	AMOT	-0.536216612441358	1.88602046116627e-06	5.92970260387687e-05
ENSG00000150782	IL18	0.469115859495671	1.89591472164022e-06	5.95224606071271e-05
ENSG00000258311	RP11-644F5.10	0.345066712509115	1.92112802418393e-06	6.02275013722283e-05
ENSG00000158050	DUSP2	-0.558361899288683	1.92676435891189e-06	6.03176619005499e-05
ENSG00000133067	LGR6	-0.695328776680933	1.9959910497916e-06	6.23954226452022e-05
ENSG00000198695	MT-ND6	-0.594293757609584	2.03911022704113e-06	6.36522822443938e-05
ENSG00000116704	SLC35D1	-0.322797074912748	2.04265676129482e-06	6.36720298017878e-05
ENSG00000178719	GRINA	0.458950467806189	2.04911624428769e-06	6.37823918147155e-05
ENSG00000255835	RP4-559A3.7	-0.248334020373856	2.07228583193349e-06	6.44118317405102e-05
ENSG00000147439	BIN3	0.346427953193477	2.08067800421264e-06	6.45808168608669e-05
ENSG00000114779	ABHD14B	-0.297670782075277	2.09135950959313e-06	6.48202789278291e-05
ENSG00000163393	SLC22A15	0.546892626735334	2.09554967057268e-06	6.48581527644244e-05
ENSG00000115828	QPCT	0.586845903676871	2.10218728423493e-06	6.49715620195437e-05
ENSG00000182541	LIMK2	0.533523989828009	2.13101900083384e-06	6.57696273830793e-05
ENSG00000254549	RP4-541C22.4	0.50376899141018	2.1376359238455e-06	6.58807934724232e-05
ENSG00000151470	C4orf33	0.461037179602898	2.18783164655919e-06	6.73328300126266e-05
ENSG00000198417	MT1F	0.452931489951713	2.2952658787366e-06	7.05398800510176e-05
ENSG00000164096	C4orf3	0.344675615902371	2.33231658669929e-06	7.1548034445457e-05
ENSG00000231528	FAM225A	0.895136360414328	2.33461848700796e-06	7.1548034445457e-05
ENSG00000267745	RP11-686D22.8	0.601653079975043	2.34416073081042e-06	7.17398545223228e-05
ENSG00000138411	HECW2	0.786831598054097	2.36000755268705e-06	7.21238112360345e-05
ENSG00000260361	CTD-2313J17.5	0.638228808588925	2.3714261834481e-06	7.23715552158162e-05
ENSG00000013503	POLR3B	-0.349404025154918	2.39149915393418e-06	7.28203248327332e-05
ENSG00000029153	ARNTL2	0.74454042483907	2.3927963585146e-06	7.28203248327332e-05
ENSG00000239948	Metazoa_SRP	0.816713539809791	2.42575418983184e-06	7.37206603644165e-05
ENSG00000197006	METTL9	0.329854009444216	2.43051617239788e-06	7.37627901153695e-05
ENSG00000198363	ASPH	0.648965013081565	2.51464701443908e-06	7.62101968273346e-05
ENSG00000112245	PTP4A1	0.472549922039264	2.53291719872311e-06	7.65515542313952e-05
ENSG00000166889	PATL1	0.392643297966556	2.53102912884908e-06	7.65515542313952e-05
ENSG00000148600	CDHR1	-0.71607339418835	2.55144335253418e-06	7.7004042599968e-05
ENSG00000171155	C1GALT1C1	0.451044625779383	2.55493711431865e-06	7.7004042599968e-05
ENSG00000117298	ECE1	0.529640852378733	2.56645642481745e-06	7.72446822846917e-05
ENSG00000253193	FCGR1C	0.983415514600586	2.57791563101216e-06	7.73764209522619e-05
ENSG00000261716	RP11-196G18.22	0.441096506667081	2.57476655602808e-06	7.73764209522619e-05
ENSG00000112299	VNN1	0.752571202661311	2.64157638312369e-06	7.91784438239172e-05
ENSG00000198786	MT-ND5	-0.598400725319855	2.67251508872394e-06	7.9996064662612e-05
ENSG00000259379	RP11-925D8.5	0.782837940015715	2.68672502357703e-06	8.03113932834224e-05
ENSG00000178146	RP1-232L22__B.1	0.580969815944645	2.71835791230809e-06	8.09886674625784e-05
ENSG00000187037	GPR141	0.56648404270338	2.72050166663002e-06	8.09886674625784e-05
ENSG00000198589	LRBA	-0.419824642182534	2.71334800788562e-06	8.09886674625784e-05
ENSG00000250687	RP11-497H16.7	0.785102069419659	2.72426081040437e-06	8.09902353308106e-05
ENSG00000244515	KRT18P34	0.681267115992648	2.74545474853401e-06	8.15094180845335e-05
ENSG00000147454	SLC25A37	0.565469310419076	2.7805715520284e-06	8.24399850520659e-05
ENSG00000114698	PLSCR4	0.978385295422776	2.80546353251617e-06	8.30652894973047e-05
ENSG00000163636	PSMD6	0.235873833647884	2.82494155294122e-06	8.35288198556407e-05
ENSG00000131979	GCH1	0.548985159297181	2.83178886362282e-06	8.36181330527326e-05
ENSG00000090530	LEPREL1	-0.770260112143941	2.89219318197825e-06	8.47148970769527e-05
ENSG00000135404	CD63	0.392269194822325	2.88852470840966e-06	8.47148970769527e-05
ENSG00000160446	ZDHHC12	0.351405510776751	2.88895424369637e-06	8.47148970769527e-05
ENSG00000168916	ZNF608	0.792580312310731	2.88929605998673e-06	8.47148970769527e-05
ENSG00000186566	GPATCH8	-0.258694717420059	2.873527916933e-06	8.47148970769527e-05
ENSG00000259162	RP11-203M5.6	-0.92377235176398	2.88615948308834e-06	8.47148970769527e-05
ENSG00000236333	TRHDE-AS1	0.934459470982365	2.89845648276119e-06	8.47847022822153e-05
ENSG00000128872	TMOD2	0.48563856310724	2.93007217601892e-06	8.54881890904822e-05
ENSG00000198643	FAM3D	-0.893622633131317	2.93033058572931e-06	8.54881890904822e-05
ENSG00000105701	FKBP8	0.500997269497166	2.96791077898631e-06	8.62391202548269e-05
ENSG00000181029	TRAPPC5	0.331884868655834	2.96143983595033e-06	8.62391202548269e-05
ENSG00000255642	RP11-415I12.6	-0.413225675856219	2.96452382161956e-06	8.62391202548269e-05
ENSG00000105501	SIGLEC5	0.643251852680012	2.98060199868939e-06	8.63781621662623e-05
ENSG00000161643	SIGLEC16	0.553767413691163	2.97987759219525e-06	8.63781621662623e-05
ENSG00000198736	MSRB1	0.531297315042537	3.04496844615437e-06	8.80177611306562e-05
ENSG00000204475	NCR3	-0.450228629402438	3.045234882375e-06	8.80177611306562e-05
ENSG00000198700	IPO9	-0.213124484223328	3.06007740841858e-06	8.8329922657007e-05
ENSG00000011422	PLAUR	0.510251568304445	3.11073296089146e-06	8.96049476929007e-05
ENSG00000102897	LYRM1	0.405705711305813	3.11245047361272e-06	8.96049476929007e-05
ENSG00000008256	CYTH3	-0.459215271933626	3.1193158467864e-06	8.96844349580652e-05
ENSG00000215769	hsa-mir-6080	0.37040154258782	3.12608106913279e-06	8.97608376368207e-05
ENSG00000225864	HCG4P11	0.364465771392462	3.14077351449164e-06	9.00643596655603e-05
ENSG00000184012	TMPRSS2	0.931107458658792	3.20288977364292e-06	9.1662501673549e-05
ENSG00000236567	RP11-39K24.7	0.847581474533511	3.20908945953343e-06	9.1662501673549e-05
ENSG00000266820	RP13-104F24.1	0.370239356617924	3.20523508351037e-06	9.1662501673549e-05
ENSG00000116127	ALMS1	-0.360313780046863	3.23793733161284e-06	9.22102191911722e-05
ENSG00000122694	GLIPR2	0.40398185204418	3.24092482443917e-06	9.22102191911722e-05
ENSG00000139890	REM2	0.606353836147006	3.23937171472174e-06	9.22102191911722e-05
ENSG00000062524	LTK	-0.652968909854071	3.26269004702817e-06	9.27087649123701e-05
ENSG00000087157	PGS1	0.498198619782177	3.3051140741903e-06	9.3792269656016e-05
ENSG00000108950	FAM20A	0.519868791626187	3.31303942638677e-06	9.38952328222793e-05
ENSG00000196668	LINC00173	0.519346162908587	3.32164587657551e-06	9.40172073174241e-05
ENSG00000267632	RP11-400F19.18	0.589588361132546	3.32990364554739e-06	9.41290097785977e-05
ENSG00000213722	DDAH2	0.439300230751707	3.33894452188556e-06	9.42626314570043e-05
ENSG00000110801	PSMD9	0.202192437308963	3.36184138199234e-06	9.47865755327932e-05
ENSG00000131203	IDO1	0.866486989113786	3.36876288403333e-06	9.48593270348098e-05
ENSG00000170873	MTSS1	-0.413404087532293	3.40651152396814e-06	9.57988202190833e-05
ENSG00000149474	CSRP2BP	-0.263876174608857	3.42145486199802e-06	9.60953858477105e-05
ENSG00000100335	SMCR7L	-0.183632606312531	3.43509149617337e-06	9.63545369485037e-05
ENSG00000173402	DAG1	-0.259690340805499	3.45017742945727e-06	9.66536243731676e-05
ENSG00000204642	HLA-F	0.35921577758243	3.46435642034379e-06	9.6926571243191e-05
ENSG00000007968	E2F2	0.577347928396414	3.49547148308329e-06	9.76720554691214e-05
ENSG00000005001	PRSS22	-0.909838067832915	3.5294616103884e-06	9.84470433961709e-05
ENSG00000138185	ENTPD1	0.470915652029856	3.53221738238973e-06	9.84470433961709e-05
ENSG00000157800	SLC37A3	0.546216833326857	3.54855668565834e-06	9.86507788019344e-05
ENSG00000232680	AC002511.3	0.721162721110297	3.54676551374665e-06	9.86507788019344e-05
ENSG00000171101	SIGLEC17P	-0.666485676100858	3.55352114733954e-06	9.86632663157767e-05
ENSG00000107742	SPOCK2	-0.391892245240086	3.5757853356368e-06	9.91554382855326e-05
ENSG00000173890	GPR160	0.546664883829895	3.62932639691793e-06	0.000100512561595759
ENSG00000202198	RN7SK	0.604136634712459	3.66320902196537e-06	0.000101322506758184
ENSG00000225411	RP11-764K9.1	0.671709037150364	3.67253011294511e-06	0.000101451903284404
ENSG00000165943	MOAP1	-0.246033456299633	3.67950826653379e-06	0.000101516332237411
ENSG00000241945	PWP2	-0.263291493727267	3.69979576924327e-06	0.000101947335881128
ENSG00000072571	HMMR	0.920129835522965	3.7334559620534e-06	0.000102745272325981
ENSG00000159882	ZNF230	0.471034482943096	3.76557020622811e-06	0.000103498710158856
ENSG00000214797	RP11-1036E20.9	-0.749314074348904	3.80418299055864e-06	0.000104428646390323
ENSG00000158467	AHCYL2	-0.292595525454089	3.8264607631388e-06	0.000104908399166055
ENSG00000163486	SRGAP2	0.529668860396824	3.83894098222553e-06	0.000105118670930589
ENSG00000003400	CASP10	0.319955589625429	3.85132469349524e-06	0.000105325777068291
ENSG00000231680	AP003774.6	0.612246021533183	3.88575274800724e-06	0.000106134479120883
ENSG00000115457	IGFBP2	0.923961617942333	3.90382383445402e-06	0.000106494949571354
ENSG00000234436	AC008984.7	0.866010815425543	3.96962476391873e-06	0.00010815495101794
ENSG00000165030	NFIL3	0.590813059404913	4.01762898355867e-06	0.000109326539127946
ENSG00000160007	ARHGAP35	-0.294565340806492	4.04110428580155e-06	0.000109730438946088
ENSG00000180061	TMEM150B	0.563789349200139	4.04251537007922e-06	0.000109730438946088
ENSG00000027075	PRKCH	-0.356651168865779	4.10421965889507e-06	0.000111267126261186
ENSG00000112773	FAM46A	0.457408910712852	4.11069719658824e-06	0.000111304639953717
ENSG00000100985	MMP9	0.763323125940858	4.1317772952373e-06	0.000111736962473057
ENSG00000144848	ATG3	0.407074088478766	4.16890451932653e-06	0.000112601647282823
ENSG00000086506	HBQ1	0.662197419291898	4.17923542676936e-06	0.000112646001566689
ENSG00000136026	CKAP4	0.513359607801756	4.18085704409796e-06	0.000112646001566689
ENSG00000169239	CA5B	-0.300494587599912	4.22103012658887e-06	0.00011344862152041
ENSG00000171848	RRM2	0.856096135964332	4.21944244359813e-06	0.00011344862152041
ENSG00000136811	ODF2	-0.241272791418707	4.25147266794451e-06	0.000114126448731272
ENSG00000135655	USP15	0.490541578208752	4.26858394631893e-06	0.000114445187498178
ENSG00000179818	PCBP1-AS1	0.35905931188629	4.29311819515022e-06	0.00011496191872822
ENSG00000003402	CFLAR	0.480207091177692	4.32883583672742e-06	0.000115776489434921
ENSG00000145365	TIFA	0.483684383565356	4.3362284892285e-06	0.00011583243119576
ENSG00000139617	RP11-298P3.4	0.503977846187073	4.35497687977997e-06	0.000116191208547097
ENSG00000138002	IFT172	-0.342686265030641	4.36863406621596e-06	0.000116271647966973
ENSG00000260539	RP11-252A24.7	-0.340209365117271	4.36439892044419e-06	0.000116271647966973
ENSG00000107077	KDM4C	-0.256161956456892	4.40089870407985e-06	0.000116953989004837
ENSG00000164509	IL31RA	0.819713512079799	4.40497610868978e-06	0.000116953989004837
ENSG00000069702	TGFBR3	-0.564204706354604	4.44362002458538e-06	0.000117802557719159
ENSG00000135424	ITGA7	0.643172621681632	4.45311027760857e-06	0.000117802557719159
ENSG00000171700	RGS19	0.362476712057965	4.44777379078228e-06	0.000117802557719159
ENSG00000223799	AP000295.7	0.293352914028403	4.48969960597831e-06	0.000118626875562554
ENSG00000030110	BAK1	0.381544910815541	4.56017782182939e-06	0.000120198366206024
ENSG00000130559	CAMSAP1	-0.267765267803502	4.55863724015717e-06	0.000120198366206024
ENSG00000125166	GOT2	-0.307311562217811	4.65777938367899e-06	0.000122475496164584
ENSG00000246430	RP11-16M8.2	0.687376221818686	4.65341238906135e-06	0.000122475496164584
ENSG00000163875	MEAF6	-0.20862530809996	4.67375881584682e-06	0.000122747961400323
ENSG00000176597	B3GNT5	0.583266994900626	4.70568651767314e-06	0.00012320407881585
ENSG00000224186	CTC-203F4.1	0.421102179991773	4.69994553566762e-06	0.00012320407881585
ENSG00000227032	RP11-34E5.4	0.862295166582144	4.70804108787856e-06	0.00012320407881585
ENSG00000010610	CD4	-0.488523244604574	4.72499621857849e-06	0.000123499871258563
ENSG00000024526	DEPDC1	0.946766597627781	4.75355309911858e-06	0.000124097836044015
ENSG00000076685	NT5C2	0.440425436382949	4.84407697113649e-06	0.000126310174100601
ENSG00000198355	PIM3	0.413680184480789	4.86278671621853e-06	0.00012664690409546
ENSG00000265118	CTD-2370N5.3	0.403974969154775	4.87195012966251e-06	0.000126734502718161
ENSG00000264558	RP11-138C9.1	0.437974961849609	4.88828708535251e-06	0.000127008277172459
ENSG00000133706	LARS	-0.271566116127952	4.90964332312128e-06	0.000127411658258341
ENSG00000087253	LPCAT2	0.535813854331981	4.93887855280969e-06	0.000128018309913932
ENSG00000008394	MGST1	0.480593541495287	4.95028283776265e-06	0.000128161884227431
ENSG00000089220	PEBP1	-0.351528559902478	4.98082703548781e-06	0.00012880006100881
ENSG00000197818	SLC9A8	0.457883186729285	4.98781375601863e-06	0.000128828272320051
ENSG00000030066	NUP160	-0.281257307097826	5.03111458319841e-06	0.000129793252370093
ENSG00000138433	CIR1	0.397100738845683	5.04901646379024e-06	0.000129823851543196
ENSG00000204020	LIPN	0.722206364278454	5.04237799423445e-06	0.000129823851543196
ENSG00000219626	FAM228B	0.344240035799879	5.05012465387013e-06	0.000129823851543196
ENSG00000104043	ATP8B4	0.596622685640256	5.08712656965385e-06	0.000130315126229199
ENSG00000114737	CISH	0.469136426716948	5.08645463567242e-06	0.000130315126229199
ENSG00000156500	FAM122C	0.354108158579137	5.08171715037558e-06	0.000130315126229199
ENSG00000210194	J01415.20	-0.69615675786086	5.10203688150702e-06	0.000130499281174119
ENSG00000261015	RP1-90J20.11	0.603297577805506	5.10625991505524e-06	0.000130499281174119
ENSG00000174099	MSRB3	0.583809709477326	5.16359610397103e-06	0.000131810442135363
ENSG00000189221	MAOA	0.951345279447419	5.183733950114e-06	0.000132170093983595
ENSG00000168758	SEMA4C	-0.438249447316291	5.19617083159315e-06	0.000132332784197135
ENSG00000140939	NOL3	0.523278634150847	5.28065989254898e-06	0.000134327938663664
ENSG00000174652	ZNF266	-0.405893544489748	5.34679446480487e-06	0.000135852099826106
ENSG00000176809	LRRC37A3	0.465671294426321	5.39606883879357e-06	0.000136944831819371
ENSG00000123838	C4BPA	0.948513071630126	5.40944485760624e-06	0.000137107294189812
ENSG00000141720	PIP4K2B	-0.160873355903705	5.42756896591404e-06	0.000137107294189812
ENSG00000225450	RP3-508I15.14	0.498567247939464	5.42665753773964e-06	0.000137107294189812
ENSG00000238000	RP11-274E7.2	0.499384796086397	5.41921155197268e-06	0.000137107294189812
ENSG00000092820	EZR	-0.321175977371415	5.44621918511233e-06	0.000137419555905184
ENSG00000130340	SNX9	-0.331057611577531	5.45311586023618e-06	0.000137434872735895
ENSG00000138760	SCARB2	0.41951982424274	5.48463959886862e-06	0.000138070115063224
ENSG00000104915	STX10	0.356436021864493	5.50465072497959e-06	0.000138255313783367
ENSG00000147124	ZNF41	-0.329328945067286	5.50179824598338e-06	0.000138255313783367
ENSG00000135604	STX11	0.551961813773019	5.57778400483093e-06	0.000139931295395592
ENSG00000148450	MSRB2	0.501565443592105	5.62442719644937e-06	0.000140778188624989
ENSG00000184182	UBE2F	0.305465782124796	5.62177881333256e-06	0.000140778188624989
ENSG00000068400	GRIPAP1	0.266322436813938	5.69307466201524e-06	0.000142170713645366
ENSG00000197632	SERPINB2	0.629175727937857	5.69097206956513e-06	0.000142170713645366
ENSG00000174282	ZBTB4	-0.304779420456659	5.70030084431275e-06	0.000142188668663331
ENSG00000005381	MPO	0.850179922218692	5.75746313550495e-06	0.000143222330735268
ENSG00000163125	RPRD2	-0.288577733141883	5.76140353834151e-06	0.000143222330735268
ENSG00000172493	AFF1	0.441554983942679	5.76093773101222e-06	0.000143222330735268
ENSG00000264469	RP11-173M1.8	0.414757114142011	5.7692173354043e-06	0.000143253599995363
ENSG00000068366	ACSL4	0.520528901921284	5.81335988845797e-06	0.000143859260388103
ENSG00000181894	ZNF329	-0.351298570795334	5.80726637227724e-06	0.000143859260388103
ENSG00000268500	SIGLEC5	0.625773856417494	5.80049698511586e-06	0.000143859260388103
ENSG00000170915	PAQR8	-0.34046629225482	5.82455782327613e-06	0.000143973317869238
ENSG00000095932	C19orf77	0.682773660785727	5.87029047508913e-06	0.000144776204482136
ENSG00000101412	E2F1	0.567925398472467	5.86482955000544e-06	0.000144776204482136
ENSG00000258730	ITPK1-AS1	0.651954773474402	5.87780843486199e-06	0.000144798187271893
ENSG00000135900	MRPL44	0.29282562551681	5.90905278175717e-06	0.000145240396326407
ENSG00000166736	HTR3A	-0.87200294189416	5.90492229237095e-06	0.000145240396326407
ENSG00000175063	UBE2C	0.632260869868992	5.92846740580405e-06	0.000145553866611488
ENSG00000235328	AC006946.12	0.622294938218507	5.95094149596868e-06	0.000145941664004951
ENSG00000065911	MTHFD2	0.456592247290671	5.96542117708329e-06	0.000146132755762833
ENSG00000164576	SAP30L	0.309417704404249	5.98268981436148e-06	0.000146391663083553
ENSG00000120306	CYSTM1	0.570902905002056	6.04337102972188e-06	0.00014771107423988
ENSG00000139083	ETV6	0.419362478844249	6.14323345400063e-06	0.000149984127601528
ENSG00000163686	ABHD6	-0.317052758497787	6.21363657023117e-06	0.000151411216153899
ENSG00000179918	SEPHS2	0.254072672167289	6.21554440941136e-06	0.000151411216153899
ENSG00000143382	ADAMTSL4	0.547008527298278	6.24658836212334e-06	0.000151997998107747
ENSG00000153283	CD96	-0.382128952871185	6.26183798394512e-06	0.00015219957929609
ENSG00000135829	DHX9	-0.229497509451182	6.40487965896881e-06	0.000155330771840319
ENSG00000234484	RP1-55C23.7	0.590179566945979	6.40246868339813e-06	0.000155330771840319
ENSG00000100908	EMC9	0.338424094745552	6.46857778654375e-06	0.000156573787589406
ENSG00000187741	FANCA	0.276402225031428	6.47046497612164e-06	0.000156573787589406
ENSG00000115271	GCA	0.564856119548801	6.5509859598272e-06	0.000158346896247991
ENSG00000173473	SMARCC1	-0.210701088513698	6.60391088761551e-06	0.000159449786525178
ENSG00000089169	RPH3A	0.843485481958441	6.61363743782896e-06	0.000159508379309052
ENSG00000248099	INSL3	0.59193778475126	6.67419486875498e-06	0.000160791435586731
ENSG00000183955	SETD8	0.252634518023548	6.69986673070306e-06	0.000161232145300212
ENSG00000169230	PRELID1	0.317057690604699	6.74266464612229e-06	0.000162083570057666
ENSG00000182487	NCF1B	0.535366634853776	6.77387829081688e-06	0.000162654961024879
ENSG00000104312	RIPK2	0.354077385307895	6.84296484273177e-06	0.000164133506891912
ENSG00000135966	TGFBRAP1	-0.213849865504275	6.88148875844701e-06	0.000164876546996519
ENSG00000134470	IL15RA	0.416783368914668	6.94121136303765e-06	0.000165581233071764
ENSG00000149136	SSRP1	-0.296297570986369	6.93533194110673e-06	0.000165581233071764
ENSG00000163155	LYSMD1	0.34453001430463	6.9283719738459e-06	0.000165581233071764
ENSG00000188649	CC2D2B	0.66558250862427	6.93041992246213e-06	0.000165581233071764
ENSG00000170837	GPR27	0.56570566014073	6.96602084448167e-06	0.000165991844572267
ENSG00000008438	PGLYRP1	0.715168017229204	7.05799958693666e-06	0.000167855574339519
ENSG00000179978	RP11-1319K7.1	0.600659951134128	7.06128911868497e-06	0.000167855574339519
ENSG00000239306	RBM14	-0.230071964887693	7.06727968479053e-06	0.000167855574339519
ENSG00000124557	BTN1A1	0.666786064566627	7.08318478493838e-06	0.000168050673980118
ENSG00000159110	IFNAR2	0.278732164651114	7.12026935022595e-06	0.000168747294546407
ENSG00000074410	CA12	0.862905370445588	7.14091163913631e-06	0.000169053153008416
ENSG00000132286	FXC1	-0.226115125931085	7.24536669253196e-06	0.00017134037618887
ENSG00000132142	ACACA	-0.288231496750431	7.29804063253946e-06	0.000172399444174724
ENSG00000126861	OMG	0.540898800348492	7.34871211456622e-06	0.000173408972370828
ENSG00000144749	LRIG1	-0.385241908431052	7.37538742188769e-06	0.000173663351891884
ENSG00000185482	STAC3	0.5124589861804	7.36744714959152e-06	0.000173663351891884
ENSG00000102096	PIM2	0.298802273376689	7.3843960061953e-06	0.000173688306922899
ENSG00000255801	RP11-561P12.5	0.816296576949274	7.41442250082342e-06	0.0001742070387801
ENSG00000158470	B4GALT5	0.577164172229512	7.4342457906114e-06	0.000174485182353007
ENSG00000163710	PCOLCE2	0.935712850998633	7.50047541130839e-06	0.000175850738425429
ENSG00000100938	GMPR2	0.293690939314684	7.53745931872191e-06	0.000176528428267302
ENSG00000222041	LINC00152	0.503787272980505	7.61481412427041e-06	0.00017814914714072
ENSG00000100604	CHGA	0.739193400573196	7.63086906793308e-06	0.000178333818185461
ENSG00000149357	LAMTOR1	0.277144021716939	7.6760821998875e-06	0.000179198795031775
ENSG00000135211	TMEM60	0.33555278155775	7.68796760888781e-06	0.000179284717419218
ENSG00000241886	RP11-242C19.2	0.665003827022932	7.73064663484426e-06	0.000180087803430684
ENSG00000188487	INSC	0.793765363994919	7.74568924635667e-06	0.000180246065731778
ENSG00000198804	MT-CO1	-0.478934307669361	7.80485494534409e-06	0.000181429665330547
ENSG00000134248	LAMTOR5	0.297963559571126	7.88404485729326e-06	0.000183075732387582
ENSG00000153107	ANAPC1	-0.335822686051146	7.89387673571387e-06	0.000183109448569091
ENSG00000185499	MUC1	0.622497850170677	7.96886294492735e-06	0.000184652835853242
ENSG00000143570	SLC39A1	0.267753836131203	7.99290808504153e-06	0.000185013807803223
ENSG00000163820	FYCO1	-0.265349531488242	8.07510770963775e-06	0.000186718707474386
ENSG00000083817	ZNF416	-0.337134103824637	8.14756020121313e-06	0.000188194860419353
ENSG00000101596	SMCHD1	0.504392324741367	8.22872041088535e-06	0.000189321040751375
ENSG00000115129	TP53I3	0.454238635910524	8.20739925217265e-06	0.000189321040751375
ENSG00000166707	ZCCHC18	-0.548265433587792	8.23097289432093e-06	0.000189321040751375
ENSG00000197208	SLC22A4	0.557876188554543	8.22210033698033e-06	0.000189321040751375
ENSG00000169045	HNRNPH1	-0.276075752536011	8.30375025797881e-06	0.000190794160764558
ENSG00000114982	KANSL3	-0.210524195533269	8.35832062846143e-06	0.000191846285769444
ENSG00000152804	HHEX	0.355106772573979	8.38642941123776e-06	0.00019228947435987
ENSG00000164091	WDR82	-0.246428970285408	8.43713042266972e-06	0.000193249200068927
ENSG00000122862	SRGN	0.558857190063771	8.50464398808291e-06	0.000194250493927482
ENSG00000213903	LTB4R	0.429738185097381	8.5075155685598e-06	0.000194250493927482
ENSG00000261997	RP11-212I21.4	0.624002250459708	8.50515452911053e-06	0.000194250493927482
ENSG00000170525	PFKFB3	0.611702174357135	8.52184973202958e-06	0.000194374674837764
ENSG00000229054	AC074338.4	0.933286575544217	8.55715546501926e-06	0.000194773337568891
ENSG00000236455	AC005154.5	0.331994312722604	8.55242807244926e-06	0.000194773337568891
ENSG00000234073	AC011816.1	0.709546633643516	8.62854207833625e-06	0.000196193832418028
ENSG00000167851	CD300A	0.428772061108604	8.64718391897611e-06	0.000196413322051504
ENSG00000204525	HLA-C	0.445941763171221	8.65718804555511e-06	0.000196436361353504
ENSG00000145428	RNF175	0.557693720440335	8.80145902668641e-06	0.000199502781319632
ENSG00000124549	BTN2A3P	0.494257891736637	8.87058296349754e-06	0.000200445820408878
ENSG00000138434	SSFA2	0.430297064222519	8.85904061983426e-06	0.000200445820408878
ENSG00000140382	HMG20A	-0.219665635255941	8.86692301084642e-06	0.000200445820408878
ENSG00000228804	RP11-211G3.3	0.616663023554563	9.07503714172072e-06	0.000204853963412954
ENSG00000117020	AKT3	-0.380448031953875	9.0963407401686e-06	0.000205122953058229
ENSG00000151779	NBAS	-0.353813882824307	9.12343696162281e-06	0.000205521877369505
ENSG00000100129	EIF3L	-0.318194413800789	9.1726416105084e-06	0.000206205135628826
ENSG00000103642	LACTB	0.36705498101437	9.16796773620215e-06	0.000206205135628826
ENSG00000168256	NKIRAS2	0.263758451993201	9.22033623198503e-06	0.000207064303191269
ENSG00000163746	PLSCR2	0.92609416440275	9.28047340837487e-06	0.000208200846454209
ENSG00000162894	FAIM3	-0.489087653633166	9.30809510367263e-06	0.000208606344728565
ENSG00000133742	CA1	0.867997292157821	9.42958893108951e-06	0.000211112651366021
ENSG00000259600	RP11-925D8.3	0.785242046588143	9.44898762296857e-06	0.00021133042840275
ENSG00000054523	KIF1B	0.462916396672479	9.51707823898655e-06	0.000212635661145292
ENSG00000257878	RP11-256L6.3	0.542446120097479	9.56934727013565e-06	0.000213585094177461
ENSG00000079277	MKNK1	0.447749574232131	9.58014286323435e-06	0.000213607858882177
ENSG00000254782	RP11-155D18.12	-0.343281935867462	9.61813121753598e-06	0.000214236274448908
ENSG00000101654	RNMT	-0.209219326292413	9.66959718965893e-06	0.000215163307730384
ENSG00000198959	TGM2	0.610581213581556	9.70163624247076e-06	0.000215555080600568
ENSG00000204791	CTD-3065J16.6	0.746728025503674	9.70693328959586e-06	0.000215555080600568
ENSG00000149257	SERPINH1	-0.368191204791051	9.78327866792264e-06	0.00021702987022617
ENSG00000087266	SH3BP2	0.38069653765225	9.89771813805967e-06	0.000219345881373977
ENSG00000109047	RCVRN	0.776112731112131	9.9381434462912e-06	0.000220018614432532
ENSG00000204421	LY6G6C	0.850675998931867	9.96487672704104e-06	0.000220387167371026
ENSG00000042493	CAPG	0.437219424358859	9.99429231200515e-06	0.00022081423792682
ENSG00000261115	TMEM178B	0.888582067662132	1.00192073957774e-05	0.000221141111924376
ENSG00000260660	RP11-69H7.2	0.725675852147389	1.0074914727106e-05	0.000222146278205847
ENSG00000163453	IGFBP7	0.399117530195136	1.01397233855093e-05	0.000223349894855609
ENSG00000152127	MGAT5	-0.308958636989538	1.02303355372305e-05	0.000224666393792989
ENSG00000167513	CDT1	0.683245737429994	1.02251486793822e-05	0.000224666393792989
ENSG00000223387	RP11-408H1.3	0.902593610955106	1.02187579798362e-05	0.000224666393792989
ENSG00000126787	DLGAP5	0.85285802628803	1.03137372710456e-05	0.000226043603921382
ENSG00000146250	PRSS35	-0.908814150517122	1.03113269693558e-05	0.000226043603921382
ENSG00000211821	TRDV2	-0.86730794020237	1.03821661485246e-05	0.000227315343197807
ENSG00000135480	KRT7	0.828853418297521	1.04004253215167e-05	0.000227487180881343
ENSG00000135597	REPS1	-0.229655954828227	1.04604027794276e-05	0.000228570261133273
ENSG00000134571	MYBPC3	0.535370334067724	1.05296988088674e-05	0.000229854594078484
ENSG00000213139	CRYGS	-0.361478052574833	1.0705333335024e-05	0.000233455328047514
ENSG00000146072	TNFRSF21	-0.674956775274816	1.07241587450745e-05	0.000233632694654658
ENSG00000147130	ZMYM3	-0.301477718467375	1.07558926201493e-05	0.000234090647054663
ENSG00000165480	SKA3	0.85032974165346	1.08517965676098e-05	0.000235841652790118
ENSG00000198886	MT-ND4	-0.453838079917072	1.0857933399243e-05	0.000235841652790118
ENSG00000101236	RNF24	0.546626418636471	1.09582757789908e-05	0.000237313462880802
ENSG00000102174	PHEX	-0.715977058978238	1.09470729951202e-05	0.000237313462880802
ENSG00000242661	RP11-113C12.1	0.900260475486181	1.09578006590971e-05	0.000237313462880802
ENSG00000163221	S100A12	0.721672568987274	1.10219117762495e-05	0.00023845524180478
ENSG00000110107	PRPF19	-0.279853436826143	1.10502774982907e-05	0.000238832456592631
ENSG00000181191	PJA1	-0.323467764141087	1.12264172538596e-05	0.000242399647642378
ENSG00000157833	FAM59B	-0.446972703084127	1.12657039812105e-05	0.000242768143681885
ENSG00000248571	RP11-768B22.2	0.584322634494786	1.12560849409184e-05	0.000242768143681885
ENSG00000172007	RAB33B	0.486763846914252	1.14512965988447e-05	0.000246524415745178
ENSG00000237803	LINC00211	0.639894350370999	1.14755999698623e-05	0.00024680446352506
ENSG00000151726	ACSL1	0.619647541123268	1.15023149894393e-05	0.000247135776631502
ENSG00000108312	UBTF	-0.214085562495633	1.15282501958442e-05	0.000247449700421799
ENSG00000249042	CTD-2015H6.3	0.615958452822695	1.16328754899842e-05	0.000249450404643419
ENSG00000064932	SBNO2	0.496294337488625	1.17090428891059e-05	0.000250837545264561
ENSG00000169248	CXCL11	0.910995074055785	1.18083682893695e-05	0.000252717586181207
ENSG00000225572	AC003077.1	0.917559614271324	1.18393721501996e-05	0.000253133190659503
ENSG00000122642	FKBP9	0.568563808087584	1.18618751098862e-05	0.000253366405695136
ENSG00000086848	ALG9	-0.275135076962827	1.190940490668e-05	0.000254133209585804
ENSG00000198455	ZXDB	-0.348378273815738	1.19340691007661e-05	0.000254411067239844
ENSG00000145996	CDKAL1	-0.308922794707555	1.19664819795781e-05	0.000254853409099182
ENSG00000162949	CAPN13	0.861415555313131	1.19970725182935e-05	0.000255256116453001
ENSG00000113360	DROSHA	-0.271692255901212	1.21294599913943e-05	0.000257821819330698
ENSG00000185722	ANKFY1	0.341037110530095	1.22028889966373e-05	0.000259130541754638
ENSG00000242314	RP11-428G5.2	0.786423368980299	1.22425480975592e-05	0.000259720309203656
ENSG00000104904	OAZ1	0.265362327470967	1.22821812387568e-05	0.000260308382393865
ENSG00000164715	LMTK2	0.448112937453985	1.23123832970085e-05	0.000260695627347804
ENSG00000177733	HNRNPA0	-0.237720549602716	1.23400555472818e-05	0.000261028609645358
ENSG00000198824	CHAMP1	-0.337888130607555	1.25372830405802e-05	0.000264944073229901
ENSG00000123405	NFE2	0.501761941058342	1.26183797913278e-05	0.000266400209488216
ENSG00000115806	GORASP2	-0.22198936893365	1.2679694939379e-05	0.000267178412845101
ENSG00000160888	IER2	0.355047511617525	1.26758013148907e-05	0.000267178412845101
ENSG00000223629	DEFA8P	0.854483218133221	1.26990920034128e-05	0.000267329344283789
ENSG00000010810	FYN	-0.250747056340609	1.27252951053375e-05	0.000267623121604168
ENSG00000163171	CDC42EP3	0.400367146632817	1.28910108341627e-05	0.000270847574747394
ENSG00000165959	CLMN	0.410558758053332	1.2951547690748e-05	0.000271858087022607
ENSG00000103313	MEFV	0.520691666703801	1.30192663946733e-05	0.000273017264865649
ENSG00000180739	S1PR5	-0.539980127424847	1.32706597971872e-05	0.000278022231283161
ENSG00000130826	DKC1	-0.210192378427948	1.34543735576324e-05	0.000281601069547725
ENSG00000178814	OPLAH	0.572928365689262	1.35594753460324e-05	0.00028325821776879
ENSG00000261373	RP11-368I7.2	0.458870198628801	1.35574781327089e-05	0.00028325821776879
ENSG00000105767	CADM4	0.509918670355147	1.35804421995355e-05	0.00028342525549384
ENSG00000075218	GTSE1	0.725895879251114	1.36761296658621e-05	0.000284878083249525
ENSG00000259671	RP11-925D8.6	0.769877832095019	1.36732812061199e-05	0.000284878083249525
ENSG00000102606	ARHGEF7	-0.188206171121176	1.37332255035977e-05	0.00028579496236106
ENSG00000233461	RP11-295G20.2	0.583349047819255	1.37932601845536e-05	0.000286771197233759
ENSG00000176871	WSB2	0.320006561029476	1.38089689273596e-05	0.000286824885961726
ENSG00000258398	RP11-218E20.6	0.709638435172587	1.38553438392964e-05	0.000287514832129596
ENSG00000214688	C10orf105	0.467952654328989	1.39596223049972e-05	0.000289403896571626
ENSG00000251562	MALAT1	0.315300320384156	1.40522555390685e-05	0.000291048185577428
ENSG00000141977	CIB3	0.869239533601499	1.40966275596166e-05	0.000291690728035212
ENSG00000070010	UFD1L	0.20717357261375	1.42867678272107e-05	0.0002953454718944
ENSG00000132780	NASP	0.258419391844166	1.43510556454249e-05	0.000296394061349885
ENSG00000118898	PPL	0.647260593384118	1.44452740370853e-05	0.000298058246444147
ENSG00000198721	ECI2	-0.267533004158411	1.4487692646325e-05	0.000298651483032876
ENSG00000244758	AC093627.6	0.596954493335973	1.45361491496573e-05	0.000299367950112311
ENSG00000162545	CAMK2N1	-0.603041106406244	1.45627584120866e-05	0.000299633553731172
ENSG00000232450	RP4-730K3.3	0.656027548915378	1.45993103037887e-05	0.000299922710319223
ENSG00000234518	PTGES3P1	0.351129238211581	1.46042635934123e-05	0.000299922710319223
ENSG00000198818	SFT2D1	0.263546839400137	1.4772415288048e-05	0.00030309112343581
ENSG00000172818	OVOL1	0.87435680318555	1.48103259749435e-05	0.000303583895758434
ENSG00000107864	CPEB3	0.441080088400915	1.48650139945911e-05	0.00030441932595671
ENSG00000134531	EMP1	0.662668669087521	1.49529487072176e-05	0.000305933410300947
ENSG00000107371	EXOSC3	0.228990456252877	1.4968638650438e-05	0.000305967935594687
ENSG00000143452	HORMAD1	0.60075402990761	1.51458048797742e-05	0.000309299983577521
ENSG00000163328	GPR155	0.357788169259152	1.54997226149282e-05	0.000316231969055832
ENSG00000180549	FUT7	0.469042537693906	1.55581224279054e-05	0.000317127363033732
ENSG00000134243	SORT1	0.525258142499221	1.56015995436198e-05	0.000317696997287888
ENSG00000151466	SCLT1	0.407243329833466	1.56151469080222e-05	0.000317696997287888
ENSG00000150681	RGS18	0.572017909069879	1.56402310305707e-05	0.000317911337906046
ENSG00000161249	DMKN	-0.714781366355688	1.56860202941832e-05	0.000318545752275276
ENSG00000257315	ZBED6	0.530923798167065	1.5811378730565e-05	0.000320793348785121
ENSG00000107959	PITRM1	-0.265466241210313	1.5912052482826e-05	0.000322536418183887
ENSG00000226004	RP11-10J5.1	0.854493244999728	1.59384491689624e-05	0.000322772060047263
ENSG00000142599	RERE	0.443870620619194	1.59696352504434e-05	0.000322843154753541
ENSG00000179750	APOBEC3B	0.810784914877697	1.59715093262815e-05	0.000322843154753541
ENSG00000167476	JSRP1	0.275204656341427	1.60692164834212e-05	0.000324517975396707
ENSG00000184371	CSF1	0.516589132965735	1.61973881815667e-05	0.000326502886674737
ENSG00000203804	C1orf138	0.640761625556721	1.61971830324883e-05	0.000326502886674737
ENSG00000092098	RNF31	0.341190275138638	1.63123091291341e-05	0.000327009419064872
ENSG00000134910	STT3A	-0.342195516649118	1.62953575855083e-05	0.000327009419064872
ENSG00000159588	CCDC17	0.461575694667194	1.63085018629973e-05	0.000327009419064872
ENSG00000174749	C4orf32	0.417130962223801	1.6281842676084e-05	0.000327009419064872
ENSG00000175730	BAK1P1	0.377075100610199	1.62589951183319e-05	0.000327009419064872
ENSG00000258102	RP11-809C9.2	0.657685304392638	1.62911129302874e-05	0.000327009419064872
ENSG00000185201	IFITM2	0.548181688374571	1.64839908606977e-05	0.000330148198255825
ENSG00000230185	C9orf147	0.809888442388255	1.65220842583676e-05	0.000330608116419038
ENSG00000155957	TMBIM4	0.309908807179274	1.66840920958473e-05	0.000333239576221535
ENSG00000261218	RP11-960L18.1	0.519098269625731	1.66733862190817e-05	0.000333239576221535
ENSG00000132002	DNAJB1	-0.275700702187592	1.6717790802938e-05	0.000333607714004565
ENSG00000173914	RBM4B	-0.212540453074367	1.67473908139407e-05	0.000333893464119907
ENSG00000257808	RP11-1136G11.8	0.504919266260392	1.68784224289796e-05	0.000336199096167395
ENSG00000163512	AZI2	0.395262289743574	1.71039406467541e-05	0.000340380880757946
ENSG00000139178	C1RL	0.419759304935674	1.72987409639366e-05	0.000343944302823456
ENSG00000008130	NADK	0.471853084404937	1.73337754541085e-05	0.000344327570407022
ENSG00000159433	STARD9	-0.452733434807794	1.74116778850686e-05	0.000344934336778454
ENSG00000230825	AC005532.5	0.885882249715892	1.74002526429764e-05	0.000344934336778454
ENSG00000256928	RP11-809N8.2	0.354603376976159	1.73838332101831e-05	0.000344934336778454
ENSG00000100311	PDGFB	-0.513467762547444	1.74534689378345e-05	0.000345449048696215
ENSG00000139197	PEX5	-0.253037031806209	1.74758213870827e-05	0.000345578437220945
ENSG00000136193	SCRN1	-0.415835188851567	1.75838415017742e-05	0.000347086287854804
ENSG00000171860	C3AR1	0.581166532132686	1.75746283722925e-05	0.000347086287854804
ENSG00000139631	CSAD	0.456152498175906	1.76279189216231e-05	0.00034732881547014
ENSG00000180182	MED14	-0.239146226561237	1.76239163993466e-05	0.00034732881547014
ENSG00000212907	MT-ND4L	-0.465670987989815	1.77451084918138e-05	0.000349322851941102
ENSG00000264769	RP11-498C9.12	0.629328194098845	1.78525115164262e-05	0.000351120818312717
ENSG00000125630	POLR1B	-0.284278363492208	1.78722753129131e-05	0.000351193424336749
ENSG00000106608	URGCP	-0.274965318672655	1.79472350760125e-05	0.000352033243847351
ENSG00000185215	TNFAIP2	0.409231659147719	1.79375041177099e-05	0.000352033243847351
ENSG00000115053	NCL	-0.275383523026195	1.80278716071581e-05	0.000353297778016154
ENSG00000186806	VSIG10L	0.61255658477462	1.80575309801053e-05	0.000353561926027134
ENSG00000116793	PHTF1	0.432261468016195	1.81425219744409e-05	0.000354236107817035
ENSG00000234506	RP11-274B18.2	0.657578594878222	1.81568093339014e-05	0.000354236107817035
ENSG00000253210	RP11-809O17.1	0.554312547426423	1.81227193855459e-05	0.000354236107817035
ENSG00000268310	AC087645.1	0.810172082469678	1.81559646909571e-05	0.000354236107817035
ENSG00000121406	ZNF549	-0.314723938845595	1.82508658451732e-05	0.000355753496505691
ENSG00000067704	IARS2	-0.312129348437498	1.83332499050881e-05	0.000357040858891336
ENSG00000243565	AC009950.1	0.619319985699825	1.83942460975254e-05	0.000357909769792545
ENSG00000185261	KIAA0825	0.561188351129823	1.84276936643161e-05	0.000358241578522217
ENSG00000252678	RPPH1	0.704917238207369	1.84597148200002e-05	0.000358545092028288
ENSG00000224611	AC007919.18	0.878959216747452	1.85795026245578e-05	0.000360551253862534
ENSG00000169026	MFSD7	0.475409117536784	1.86051119600702e-05	0.000360727862856695
ENSG00000151208	DLG5	-0.583345507815724	1.8664054591567e-05	0.00036154987312086
ENSG00000221890	NPTXR	-0.539812436441064	1.88023405778972e-05	0.000363906061973102
ENSG00000214176	PLEKHM1P	0.379086059622272	1.90133321614467e-05	0.000367664000937851
ENSG00000163687	DNASE1L3	-0.712568276971112	1.91539162806449e-05	0.000370055017372565
ENSG00000240178	CA5B-AS1	-0.361260972136005	1.92312525731785e-05	0.000371220936375021
ENSG00000136485	DCAF7	-0.233072071469243	1.93922911594948e-05	0.000373669271716156
ENSG00000166900	STX3	0.482515015009277	1.93780509649822e-05	0.000373669271716156
ENSG00000135775	COG2	-0.24439954621194	1.94749955339556e-05	0.000374932270847986
ENSG00000241627	UBQLN4P1	-0.397402679367622	1.94955697231912e-05	0.000374997970089306
ENSG00000133116	KL	0.711859919504537	1.96469035775113e-05	0.000377576508418821
ENSG00000113648	H2AFY	0.325425241569665	1.9814559545985e-05	0.000380450533847619
ENSG00000163563	MNDA	0.456213424580486	1.98312735367918e-05	0.000380450533847619
ENSG00000174021	GNG5	0.383611098518732	2.00823046778384e-05	0.000384928455715305
ENSG00000020256	ZFP64	-0.339487723205842	2.02982997932326e-05	0.000388727562473204
ENSG00000112715	VEGFA	0.465423590927921	2.03361156058617e-05	0.00038911073739377
ENSG00000158825	CDA	0.537781516238995	2.0622135168951e-05	0.000394238211353236
ENSG00000129682	FGF13	0.810214969115509	2.06873184797584e-05	0.000395138632955596
ENSG00000019991	HGF	0.465844005940517	2.07965862455626e-05	0.00039687878257798
ENSG00000004487	KDM1A	-0.27753724611743	2.08170998692774e-05	0.000396923603179389
ENSG00000258382	CTD-2313J17.2	0.746360765926061	2.08568908557766e-05	0.000397335590313492
ENSG00000102837	OLFM4	0.883841989939427	2.08838251741277e-05	0.000397502146236816
ENSG00000110514	MADD	-0.225202629479246	2.09480432594927e-05	0.000398377452796496
ENSG00000089597	GANAB	-0.302530052921073	2.11571018666053e-05	0.000402003332945385
ENSG00000204516	MICB	0.348042339824676	2.11782659480403e-05	0.000402055855109147
ENSG00000265365	KIAA0040	0.389548292893816	2.13399586411982e-05	0.000404773816205575
ENSG00000214595	EML6	-0.647455625816247	2.13682871266379e-05	0.000404959620125034
ENSG00000178307	TMEM11	0.247004285667406	2.14020600215689e-05	0.000405248191968199
ENSG00000247473	CARS-AS1	0.560310605873894	2.14822166813063e-05	0.000406413780695433
ENSG00000080503	SMARCA2	-0.304777705007176	2.1594641999464e-05	0.000408187303053882
ENSG00000226958	RNA28S5	0.44421691004893	2.16552441368317e-05	0.000408979031662843
ENSG00000160803	UBQLN4	-0.259322401347267	2.17637664409942e-05	0.000410673627376653
ENSG00000235750	KIAA0040	0.388749481455883	2.18180001780896e-05	0.000411035170345492
ENSG00000259182	RP11-424I19.2	0.752843535409795	2.18205481488614e-05	0.000411035170345492
ENSG00000134759	ELP2	-0.262983232049881	2.18450760119162e-05	0.000411142769971042
ENSG00000243646	IL10RB	0.345806478596179	2.1896785988847e-05	0.000411455343589389
ENSG00000255275	RP13-279N23.2	-0.333034644029054	2.18993439473919e-05	0.000411455343589389
ENSG00000254211	CTB-43E15.4	0.817707010217409	2.20049555306073e-05	0.000413084435824142
ENSG00000124490	CRISP2	0.886184088030108	2.20937254029255e-05	0.000414394844445773
ENSG00000124942	AHNAK	-0.419394320741977	2.21381308629355e-05	0.000414871610193827
ENSG00000109805	NCAPG	0.609604296267983	2.22365173799244e-05	0.000416358304429072
ENSG00000266913	CTC-548K16.2	0.666931568651224	2.23494618978022e-05	0.000418114804733626
ENSG00000143543	JTB	0.208093004954883	2.26190104526147e-05	0.000421713308361847
ENSG00000153029	MR1	0.275726755161389	2.25728065946397e-05	0.000421713308361847
ENSG00000159496	RGL4	0.341043201129141	2.26079386917037e-05	0.000421713308361847
ENSG00000165264	NDUFB6	0.323572723674561	2.25895969064026e-05	0.000421713308361847
ENSG00000163959	SLC51A	0.438700974701641	2.26937379755514e-05	0.000422745838451641
ENSG00000145491	ROPN1L	0.562155125486243	2.27183373996086e-05	0.000422843603508388
ENSG00000103091	WDR59	-0.206231345803653	2.29080096224732e-05	0.000426010994264394
ENSG00000254554	RP11-351I24.1	0.768037657097383	2.29755823475858e-05	0.000426904294113177
ENSG00000183762	KREMEN1	0.647698515990763	2.30104945104044e-05	0.000427189732835044
ENSG00000170956	CEACAM3	0.492048205850806	2.3066550670131e-05	0.000427866891929569
ENSG00000166619	BLCAP	-0.13647496795314	2.32182176340586e-05	0.000430314905446831
ENSG00000131153	GINS2	0.669140041853952	2.32962899338872e-05	0.000431395958767262
ENSG00000183337	BCOR	-0.3292910909325	2.33180135601947e-05	0.000431432611603568
ENSG00000112304	ACOT13	0.215138671936634	2.338147644447e-05	0.000431875436845404
ENSG00000152439	ZNF773	-0.307293135247914	2.33638987268793e-05	0.000431875436845404
ENSG00000213277	RP11-332O19.3	0.613283534688492	2.34239923366577e-05	0.000432295318030665
ENSG00000079263	SP140	0.462700303909679	2.34546736752681e-05	0.000432496265382517
ENSG00000125485	DDX31	-0.328675788604723	2.35569919714992e-05	0.000434016721390581
ENSG00000097033	SH3GLB1	0.395508010117616	2.3653662204684e-05	0.000435430642657582
ENSG00000179152	TCAIM	0.331423592171885	2.37403102625652e-05	0.000436657844736794
ENSG00000167065	DUSP18	0.426779208998572	2.38302977422509e-05	0.000437944353209356
ENSG00000267293	RP11-8H2.1	0.68705578293262	2.39387580754588e-05	0.000439567901434328
ENSG00000136560	TANK	0.381224324270031	2.3981174487938e-05	0.000439977030844612
ENSG00000006453	BAIAP2L1	0.477610691348643	2.40424568013363e-05	0.000440731311716443
ENSG00000259268	AC007950.1	0.850253844098174	2.42484920686637e-05	0.000444135624637359
ENSG00000251215	GOLGA5P1	0.608016395885842	2.44107298099321e-05	0.00044673271111962
ENSG00000162892	IL24	-0.435050823242296	2.45445334178388e-05	0.000448430267318726
ENSG00000214696	AC007347.1	-0.36035753846868	2.45338641063507e-05	0.000448430267318726
ENSG00000103005	USB1	0.396113825744841	2.46769718981513e-05	0.000450473277315374
ENSG00000102007	PLP2	0.345097437400453	2.48482518627011e-05	0.000453221328423941
ENSG00000162873	KLHDC8A	0.754806972840456	2.49955985014954e-05	0.000455528626235343
ENSG00000054967	RELT	0.361699578330474	2.51648008675469e-05	0.000458230053130639
ENSG00000230191	RP4-725G10.3	0.873892671412776	2.52705847559167e-05	0.000459773145296866
ENSG00000204577	LILRB3	0.502333354529266	2.53801920603812e-05	0.000461383175300656
ENSG00000135476	ESPL1	0.660213547749973	2.54595392273098e-05	0.000461673354071326
ENSG00000189190	ZNF600	-0.444563912210942	2.54520200131056e-05	0.000461673354071326
ENSG00000265666	CTD-2267D19.2	0.509333284959089	2.54385133417075e-05	0.000461673354071326
ENSG00000102226	USP11	-0.342429400952809	2.55046746603269e-05	0.000462108330018908
ENSG00000249119	MTND6P4	-0.594049564474515	2.55449522830855e-05	0.000462454641539106
ENSG00000159658	KIAA0494	-0.214993249910389	2.56221405661575e-05	0.000463468040986017
ENSG00000090376	IRAK3	0.560365834047425	2.5749333015249e-05	0.000465383520029947
ENSG00000173559	NABP1	0.461886618548842	2.59838077093781e-05	0.000469233208477372
ENSG00000118508	RAB32	0.370893220027341	2.60737791050075e-05	0.000470381995283857
ENSG00000134899	ERCC5	-0.201863459456065	2.60904754145822e-05	0.000470381995283857
ENSG00000089154	GCN1L1	-0.236861377387403	2.64095917447163e-05	0.000475642512957246
ENSG00000147894	C9orf72	0.484023075092	2.6425793360949e-05	0.000475642512957246
ENSG00000136875	PRPF4	-0.20861741723627	2.65350426247184e-05	0.000477215815961088
ENSG00000184611	KCNH7	0.625261854918612	2.66823252186474e-05	0.000479469973974231
ENSG00000101363	MANBAL	0.231082375904536	2.68747333319772e-05	0.000482224598002655
ENSG00000215244	AL137145.1	0.609258181995825	2.68886900430095e-05	0.000482224598002655
ENSG00000262001	DLGAP1-AS2	0.454354714301443	2.69018253153282e-05	0.000482224598002655
ENSG00000153187	HNRNPU	-0.245874597016648	2.69665266943779e-05	0.000482988176064632
ENSG00000179899	PHC1P1	-0.387893370400443	2.71764075231877e-05	0.000486348632914967
ENSG00000063978	RNF4	-0.218431510047051	2.72212394044443e-05	0.000486752293147718
ENSG00000133226	SRRM1	-0.215535644471048	2.73203094983819e-05	0.000488124352288752
ENSG00000011201	KAL1	0.869828280262529	2.7447291524707e-05	0.000489592462943978
ENSG00000059804	SLC2A3	0.487160933399587	2.74312863434521e-05	0.000489592462943978
ENSG00000260350	RP11-152P23.2	0.4901020587286	2.75854830461004e-05	0.000491656109331435
ENSG00000172775	FAM192A	0.20191534490184	2.79001897553677e-05	0.000496859858471508
ENSG00000038210	PI4K2B	0.411110951604242	2.79668822997729e-05	0.000497641974863468
ENSG00000177479	ARIH2	-0.134553995625498	2.8150500259791e-05	0.000500501693390312
ENSG00000162399	BSND	0.873549786042437	2.8391131373797e-05	0.000504369602966536
ENSG00000163508	EOMES	-0.508887857580601	2.84192483585337e-05	0.00050445897309693
ENSG00000005302	MSL3	0.318608065115887	2.85883072220301e-05	0.000506847707688408
ENSG00000206561	COLQ	-0.477038195061287	2.86234072256417e-05	0.000506847707688408
ENSG00000267598	CTC-250I14.6	0.358647330764508	2.86080337529961e-05	0.000506847707688408
ENSG00000246082	NUDT16P	0.491697956148563	2.89448515957507e-05	0.000512124657667004
ENSG00000099377	HSD3B7	0.513257954417194	2.90006078546569e-05	0.000512367455228189
ENSG00000125347	IRF1	0.402723687870684	2.90289190230423e-05	0.000512367455228189
ENSG00000184083	FAM120C	-0.280072642481909	2.90064221386609e-05	0.000512367455228189
ENSG00000087086	FTL	0.342699624696315	2.90943801921892e-05	0.00051310839514086
ENSG00000268950	AC114494.1	0.827147011247042	2.92171465675196e-05	0.000514857959392637
ENSG00000107566	ERLIN1	0.517104945340941	2.94185759630478e-05	0.000517882132795411
ENSG00000239839	DEFA3	0.866625073833283	2.94361635134273e-05	0.000517882132795411
ENSG00000146670	CDCA5	0.719509800644846	2.95133816650057e-05	0.00051882293062111
ENSG00000011426	ANLN	0.789248194105945	2.95415060689861e-05	0.000518899878708534
ENSG00000168615	ADAM9	0.421832503613731	2.96181158819806e-05	0.000519827670792898
ENSG00000128309	MPST	0.327956725580223	2.98192474626972e-05	0.00052293770169133
ENSG00000185862	EVI2B	0.388032380326942	2.99857807140386e-05	0.000525436483065323
ENSG00000111911	HINT3	0.287126807505569	3.02877175023793e-05	0.000529877434062842
ENSG00000181666	HKR1	-0.26632419955886	3.02671001768822e-05	0.000529877434062842
ENSG00000162069	CCDC64B	0.760586572550539	3.05307772537928e-05	0.000533702411018101
ENSG00000096063	SRPK1	0.470190139286688	3.06496025527055e-05	0.000535351291270318
ENSG00000115607	IL18RAP	0.626492150514424	3.07713338932188e-05	0.000537048256310482
ENSG00000100865	CINP	0.195826033540694	3.09664795938544e-05	0.000539162187733316
ENSG00000130635	COL5A1	-0.803367996066336	3.09648651331015e-05	0.000539162187733316
ENSG00000134330	IAH1	0.225659719793685	3.09189374958401e-05	0.000539162187733316
ENSG00000110492	MDK	0.59850453884371	3.10135781864393e-05	0.000539552306490355
ENSG00000163412	EIF4E3	0.377000359206509	3.11234729551444e-05	0.000541033418888512
ENSG00000135473	PAN2	-0.273306967073334	3.13677049096153e-05	0.000544735703706099
ENSG00000163235	TGFA	0.538537786290103	3.13863095952578e-05	0.000544735703706099
ENSG00000084652	TXLNA	-0.16607143065809	3.16055351917302e-05	0.000548083713406564
ENSG00000166313	APBB1	-0.385640614995413	3.16330150731779e-05	0.000548083713406564
ENSG00000173088	C10orf131	0.481773379981301	3.16544618698953e-05	0.000548083713406564
ENSG00000151657	KIN	0.284398309122113	3.16817133619483e-05	0.000548121234102876
ENSG00000065150	IPO5	-0.266215940977756	3.17323671642835e-05	0.000548563255464208
ENSG00000103657	HERC1	-0.237808551933222	3.1775180503768e-05	0.000548869145603031
ENSG00000122224	LY9	-0.325177315317133	3.18131463447428e-05	0.00054909088529145
ENSG00000047849	MAP4	-0.304540847105902	3.1990594126441e-05	0.000551717815514492
ENSG00000163635	ATXN7	0.380754472593356	3.20698329311781e-05	0.000552010396879294
ENSG00000164167	LSM6	0.276430495452597	3.20833464846782e-05	0.000552010396879294
ENSG00000179840	C1orf200	0.417592829169356	3.20339486329239e-05	0.000552010396879294
ENSG00000105732	ZNF574	-0.265490085449935	3.21992533149178e-05	0.00055356875230863
ENSG00000196778	OR52K1	0.779242865797784	3.22419933119353e-05	0.000553867764040171
ENSG00000060971	ACAA1	0.280733188994951	3.25394940062469e-05	0.000558100850494898
ENSG00000096384	HSP90AB1	-0.311252924628688	3.25219507486489e-05	0.000558100850494898
ENSG00000112992	NNT	-0.30236807747748	3.26291444340871e-05	0.000559199556885677
ENSG00000124571	XPO5	-0.23172031501162	3.26657670783609e-05	0.000559301948400242
ENSG00000186188	O3FAR1	0.735049556665406	3.2686311295003e-05	0.000559301948400242
ENSG00000175197	DDIT3	0.391681904995255	3.27391937283149e-05	0.000559330822640664
ENSG00000180891	CUEDC1	0.472107597065639	3.27253088146625e-05	0.000559330822640664
ENSG00000253719	ATXN7L3B	-0.19238004446245	3.28119059849792e-05	0.000560135123185767
ENSG00000048028	USP28	-0.351110857744972	3.31901601926995e-05	0.000565725637155874
ENSG00000168461	RAB31	0.438726573997002	3.32170606595115e-05	0.000565725637155874
ENSG00000171786	NHLH1	0.51291671045351	3.321660503226e-05	0.000565725637155874
ENSG00000168288	MMADHC	0.30363191567294	3.32917875305317e-05	0.0005661158360542
ENSG00000188042	ARL4C	-0.295668741051522	3.3284718066663e-05	0.0005661158360542
ENSG00000158089	GALNT14	0.635340652948477	3.34803054484655e-05	0.000568878813650404
ENSG00000115884	SDC1	0.865849800135341	3.38697084591619e-05	0.000575048173691644
ENSG00000128604	IRF5	0.376963297367176	3.39845206475091e-05	0.000575214162775808
ENSG00000220517	ASS1P1	0.62290303413353	3.39514560305793e-05	0.000575214162775808
ENSG00000226239	RP1-310O13.7	0.719107976911708	3.3964358571515e-05	0.000575214162775808
ENSG00000235027	AC068580.6	0.436380237259535	3.39847825794503e-05	0.000575214162775808
ENSG00000158201	ABHD3	0.40713040039231	3.40249365605555e-05	0.00057522610098303
ENSG00000235169	SMIM1	0.759846753985052	3.40381377772669e-05	0.00057522610098303
ENSG00000150938	CRIM1	-0.442255966494943	3.41199524982086e-05	0.000575718210068229
ENSG00000248971	KRT8P46	0.565525173992542	3.41134891334953e-05	0.000575718210068229
ENSG00000067840	PDZD4	-0.494964865306319	3.41942858945075e-05	0.000576527269352533
ENSG00000160685	ZBTB7B	0.344424956504545	3.42458933822023e-05	0.000576952209941791
ENSG00000114423	CBLB	-0.325594813589569	3.44219146707351e-05	0.000579470922550256
ENSG00000112077	RHAG	0.856956717864331	3.45453920600633e-05	0.000581101895230519
ENSG00000197353	LYPD2	-0.790789002466173	3.4669734664092e-05	0.000582744901650058
ENSG00000150712	MTMR12	-0.267718888495916	3.50564104761437e-05	0.000588791410695015
ENSG00000156127	BATF	0.386652374497892	3.51625302097523e-05	0.000590120159457218
ENSG00000100596	SPTLC2	0.402617795654762	3.52176448060059e-05	0.000590138617067512
ENSG00000160695	VPS11	-0.253567725985828	3.51947747027309e-05	0.000590138617067512
ENSG00000137806	NDUFAF1	0.263985859455843	3.53004230244562e-05	0.000591072447132101
ENSG00000100271	TTLL1	-0.330491284986247	3.53351572502371e-05	0.00059109342412312
ENSG00000101452	DHX35	-0.224244415908397	3.53557780114831e-05	0.00059109342412312
ENSG00000204866	IGFL2	0.851942243053893	3.54612336338185e-05	0.000592259051713083
ENSG00000242500	RP11-24O6.2	0.36107799211784	3.54797079626757e-05	0.000592259051713083
ENSG00000178104	PDE4DIP	-0.281986419046268	3.55075175089569e-05	0.00059227081304444
ENSG00000116641	DOCK7	-0.444659635982669	3.556296024665e-05	0.000592743130701411
ENSG00000229598	PRDX3P1	0.567359324748206	3.61300362486093e-05	0.000601735839991129
ENSG00000240979	RP11-79D8.2	0.423062056160794	3.68176223495764e-05	0.000612720385346988
ENSG00000136628	EPRS	-0.276652299180975	3.7013407658272e-05	0.0006155098711879
ENSG00000159189	C1QC	0.784698200914762	3.73409346147036e-05	0.000620072003392397
ENSG00000179165	PXT1	0.852109162593031	3.73445039798816e-05	0.000620072003392397
ENSG00000010539	ZNF200	0.339006161962391	3.74507189540173e-05	0.00062136344712546
ENSG00000255453	AP000640.8	0.549391474883681	3.75410175226508e-05	0.000622389054542825
ENSG00000025039	RRAGD	0.426189742819205	3.78030959143357e-05	0.000625310710692013
ENSG00000086730	LAT2	0.379182351560039	3.77513920447548e-05	0.000625310710692013
ENSG00000132386	SERPINF1	-0.4041931106542	3.77832861327195e-05	0.000625310710692013
ENSG00000128011	LRFN1	0.484275978194695	3.78762353951723e-05	0.000626046610907647
ENSG00000089685	BIRC5	0.763222723618924	3.79470950136796e-05	0.00062627037246519
ENSG00000151952	TMEM132D	0.656508723408594	3.79468871866201e-05	0.00062627037246519
ENSG00000081377	CDC14B	-0.34643429448889	3.81461580210449e-05	0.000629080527485171
ENSG00000124177	CHD6	-0.284406984691642	3.81827967539384e-05	0.000629209873205361
ENSG00000035499	DEPDC1B	0.778618265833751	3.83100818178651e-05	0.000630624471852336
ENSG00000078699	CBFA2T2	-0.216733003554483	3.83263602864813e-05	0.000630624471852336
ENSG00000060491	OGFR	0.367774265994423	3.83628027907384e-05	0.000630749137532298
ENSG00000123360	PDE1B	0.402332096814905	3.86318731519461e-05	0.000634695534017425
ENSG00000224083	RP11-39K24.4	0.687926858798389	3.89581788376938e-05	0.000639575631692297
ENSG00000117597	DIEXF	-0.309974927016026	3.94692629287876e-05	0.000647479627820524
ENSG00000174197	MGA	-0.257519146791472	3.95676846576599e-05	0.000648607259905871
ENSG00000107281	NPDC1	0.554750304354178	4.06649422854455e-05	0.000666094193312795
ENSG00000197102	DYNC1H1	-0.229739565828542	4.08902109756436e-05	0.00066928239702531
ENSG00000168884	TNIP2	0.192311789352462	4.09890332231532e-05	0.000670397728262815
ENSG00000167721	TSR1	-0.217822260598358	4.1119226613943e-05	0.000672024099282924
ENSG00000124508	BTN2A2	0.307965709789294	4.15928236798769e-05	0.000679256195985792
ENSG00000109016	DHRS7B	0.292577474846744	4.18068672408899e-05	0.000682169183176869
ENSG00000261903	RP1-59D14.6	0.437309146622424	4.18336325777769e-05	0.000682169183176869
ENSG00000269564	AC008753.4	0.659796787198188	4.19488665348606e-05	0.000683538167526652
ENSG00000152760	TCTEX1D1	0.854386765304088	4.20935089778651e-05	0.000685163531776075
ENSG00000229515	RP11-793E15.1	0.706865227329478	4.21113277733407e-05	0.000685163531776075
ENSG00000261884	CTC-479C5.12	0.298088367064444	4.23215065889554e-05	0.000688070863448858
ENSG00000264895	RP11-421E14.2	0.633806592160743	4.24535123267687e-05	0.000689703864574144
ENSG00000027697	IFNGR1	0.422194430109252	4.2603115857431e-05	0.000691620122288801
ENSG00000243544	Metazoa_SRP	0.553864286929424	4.26746443442537e-05	0.000692267003389969
ENSG00000188938	FAM120AOS	0.197180068679158	4.28149336582677e-05	0.000694027533654901
ENSG00000198932	GPRASP1	-0.466468711510903	4.28864448472234e-05	0.00069467139092415
ENSG00000149658	YTHDF1	-0.146956908226952	4.29437528201181e-05	0.000695084402127705
ENSG00000196550	FAM72A	0.693002619369046	4.31695778578724e-05	0.000698222387692354
ENSG00000146674	IGFBP3	-0.552670299941481	4.32442277728368e-05	0.000698912441615575
ENSG00000110448	CD5	-0.36092687617242	4.35828966451989e-05	0.000703865391422203
ENSG00000163026	C2orf44	-0.302398459978134	4.37293487382638e-05	0.000705188191350408
ENSG00000226091	RP11-90D4.2	0.598980779374408	4.37285488528237e-05	0.000705188191350408
ENSG00000140543	DET1	-0.263445452495061	4.40347997463123e-05	0.000709590272313179
ENSG00000133131	MORC4	-0.407675013745265	4.42241459492299e-05	0.00071211629560547
ENSG00000162073	PAQR4	0.40499789298654	4.44158461306282e-05	0.000714676475552545
ENSG00000156304	SCAF4	-0.235020535748481	4.46437949967228e-05	0.000717815720730972
ENSG00000141526	SLC16A3	0.457531676551401	4.4744386662231e-05	0.000718904112467948
ENSG00000075413	MARK3	0.216301949161825	4.48749836353772e-05	0.000719503939000354
ENSG00000155313	USP25	0.330104405954553	4.49168793772858e-05	0.000719503939000354
ENSG00000164236	ANKRD33B	0.714178774910899	4.49372632061181e-05	0.000719503939000354
ENSG00000249459	ZNF286B	-0.539513861778745	4.48792668369466e-05	0.000719503939000354
ENSG00000255398	HCAR3	0.49584094254666	4.4946358369662e-05	0.000719503939000354
ENSG00000156475	PPP2R2B	-0.512966230176692	4.50328006992909e-05	0.000720359976632654
ENSG00000180539	C9orf139	0.414691591619693	4.514242612647e-05	0.000721585335252008
ENSG00000012048	BRCA1	0.397368249007534	4.51929908065232e-05	0.000721865527860627
ENSG00000224512	AC021593.1	-0.363140956996643	4.54179676687794e-05	0.000724929153784147
ENSG00000211784	TRAV10	-0.645549266017495	4.55981092526863e-05	0.000727273200934634
ENSG00000186918	ZNF395	-0.343196141421416	4.57502334781179e-05	0.00072916728791419
ENSG00000119862	LGALSL	0.539557945200433	4.58986563426296e-05	0.000730999664535567
ENSG00000205423	CNEP1R1	0.366397421728885	4.61935516840629e-05	0.000734754918273376
ENSG00000211695	TRGV9	-0.629661788221487	4.62016959273085e-05	0.000734754918273376
ENSG00000103522	IL21R	-0.331375516232633	4.64174644603603e-05	0.000737113383665213
ENSG00000198793	MTOR	-0.18527439451889	4.63884947196828e-05	0.000737113383665213
ENSG00000120899	PTK2B	0.313777731971626	4.64643454388756e-05	0.000737322013206152
ENSG00000110237	ARHGEF17	0.706542773219176	4.68151597214286e-05	0.000742349822259025
ENSG00000140931	CMTM3	0.271576809750631	4.69008443000859e-05	0.000742821593999698
ENSG00000244480	AC005154.7	0.30977463770281	4.69129009985622e-05	0.000742821593999698
ENSG00000250610	RP11-738E22.2	0.345391033866749	4.74031660323868e-05	0.000750040971016425
ENSG00000106245	BUD31	0.210579114894768	4.76312255270255e-05	0.000753104130963122
ENSG00000089177	KIF16B	-0.433824690907909	4.78368259536684e-05	0.00075580801439885
ENSG00000245719	RP11-34F13.2	0.826878369827324	4.78858282713415e-05	0.000756035573379395
ENSG00000221955	SLC12A8	0.667813197154419	4.85334376842326e-05	0.000765706965226113
ENSG00000111249	CUX2	-0.636525614062609	4.89490996513339e-05	0.000771707630938887
ENSG00000140044	JDP2	0.466050589028992	4.92496421025462e-05	0.000775886034306228
ENSG00000250507	AC008984.6	-0.845495783278228	4.96133392912429e-05	0.000781052649029502
ENSG00000262355	SAMD4A	0.710684026642769	4.97618174980733e-05	0.000782826115299064
ENSG00000186153	WWOX	-0.348167523095473	4.99893939967499e-05	0.000785840466347469
ENSG00000083828	ZNF586	0.238605455739459	5.02012316720549e-05	0.000787057279582396
ENSG00000126368	NR1D1	-0.398207874576911	5.01632905705902e-05	0.000787057279582396
ENSG00000135205	CCDC146	0.419565793670316	5.0193904292703e-05	0.000787057279582396
ENSG00000196352	CD55	0.49335746113486	5.02108758289259e-05	0.000787057279582396
ENSG00000259717	LINC00677	0.606670182083254	5.03214110497836e-05	0.000788224482328904
ENSG00000198785	GRIN3A	0.56382355667295	5.10522101418167e-05	0.000799098741983407
ENSG00000188906	LRRK2	0.50490148202654	5.12233875424994e-05	0.000801204181239194
ENSG00000164663	USP49	0.337270633204723	5.13519005337541e-05	0.000802639755767568
ENSG00000228340	RP5-1043L13.1	0.540130283521761	5.16379131099263e-05	0.000806533266165118
ENSG00000107951	MTPAP	-0.224021426080743	5.17821619134982e-05	0.000807664243411568
ENSG00000166938	DIS3L	-0.241603243590162	5.17842480902296e-05	0.000807664243411568
ENSG00000197157	SND1	-0.309128134615231	5.18228147729667e-05	0.000807689247934447
ENSG00000226085	UQCRFS1P1	0.407589114165876	5.18646697481189e-05	0.000807765430268102
ENSG00000246263	KB-431C1.4	0.482486472114937	5.19026511508619e-05	0.000807781218160601
ENSG00000226738	CTA-384D8.31	0.813767929066619	5.21897446851479e-05	0.000811671253462752
ENSG00000116711	PLA2G4A	0.496030397961377	5.22648731154799e-05	0.000812261552237804
ENSG00000178105	DDX10	-0.305356470579622	5.23359391808168e-05	0.000812787922558656
ENSG00000141956	PRDM15	-0.279291018951458	5.23791287854264e-05	0.000812880925490308
ENSG00000151553	FAM160B1	0.439245082463434	5.24796217386132e-05	0.000813285258588963
ENSG00000255526	NEDD8-MDP1	0.214237377080307	5.24701128424125e-05	0.000813285258588963
ENSG00000197121	PGAP1	0.551285907216644	5.25285756175952e-05	0.000813466977902249
ENSG00000048471	SNX29	-0.346162399836435	5.28060813207504e-05	0.000817185327860989
ENSG00000169902	TPST1	0.738927401287487	5.28819026442316e-05	0.000817779514988751
ENSG00000145833	DDX46	-0.210119613085397	5.29860406994321e-05	0.000818810449309258
ENSG00000117614	SYF2	0.223066043415503	5.31182417978457e-05	0.000820273287296627
ENSG00000164024	METAP1	-0.246021670094773	5.32589951374632e-05	0.000821866033014625
ENSG00000248166	AC008984.2	0.487610318488342	5.34033782844914e-05	0.000823512504512648
ENSG00000217083	RP1-245M18.2	0.699743483205302	5.35631802590124e-05	0.000825394253765641
ENSG00000011600	TYROBP	0.394196125308016	5.36909008692314e-05	0.000826779333963055
ENSG00000170801	HTRA3	0.8405179836367	5.39816632350204e-05	0.000830671354470726
ENSG00000166801	FAM111A	0.273566600853235	5.41796222518631e-05	0.000833130841537974
ENSG00000257433	RP1-197B17.3	0.598642581255793	5.43144399393348e-05	0.000834616615410974
ENSG00000165233	C9orf89	0.300037214873464	5.47395790379076e-05	0.00084055835668118
ENSG00000266970	RP11-806H10.4	0.795790269362884	5.50452662223643e-05	0.000844658786674777
ENSG00000176340	COX8A	0.253973196062551	5.51813075545148e-05	0.000846152106227161
ENSG00000121417	ZNF211	-0.218337852439189	5.55118780699669e-05	0.000850624156877172
ENSG00000234431	AC007283.5	0.457091031337853	5.5616830741315e-05	0.000851635156642238
ENSG00000225447	RPS15AP10	0.781461568385079	5.56968788976726e-05	0.000852263656017538
ENSG00000103175	WFDC1	0.805552425603454	5.60870855914758e-05	0.000857633944898067
ENSG00000185339	TCN2	0.600528664232403	5.61798761674423e-05	0.000858452079814533
ENSG00000125124	BBS2	-0.284215367644956	5.64611735316489e-05	0.000861545462877136
ENSG00000125900	SIRPD	0.439504596289889	5.64505841121501e-05	0.000861545462877136
ENSG00000134716	CYP2J2	0.70767308469374	5.6599647837202e-05	0.000861856786448046
ENSG00000140284	SLC27A2	0.655287435720131	5.65999033706899e-05	0.000861856786448046
ENSG00000259321	RP11-468E2.5	0.441055196625757	5.6528964012362e-05	0.000861856786448046
ENSG00000171603	CLSTN1	-0.263356983964439	5.67650324149201e-05	0.000863769305918119
ENSG00000141560	FN3KRP	-0.279575099576213	5.69039484765107e-05	0.000865280569352982
ENSG00000085788	DDHD2	-0.297273271064591	5.70669480450776e-05	0.000867155689661329
ENSG00000226772	CTA-747E2.10	0.838694646094542	5.71863082017608e-05	0.000868365545876773
ENSG00000214279	RP11-108K14.4	-0.579074439303089	5.73620306167727e-05	0.000870428979866041
ENSG00000267990	CTD-3187F8.15	0.573415746384086	5.74625716527031e-05	0.000871349516435264
ENSG00000166167	BTRC	-0.244089107433953	5.7630016351033e-05	0.000873282584803344
ENSG00000144535	DIS3L2	-0.209136946389853	5.80707815950699e-05	0.000879351800855074
ENSG00000100897	DCAF11	0.219030144843832	5.81533110242664e-05	0.000879991689190612
ENSG00000080546	SESN1	-0.423380669031408	5.88382720066074e-05	0.000889740540910989
ENSG00000049245	VAMP3	0.314432789808571	5.92813591901551e-05	0.000894399229347823
ENSG00000103534	TMC5	0.619514801481527	5.93100765788749e-05	0.000894399229347823
ENSG00000126251	GPR42	0.838644122405329	5.9193938880277e-05	0.000894399229347823
ENSG00000223549	MTND5P28	0.687496068116531	5.9247502933684e-05	0.000894399229347823
ENSG00000258989	RP11-47I22.4	-0.330083466461458	5.96800390563649e-05	0.000899357609255607
ENSG00000127951	FGL2	0.420545575936248	5.99107702476966e-05	0.00090221243327527
ENSG00000170396	ZNF804A	0.48881711303954	6.01264802636311e-05	0.000904381500128492
ENSG00000215298	FP15737	0.508029242827515	6.01789712684467e-05	0.000904381500128492
ENSG00000255833	TIFAB	-0.548371815466268	6.01488735577415e-05	0.000904381500128492
ENSG00000107581	EIF3A	-0.249363961645932	6.05255782043655e-05	0.000908965229789409
ENSG00000181963	OR52K2	0.802961248398606	6.08347700995766e-05	0.000912981154839182
ENSG00000110931	CAMKK2	0.390891271395403	6.09781405822071e-05	0.00091450470134647
ENSG00000106351	AGFG2	-0.290073952177585	6.1109628126878e-05	0.000914788322463529
ENSG00000111729	CLEC4A	0.409675971564034	6.11226465972611e-05	0.000914788322463529
ENSG00000152642	GPD1L	-0.299621158015859	6.10533361169075e-05	0.000914788322463529
ENSG00000109684	CLNK	-0.804112479827673	6.13483358019356e-05	0.000917537635597601
ENSG00000196159	FAT4	-0.783832113123382	6.14757925921859e-05	0.000918815009529311
ENSG00000254719	RP11-351I24.3	0.580356456601683	6.15526418525796e-05	0.000919334775885657
ENSG00000069399	BCL3	0.464235857803791	6.17428824608085e-05	0.000921546260007601
ENSG00000079215	SLC1A3	0.659366298651954	6.20211466505832e-05	0.000925067628301633
ENSG00000070814	TCOF1	-0.272014924967483	6.22040243218338e-05	0.000927162438919776
ENSG00000251380	C5orf20	-0.551294908457661	6.23002165194071e-05	0.00092796321142847
ENSG00000131873	CHSY1	0.47509924404798	6.26408304944735e-05	0.000932401081154455
ENSG00000198899	MT-ATP6	-0.402660602930958	6.2692372758855e-05	0.000932533040948769
ENSG00000244361	RP11-1C1.1	0.760299172151651	6.31179954511303e-05	0.000938225386804523
ENSG00000235081	AC010492.2	0.739094996108308	6.31755542801627e-05	0.000938442580948901
ENSG00000142409	ZNF787	0.332673805360856	6.37004522537755e-05	0.000943703007578962
ENSG00000182379	NXPH4	-0.753844591714609	6.36992223973104e-05	0.000943703007578962
ENSG00000245680	ZNF585B	-0.282869728603165	6.37024363268944e-05	0.000943703007578962
ENSG00000254928	RP11-702H23.6	0.381893498136401	6.36487799088596e-05	0.000943703007578962
ENSG00000119655	NPC2	0.339712475073164	6.38207964689565e-05	0.000944815869676943
ENSG00000176868	AL358781.1	-0.268905563360869	6.42402742132382e-05	0.000950382012074115
ENSG00000109436	TBC1D9	-0.414068584348153	6.44032249955066e-05	0.000952148084828698
ENSG00000224614	AC124944.2	0.426514031072629	6.44899580376348e-05	0.000952785715402541
ENSG00000112685	EXOC2	-0.264445825641861	6.46635108216473e-05	0.000954704307407983
ENSG00000197296	FITM2	-0.274855974291162	6.49943033146339e-05	0.000958940257750213
ENSG00000198727	MT-CYB	-0.44589031111085	6.52973251544723e-05	0.000962111835435182
ENSG00000254635	WAC-AS1	0.254725815213413	6.52620659069271e-05	0.000962111835435182
ENSG00000267078	RP11-666A8.9	0.527840791894418	6.58273059479136e-05	0.000969267157862439
ENSG00000023318	ERP44	0.266228422110317	6.60721699021972e-05	0.00097221749800196
ENSG00000100320	RBFOX2	-0.652441413237487	6.63067225778886e-05	0.00097501224431322
ENSG00000204466	DGKK	-0.791754974604206	6.67020820996649e-05	0.000980166238036165
ENSG00000156471	PTDSS1	-0.204664799401561	6.67695022868634e-05	0.000980497576928933
ENSG00000127954	STEAP4	0.516301977865407	6.68962109366235e-05	0.000981633621472105
ENSG00000235781	XXbac-BPG249D20.9	0.651103709530502	6.69367120952559e-05	0.000981633621472105
ENSG00000170624	SGCD	-0.831036840484816	6.72801223102441e-05	0.000986008016499761
ENSG00000120265	PCMT1	0.342761470599956	6.77122742470313e-05	0.000991233293194798
ENSG00000171824	EXOSC10	-0.22793513012208	6.77273949356932e-05	0.000991233293194798
ENSG00000105339	DENND3	0.443197306464497	6.79465615775594e-05	0.000993775312604586
ENSG00000119596	YLPM1	-0.258915401896496	6.911933837966e-05	0.0010102519484508
ENSG00000260290	CTD-2033A16.2	-0.242689829207392	6.91967875237413e-05	0.0010107078904955
ENSG00000142185	TRPM2	0.456784193860127	6.93056752334951e-05	0.00101133118459387
ENSG00000213830	CFL1P5	0.62672887820418	6.93320266588081e-05	0.00101133118459387
ENSG00000122741	DCAF10	0.261395514391317	6.94113512875669e-05	0.00101181283321189
ENSG00000110888	CAPRIN2	-0.288553271469155	6.96497655413106e-05	0.00101461135122878
ENSG00000138363	ATIC	-0.287149494162172	6.97974731234993e-05	0.00101608566637014
ENSG00000145545	SRD5A1	0.266793680690106	7.00432491938896e-05	0.00101898471247382
ENSG00000174125	TLR1	0.429669454860537	7.03202648769946e-05	0.00102233407041065
ENSG00000265168	RP11-192H23.5	-0.472067186521788	7.04241240980478e-05	0.00102316325509737
ENSG00000141458	NPC1	-0.26714359854365	7.0638265180279e-05	0.00102559251325866
ENSG00000139725	RHOF	-0.222864329219399	7.08880566656414e-05	0.00102853580757034
ENSG00000087263	OGFOD1	-0.218695008041521	7.11136070107069e-05	0.00103112370722691
ENSG00000103528	SYT17	-0.653186643513227	7.14546187167074e-05	0.00103538121590104
ENSG00000134954	ETS1	-0.356570474635052	7.15847594888114e-05	0.00103570020282584
ENSG00000143365	RORC	-0.553844052343845	7.16662261073943e-05	0.00103570020282584
ENSG00000159314	ARHGAP27	0.353829350024464	7.16206937726923e-05	0.00103570020282584
ENSG00000236754	AC004019.13	0.789728877997623	7.1636269577141e-05	0.00103570020282584
ENSG00000249096	RP11-290F5.1	0.565989003034986	7.18120005298908e-05	0.00103712096733552
ENSG00000183856	IQGAP3	0.785614284556105	7.22966333507766e-05	0.00104343047248865
ENSG00000163162	RNF149	0.436357113617693	7.25487860529546e-05	0.00104637856372483
ENSG00000214548	MEG3	-0.782711616062702	7.27536321363011e-05	0.00104864090752659
ENSG00000243797	CTB-111H14.1	0.775017705707167	7.31910652775246e-05	0.00105425047289334
ENSG00000226125	AC098823.3	0.714179809729772	7.35074067641286e-05	0.00105810958182014
ENSG00000115306	SPTBN1	-0.323463009181742	7.35932342600725e-05	0.00105864763779911
ENSG00000008323	PLEKHG6	0.470929429382982	7.41244465006296e-05	0.00106418743790096
ENSG00000011304	PTBP1	-0.190241071376446	7.40380741817797e-05	0.00106418743790096
ENSG00000159784	FAM131B	-0.519418775743949	7.41080319999635e-05	0.00106418743790096
ENSG00000234389	AC007278.3	0.699082155935895	7.4232968757771e-05	0.00106504569949183
ENSG00000070371	CLTCL1	0.529441262595056	7.4290104965941e-05	0.0010651660653614
ENSG00000100097	LGALS1	0.411572876607311	7.46697868215455e-05	0.00106990787661481
ENSG00000090013	BLVRB	0.359655005542692	7.48979029930166e-05	0.0010724731836831
ENSG00000102796	DHRS12	0.426209457152665	7.51835344179128e-05	0.00107585816016098
ENSG00000100368	CSF2RB	0.460129485725144	7.55719506217512e-05	0.00108009892315428
ENSG00000165682	CLEC1B	0.557718906364685	7.55787494166353e-05	0.00108009892315428
ENSG00000225422	RBMS1P1	0.465587406833388	7.57547958540831e-05	0.00108190721843632
ENSG00000256448	RP11-809N8.4	0.514265654385706	7.64864039598049e-05	0.00109164233372025
ENSG00000005075	POLR2J	0.263594698858491	7.66999376819828e-05	0.00109397541663773
ENSG00000112333	NR2E1	0.781240725413185	7.72866905353267e-05	0.00110162522823707
ENSG00000158773	USF1	0.280096041364945	7.73529039913319e-05	0.00110185026409035
ENSG00000166278	C2	0.672669256525901	7.89168857339851e-05	0.00112339600662756
ENSG00000135423	GLS2	-0.355161196050343	7.96715326411585e-05	0.00113340016910283
ENSG00000136709	WDR33	-0.128313315571632	7.98665147951666e-05	0.00113543475262797
ENSG00000158321	AUTS2	-0.438879506531162	8.04063118802309e-05	0.00114236561826718
ENSG00000064763	FAR2	0.434241527247152	8.07198353821448e-05	0.0011460748037266
ENSG00000137462	TLR2	0.515906607522624	8.11170378959139e-05	0.00115096649030105
ENSG00000112335	SNX3	0.243745127306789	8.12409734828617e-05	0.00115149046672368
ENSG00000116514	RNF19B	0.412147192794038	8.12905919150395e-05	0.00115149046672368
ENSG00000213762	ZNF134	-0.234482750941392	8.13120584941024e-05	0.00115149046672368
ENSG00000185278	ZBTB37	0.417936221293011	8.16843489200015e-05	0.00115601341207963
ENSG00000100014	SPECC1L	-0.209766914316601	8.28410109279864e-05	0.00117086606066457
ENSG00000131845	ZNF304	-0.336299690719071	8.28002785531942e-05	0.00117086606066457
ENSG00000068323	TFE3	0.361175269025541	8.31069806213732e-05	0.001173865955758
ENSG00000104892	KLC3	0.632625102633752	8.32951125919736e-05	0.00117576324628373
ENSG00000157483	MYO1E	-0.523890948172819	8.33781458768407e-05	0.00117617551036465
ENSG00000174007	CEP19	0.437315592898091	8.37870319543244e-05	0.00118118092595738
ENSG00000135334	AKIRIN2	0.344056753629881	8.38557063105219e-05	0.00118138687207686
ENSG00000007264	MATK	-0.424056345629131	8.40106827129014e-05	0.001182807621108
ENSG00000215284	RP11-198M15.1	0.793925395063731	8.44267189702097e-05	0.00118789970136385
ENSG00000135457	TFCP2	-0.218317890583055	8.46079486865978e-05	0.00118968358220775
ENSG00000053524	MCF2L2	0.430685864629387	8.47586881000915e-05	0.00119000506917148
ENSG00000138069	RAB1A	0.259625625329862	8.47222520661871e-05	0.00119000506917148
ENSG00000164818	HEATR2	-0.228098964694178	8.47941921513888e-05	0.00119000506917148
ENSG00000011007	TCEB3	-0.205113419976046	8.54718669781389e-05	0.00119874567736798
ENSG00000113273	ARSB	0.338927720347802	8.5652173994769e-05	0.00120050394737633
ENSG00000256249	RP11-324E6.6	0.480500428222898	8.6640216021809e-05	0.00121357394890548
ENSG00000261644	RP11-327F22.2	0.340120482137525	8.6699591710233e-05	0.00121362766076893
ENSG00000175216	CKAP5	-0.335581941338451	8.67947640984401e-05	0.00121418206806339
ENSG00000100385	IL2RB	-0.426938608630842	8.70575320627845e-05	0.00121644155523901
ENSG00000186260	MKL2	-0.375336279976518	8.70676212710544e-05	0.00121644155523901
ENSG00000225996	AL356356.1	0.562781805844439	8.83075426858299e-05	0.00123297643145564
ENSG00000124228	DDX27	-0.191010072519732	8.8480804942955e-05	0.00123381880587652
ENSG00000232334	RP11-47G11.2	0.608108286404786	8.84282027006063e-05	0.00123381880587652
ENSG00000017621	MAGIX	0.435533565266427	8.91488821356406e-05	0.00123904591826871
ENSG00000099204	ABLIM1	-0.37511125705066	8.89448106791518e-05	0.00123904591826871
ENSG00000165490	C11orf82	0.464167505875155	8.90368684322892e-05	0.00123904591826871
ENSG00000167037	SGSM1	-0.50085251534723	8.91958825425238e-05	0.00123904591826871
ENSG00000181817	LSM10	0.228323263059602	8.91524456468806e-05	0.00123904591826871
ENSG00000186409	CCDC30	0.330129194450042	8.9140790980928e-05	0.00123904591826871
ENSG00000138755	CXCL9	0.762648394794995	8.95357616584257e-05	0.00124297708259102
ENSG00000015676	NUDCD3	-0.169250006269037	8.97228191808141e-05	0.00124399322456851
ENSG00000232599	RP1-161N10.1	0.820336960963983	8.96887908116628e-05	0.00124399322456851
ENSG00000150045	KLRF1	-0.607811625576282	8.98176403241553e-05	0.00124451823634947
ENSG00000162437	RAVER2	-0.507483419835043	8.99758048655412e-05	0.00124591971617043
ENSG00000103512	NOMO1	-0.355177283149834	9.02431910837795e-05	0.0012481679716332
ENSG00000158874	APOA2	0.666804223133427	9.02883273341148e-05	0.0012481679716332
ENSG00000204574	ABCF1	-0.257252976505112	9.03666528361963e-05	0.0012481679716332
ENSG00000258967	HMGN1P3	0.648399076632895	9.03429820885477e-05	0.0012481679716332
ENSG00000058056	USP13	-0.372257765222278	9.12475082231553e-05	0.00125952050547519
ENSG00000253701	AL928768.3	-0.684904767444227	9.13038524860508e-05	0.00125952050547519
ENSG00000100221	JOSD1	-0.185062245863781	9.13811039026806e-05	0.00125979085260408
ENSG00000115590	IL1R2	0.682354097780113	9.22118169198122e-05	0.00127044162138387
ENSG00000215196	AC091878.1	0.637399797940983	9.27736216171373e-05	0.0012773764372754
ENSG00000205269	TMEM170B	0.432516435776883	9.28371217897089e-05	0.00127744581122603
ENSG00000164659	KIAA1324L	-0.553712192444164	9.35948030060594e-05	0.00128706107016073
ENSG00000111786	SRSF9	0.111876148457948	9.43012305869332e-05	0.0012959598676447
ENSG00000112195	TREML2	0.436969471608887	9.44626090097628e-05	0.00129654677730674
ENSG00000167900	TK1	0.589861112830219	9.44214638303477e-05	0.00129654677730674
ENSG00000257743	RP11-1220K2.2	0.678237045100499	9.4642706662074e-05	0.0012982032537809
ENSG00000146592	CREB5	0.48895659156086	9.50768514570108e-05	0.00130252306030542
ENSG00000263786	RP11-649A18.4	0.544293561055188	9.5065688711936e-05	0.00130252306030542
ENSG00000124588	NQO2	0.458395816798672	9.58233936505551e-05	0.00131110643372466
ENSG00000145675	PIK3R1	-0.323719299258091	9.577180644949e-05	0.00131110643372466
ENSG00000139160	METTL20	0.331497479256323	9.59995254700455e-05	0.00131269438738796
ENSG00000173212	MAB21L3	0.736263075339772	9.66785934555539e-05	0.00132115318674003
ENSG00000153093	ACOXL	0.705192398668353	9.68502271674781e-05	0.00132267144614785
ENSG00000260859	RP11-254F19.2	0.775236306996773	9.75433825782059e-05	0.00133130571687469
ENSG00000267288	RP13-890H12.2	0.797416983360815	9.77401777326884e-05	0.00133315894109674
ENSG00000115145	STAM2	0.307291862329321	9.8115537073098e-05	0.0013357773212363
ENSG00000181481	RNF135	0.332883967000362	9.80237800579003e-05	0.0013357773212363
ENSG00000235621	LINC00494	-0.671248465585761	9.80902382563222e-05	0.0013357773212363
ENSG00000135535	CD164	0.322477129122512	9.82002920013435e-05	0.00133609874254132
ENSG00000189325	C6orf222	0.813994869036932	9.82706009986613e-05	0.00133622333691459
ENSG00000145016	KIAA0226	0.330296735224601	9.84780263048986e-05	0.00133821104029126
ENSG00000257764	RP11-1143G9.4	0.504044459641009	9.86632648574098e-05	0.00133989496606542
ENSG00000129465	RIPK3	0.29264865987624	9.92786595321902e-05	0.00134741490027198
ENSG00000241847	RP1-20N2.4	-0.742730337255365	9.95334935633803e-05	0.00135003498935656
ENSG00000090382	LYZ	0.497741192148431	9.96271196399505e-05	0.00135046661988372
ENSG00000120458	MSANTD2	-0.310048510929795	9.99750690826613e-05	0.00135434298482655
ENSG00000256663	RP11-424C20.2	0.749408287602023	0.000101340698957749	0.00137199232523283
ENSG00000185158	LRRC37B	0.209387662540899	0.000101718611065087	0.00137625595689363
ENSG00000256553	TRAV1-2	-0.562350469055687	0.000101816355327755	0.00137672597788785
ENSG00000156671	SAMD8	0.368346102933786	0.000102021718965561	0.00137864971002874
ENSG00000147324	MFHAS1	-0.296961213187778	0.000102646385733851	0.00138537750134056
ENSG00000226380	AC058791.1	0.471062125869059	0.000102610418753471	0.00138537750134056
ENSG00000228113	AC003991.3	0.515084321245175	0.000103414489044989	0.00139488271612472
ENSG00000198929	NOS1AP	0.751289837702954	0.000103877525764472	0.00140026392071528
ENSG00000183495	EP400	-0.226042560709152	0.000104280228788001	0.00140482569620629
ENSG00000262362	LA16c-380H5.2	0.624465611999286	0.000104606529462006	0.00140835321951589
ENSG00000163421	PROK2	0.558342743602168	0.000105407719070427	0.00141826605259107
ENSG00000138180	CEP55	0.732076190514765	0.000105511298841631	0.00141878608676214
ENSG00000188897	CTD-3088G3.8	0.560767916060532	0.000105602562479262	0.00141913997093134
ENSG00000105383	CD33	0.356216544526603	0.000106168725747403	0.00142587143595974
ENSG00000169692	AGPAT2	0.332120409041279	0.000106970947218691	0.00143576300225775
ENSG00000133026	MYH10	0.411427317952099	0.000107427824375114	0.00144101006164555
ENSG00000151743	AMN1	0.387199613653973	0.000107570682115421	0.0014420410888982
ENSG00000047578	KIAA0556	0.313751073111697	0.000107740122430597	0.00144342698665296
ENSG00000198673	FAM19A2	0.567667917793408	0.000108086730095911	0.00144718329615549
ENSG00000265206	hsa-mir-142	0.325401468591935	0.00010851819983748	0.00145207053560856
ENSG00000144036	EXOC6B	-0.281579671740456	0.000108729832313807	0.00145401197422828
ENSG00000244071	RPL9P33	0.626297796429645	0.000108832301437923	0.00145449212154132
ENSG00000267430	RP11-635N19.2	0.634649539456564	0.000109140152444027	0.00145771483560784
ENSG00000142046	TMEM91	0.420418327481622	0.000109319225804952	0.0014592146628369
ENSG00000171862	PTEN	0.407043649413073	0.00010974973506909	0.00146406682600409
ENSG00000185031	RP11-182I10.4	0.622108324808026	0.000109852602179945	0.00146432435198185
ENSG00000205565	RP11-497H16.6	0.750977867406292	0.000109903067925964	0.00146432435198185
ENSG00000168454	TXNDC2	0.765558885107246	0.000110143870647756	0.00146663846284224
ENSG00000067141	NEO1	-0.477617301383122	0.000110863597402299	0.00147532306141147
ENSG00000206177	HBM	0.624638480411764	0.000111252795134051	0.00147960123339875
ENSG00000263120	RP5-1107A17.4	0.540342312219478	0.000111552495011309	0.00148268465236747
ENSG00000265298	RP13-104F24.3	0.288055975558586	0.000111854947177573	0.0014858008819314
ENSG00000260256	AP001063.1	0.804511782369545	0.000112594486272395	0.00149471574698548
ENSG00000163812	ZDHHC3	0.207992920815679	0.000112822658030277	0.00149683539806897
ENSG00000197016	ZNF470	-0.364902349460717	0.000113387735015836	0.00150341953751883
ENSG00000233013	FAM157B	0.678955027219958	0.000113464349920729	0.001503523050405
ENSG00000138375	SMARCAL1	-0.25290464642372	0.00011353879119804	0.00150359765240507
ENSG00000184357	HIST1H1B	0.804315527051415	0.000113608760902535	0.00150361298272641
ENSG00000081760	AACS	-0.276764365843943	0.00011386869289273	0.00150522976914642
ENSG00000116489	CAPZA1	0.365489683319663	0.000113864110396817	0.00150522976914642
ENSG00000063046	EIF4B	-0.27701072413893	0.000113945236834099	0.00150533093715956
ENSG00000164144	ARFIP1	0.348132413994458	0.000114152671507607	0.00150625001516469
ENSG00000231346	RP5-836N10.1	0.492196976679595	0.000114128051365798	0.00150625001516469
ENSG00000198113	TOR4A	0.354455363567268	0.000114382730979839	0.00150837480666293
ENSG00000186529	CYP4F3	0.515977985551859	0.000114886176742185	0.00151410002894662
ENSG00000244255	CFB	0.67772856210323	0.000115180015977314	0.00151705758235099
ENSG00000231256	C17orf105	0.767120900462617	0.000115400777733315	0.00151813509587638
ENSG00000243449	C4orf48	0.442843779072101	0.000115394601210772	0.00151813509587638
ENSG00000011376	LARS2	-0.228819129629344	0.000116124803846012	0.00152674072734008
ENSG00000163362	C1orf106	0.777699738654468	0.000116309090292023	0.00152824409619422
ENSG00000184117	NIPSNAP1	-0.182709516528478	0.000116421278541062	0.00152879889266871
ENSG00000186354	C9orf47	0.559514850215355	0.000116498954621921	0.00152890009456072
ENSG00000010704	HFE	0.355106376359599	0.000116801064776554	0.0015319448177866
ENSG00000103423	DNAJA3	-0.212902052635751	0.000117026153796649	0.00153305664664903
ENSG00000146963	LUC7L2	-0.180040214314716	0.000116988380089561	0.00153305664664903
ENSG00000163156	SCNM1	0.237244151288843	0.000118023553130919	0.00154519632082907
ENSG00000164045	CDC25A	0.752649356271521	0.000118173112496983	0.00154622795279735
ENSG00000237984	PTENP1	0.418196715693091	0.000118734104784813	0.00155263849410709
ENSG00000134014	ELP3	-0.222642986890759	0.000118971970127218	0.0015548184923743
ENSG00000263466	RP1-56K13.2	0.618209141451262	0.000119048895492293	0.00155489385260137
ENSG00000160796	NBEAL2	0.39268420337902	0.000119134539389626	0.00155508292724177
ENSG00000245080	RP11-320N21.1	0.701170258191981	0.000119352216963396	0.00155699420469681
ENSG00000184271	POU6F1	-0.371385784451626	0.000120023991171899	0.00156443186005252
ENSG00000185989	RASA3	-0.231669029657896	0.000120065545252303	0.00156443186005252
ENSG00000139132	FGD4	0.468523674714615	0.000120236640559331	0.00156564364946772
ENSG00000170866	LILRA3	0.601898066395752	0.000120301848311578	0.00156564364946772
ENSG00000237399	RP11-298E9.3	-0.243372327974403	0.000120683993454809	0.00156943499175234
ENSG00000256812	CAPNS2	0.730286279103609	0.000120736818504219	0.00156943499175234
ENSG00000180447	GAS1	-0.711291933018469	0.000121937578643408	0.00158315985201255
ENSG00000258920	FOXN3-AS1	0.479575112538492	0.000121897243837572	0.00158315985201255
ENSG00000186162	CIDECP	0.223677331829213	0.000122183592882786	0.00158541192878965
ENSG00000111667	USP5	-0.247648041692777	0.000122276155189391	0.00158567137509993
ENSG00000162433	AK4	0.663528752071312	0.000122479648713554	0.0015873682111743
ENSG00000106617	PRKAG2	0.29635082197001	0.000122581099758702	0.00158774132236361
ENSG00000103932	RPAP1	-0.274188820648965	0.000122826957190955	0.0015899833184713
ENSG00000185811	IKZF1	-0.208311175128558	0.000123763444708317	0.00160115750759114
ENSG00000198848	CES1	0.648498037333707	0.000124235560572952	0.00160631433969205
ENSG00000155252	PI4K2A	-0.225477833348138	0.00012446528890787	0.00160833295560371
ENSG00000132825	PPP1R3D	0.353328555740711	0.000124780240653968	0.00161144978636516
ENSG00000168275	COA6	0.372529989214342	0.000125102266388429	0.00161465423677116
ENSG00000256349	BBS1	-0.220424675709558	0.000125288356794469	0.00161610146653833
ENSG00000231890	AC093391.2	0.460048635106345	0.000125514395030011	0.00161806197392376
ENSG00000129187	DCTD	-0.179973357098135	0.000126070676280408	0.00162427496898773
ENSG00000155099	TMEM55A	0.398751884479233	0.000126926973951198	0.00163434372882006
ENSG00000143257	NR1I3	0.375023140001591	0.000127843643099404	0.00164517752966142
ENSG00000236609	ZNF853	-0.351260590108392	0.00012869011661472	0.00165509578466642
ENSG00000168306	ACOX2	0.715048479252226	0.000129120256312569	0.00165965101216821
ENSG00000092020	PPP2R3C	0.32430353092307	0.000129292470320549	0.00165991173265236
ENSG00000184574	LPAR5	-0.34311830720041	0.000129276839386902	0.00165991173265236
ENSG00000102931	ARL2BP	-0.17802123868175	0.000130133235736206	0.00166972479980731
ENSG00000089486	CDIP1	-0.29439995072197	0.0001305056345262	0.0016705791564335
ENSG00000164327	RICTOR	0.438091040964078	0.000130496086716661	0.0016705791564335
ENSG00000177663	IL17RA	0.40013530649746	0.000130411844182878	0.0016705791564335
ENSG00000182308	DCAF4L1	0.535205022513799	0.000130468508676397	0.0016705791564335
ENSG00000229320	KRT8P12	0.321407357616644	0.00013065598597872	0.00167152456066804
ENSG00000070019	GUCY2C	0.633484438419842	0.000130792613733507	0.00167229338952069
ENSG00000116106	EPHA4	-0.428011947572826	0.00013125440900708	0.0016762361725387
ENSG00000177182	CLVS1	0.573394786380217	0.000131211011827522	0.0016762361725387
ENSG00000053371	AKR7A2	-0.254553980288383	0.000131450891827313	0.00167776485824686
ENSG00000168591	TMUB2	0.268416834052691	0.000131874089265893	0.0016821837271156
ENSG00000178035	IMPDH2	-0.224486234049112	0.000132006903864079	0.00168289548210851
ENSG00000262657	RP11-170L3.8	0.499850036083178	0.000132090026396181	0.0016829732750921
ENSG00000115325	DOK1	0.273653040883831	0.000133428378223178	0.0016990346693209
ENSG00000100027	YPEL1	-0.26594652414812	0.000133871842935461	0.00170368878275058
ENSG00000143811	PYCR2	-0.174793307280373	0.000134796099691621	0.00171445260440141
ENSG00000231494	AC104634.3	-0.734518973373142	0.000135629429525759	0.00172404808875356
ENSG00000259922	RP11-322D14.1	0.582948009186468	0.000135818989576788	0.00172545391932697
ENSG00000162896	PIGR	-0.781696609489927	0.000136362165801173	0.00173134787037852
ENSG00000062485	CS	-0.239322847511315	0.000136867387905151	0.00173675336417855
ENSG00000143845	ETNK2	-0.474487936792206	0.000137006605520168	0.00173735339767059
ENSG00000165271	NOL6	-0.217003601882269	0.000137073692626612	0.00173735339767059
ENSG00000073331	ALPK1	0.424235231071036	0.000137401581990477	0.00174049969163705
ENSG00000163214	DHX57	-0.288494980779094	0.000138099878291599	0.00174833165732893
ENSG00000112303	VNN2	0.462951678816207	0.000138629989226921	0.00175301151307722
ENSG00000140598	EFTUD1	-0.256382202531455	0.000138575099397727	0.00175301151307722
ENSG00000167676	PLIN4	0.553366624966916	0.000138723612971539	0.00175318083692371
ENSG00000182134	TDRKH	-0.294566846597589	0.000139035517011562	0.00175610698394199
ENSG00000101079	NDRG3	-0.230762674784864	0.000140138221252739	0.0017690122891933
ENSG00000171943	SRGAP2C	0.623956275656277	0.000141067837018678	0.00177971899924662
ENSG00000013364	MVP	0.329991997208597	0.000141185526018692	0.00177979203300209
ENSG00000065618	COL17A1	0.75463837439654	0.000141236528544488	0.00177979203300209
ENSG00000124222	STX16	0.207161335606652	0.000141708566833007	0.00178471117802193
ENSG00000225193	RPS12P26	0.532200728166423	0.000143070994723123	0.00180083197332659
ENSG00000186141	POLR3C	-0.183545050804068	0.00014316659318264	0.00180099782822905
ENSG00000224126	UBE2SP2	0.515266561200196	0.00014346932154214	0.00180376763234597
ENSG00000111912	NCOA7	0.357650859233629	0.000143946144106094	0.00180872179118014
ENSG00000161944	ASGR2	0.490218236753377	0.000144544021309652	0.00181276488889833
ENSG00000173171	MTX1	0.352413810322035	0.000144515500257634	0.00181276488889833
ENSG00000198176	TFDP1	0.278347710516686	0.000144599752933495	0.00181276488889833
ENSG00000240618	RP11-206L10.5	0.546980699907743	0.000144527890364163	0.00181276488889833
ENSG00000157349	DDX19B	-0.218473996173208	0.000145372822867173	0.00182141144063681
ENSG00000224345	AKIRIN2-AS1	0.476386072248644	0.000145466008830291	0.00182153453234996
ENSG00000104325	DECR1	0.234426243144873	0.000145833626789474	0.00182487938692915
ENSG00000254006	RP11-1D12.2	0.780656832263642	0.000145900155094285	0.00182487938692915
ENSG00000132432	SEC61G	0.311964785310483	0.000146024377584344	0.00182538825777774
ENSG00000171476	HOPX	-0.454462001014794	0.000146484601743694	0.00182904859011512
ENSG00000184682	C11orf89	0.404812286230986	0.000146442539524223	0.00182904859011512
ENSG00000148218	ALAD	-0.159746226290092	0.000146801677290338	0.00182987076467266
ENSG00000156453	PCDH1	-0.656736479088659	0.000146710715318448	0.00182987076467266
ENSG00000167972	ABCA3	-0.356789808385637	0.000146790699518285	0.00182987076467266
ENSG00000007402	CACNA2D2	-0.442989326154048	0.000146921533565736	0.00183032065561283
ENSG00000033327	GAB2	0.466025232238549	0.000147084005872336	0.00183130063379853
ENSG00000128203	ASPHD2	0.352060860611669	0.000147334301726235	0.00183337233884964
ENSG00000265778	RP11-17M16.2	0.632695647253404	0.000147513355606971	0.00183455568205346
ENSG00000148848	ADAM12	-0.656667385161344	0.000147897033312723	0.00183828104375217
ENSG00000144040	SFXN5	0.320712387674646	0.000148015404322123	0.00183870642401518
ENSG00000258529	ALG9	-0.255832951061854	0.00014813152637123	0.00183910339928281
ENSG00000268485	AC104841.2	-0.268993485871027	0.000148410894508058	0.00184152552861759
ENSG00000132604	TERF2	-0.193019215081448	0.000149318347869976	0.00185173394966336
ENSG00000232842	RP5-961K14.1	-0.505501610120345	0.000150219863522325	0.00186185719672508
ENSG00000107554	DNMBP	-0.414909182846285	0.000150574245055331	0.00186426076595433
ENSG00000226312	CFLAR-AS1	0.449728736978593	0.000150584424141201	0.00186426076595433
ENSG00000102312	PORCN	-0.268089969243127	0.00015098646785141	0.00186712241597122
ENSG00000185920	PTCH1	-0.428327077385072	0.000150952999151877	0.00186712241597122
ENSG00000268816	CTD-3093M3.1	0.500395482856211	0.000151344029150013	0.00187048550959103
ENSG00000055163	CYFIP2	-0.231961190674181	0.000152115339234457	0.00187789394215374
ENSG00000163131	CTSS	0.32267631315562	0.000152077589193535	0.00187789394215374
ENSG00000121774	KHDRBS1	-0.171934379182027	0.000152977681396965	0.00188215952489025
ENSG00000122507	BBS9	-0.301603979901886	0.000152640325531937	0.00188215952489025
ENSG00000171223	JUNB	0.377921259490362	0.000152747101858635	0.00188215952489025
ENSG00000185947	ZNF267	0.488379278678957	0.00015275534712639	0.00188215952489025
ENSG00000228253	MT-ATP8	-0.389178162791633	0.000152939709456452	0.00188215952489025
ENSG00000229512	AC068580.5	0.587417513282363	0.000152851939332546	0.00188215952489025
ENSG00000089351	GRAMD1A	0.354301493454611	0.000153182784841844	0.00188325546787701
ENSG00000228144	TMBIM4	0.280919834295379	0.000153239129645569	0.00188325546787701
ENSG00000168078	PBK	0.789098318160978	0.000153872099149883	0.00188997146628673
ENSG00000253971	CDC42P3	0.782976900939978	0.000154314712730419	0.00189434313925415
ENSG00000120942	UBIAD1	-0.213421513515578	0.00015494411152821	0.00189993478170759
ENSG00000240682	ISY1	0.182492706184085	0.000154919808270517	0.00189993478170759
ENSG00000144228	SPOPL	0.405981086410313	0.000156287779253199	0.00191478606133848
ENSG00000184005	ST6GALNAC3	0.463079517311677	0.000156330526448576	0.00191478606133848
ENSG00000141101	NOB1	-0.220668605766118	0.000156426918618605	0.00191489333262472
ENSG00000159322	ADPGK	0.182478778676935	0.000156915905503548	0.00191980372405264
ENSG00000240583	AQP1	0.600535170600568	0.000157735774269857	0.00192875456271441
ENSG00000135636	DYSF	0.512200619302372	0.00015823927561093	0.00193274813380348
ENSG00000183250	C21orf67	0.381959379674744	0.000158165619097301	0.00193274813380348
ENSG00000102081	FMR1	0.345622607807873	0.00015856013660445	0.00193558522063902
ENSG00000100722	ZC3H14	-0.234131868648285	0.000158883858271552	0.00193845404081055
ENSG00000205821	RP1-59D14.3	-0.393349624882735	0.000159001165497784	0.00193880271612281
ENSG00000166016	ABTB2	0.436917269428106	0.000159429692600643	0.0019429437886317
ENSG00000148459	PDSS1	0.365776340440525	0.00015996720567864	0.00194734096307834
ENSG00000175274	TP53I11	0.458230827275146	0.000159968744163911	0.00194734096307834
ENSG00000213523	SRA1	0.282709141679894	0.000160454197841052	0.00195211244372118
ENSG00000230724	RP11-304M2.2	0.526023867430119	0.000160539383157154	0.00195211244372118
ENSG00000136504	KAT7	-0.222099922246942	0.000161031686694294	0.00195700966960901
ENSG00000023572	GLRX2	0.331157270641805	0.00016123352793884	0.0019583734402399
ENSG00000099804	CDC34	0.281899106288648	0.000161616421889357	0.00196193357483574
ENSG00000143862	ARL8A	0.281609944822485	0.00016209989300451	0.00196671002889592
ENSG00000123636	BAZ2B	0.416302488994857	0.000162876602177186	0.0019748184829683
ENSG00000253950	AC020907.6	0.338903345825828	0.000162948959992304	0.0019748184829683
ENSG00000129255	MPDU1	0.243461731778331	0.00016335360365943	0.00197737492617187
ENSG00000158481	CD1C	-0.514519698362436	0.000163419186955851	0.00197737492617187
ENSG00000216624	GAPDHP72	0.460406447239334	0.000163431381477571	0.00197737492617187
ENSG00000102218	RP2	0.438658102679143	0.000164201948257929	0.00198559865599558
ENSG00000185104	FAF1	-0.24402060329731	0.000164343666694948	0.00198621319742882
ENSG00000264133	AC006953.1	0.77771937725218	0.000164788683431927	0.00199049061452241
ENSG00000262519	RP11-141J13.4	0.764847963286899	0.000164994684989932	0.00199187782415193
ENSG00000110077	MS4A6A	0.393817332764907	0.000165364901924715	0.00199501364860018
ENSG00000119977	TCTN3	-0.234195022024997	0.000165437038637294	0.00199501364860018
ENSG00000010803	SCMH1	-0.290893393030103	0.000165727106105978	0.00199740926393917
ENSG00000110079	MS4A4A	0.56920757028605	0.000165948479841747	0.00199897477013342
ENSG00000132965	ALOX5AP	0.488497096973957	0.000167145125657074	0.00201117188366339
ENSG00000172893	DHCR7	-0.343363300273579	0.000167117303240781	0.00201117188366339
ENSG00000136153	LMO7	-0.398588381608804	0.000167593947822495	0.00201435388001613
ENSG00000166337	TAF10	0.196162604410243	0.000167553023242106	0.00201435388001613
ENSG00000110811	LEPREL2	-0.538929632861632	0.000168682028747264	0.00202631721284028
ENSG00000087077	TRIP6	0.320080255053322	0.000169001108330541	0.00202903473523662
ENSG00000265975	CTB-41I6.2	0.456767677919495	0.000169551660984831	0.00203452682272352
ENSG00000268257	AIRN	0.528140813910205	0.000169745479209923	0.00203573461372998
ENSG00000087250	MT3	0.777525532142485	0.000170981542396433	0.00204606663904954
ENSG00000112763	BTN2A1	0.295446754019966	0.000170731675281034	0.00204606663904954
ENSG00000138413	IDH1	0.268438217343917	0.000170919398251782	0.00204606663904954
ENSG00000231841	RP11-206F17.2	0.260288099233937	0.000170893265388634	0.00204606663904954
ENSG00000196873	CBWD3	0.458465899985578	0.000171158218676283	0.00204705978998109
ENSG00000079156	OSBPL6	0.729075536791648	0.000171839061856653	0.00205407841391123
ENSG00000145555	MYO10	0.648132224208348	0.000172079691450179	0.00205583014646138
ENSG00000264304	RP11-20B24.7	0.492194430608724	0.00017234048098186	0.00205782068302439
ENSG00000122641	INHBA	0.783955757635915	0.000172757881190185	0.00206167802396872
ENSG00000173545	ZNF622	0.160301045916347	0.000172882533578171	0.00206203943297851
ENSG00000116016	EPAS1	0.536923152905061	0.000174433258545716	0.00207716802297275
ENSG00000160961	ZNF333	0.31214104563559	0.000174418605895982	0.00207716802297275
ENSG00000203710	CR1	0.487458914193623	0.000174436104624731	0.00207716802297275
ENSG00000233431	RP11-63N8.3	0.664586881804486	0.000174645523190124	0.00207852904533082
ENSG00000235919	ASH1L-AS1	0.324738792886697	0.000175455424928503	0.00208703129565199
ENSG00000189337	KAZN	0.613835034689748	0.000176472252687322	0.00209798432724194
ENSG00000145386	CCNA2	0.56067236342307	0.000176957507239514	0.00210200763967171
ENSG00000170312	CDK1	0.743568315279441	0.000177003068829616	0.00210200763967171
ENSG00000197362	ZNF786	-0.252782368472319	0.000177829757310219	0.00211067790710787
ENSG00000203691	AC092811.1	0.484431545723182	0.00017849372845296	0.00211740850185973
ENSG00000148110	HIATL1	0.324165157975884	0.000179249552421475	0.00212522081929552
ENSG00000125952	MAX	0.202147404518304	0.00017959117733895	0.00212696304392054
ENSG00000250995	RP13-128O4.3	0.600747211882081	0.000179565142605313	0.00212696304392054
ENSG00000238005	RP11-443B7.1	0.549364572873675	0.000180224799559931	0.00213331099414088
ENSG00000175538	KCNE3	0.354990620893281	0.000180678993374512	0.00213752933634351
ENSG00000174469	CNTNAP2	-0.734279328261675	0.000180999752233726	0.00214016536042162
ENSG00000034063	UHRF1	0.376051977386926	0.000181916420145477	0.00214800128014985
ENSG00000228906	RP13-216E22.4	0.554894522506963	0.000181803327074406	0.00214800128014985
ENSG00000241269	AC093620.5	0.56659807538658	0.000181957364402425	0.00214800128014985
ENSG00000161640	SIGLEC11	0.702682408245946	0.000182266497127578	0.00215048878441399
ENSG00000187555	USP7	-0.196129516905666	0.00018280271881015	0.00215565148878608
ENSG00000225131	PSME2P2	0.420661942206815	0.000183324947109045	0.00216064369971938
ENSG00000251184	RP11-101E3.5	-0.530807428811592	0.00018362904903707	0.0021630611053957
ENSG00000196547	MAN2A2	0.346538970172843	0.000184135959261773	0.00216786360227855
ENSG00000236308	RP11-316M21.7	0.564691732222479	0.000184356583272735	0.00216929224614568
ENSG00000164708	PGAM2	0.404020292604609	0.000184827017234421	0.00217365724089845
ENSG00000080986	NDC80	0.515847352622719	0.000185479353636222	0.00218015565158961
ENSG00000125726	CD70	0.646144457532722	0.000186251569736346	0.00218805540339188
ENSG00000028116	VRK2	0.363533657544488	0.00018675842454009	0.00219283091597287
ENSG00000109332	UBE2D3	0.259376438490015	0.000187270711652236	0.0021955287426959
ENSG00000139832	RAB20	0.461676628952716	0.000187245268257019	0.0021955287426959
ENSG00000152465	NMT2	-0.27990287079383	0.000187490578640362	0.0021955287426959
ENSG00000186152	LILRP1	0.617541846158907	0.000187463148649266	0.0021955287426959
ENSG00000260916	CCPG1	0.382402756999782	0.000187450373756853	0.0021955287426959
ENSG00000184708	EIF4ENIF1	-0.184350917175205	0.000188313850216014	0.00220398818482599
ENSG00000183735	TBK1	0.347294210101482	0.000190547452494116	0.00222893596597908
ENSG00000248988	RP11-815N9.2	0.554895212559413	0.000191862901658341	0.00224312266673965
ENSG00000111674	ENO2	-0.326445284163019	0.000192064836543251	0.00224428275043133
ENSG00000068024	HDAC4	0.307821678690147	0.000192508869489361	0.00224826900438911
ENSG00000005882	PDK2	-0.273589580598722	0.000192836939481327	0.0022484471856002
ENSG00000163041	H3F3A	0.365177452680085	0.000192817727502283	0.0022484471856002
ENSG00000204397	CARD16	0.491291082424944	0.000192650744548229	0.0022484471856002
ENSG00000261030	RP11-791M20.1	0.753207880673188	0.000192935722529878	0.0022484471856002
ENSG00000143797	MBOAT2	0.454987998491776	0.00019439961457024	0.00226188816718547
ENSG00000171055	FEZ2	0.267818974027993	0.000194379888554085	0.00226188816718547
ENSG00000182885	GPR97	0.507635636401336	0.000194213903593319	0.00226188816718547
ENSG00000112941	PAPD7	-0.187149699295617	0.000195307610238903	0.00227124352918056
ENSG00000139880	CDH24	-0.525679206856417	0.000196313892544601	0.00228173131169791
ENSG00000131558	EXOC4	-0.248900203383443	0.000197589292041279	0.00229411456981615
ENSG00000188735	TMEM120B	-0.203442507640398	0.000197505817626011	0.00229411456981615
ENSG00000100380	ST13	-0.229000218361717	0.000198001275465576	0.00229767704205963
ENSG00000127463	EMC1	-0.176433585175418	0.000198573814699657	0.00230187608753433
ENSG00000249160	RP11-1C1.5	0.688650168884151	0.000198517606855262	0.00230187608753433
ENSG00000261771	DYX1C1-CCPG1	0.389816032551775	0.00019946117537435	0.00231093644915425
ENSG00000184154	LRTOMT	0.205422498068233	0.000200176201001768	0.0023179916100104
ENSG00000204625	HCG9	0.77470257906262	0.000201654006836571	0.00233386742764084
ENSG00000125744	RTN2	0.404052067300294	0.000202176144973129	0.00233867175426566
ENSG00000115652	UXS1	-0.205124539382259	0.000202576722168264	0.00234206558523743
ENSG00000094880	CDC23	-0.251019469219245	0.000202965972290096	0.00234532493945578
ENSG00000197951	ZNF71	-0.21798860897418	0.000203162315833678	0.00234635294042373
ENSG00000112425	EPM2A	-0.315634212365768	0.000203636562380624	0.00234952022967459
ENSG00000172322	CLEC12A	0.621245402156082	0.000203651609308666	0.00234952022967459
ENSG00000235117	RP11-229P13.20	0.398852022507647	0.000203801215930028	0.00235000547191928
ENSG00000226281	RP1-80N2.2	0.692057894522401	0.000204163534715444	0.00235294166511981
ENSG00000105835	NAMPT	0.485632553738101	0.000205845800066204	0.00236923013666834
ENSG00000122952	ZWINT	0.584804335803333	0.000205931667922613	0.00236923013666834
ENSG00000163564	PYHIN1	-0.394393938526859	0.000205925925542697	0.00236923013666834
ENSG00000165685	TMEM52B	0.774505343165763	0.000206054822120574	0.00236923013666834
ENSG00000169105	CHST14	-0.269186838288021	0.000206119010105099	0.00236923013666834
ENSG00000105352	CEACAM4	0.480321079521985	0.000206505738298884	0.00237242738568292
ENSG00000137193	PIM1	0.231052327797993	0.00020691048659585	0.00237539960665413
ENSG00000154589	LY96	0.545987494997716	0.000206981870443891	0.00237539960665413
ENSG00000027001	MIPEP	-0.333565973983009	0.000207143247205681	0.00237600372424742
ENSG00000167671	UBXN6	0.341294473712922	0.000208544268633219	0.00239081889501809
ENSG00000157856	CCDC164	0.751626246520727	0.000209168515719439	0.0023967180057606
ENSG00000144218	AFF3	-0.518848822237558	0.000210140824138447	0.00240373152301754
ENSG00000174944	P2RY14	0.65200879429391	0.000210196475813252	0.00240373152301754
ENSG00000184709	LRRC26	-0.674169964405193	0.000210220627911149	0.00240373152301754
ENSG00000251474	RPL32P3	0.266327253805009	0.000210141720932305	0.00240373152301754
ENSG00000090905	TNRC6A	-0.218939515181846	0.00021124508583473	0.00241418220218342
ENSG00000163520	FBLN2	-0.58533781373928	0.000212274927118351	0.00242468344613857
ENSG00000100154	TTC28	-0.455262821196413	0.000213272209405923	0.00243426351581645
ENSG00000182919	C11orf54	0.241217579466146	0.000213447846611337	0.00243426351581645
ENSG00000257479	RP11-1136G11.7	0.39869119299433	0.000213337238338226	0.00243426351581645
ENSG00000140326	CDAN1	-0.232281395880565	0.000213716072450516	0.00243605106891821
ENSG00000143226	FCGR2A	0.434022479552751	0.000213935044849375	0.00243609142651404
ENSG00000154945	ANKRD40	-0.184134074198191	0.000213942586036357	0.00243609142651404
ENSG00000182319	SGK223	-0.378111991319011	0.000214123226810975	0.00243687845262844
ENSG00000243989	ACY1	-0.269738065157442	0.000214853238046536	0.00244391364110092
ENSG00000242616	GNG10	0.481768304841824	0.000215231659433433	0.00244694432376688
ENSG00000264868	CTB-167B5.2	0.491339476717379	0.000215477981099834	0.00244847080863883
ENSG00000006114	SYNRG	-0.171477653533856	0.000216445329433179	0.00245777085027448
ENSG00000188786	MTF1	0.340773905186521	0.000216521389720304	0.00245777085027448
ENSG00000111321	LTBR	0.369564422763302	0.000217553046921856	0.00246819918395093
ENSG00000131969	ABHD12B	0.520976510403387	0.000218506460575528	0.00247772946031959
ENSG00000135905	DOCK10	-0.264360520189396	0.000219012036315283	0.00248217427672472
ENSG00000256235	SMIM3	0.341393556869747	0.000219589794870651	0.00248743214500705
ENSG00000173262	SLC2A14	0.750168820659432	0.000220112082792135	0.00249205653942535
ENSG00000138640	FAM13A	0.26462307735985	0.000220351252469765	0.00249347240689634
ENSG00000141682	PMAIP1	0.494629237665222	0.0002209666890865	0.0024991424033277
ENSG00000262703	RP11-485G7.6	0.672024071578165	0.000221202623161979	0.00250051656425888
ENSG00000101493	ZNF516	0.390972531991956	0.000222500111220601	0.0025137225322399
ENSG00000117475	BLZF1	0.373287912909255	0.000222600938166867	0.0025137225322399
ENSG00000092201	SUPT16H	-0.185412479028791	0.000223333066079478	0.00251938607480779
ENSG00000175198	PCCA	-0.334725498571844	0.000223319138931676	0.00251938607480779
ENSG00000085978	ATG16L1	-0.169875890050605	0.00022352411820935	0.00252024019968654
ENSG00000103047	TMCO7	-0.213744801122285	0.000225362763485361	0.00253966051826643
ENSG00000153310	FAM49B	0.321766191257808	0.000226311843461143	0.00254904128426259
ENSG00000187260	WDR86	0.319987600411569	0.000227058505051451	0.00255613363929895
ENSG00000068971	PPP2R5B	0.233240595771254	0.000227925941439976	0.00256442643661989
ENSG00000198843	SELT	0.296700791870171	0.000228029864370164	0.00256442643661989
ENSG00000179862	CITED4	0.492666833438656	0.000229733344101286	0.00258225478495741
ENSG00000198744	RP5-857K21.11	-0.356124728968118	0.000230165255659796	0.00258577943517851
ENSG00000180712	RP11-290F5.2	0.592464029067764	0.000231215220028547	0.00259624037658982
ENSG00000113758	DBN1	0.409836127358068	0.000231773817031267	0.00260117600202887
ENSG00000249624	IFNAR2	0.290028712346946	0.000232019946951606	0.00260260157127287
ENSG00000064225	ST3GAL6	0.389035958144757	0.000232636147879767	0.00260817468820974
ENSG00000165795	NDRG2	-0.357138910220494	0.000233547439446986	0.00261704876890057
ENSG00000213462	ERV3-1	0.458396397051973	0.000233829778089258	0.00261886954435079
ENSG00000205846	CLEC6A	0.652561611557718	0.000234954199214672	0.00263011486016383
ENSG00000175970	UNC119B	-0.18463354343269	0.000236167769213425	0.0026423460957924
ENSG00000220785	MTMR9LP	-0.584170761310702	0.000236323979131388	0.00264274066939609
ENSG00000112394	SLC16A10	-0.532680307509321	0.00023657321228682	0.00264374921489838
ENSG00000216490	IFI30	0.396940431081194	0.000236656146828119	0.00264374921489838
ENSG00000269636	AC010441.1	0.340090209702857	0.000237703975678293	0.00265409789092814
ENSG00000196747	HIST1H2AI	0.753945388867073	0.000237872007050987	0.00265461758226308
ENSG00000196419	XRCC6	-0.265329096144598	0.000238580117105917	0.00266116086721868
ENSG00000132170	PPARG	0.726312712620157	0.000238761254664471	0.00266182253860886
ENSG00000229692	SOS1-IT1	0.354087825429039	0.000239402363977736	0.00266760890121239
ENSG00000211721	TRBV6-5	-0.452262878114259	0.00024005526984314	0.00267352074482286
ENSG00000261656	CTD-2258A20.5	0.540850087396141	0.000241174755918141	0.00268462027079332
ENSG00000198938	MT-CO3	-0.340320541535976	0.000241920037781003	0.00269154518612663
ENSG00000257028	C15ORF37	0.370568870486213	0.000242126766734076	0.00269247429002864
ENSG00000224067	RP11-430K21.2	0.559532942228397	0.000242367600333913	0.00269378150299915
ENSG00000264501	Metazoa_SRP	0.65404809758488	0.000242957464484511	0.00269896469570465
ENSG00000055483	USP36	-0.219984088180131	0.000244067530455345	0.00270991849998971
ENSG00000072042	RDH11	-0.229524767471913	0.000245076351325168	0.00271973760934801
ENSG00000082996	RNF13	0.377666298333997	0.000245400130844814	0.00272194835486803
ENSG00000131473	ACLY	-0.250687100009428	0.000245868322619313	0.00272575784756703
ENSG00000086288	NME8	0.485637954674229	0.00024600861938812	0.00272593019383865
ENSG00000124201	ZNFX1	0.386093813208599	0.000247108001124068	0.00273533785844073
ENSG00000260528	FAM157C	0.546034906156402	0.000247010495036628	0.00273533785844073
ENSG00000108424	KPNB1	0.328874317491862	0.000248068528720825	0.00274457996003988
ENSG00000106723	SPIN1	-0.259561957806403	0.00024889561487043	0.0027481219433594
ENSG00000120656	TAF12	0.215060360961299	0.000249122404989033	0.0027481219433594
ENSG00000131187	F12	0.454020009859024	0.000249269035363981	0.0027481219433594
ENSG00000143149	ALDH9A1	-0.259456125751518	0.000249244791012694	0.0027481219433594
ENSG00000160908	ZNF394	0.126143104966124	0.000248700368651458	0.0027481219433594
ENSG00000181929	PRKAG1	0.174130412654467	0.000249062290869352	0.0027481219433594
ENSG00000264584	Metazoa_SRP	0.567962244639362	0.000249014203938245	0.0027481219433594
ENSG00000138738	PRDM5	0.599628168373546	0.000249471277448061	0.00274896464120907
ENSG00000242094	FOXP1-IT1	0.545114977836466	0.000249604324223106	0.00274904439949551
ENSG00000056558	TRAF1	-0.27203626505128	0.000251011405474912	0.00276015757149389
ENSG00000151612	ZNF827	-0.371282740638082	0.000251017169727605	0.00276015757149389
ENSG00000197386	HTT	-0.195394177554535	0.000251118633111979	0.00276015757149389
ENSG00000224295	AC087380.14	0.729608796918081	0.000250861334303037	0.00276015757149389
ENSG00000009694	TENM1	0.560762218218567	0.000251719222738024	0.00276536789142713
ENSG00000255595	RP4-809F18.1	-0.738356871047025	0.000252140006038243	0.0027685986291164
ENSG00000172771	EFCAB12	0.434315396577306	0.000252819964991867	0.00277467054497101
ENSG00000009954	BAZ1B	-0.201244196280547	0.000252985539532599	0.00277509388771427
ENSG00000157350	ST3GAL2	0.377784872444853	0.00025343183062248	0.00277720106867192
ENSG00000171596	NMUR1	-0.461908208653052	0.000253310986833672	0.00277720106867192
ENSG00000100036	SLC35E4	0.358150760425982	0.000253826553346162	0.00278013233943207
ENSG00000110906	KCTD10	-0.188675234380156	0.000255255118454432	0.00279437855378146
ENSG00000236935	AP003774.1	0.527985736470485	0.000255601369050162	0.00279536812568322
ENSG00000261971	RP11-473M20.7	0.500786406364097	0.00025559220108762	0.00279536812568322
[truncated: 2,940 more rows]
