# Supplementary material
Source: HighWire-hosted journal article supplement (https://ard.bmj.com/content/78/8/1079)
Supplement: inline-supplementary-material-13 [file inline-supplementary-material-13.xlsx]

## Sheet: Supplementary table 8
TABLE S8
geneID	Name	Splicing QTL
ENSG00000133106	EPSTI1
ENSG00000160932	LY6E	*
ENSG00000117228	GBP1	*
ENSG00000183019	C19orf59
ENSG00000157601	MX1	*
ENSG00000185507	IRF7	*
ENSG00000128383	APOBEC3A	*
ENSG00000117226	GBP3	*
ENSG00000196358	NTNG2
ENSG00000134809	TIMM10
ENSG00000130489	SCO2	*
ENSG00000122643	NT5C3
ENSG00000187116	LILRA5	*
ENSG00000240065	PSMB9	*
ENSG00000027075	PRKCH
ENSG00000113916	BCL6
ENSG00000183486	MX2
ENSG00000204261	XXbac-BPG246D15.8	*
ENSG00000197746	PSAP
ENSG00000111790	FGFR1OP2
ENSG00000155629	PIK3AP1
ENSG00000125826	RBCK1	*
ENSG00000142687	KIAA0319L
ENSG00000087157	PGS1	*
ENSG00000025708	TYMP	*
ENSG00000177674	AGTRAP
