# Supplementary material
Source: HighWire-hosted journal article supplement (https://ard.bmj.com/content/78/8/1079)
Supplement: inline-supplementary-material-14 [file inline-supplementary-material-14.xlsx]

## Sheet: Supplementary table 9
TABLE S9
geneID	Name	log2FoldChange	pvalue	padj
ENSG00000169385	RNASE2	0.0921968938833156	1.82143719036864e-22	3.98002240467452e-18
ENSG00000257017	HP	0.0880665736644513	1.52227477925451e-19	1.66316131007452e-15
ENSG00000165949	IFI27	0.0786514642829258	4.7671178742785e-19	3.47220975569532e-15
ENSG00000115155	OTOF	0.0738026229106077	5.23835312485262e-17	2.55357886830943e-13
ENSG00000139572	GPR84	0.0779142893079501	5.8431624829743e-17	2.55357886830943e-13
ENSG00000108387	SEPT4	0.0804041830616659	9.2627353334358e-17	3.3733338295151e-13
ENSG00000104918	RETN	0.0775110336353597	5.41869204190654e-16	1.50286990238413e-12
ENSG00000134809	TIMM10	0.0728348193626391	5.50224667936159e-16	1.50286990238413e-12
ENSG00000152766	ANKRD22	0.0783129771937919	1.14961888477977e-15	2.79114691681364e-12
ENSG00000151364	KCTD14	0.071575335261143	2.95678019237225e-15	5.87350945304782e-12
ENSG00000164047	CAMP	0.0773242145242832	2.68960524151363e-15	5.87350945304782e-12
ENSG00000118113	MMP8	0.0745547888602357	4.24588437101838e-15	6.68763161730133e-12
ENSG00000173391	OLR1	0.0744912403431929	4.28478525661154e-15	6.68763161730133e-12
ENSG00000213373	LINC00671	0.0697167845961873	4.21685333212975e-15	6.68763161730133e-12
ENSG00000078081	LAMP3	0.0761121521512525	6.71046643478786e-15	9.77536013776997e-12
ENSG00000242550	SERPINB10	0.075664322568779	1.01342184445248e-14	1.3840175451957e-11
ENSG00000214872	SMTNL1	0.07546572096658	1.21578877355868e-14	1.56271767594299e-11
ENSG00000184979	USP18	0.0744363499931543	1.61808438661663e-14	1.96426455177556e-11
ENSG00000079385	CEACAM1	0.0669034969961405	2.83705262890702e-14	3.26275984180249e-11
ENSG00000183019	C19orf59	0.0645050869282312	3.99531408410005e-14	4.3650804025835e-11
ENSG00000158406	HIST1H4H	0.0647721799301272	4.29587898745212e-14	4.46996436927697e-11
ENSG00000187608	ISG15	0.0726285658119432	4.53386628944282e-14	4.50315964957341e-11
ENSG00000135451	TROAP	0.0705447241915693	7.61076661619991e-14	7.23055918828627e-11
ENSG00000169397	RNASE3	0.0723483791222843	9.81924694039848e-14	8.94001520394364e-11
ENSG00000185885	IFITM1	0.0608622508132192	1.08775221725854e-13	9.50738947972651e-11
ENSG00000096006	CRISP3	0.0719342895114932	1.22607757154705e-13	1.03042388522594e-10
ENSG00000072571	HMMR	0.0724113899715498	1.32356041358325e-13	1.07115254063732e-10
ENSG00000172059	KLF11	-0.0440711683413332	1.56834422487667e-13	1.1817203330269e-10
ENSG00000175643	RMI2	0.0674602213776116	1.54937944831617e-13	1.1817203330269e-10
ENSG00000217275	RP1-34B20.4	0.0709896769647576	1.89069097854756e-13	1.37711628574143e-10
ENSG00000133063	CHIT1	0.0716289417820601	2.42841564442776e-13	1.71171968536745e-10
ENSG00000172183	ISG20	0.0498829036796711	2.79428615309846e-13	1.90806083535482e-10
ENSG00000115884	SDC1	0.0659785916418933	4.09061749073547e-13	2.62894361147238e-10
ENSG00000128342	LIF	0.0708921845337722	4.01165928581276e-13	2.62894361147238e-10
ENSG00000108106	UBE2S	0.0492048525446698	4.80092232187687e-13	2.99728439015233e-10
ENSG00000242371	IGKV1-39	0.0672593193083989	5.30119900127486e-13	3.21768053824603e-10
ENSG00000163958	ZDHHC19	0.0690047131342428	5.71326531112539e-13	3.37406919765948e-10
ENSG00000126709	IFI6	0.0703872974002589	5.92153439117908e-13	3.40503810478037e-10
ENSG00000094804	CDC6	0.0665330306287207	6.23665027178108e-13	3.44660317126119e-10
ENSG00000134827	TCN1	0.0697957564534533	6.30928226856654e-13	3.44660317126119e-10
ENSG00000079393	DUSP13	0.0696923722993684	6.59199194430573e-13	3.51321014573231e-10
ENSG00000163220	S100A9	0.0563740707114007	8.16029315091743e-13	4.24548965811183e-10
ENSG00000225492	GBP1P1	0.0680248485590767	8.64726328424978e-13	4.39421744242191e-10
ENSG00000125148	MT2A	0.0665034521197522	1.82869065025981e-12	8.87971542196157e-10
ENSG00000204936	CD177	0.0678138861658671	1.81319313587091e-12	8.87971542196157e-10
ENSG00000171848	RRM2	0.0679319686094007	2.10495029694925e-12	9.99897150839956e-10
ENSG00000148346	LCN2	0.0677513525739025	2.3364695356352e-12	1.08625948559925e-09
ENSG00000196415	PRTN3	0.0657383508856471	2.54294641965313e-12	1.15762337949668e-09
ENSG00000240671	IGKV1-8	0.0665210767936711	3.17450265269581e-12	1.41563382579706e-09
ENSG00000102096	PIM2	0.0266183175583737	3.29062253593552e-12	1.43806786065454e-09
ENSG00000126787	DLGAP5	0.0673300297586722	4.73549149026856e-12	1.98990816449728e-09
ENSG00000136514	RTP4	0.0660585501571357	4.66515194119688e-12	1.98990816449728e-09
ENSG00000186583	SPATC1	0.0642256651439159	5.0501420387844e-12	2.08208780546185e-09
ENSG00000185338	SOCS1	0.0627668110050551	5.3597136177375e-12	2.16879819002189e-09
ENSG00000170439	METTL7B	0.0672205077899428	5.61571677104312e-12	2.23107322116478e-09
ENSG00000185507	IRF7	0.0637760072096277	5.89720932285633e-12	2.30107001631667e-09
ENSG00000068079	IFI35	0.0608707950838548	6.20008488854122e-12	2.37680798069323e-09
ENSG00000116663	FBXO6	0.0570300285298853	6.59085323040534e-12	2.48304713685495e-09
ENSG00000158006	PAFAH2	-0.0273578635496519	7.38316768201515e-12	2.73439994948666e-09
ENSG00000137959	IFI44L	0.0641082984503856	8.47787958050472e-12	3.08440003368989e-09
ENSG00000188290	HES4	0.0667658394828598	8.61051677520861e-12	3.08440003368989e-09
ENSG00000145287	PLAC8	0.0401960486151458	1.3030059967572e-11	4.59225548953895e-09
ENSG00000179869	ABCA13	0.0650049467236169	1.33328620063349e-11	4.62438678889563e-09
ENSG00000186185	KIF18B	0.0655327447964869	1.3856634674602e-11	4.73095819179264e-09
ENSG00000166803	KIAA0101	0.0657081482751757	1.62557239489858e-11	5.4646742155275e-09
ENSG00000137965	IFI44	0.0646107700308172	1.79474337916368e-11	5.9419602391069e-09
ENSG00000129538	RNASE1	0.0656170283251804	1.91868021856928e-11	6.25747484417275e-09
ENSG00000196141	SPATS2L	0.0654189583773597	2.2524362338669e-11	7.23793884503318e-09
ENSG00000129116	PALLD	-0.0528391004737081	2.42180775481785e-11	7.66940887688766e-09
ENSG00000093009	CDC45	0.0642134183071786	2.60274325924222e-11	7.79075930927422e-09
ENSG00000108691	CCL2	0.0616167734573206	2.50576770976188e-11	7.79075930927422e-09
ENSG00000136315	RP11-84C10.2	0.062659503402562	2.5890116577394e-11	7.79075930927422e-09
ENSG00000168062	BATF2	0.065223296084317	2.57627089303747e-11	7.79075930927422e-09
ENSG00000269720	CTD-2521M24.5	0.0651759047285182	2.68722121118181e-11	7.93492847101806e-09
ENSG00000132530	XAF1	0.0639843017386196	2.804551892897e-11	8.1709684548923e-09
ENSG00000141580	WDR45L	-0.019529920495728	3.15805398239046e-11	9.07982073279131e-09
ENSG00000070756	PABPC1	-0.0225939322612033	3.25508807910663e-11	9.2372635865661e-09
ENSG00000008256	CYTH3	-0.0392073995740926	3.46981939403625e-11	9.72038763834436e-09
ENSG00000269640	CTD-2521M24.9	0.049528723143931	3.53417042644464e-11	9.77533645420782e-09
ENSG00000239819	IGKV1D-8	0.0601244068468867	3.62855353753376e-11	9.91094041858128e-09
ENSG00000248385	TARM1	0.0632010488815998	4.77808633014107e-11	1.28896252345571e-08
ENSG00000143545	RAB13	0.0587178777149428	5.25053467115043e-11	1.39913942804034e-08
ENSG00000124256	ZBP1	0.0603307172343734	5.86196202115096e-11	1.50693802499023e-08
ENSG00000167513	CDT1	0.0579143568258919	5.81877257425767e-11	1.50693802499023e-08
ENSG00000168899	VAMP5	0.048483614092898	5.80076802640971e-11	1.50693802499023e-08
ENSG00000130489	SCO2	0.0521592339671608	6.23225830252262e-11	1.56529972607381e-08
ENSG00000247317	RP11-273G15.2	0.0639465978803504	6.23116694128769e-11	1.56529972607381e-08
ENSG00000198417	MT1F	0.0404361716855818	6.40666118403109e-11	1.59081765377572e-08
ENSG00000135476	ESPL1	0.0577355123607941	6.54604088641423e-11	1.60716336414649e-08
ENSG00000089685	BIRC5	0.0627954662830346	7.01548529851685e-11	1.70079221438732e-08
ENSG00000196123	KIAA0895L	0.0403035424744951	7.08306674794041e-11	1.70079221438732e-08
ENSG00000158373	HIST1H2BD	0.0577635553782677	7.28776562219285e-11	1.71733880746529e-08
ENSG00000160883	HK3	0.0428707902959809	7.38775561309493e-11	1.71733880746529e-08
ENSG00000211896	IGHG1	0.0628588432484833	7.36059503367958e-11	1.71733880746529e-08
ENSG00000148834	GSTO1	0.0348558945221462	7.65530672039435e-11	1.7608011278667e-08
ENSG00000121380	BCL2L14	0.0634127315078964	8.25696074166655e-11	1.87940467881412e-08
ENSG00000196358	NTNG2	0.0594269662386581	8.7550870628084e-11	1.97224131349924e-08
ENSG00000088812	ATRN	-0.0297606154067314	9.35424349744093e-11	2.08570994553655e-08
ENSG00000095380	NANS	0.0282263932195072	1.1017651329548e-10	2.43178484042378e-08
ENSG00000124490	CRISP2	0.0584317699429279	1.15701628296257e-10	2.52819627990151e-08
ENSG00000130559	CAMSAP1	-0.024520072409252	1.28522294165326e-10	2.71955799898764e-08
ENSG00000164821	DEFA4	0.0605490142196535	1.30306734213299e-10	2.71955799898764e-08
ENSG00000211950	IGHV1-24	0.0617915023455311	1.29378682186935e-10	2.71955799898764e-08
ENSG00000225886	RP11-288L9.4	0.0606426475641039	1.3068216095085e-10	2.71955799898764e-08
ENSG00000258227	CLEC5A	0.0569946521429923	1.27609936984612e-10	2.71955799898764e-08
ENSG00000179044	EXOC3L1	0.0627246094969901	1.42021349950521e-10	2.92764954506494e-08
ENSG00000146670	CDCA5	0.0599694829358298	1.62071227180317e-10	3.30973680852066e-08
ENSG00000133106	EPSTI1	0.0624819749771989	1.6698032724787e-10	3.37841400990112e-08
ENSG00000211662	IGLV3-21	0.0623943003117797	1.71893126209467e-10	3.44590523009456e-08
ENSG00000087237	CETP	0.0509117796841279	1.78265196077085e-10	3.54115709043671e-08
ENSG00000197409	HIST1H3D	0.0577479230260198	1.83849237072007e-10	3.6191798912256e-08
ENSG00000138646	HERC5	0.0620995000530594	2.04027577750671e-10	3.97858681222972e-08
ENSG00000188761	BCL2L15	0.0588508864788649	2.05748162455704e-10	3.97858681222972e-08
ENSG00000196866	HIST1H2AD	0.0589301914109147	2.09939631353992e-10	4.02402709185621e-08
ENSG00000254503	CTD-2521M24.4	0.0546384505468691	2.16075939091066e-10	4.10563073485121e-08
ENSG00000122643	NT5C3	0.049582887988912	2.3644679153476e-10	4.24653282693492e-08
ENSG00000124469	CEACAM8	0.060521228928221	2.31457236836188e-10	4.24653282693492e-08
ENSG00000130303	BST2	0.049188104086508	2.33861347057127e-10	4.24653282693492e-08
ENSG00000137563	GGH	0.0545645742368195	2.34709099324918e-10	4.24653282693492e-08
ENSG00000157601	MX1	0.0619549304245462	2.25961859383983e-10	4.24653282693492e-08
ENSG00000185745	IFIT1	0.0606627111320034	2.28521595758517e-10	4.24653282693492e-08
ENSG00000211663	IGLV3-19	0.0618896479916371	2.37095329681049e-10	4.24653282693492e-08
ENSG00000002549	LAP3	0.0582803200767546	2.39326348185438e-10	4.25164230422766e-08
ENSG00000268310	AC087645.1	0.0616211339066634	2.45381681554552e-10	4.32406058358751e-08
ENSG00000138772	ANXA3	0.0598375988807876	2.50478852361546e-10	4.37857072236172e-08
ENSG00000213492	AC092661.2	0.0509765526001645	2.76798890468578e-10	4.8002639330388e-08
ENSG00000137804	NUSAP1	0.0504487072863489	3.0177550364364e-10	5.15517995131326e-08
ENSG00000163666	HESX1	0.0589667997630983	3.01982991061323e-10	5.15517995131326e-08
ENSG00000188282	RUFY4	0.0560638435506896	3.45216217059293e-10	5.84753454183148e-08
ENSG00000119917	IFIT3	0.061230409289156	3.74442757839107e-10	6.27483615202085e-08
ENSG00000170312	CDK1	0.0611093956158352	3.7618577452507e-10	6.27483615202085e-08
ENSG00000108679	LGALS3BP	0.0557766815808559	3.80612240691237e-10	6.3005742964729e-08
ENSG00000211673	IGLV3-1	0.0610423162422189	4.29580654324092e-10	7.05771945686897e-08
ENSG00000164045	CDC25A	0.060891394627531	4.55700848269982e-10	7.43098450413984e-08
ENSG00000146425	DYNLT1	0.041283346453035	4.71134782598851e-10	7.53155118756667e-08
ENSG00000153823	PID1	-0.0539089293595796	4.66981752685954e-10	7.53155118756667e-08
ENSG00000224940	PRRT4	0.0608983917702939	4.72208371560402e-10	7.53155118756667e-08
ENSG00000142583	SLC2A5	0.0592180949009682	5.09394861939908e-10	8.06578777409342e-08
ENSG00000178685	PARP10	0.0492811981752772	5.17169286292712e-10	8.12997559336839e-08
ENSG00000004468	CD38	0.0541601381000715	5.334419941144e-10	8.31845681048494e-08
ENSG00000010030	ETV7	0.060673154222523	5.51398124384011e-10	8.31845681048494e-08
ENSG00000112053	SLC26A8	0.0561846709881516	5.38402597022017e-10	8.31845681048494e-08
ENSG00000135114	OASL	0.0606593944658797	5.53764822242411e-10	8.31845681048494e-08
ENSG00000165480	SKA3	0.0606447880090302	5.52754078234435e-10	8.31845681048494e-08
ENSG00000169245	CXCL10	0.0599165894950577	5.49102187557732e-10	8.31845681048494e-08
ENSG00000177409	SAMD9L	0.0556293264541841	5.55807374642259e-10	8.31845681048494e-08
ENSG00000089127	OAS1	0.0605461799595027	5.86912581527475e-10	8.49313034368004e-08
ENSG00000109805	NCAPG	0.0507332369504806	5.83155133300827e-10	8.49313034368004e-08
ENSG00000175970	UNC119B	-0.020663220481641	5.73275255836215e-10	8.49313034368004e-08
ENSG00000178999	AURKB	0.0518077175324068	5.83748008387483e-10	8.49313034368004e-08
ENSG00000212907	MT-ND4L	-0.0412407237707047	5.82033657249393e-10	8.49313034368004e-08
ENSG00000134716	CYP2J2	0.0592274268531363	6.60834240667572e-10	9.48540436573688e-08
ENSG00000140464	PML	0.0516599241703237	6.64164966343757e-10	9.48540436573688e-08
ENSG00000165185	KIAA1958	0.0545638447222864	7.36904790731227e-10	1.03930950453363e-07
ENSG00000253755	IGHGP	0.0578087518944917	7.37233871231119e-10	1.03930950453363e-07
ENSG00000267538	AC004799.3	0.0592344168198374	7.4458750698829e-10	1.04294753943597e-07
ENSG00000122420	PTGFR	0.056134240888137	8.25730628311827e-10	1.14923821396444e-07
ENSG00000142089	IFITM3	0.0598429289355205	8.37545499157472e-10	1.15101928943962e-07
ENSG00000197561	ELANE	0.0585005338408331	8.35330707016853e-10	1.15101928943962e-07
ENSG00000118520	ARG1	0.0598802830796937	8.52860792565816e-10	1.16474132364723e-07
ENSG00000185880	TRIM69	0.0370554820330691	8.60780501193803e-10	1.16825557339042e-07
ENSG00000138496	PARP9	0.0524147063037888	8.77135189172312e-10	1.18310376658051e-07
ENSG00000171658	RP11-443P15.2	0.0597685813756318	9.24189670344099e-10	1.23892444703613e-07
ENSG00000170873	MTSS1	-0.0341000195972689	9.38291635300336e-10	1.25015917822852e-07
ENSG00000188636	LDOC1L	-0.0326378651272956	9.51994230562135e-10	1.26072884436444e-07
ENSG00000172232	AZU1	0.0592562650827132	9.8434689777436e-10	1.28796191995614e-07
ENSG00000225630	MTND2P28	-0.0584731802394364	9.79874797591239e-10	1.28796191995614e-07
ENSG00000188313	PLSCR1	0.0562752238980352	9.91676225983971e-10	1.28982840559379e-07
ENSG00000122952	ZWINT	0.0540265904291776	1.03363302146297e-09	1.32081375157821e-07
ENSG00000127564	PKMYT1	0.0435710679599949	1.03230555410337e-09	1.32081375157821e-07
ENSG00000138642	HERC6	0.0558197613525896	1.02157636418619e-09	1.32081375157821e-07
ENSG00000146955	RAB19	0.0516757402517876	1.11984666662893e-09	1.42266101816911e-07
ENSG00000010610	CD4	-0.0403951626694699	1.12847291217156e-09	1.42533304068559e-07
ENSG00000163221	S100A12	0.0569368928514381	1.18836246740652e-09	1.49235105030459e-07
ENSG00000132274	TRIM22	0.0531763369078063	1.20348817398326e-09	1.5027097194119e-07
ENSG00000170145	SIK2	-0.0208078843243913	1.23396131221046e-09	1.5320050359722e-07
ENSG00000152102	FAM168B	-0.0218209329248328	1.27492333242536e-09	1.57391806422749e-07
ENSG00000124942	AHNAK	-0.0379522463895001	1.28318745651272e-09	1.57522073664378e-07
ENSG00000135424	ITGA7	0.0485651795818141	1.40148142043857e-09	1.71082516860353e-07
ENSG00000100448	CTSG	0.0574190787153097	1.42231713818396e-09	1.72661398813654e-07
ENSG00000108984	MAP2K6	0.0446964080530731	1.50448105350845e-09	1.81626604973553e-07
ENSG00000116691	MIIP	0.0286188925900162	1.55489924448329e-09	1.8668188676486e-07
ENSG00000258311	RP11-644F5.10	0.0282702693669467	1.57399940724009e-09	1.87942410096193e-07
ENSG00000175518	UBQLNL	0.0561185494368549	1.67660489311083e-09	1.99105943040026e-07
ENSG00000132963	POMP	0.0328297860062381	1.81114457441329e-09	2.1392064916489e-07
ENSG00000164091	WDR82	-0.0212918245492224	1.86853705451089e-09	2.19512920312459e-07
ENSG00000088827	SIGLEC1	0.0564561890055978	1.9018838918186e-09	2.22235641284108e-07
ENSG00000198786	MT-ND5	-0.0461119539556953	1.95310418692985e-09	2.27006806322362e-07
ENSG00000108771	DHX58	0.0537499269469549	1.99784281203653e-09	2.30978112623334e-07
ENSG00000123610	TNFAIP6	0.056781852352296	2.06174223352833e-09	2.37111208130672e-07
ENSG00000235192	AC009495.2	0.0482132106854894	2.07554782130583e-09	2.37449190802898e-07
ENSG00000135441	BLOC1S1	0.0326615184447863	2.0942605976066e-09	2.38342126657821e-07
ENSG00000121858	TNFSF10	0.0473885339149934	2.11760563380916e-09	2.38514436620433e-07
ENSG00000244116	IGKV2-28	0.0461349372964535	2.10689807157789e-09	2.38514436620433e-07
ENSG00000101425	BPI	0.0581491802164723	2.21399231093566e-09	2.48092030698744e-07
ENSG00000138160	KIF11	0.0511570431900207	2.25837048485815e-09	2.51773742166507e-07
ENSG00000119915	ELOVL3	0.0550969577632676	2.40858864436333e-09	2.67157718111589e-07
ENSG00000211951	IGHV2-26	0.0574985704267598	2.46289891579347e-09	2.71802041459612e-07
ENSG00000224891	AC007899.3	0.0577488843932259	2.56736506673693e-09	2.8190700539331e-07
ENSG00000269053	CTD-2521M24.8	0.0492275924483094	2.5894499183799e-09	2.82910350832596e-07
ENSG00000211659	IGLV3-25	0.0582169968276927	2.65752850695427e-09	2.88903758236108e-07
ENSG00000239887	C1orf226	0.0573053174805632	2.69794867477805e-09	2.9184592323057e-07
ENSG00000170801	HTRA3	0.0548753510814093	2.71984905098118e-09	2.92765623709309e-07
ENSG00000086548	CEACAM6	0.0563511604552403	2.87559405292922e-09	3.08012772796845e-07
ENSG00000166619	BLCAP	-0.0115299563527319	3.04831978339578e-09	3.23591198293404e-07
ENSG00000203583	AL021707.1	0.037931744557128	3.05065154219218e-09	3.23591198293404e-07
ENSG00000160932	LY6E	0.0578788917450855	3.12819822639792e-09	3.28626247331831e-07
ENSG00000175063	UBE2C	0.0482632214621685	3.12631592601484e-09	3.28626247331831e-07
ENSG00000169679	BUB1	0.0551146244850012	3.15140401931559e-09	3.29480044143851e-07
ENSG00000157554	ERG	0.0574277272778052	3.17224645703266e-09	3.30079796822003e-07
ENSG00000055332	EIF2AK2	0.0552748955535557	3.27440464564962e-09	3.39094862142606e-07
ENSG00000211892	IGHG4	0.0544156831379353	3.32566552489578e-09	3.42778855587254e-07
ENSG00000107201	DDX58	0.0532897004073436	3.37866309807969e-09	3.46606419512392e-07
ENSG00000149131	SERPING1	0.057752899464909	3.44512959019561e-09	3.51704143754539e-07
ENSG00000225964	AC017076.5	0.0569885616058503	3.46054601195487e-09	3.51704143754539e-07
ENSG00000211973	IGHV1-69	0.0576200876489637	3.47720617096591e-09	3.51761259452667e-07
ENSG00000008438	PGLYRP1	0.0540738743172669	3.53071214704074e-09	3.53897206995354e-07
ENSG00000059378	PARP12	0.0506161301854184	3.53059095550307e-09	3.53897206995354e-07
ENSG00000158882	TOMM40L	0.0250715652620561	3.56475647135101e-09	3.55678053221419e-07
ENSG00000137628	DDX60	0.0563734089663235	3.7273392515214e-09	3.68534343823503e-07
ENSG00000229023	AC067945.3	0.055365939875086	3.71574068240252e-09	3.68534343823503e-07
ENSG00000134321	RSAD2	0.0543674605750323	3.79092272964484e-09	3.73132669213826e-07
ENSG00000158481	CD1C	-0.0461379887601789	3.94386482524145e-09	3.86445696396192e-07
ENSG00000167900	TK1	0.0499880421642405	4.1439419110409e-09	4.02441220880688e-07
ENSG00000176890	TYMS	0.0534240032209305	4.13062724962955e-09	4.02441220880688e-07
ENSG00000124688	MAD2L1BP	0.0299630776782205	4.80330425527546e-09	4.64411510097452e-07
ENSG00000100342	APOL1	0.0459341885907187	4.87161977620601e-09	4.68941690439989e-07
ENSG00000228318	AP001610.5	0.0570145129638427	4.95516296814022e-09	4.74891517617684e-07
ENSG00000065618	COL17A1	0.0566116258083244	4.99203003647894e-09	4.76335582214416e-07
ENSG00000242076	IGKV1-33	0.0489644627971453	5.24484161800613e-09	4.98282757369791e-07
ENSG00000179862	CITED4	0.0469248485886516	5.30462652671534e-09	5.01780927425355e-07
ENSG00000131153	GINS2	0.0526392516576026	5.35627069528694e-09	5.04482202425495e-07
ENSG00000070404	FSTL3	0.0456769575647748	5.38211053335561e-09	5.04740331606667e-07
ENSG00000143257	NR1I3	0.0339992874086579	5.4627134167364e-09	5.10110046449175e-07
ENSG00000048471	SNX29	-0.0306420460479947	5.74142030044153e-09	5.31592266885372e-07
ENSG00000117228	GBP1	0.0541804157581815	5.73278612961819e-09	5.31592266885372e-07
ENSG00000172426	RSPH9	0.0318167874203599	6.23684766492087e-09	5.75026828380531e-07
ENSG00000112312	GMNN	0.0475674223441509	6.32120143946008e-09	5.80355347284211e-07
ENSG00000012223	LTF	0.0557196246280233	6.46378502554286e-09	5.89243430964885e-07
ENSG00000197301	RP11-366L20.2	0.0566910146075398	6.4719428598953e-09	5.89243430964885e-07
ENSG00000173193	PARP14	0.0515000867076992	6.54155568704141e-09	5.93110096753286e-07
ENSG00000113763	UNC5A	0.0478086195164609	6.57930521292494e-09	5.94067761188524e-07
ENSG00000123609	NMI	0.0409649190422188	6.61490404071751e-09	5.94824148945343e-07
ENSG00000169607	CKAP2L	0.0553387968161511	6.65244329279962e-09	5.95748108159691e-07
ENSG00000203760	CENPW	0.0536001673576887	6.7111333682419e-09	5.98550919303893e-07
ENSG00000064270	ATP2C2	0.0545588328485151	6.89338109284461e-09	6.12305976665641e-07
ENSG00000101057	MYBL2	0.0555191407310596	7.08680790136966e-09	6.26938621266512e-07
ENSG00000118162	KPTN	0.042738907258387	7.24086836629636e-09	6.31251935082846e-07
ENSG00000149516	MS4A3	0.0562986949979002	7.18628975604514e-09	6.31251935082846e-07
ENSG00000211685	IGLC7	0.0555214491180953	7.25112057598254e-09	6.31251935082846e-07
ENSG00000233392	AC104809.4	-0.0560884370624003	7.19940198291933e-09	6.31251935082846e-07
ENSG00000137806	NDUFAF1	0.0229500035662439	7.31952973160072e-09	6.34678746687331e-07
ENSG00000130487	KLHDC7B	0.0538608297878688	7.47222453943659e-09	6.45358017435687e-07
ENSG00000082014	SMARCD3	0.0356055282894175	7.59795752071767e-09	6.53633739311818e-07
ENSG00000145386	CCNA2	0.04961856485184	7.69939106549343e-09	6.59762330086655e-07
ENSG00000150337	FCGR1A	0.0548728016044246	7.98772062336962e-09	6.81795638051756e-07
ENSG00000136147	PHF11	0.0375985545733053	8.10294311445621e-09	6.88939338497987e-07
ENSG00000168078	PBK	0.0537038621734725	8.49647444303173e-09	7.19598694010412e-07
ENSG00000240382	IGKV1-17	0.0553617703759782	8.54574553035024e-09	7.20977164415765e-07
ENSG00000211639	IGLV4-60	0.0536163403856011	8.9573247857692e-09	7.5279424574555e-07
ENSG00000115267	IFIH1	0.0512609211116032	9.00552400786668e-09	7.53945230252471e-07
ENSG00000102837	OLFM4	0.0520490077794076	9.38036643469037e-09	7.82329721238241e-07
ENSG00000124107	SLPI	0.0554386562651229	9.43141875163604e-09	7.83596696357411e-07
ENSG00000101608	MYL12A	0.0251565576103036	9.47639388356317e-09	7.84351071021738e-07
ENSG00000211670	IGLV3-9	0.0560431820088448	9.53301772630563e-09	7.86060265424545e-07
ENSG00000155363	MOV10	0.0448343065919649	1.0111988074278e-08	8.28560452052283e-07
ENSG00000204791	CTD-3065J16.6	0.0530049118991936	1.01242799275987e-08	8.28560452052283e-07
ENSG00000163686	ABHD6	-0.0261120260679654	1.0401672179082e-08	8.48085592481794e-07
ENSG00000198886	MT-ND4	-0.0365913721381248	1.06794488526408e-08	8.67496791371947e-07
ENSG00000123485	HJURP	0.0549741583357259	1.08244520330254e-08	8.76018893976439e-07
ENSG00000197272	IL27	0.0489414639777815	1.10299795325191e-08	8.89358238985517e-07
ENSG00000005381	MPO	0.0558215324553894	1.14553566997117e-08	9.20261026637501e-07
ENSG00000189157	FAM47E	0.0477661095007181	1.23640080054529e-08	9.89618823908978e-07
ENSG00000255642	RP11-415I12.6	-0.0316894997494869	1.266814628596e-08	1.01026154925004e-06
ENSG00000138180	CEP55	0.0554651000769384	1.27847742879357e-08	1.01585491987521e-06
ENSG00000051180	RAD51	0.0515656643736995	1.30318751990651e-08	1.03173733686511e-06
ENSG00000100095	SEZ6L	-0.0518582111242936	1.34756011753039e-08	1.06301574469879e-06
ENSG00000123689	G0S2	0.0509394702198345	1.39447236371452e-08	1.09606531005489e-06
ENSG00000075218	GTSE1	0.0517914419174487	1.43614898147269e-08	1.12477746932472e-06
ENSG00000101182	PSMA7	0.0173811392879358	1.4515876178212e-08	1.13280860846468e-06
ENSG00000111331	OAS3	0.0548408970379681	1.52667425538908e-08	1.18600494337091e-06
ENSG00000152022	LIX1L	-0.0203913521311561	1.53060909812181e-08	1.18600494337091e-06
ENSG00000132432	SEC61G	0.0306106249142222	1.5499737630521e-08	1.19676596100535e-06
ENSG00000152778	IFIT5	0.0531983329216613	1.58389912875509e-08	1.21865422050801e-06
ENSG00000111206	FOXM1	0.0387890278102256	1.59729258054183e-08	1.2246470237691e-06
ENSG00000134333	LDHA	0.0251052152065572	1.66904980812906e-08	1.27518906844155e-06
ENSG00000134326	CMPK2	0.0544359290447153	1.68319823864308e-08	1.28151793423658e-06
ENSG00000101665	SMAD7	-0.0297240983431942	1.72243917427398e-08	1.30684091656461e-06
ENSG00000142945	KIF2C	0.0515983849636774	1.7300804331068e-08	1.30809645480335e-06
ENSG00000260336	RP11-395B7.7	0.0318316839294706	1.7436631158212e-08	1.31382009461411e-06
ENSG00000213500	LAP3P2	0.0536122210295934	1.92415128225579e-08	1.4448326346588e-06
ENSG00000226321	AC104809.3	-0.0544702056420558	2.01335072087734e-08	1.50663447266749e-06
ENSG00000118804	STBD1	0.0464727210505843	2.04677940001017e-08	1.5264224119325e-06
ENSG00000225470	JPX	0.0357697562335554	2.16299243030409e-08	1.60760365967941e-06
ENSG00000211945	IGHV1-18	0.0546888011761445	2.2161578627235e-08	1.64153442231767e-06
ENSG00000125995	ROMO1	0.032767595558536	2.42845644653249e-08	1.77472246866828e-06
ENSG00000151208	DLG5	-0.0457095306630568	2.42369326125499e-08	1.77472246866828e-06
ENSG00000154217	PITPNC1	-0.0212109227602163	2.4185563813247e-08	1.77472246866828e-06
ENSG00000211669	IGLV3-10	0.053899260329872	2.4069707478332e-08	1.77472246866828e-06
ENSG00000183856	IQGAP3	0.0542503864971617	2.44086791093266e-08	1.77784682405965e-06
ENSG00000259162	RP11-203M5.6	-0.0546743169874203	2.47990934135557e-08	1.80028235940069e-06
ENSG00000198888	MT-ND1	-0.0357152316513059	2.5017410823577e-08	1.80901455887378e-06
ENSG00000237649	KIFC1	0.0506336223093526	2.50849577291087e-08	1.80901455887378e-06
ENSG00000023171	GRAMD1B	0.0426941728622546	2.54833894592038e-08	1.83170244431928e-06
ENSG00000075399	VPS9D1	0.0373530815535041	2.71432776588786e-08	1.93826065400051e-06
ENSG00000238025	ZDHHC4P1	0.0516650837632379	2.7138525468382e-08	1.93826065400051e-06
ENSG00000188987	HIST1H4D	0.0536325099191686	2.74040579460878e-08	1.94695288409139e-06
ENSG00000211651	IGLV1-44	0.0542229932707994	2.74432057251452e-08	1.94695288409139e-06
ENSG00000179750	APOBEC3B	0.0543112739476145	2.76932411138789e-08	1.95833337080701e-06
ENSG00000225485	ARHGAP23	0.0493103447471117	2.79902961991965e-08	1.9729547169311e-06
ENSG00000244575	IGKV1-27	0.0542893129568152	2.81299932160655e-08	1.97642598638021e-06
ENSG00000168701	TMEM208	0.0243771490046276	2.8425956576879e-08	1.99081915756854e-06
ENSG00000171241	SHCBP1	0.0490577495332811	2.93008845341456e-08	2.04553874746203e-06
ENSG00000198804	MT-CO1	-0.0371368393308283	2.95672223619362e-08	2.05755852175372e-06
ENSG00000150712	MTMR12	-0.023289894263336	2.990892007435e-08	2.07472956363372e-06
ENSG00000138035	PNPT1	0.0441578486578558	3.03413635379094e-08	2.09680227937533e-06
ENSG00000222041	LINC00152	0.0389206427075814	3.05149935857102e-08	2.09680227937533e-06
ENSG00000234964	FABP5P7	0.0515513138901927	3.04557190718868e-08	2.09680227937533e-06
ENSG00000162614	NEXN	0.0471134927231598	3.27295008626402e-08	2.24191950893276e-06
ENSG00000042493	CAPG	0.0341992927797369	3.31150354495239e-08	2.26123949877358e-06
ENSG00000165304	MELK	0.0539901662321306	3.34374238087325e-08	2.27614064686796e-06
ENSG00000241351	IGKV3-11	0.0538260793763041	3.35450317172367e-08	2.27637418650105e-06
ENSG00000154839	SKA1	0.0529507834894608	3.41470760195607e-08	2.31005497864836e-06
ENSG00000101412	E2F1	0.0421004880114415	3.42577995152829e-08	2.3103925222483e-06
ENSG00000104043	ATP8B4	0.0459258560007153	3.46389721561604e-08	2.32891132487465e-06
ENSG00000161888	SPC24	0.0515098757569841	3.48349583729989e-08	2.33018308406056e-06
ENSG00000183473	SSTR3	0.0430651159858662	3.48711669254406e-08	2.33018308406056e-06
ENSG00000120217	CD274	0.0511790614573929	3.59954054021402e-08	2.39797440073831e-06
ENSG00000181458	TMEM45A	0.0504347263402716	3.63297245703228e-08	2.41289000482105e-06
ENSG00000175550	DRAP1	0.0365337240400363	3.68327099134573e-08	2.4388834676332e-06
ENSG00000198879	SFMBT2	-0.0304871963230225	3.72457934864429e-08	2.45878499538448e-06
ENSG00000243466	IGKV1-5	0.053740131171355	3.87460254108925e-08	2.55011867847414e-06
ENSG00000070371	CLTCL1	0.0448410651182966	3.89249502410222e-08	2.55420146461434e-06
ENSG00000157456	CCNB2	0.0532659857653849	3.90634166955574e-08	2.5556129287863e-06
ENSG00000188157	AGRN	0.0531972755043758	3.94142069921276e-08	2.57086518502979e-06
ENSG00000101003	GINS1	0.0496173835539312	4.13274852054676e-08	2.687639521502e-06
ENSG00000123131	PRDX4	0.0390020367157215	4.211823126558e-08	2.72812044075105e-06
ENSG00000179981	TSHZ1	-0.0301468718364276	4.22968006172245e-08	2.72812044075105e-06
ENSG00000196116	TDRD7	0.0420229381405247	4.23245082337013e-08	2.72812044075105e-06
ENSG00000170581	STAT2	0.0445312875685481	4.38253612421953e-08	2.81655284853885e-06
ENSG00000198019	FCGR1B	0.0495408930885002	4.4216292202873e-08	2.83334369772721e-06
ENSG00000213719	CLIC1	0.0317803045593709	4.53255621240536e-08	2.89593233325349e-06
ENSG00000197063	MAFG	0.0327369412155091	4.70436315564608e-08	2.99693992169162e-06
ENSG00000106785	TRIM14	0.0326757126354858	5.01371426473279e-08	3.17549769271525e-06
ENSG00000143546	S100A8	0.0526640168379023	5.00140880274303e-08	3.17549769271525e-06
ENSG00000100162	CENPM	0.0510070247135466	5.22196887181473e-08	3.29783935890242e-06
ENSG00000211968	IGHV1-58	0.0514563129667537	5.26933272050221e-08	3.31816107422748e-06
ENSG00000088325	TPX2	0.0505539293935326	5.5810823253082e-08	3.49796583282848e-06
ENSG00000107863	ARHGAP21	-0.0310832950785686	5.58688424171498e-08	3.49796583282848e-06
ENSG00000130699	TAF4	-0.0254966188549223	5.79147257884513e-08	3.61569906629557e-06
ENSG00000163568	AIM2	0.0476941709729464	5.95521605368194e-08	3.7073340737608e-06
ENSG00000111335	OAS2	0.0527516746021024	6.03171056756789e-08	3.74428714806608e-06
ENSG00000143228	NUF2	0.0528684549981387	6.07995884673548e-08	3.76354619716762e-06
ENSG00000177989	ODF3B	0.0460707954443333	6.17070888501781e-08	3.80893106911085e-06
ENSG00000074842	C19orf10	0.0293386503687221	6.56613242177528e-08	4.04159322671019e-06
ENSG00000239839	DEFA3	0.0494768637624024	6.65289313307538e-08	4.0834934789559e-06
ENSG00000143891	GALM	0.0423100352336591	6.92060281779666e-08	4.22408078691829e-06
ENSG00000164611	PTTG1	0.0453039907596583	6.91914298171521e-08	4.22408078691829e-06
ENSG00000198727	MT-CYB	-0.036973046230139	7.10949249893453e-08	4.32728469621778e-06
ENSG00000132646	PCNA	0.0315324443736937	7.31958969784227e-08	4.44278762465421e-06
ENSG00000133226	SRRM1	-0.0179348428230144	7.46843388675439e-08	4.52057476065014e-06
ENSG00000139618	BRCA2	0.0436464414437038	7.79589084249768e-08	4.70574615468002e-06
ENSG00000261655	CTD-3064M3.3	-0.0517522650377758	7.90832502952886e-08	4.76046309146653e-06
ENSG00000204220	PFDN6	0.0192024603650567	7.94563158997151e-08	4.76978010638647e-06
ENSG00000165948	IFI27L1	0.0423210174017308	8.14003814753534e-08	4.87309516607657e-06
ENSG00000115457	IGFBP2	0.0521035802048093	8.18210124800037e-08	4.88330838162509e-06
ENSG00000239961	LILRA4	-0.0480003547059871	8.20179477395271e-08	4.88330838162509e-06
ENSG00000156587	UBE2L6	0.0449476002713434	8.29961752722162e-08	4.92812343987281e-06
ENSG00000159658	KIAA0494	-0.0167194532332786	8.39520282939466e-08	4.97137065108679e-06
ENSG00000181381	DDX60L	0.0474375587727624	8.42128690384906e-08	4.97333892259475e-06
ENSG00000143420	ENSA	0.0163776176779833	8.56243383233849e-08	5.04306581321909e-06
ENSG00000119632	IFI27L2	0.0354960937023165	8.66472010602464e-08	5.0895913719555e-06
ENSG00000136011	STAB2	0.0521986321966568	8.75239481381423e-08	5.11359837103355e-06
ENSG00000152229	PSTPIP2	0.0429711082857234	8.7341384470387e-08	5.11359837103355e-06
ENSG00000136689	IL1RN	0.0457066156011787	8.80731687926478e-08	5.13196483010173e-06
ENSG00000148600	CDHR1	-0.0479200817416487	8.91643607377174e-08	5.1817299108507e-06
ENSG00000170175	CHRNB1	0.0239066382223059	9.17007751092714e-08	5.31499638438379e-06
ENSG00000130803	ZNF317	-0.0165007682561319	9.3633020105786e-08	5.41263259876066e-06
ENSG00000233785	RP13-314C10.5	0.0501104860906511	9.506072988686e-08	5.48066493075931e-06
ENSG00000100911	PSME2	0.0318306010330175	9.60945525830035e-08	5.51243295838458e-06
ENSG00000171320	ESCO2	0.051670043303916	9.6116285622833e-08	5.51243295838458e-06
ENSG00000160180	TFF3	0.0520719541506127	9.73601347851526e-08	5.55461176289914e-06
ENSG00000211653	IGLV1-40	0.0521216836824394	9.73495364084048e-08	5.55461176289914e-06
ENSG00000177685	EFCAB4A	0.0417188090445495	9.91969462896248e-08	5.644667899413e-06
ENSG00000152253	SPC25	0.0493496952098796	1.01537929597609e-07	5.76287090814895e-06
ENSG00000136930	PSMB7	0.0155084427063734	1.01910155772149e-07	5.76901247092545e-06
ENSG00000172965	AC068491.1	0.036962886712202	1.04843030780428e-07	5.91970301184275e-06
ENSG00000178127	NDUFV2	0.0235869370403859	1.07307624021659e-07	6.04324456829194e-06
ENSG00000239672	NME1	0.0401256654159366	1.07663569623056e-07	6.04770349571565e-06
ENSG00000118515	SGK1	-0.0362370287358166	1.08064499090929e-07	6.05465992214332e-06
ENSG00000038382	TRIO	-0.028102466402928	1.08756413415967e-07	6.0778424285225e-06
ENSG00000187116	LILRA5	0.0414630973267363	1.09490750242169e-07	6.08774143394818e-06
ENSG00000258920	FOXN3-AS1	0.0386517208398989	1.09378439298558e-07	6.08774143394818e-06
ENSG00000143771	CNIH4	0.0308249374494959	1.10144922363928e-07	6.09310556601062e-06
ENSG00000143889	HNRPLL	0.0300673952431367	1.10101638321962e-07	6.09310556601062e-06
ENSG00000086065	CHMP5	0.0476142253440265	1.12478182153992e-07	6.20646656122952e-06
ENSG00000163754	GYG1	0.035758354081382	1.15486867107864e-07	6.35128492153411e-06
ENSG00000180879	SSR4	0.0252910943924678	1.15684014405317e-07	6.35128492153411e-06
ENSG00000124203	ZNF831	-0.0312655842472628	1.20508194774823e-07	6.59956031083873e-06
ENSG00000156127	BATF	0.031965853616605	1.21572947173499e-07	6.6412261717203e-06
ENSG00000211947	IGHV3-21	0.0517150448179076	1.23677048692823e-07	6.73931967827154e-06
ENSG00000214110	LDHAP4	0.031527058066272	1.24595845375765e-07	6.7556918543569e-06
ENSG00000236882	C5orf27	0.0516295910876293	1.24286829941773e-07	6.7556918543569e-06
ENSG00000180992	MRPL14	0.0293846320695377	1.2549014843447e-07	6.77919384853411e-06
ENSG00000213253	CTC-250I14.1	0.051461838076861	1.25649787591246e-07	6.77919384853411e-06
ENSG00000084628	NKAIN1	0.0267534294452509	1.2669343951052e-07	6.81866587868069e-06
ENSG00000171101	SIGLEC17P	-0.0457736523429233	1.29154817839954e-07	6.93405878285219e-06
ENSG00000112343	TRIM38	0.0311026438883257	1.31555246680037e-07	7.02839534280068e-06
ENSG00000255221	CARD17	0.051568218350197	1.31474512317602e-07	7.02839534280068e-06
ENSG00000267387	CTD-2240E14.4	0.038036545771754	1.33062968870275e-07	7.09160715313265e-06
ENSG00000231233	RP11-127L20.6	0.0484487210829605	1.34922958860137e-07	7.17323983954464e-06
ENSG00000265257	RP11-21J18.1	0.0243239630731577	1.35703344189817e-07	7.19721789779538e-06
ENSG00000139970	RTN1	-0.0436290975845673	1.37957669532581e-07	7.29906304347801e-06
ENSG00000146072	TNFRSF21	-0.0475454613622378	1.38332667390858e-07	7.30122491583971e-06
ENSG00000021355	SERPINB1	0.0323319372770884	1.39543789414649e-07	7.34740082529998e-06
ENSG00000100811	YY1	-0.0141441143793514	1.40468643377633e-07	7.37831809241506e-06
ENSG00000169991	IFFO2	-0.028392353098844	1.4128967774608e-07	7.40364687872803e-06
ENSG00000213079	SCAF8	-0.0217354299640571	1.46624488340065e-07	7.66481266679129e-06
ENSG00000211935	IGHV1-3	0.049982820558887	1.48709832761776e-07	7.7552710159369e-06
ENSG00000184709	LRRC26	-0.05115521367807	1.52507197605511e-07	7.93436851161433e-06
ENSG00000210194	J01415.20	-0.0468553536253932	1.53501232042613e-07	7.96711501511432e-06
ENSG00000113368	LMNB1	0.037003311305502	1.55866405163149e-07	8.05420840757933e-06
ENSG00000155287	SLC25A28	0.0210591374691065	1.55916441188323e-07	8.05420840757933e-06
ENSG00000263276	RP11-96D1.10	-0.0256677779479325	1.57668148689156e-07	8.12548754011027e-06
ENSG00000198899	MT-ATP6	-0.0327478143713881	1.58674464104401e-07	8.15810756504769e-06
ENSG00000182578	CSF1R	-0.0399854622519752	1.61515166677523e-07	8.28466644852245e-06
ENSG00000110492	MDK	0.0443209304709861	1.62748457829884e-07	8.32837600009551e-06
ENSG00000102057	KCND1	0.0401816423669627	1.64952290170219e-07	8.40718715979912e-06
ENSG00000183011	LSMD1	0.0277815821129601	1.6505804272362e-07	8.40718715979912e-06
ENSG00000142961	MOB3C	0.0303546616852756	1.69561213323551e-07	8.61646993565795e-06
ENSG00000183010	PYCR1	0.0495026787790436	1.7717434922962e-07	8.98245175177825e-06
ENSG00000198518	HIST1H4E	0.0459273054713022	1.83539700271932e-07	9.28362497833793e-06
ENSG00000130813	C19orf66	0.0355375982915693	1.9163844898212e-07	9.67088163673972e-06
ENSG00000184357	HIST1H1B	0.0445102135782692	1.94282818552877e-07	9.78173702349979e-06
ENSG00000168792	ABHD15	-0.0244908758703338	1.96478538702421e-07	9.86954609008416e-06
ENSG00000011426	ANLN	0.0507932058233695	1.97842235022346e-07	9.90624410384264e-06
ENSG00000223991	AC104809.2	-0.0509772801764691	1.98115814991499e-07	9.90624410384264e-06
ENSG00000123130	ACOT9	0.0342076229474993	2.01208602166643e-07	9.96963529692363e-06
ENSG00000128228	SDF2L1	0.0309005397059086	2.0100757781481e-07	9.96963529692363e-06
ENSG00000132780	NASP	0.0189376310172726	2.00478171474261e-07	9.96963529692363e-06
ENSG00000213347	MXD3	0.0289074761762042	2.00442635728707e-07	9.96963529692363e-06
ENSG00000085999	RAD54L	0.0468909774288626	2.0169695709976e-07	9.97122219363543e-06
ENSG00000038210	PI4K2B	0.0318725311539313	2.03970449696717e-07	1.00608539420383e-05
ENSG00000130589	HELZ2	0.047330353322689	2.06298856360162e-07	1.01372364406956e-05
ENSG00000158887	MPZ	0.0310862894112324	2.06446854428151e-07	1.01372364406956e-05
ENSG00000112742	TTK	0.0507617857224066	2.08764680522085e-07	1.0222821849214e-05
ENSG00000238000	RP11-274E7.2	0.0364646965805936	2.09125503024971e-07	1.0222821849214e-05
ENSG00000166428	PLD4	-0.0441544253421152	2.10004097333805e-07	1.02428560956271e-05
ENSG00000128272	ATF4	0.0180169692106047	2.21522047791012e-07	1.07766815676995e-05
ENSG00000198695	MT-ND6	-0.0398006539015299	2.21935229759039e-07	1.07766815676995e-05
ENSG00000099860	GADD45B	0.0326172391036568	2.24220735361863e-07	1.08396025678828e-05
ENSG00000250011	HMGB1P3	0.0389707463962188	2.24223164188504e-07	1.08396025678828e-05
ENSG00000197632	SERPINB2	0.0442698234362187	2.31232212740834e-07	1.11537639748343e-05
ENSG00000175264	CHST1	0.0457133568316577	2.337827139197e-07	1.12272221579327e-05
ENSG00000211640	IGLV6-57	0.0504537583430254	2.33543495307711e-07	1.12272221579327e-05
ENSG00000051341	POLQ	0.0494964766217744	2.38478699252254e-07	1.14276273187741e-05
ENSG00000123080	CDKN2C	0.0352213792411724	2.39227749467541e-07	1.14384366599896e-05
ENSG00000163820	FYCO1	-0.0208440570980485	2.39966046392459e-07	1.14486857635843e-05
ENSG00000124766	SOX4	-0.0317726081587417	2.45071992155396e-07	1.16633555643746e-05
ENSG00000183696	UPP1	0.0280696278175773	2.45533090458667e-07	1.16633555643746e-05
ENSG00000143106	PSMA5	0.0208661541595232	2.48284343743167e-07	1.17684624623253e-05
ENSG00000203666	EFCAB2	0.0387071488402092	2.50753180417691e-07	1.1859757024474e-05
ENSG00000251039	IGKV2D-40	0.0482805762261898	2.52208061517209e-07	1.19028042164418e-05
ENSG00000184661	CDCA2	0.0501808865848498	2.57277601958148e-07	1.21158898284213e-05
ENSG00000155093	PTPRN2	0.0422412680265337	2.58131851606018e-07	1.21299765364368e-05
ENSG00000263899	RP11-214C8.5	-0.0352523881375999	2.60989196161702e-07	1.22379290243119e-05
ENSG00000241755	IGKV1-9	0.0499025048280749	2.63022184868579e-07	1.23068474551677e-05
ENSG00000254802	AC022182.3	0.0418487613489167	2.74464445054568e-07	1.28147918565969e-05
ENSG00000115415	STAT1	0.0407322124040151	2.75220462118085e-07	1.28226915090454e-05
ENSG00000170476	MZB1	0.0498560013579618	2.79899111291101e-07	1.29852982607683e-05
ENSG00000173221	GLRX	0.033517823467768	2.79404457952924e-07	1.29852982607683e-05
ENSG00000114982	KANSL3	-0.0159431211412874	2.84322187929966e-07	1.31625511196138e-05
ENSG00000110906	KCTD10	-0.0168755997284727	2.87298370122623e-07	1.3272212865855e-05
ENSG00000065911	MTHFD2	0.03261573609324	2.90767403087675e-07	1.34041319090059e-05
ENSG00000129562	DAD1	0.0187526602538789	2.93061951934869e-07	1.34814667615344e-05
ENSG00000140534	TICRR	0.0497621937820218	3.11088975775116e-07	1.42806832135758e-05
ENSG00000269220	LINC00528	0.0269502952118023	3.27267311387453e-07	1.4991861679512e-05
ENSG00000169021	UQCRFS1	0.0180399877284295	3.33552473466884e-07	1.52478140119767e-05
ENSG00000148773	MKI67	0.0477073218192515	3.51490744751703e-07	1.60342886504582e-05
ENSG00000114737	CISH	0.0338534017045388	3.61745911488671e-07	1.64677289832061e-05
ENSG00000141971	FAM125A	0.0255549144579465	3.64365391902613e-07	1.64839506800497e-05
ENSG00000243290	IGKV1-12	0.0494114900233913	3.64214382045946e-07	1.64839506800497e-05
ENSG00000255337	RP11-315O6.1	0.0497754515806698	3.62981912224672e-07	1.64839506800497e-05
ENSG00000239951	IGKV3-20	0.0497051985700422	3.66746058006243e-07	1.6557372135319e-05
ENSG00000169239	CA5B	-0.0221887472347532	3.70326407802345e-07	1.66845409008022e-05
ENSG00000162772	ATF3	0.0482910844743394	3.71807932361702e-07	1.67168212552172e-05
ENSG00000106605	BLVRA	0.0380123895052474	3.83711297831293e-07	1.72165822770258e-05
ENSG00000121152	NCAPH	0.0465419967094676	3.89963040153203e-07	1.74362022833324e-05
ENSG00000211655	IGLV1-36	0.0482365829640289	3.90201954901357e-07	1.74362022833324e-05
ENSG00000186566	GPATCH8	-0.0182880314416425	3.92269737795394e-07	1.74928286542187e-05
ENSG00000111665	CDCA3	0.047359106390033	3.96717249727928e-07	1.76551295800508e-05
ENSG00000121621	KIF18A	0.0468472712740924	4.03032601088965e-07	1.78997263544613e-05
ENSG00000104518	GSDMD	0.0226514008562363	4.05185624522725e-07	1.795884600699e-05
ENSG00000119922	IFIT2	0.0492655001290622	4.12153965589672e-07	1.82307212593116e-05
ENSG00000067066	SP100	0.0328246439533417	4.16835535944512e-07	1.83634542256523e-05
ENSG00000102974	CTCF	-0.021978179209018	4.16729377497315e-07	1.83634542256523e-05
ENSG00000110324	IL10RA	-0.0189109177582909	4.19711582064979e-07	1.84158991560278e-05
ENSG00000130203	APOE	0.0495815313207903	4.19075996717587e-07	1.84158991560278e-05
ENSG00000051620	HEBP2	0.0291541610886787	4.22709317846694e-07	1.85102631348058e-05
ENSG00000158467	AHCYL2	-0.0208950480821132	4.27791737080406e-07	1.86953544938879e-05
ENSG00000117010	ZNF684	0.0462789038904083	4.36828663318005e-07	1.90521818805624e-05
ENSG00000134851	TMEM165	0.0298465635027491	4.40619567354892e-07	1.91792393750433e-05
ENSG00000196584	XRCC2	0.0458321096780555	4.47041839736151e-07	1.94201018689357e-05
ENSG00000072736	NFATC3	-0.0232816767558093	4.4902050190844e-07	1.94673551333359e-05
ENSG00000035499	DEPDC1B	0.0491315503093974	4.52452163450242e-07	1.95464853131982e-05
ENSG00000085063	CD59	0.0337260926362905	4.5352926885687e-07	1.95464853131982e-05
ENSG00000185811	IKZF1	-0.0176997412191509	4.53131082652077e-07	1.95464853131982e-05
ENSG00000168306	ACOX2	0.0492226595931035	4.57705663852487e-07	1.96876505134659e-05
ENSG00000249042	CTD-2015H6.3	0.0429690708882962	4.59289178229755e-07	1.97169505569713e-05
ENSG00000169439	SDC2	-0.0481773315394805	4.6554226811933e-07	1.99462041189715e-05
ENSG00000117399	CDC20	0.0486183077312382	4.66505484943526e-07	1.99483588091996e-05
ENSG00000213689	TREX1	0.0394612433365586	4.70776927356319e-07	2.00916926555917e-05
ENSG00000260669	AL136419.6	0.0178642926335091	4.75632032738273e-07	2.02593285523665e-05
ENSG00000198218	QRICH1	-0.0148022994918513	4.84616736338425e-07	2.06018682990874e-05
ENSG00000159496	RGL4	0.0265905382040434	4.85679589448553e-07	2.06069606000783e-05
ENSG00000175155	YPEL2	-0.0234590313378939	4.88328803417944e-07	2.06792106269099e-05
ENSG00000205837	LINC00487	0.0452523730390192	4.92497326425126e-07	2.08153947383277e-05
ENSG00000103657	HERC1	-0.0183909671463246	4.94996089715734e-07	2.08806169042056e-05
ENSG00000255328	RP11-326C3.12	0.0487180449755285	5.10997526113294e-07	2.15140788884424e-05
ENSG00000168758	SEMA4C	-0.0318395569254452	5.13896035572869e-07	2.15945043717361e-05
ENSG00000204264	PSMB8	0.0254598636816833	5.18068170896052e-07	2.17280376242795e-05
ENSG00000087589	CASS4	-0.0392151078900652	5.25704946081576e-07	2.20060896107826e-05
ENSG00000133169	BEX1	0.0461431314357196	5.30830976796182e-07	2.21781791089357e-05
ENSG00000081791	KIAA0141	-0.0125053507618099	5.37159889520223e-07	2.23889209450872e-05
ENSG00000210144	J01415.11	-0.0387391475207287	5.37924282466285e-07	2.23889209450872e-05
ENSG00000029153	ARNTL2	0.0443262595025777	5.43942848514063e-07	2.25107863312136e-05
ENSG00000136816	TOR1B	0.041634267153604	5.43120607778781e-07	2.25107863312136e-05
ENSG00000247473	CARS-AS1	0.0397088462190078	5.42141034554216e-07	2.25107863312136e-05
ENSG00000144130	NT5DC4	0.0442068268067182	5.47557884349319e-07	2.26175563911474e-05
ENSG00000198763	MT-ND2	-0.031390350059368	5.61376017320287e-07	2.3144579914086e-05
ENSG00000189241	TSPYL1	-0.0165906205719409	5.63708704718245e-07	2.31969847585657e-05
ENSG00000142507	PSMB6	0.0219297108078637	5.70432309902603e-07	2.34295421121838e-05
ENSG00000116704	SLC35D1	-0.0217537460059221	5.76181534095795e-07	2.36212808659047e-05
ENSG00000223722	RP11-467L13.5	0.048800337409782	5.77506535804838e-07	2.36312646327182e-05
ENSG00000225830	ERCC6	-0.0206945451169476	5.82799344298767e-07	2.3783611081001e-05
ENSG00000257034	AL021707.2	0.0342522708537118	5.83406504938745e-07	2.3783611081001e-05
ENSG00000130812	ANGPTL6	0.0336279180314653	5.8595475162632e-07	2.38430116904781e-05
ENSG00000211962	IGHV1-46	0.0488347057404206	5.98118712677249e-07	2.42927360422129e-05
ENSG00000003400	CASP10	0.0229148095793154	6.01127430955844e-07	2.43245101737336e-05
ENSG00000109674	NEIL3	0.0487890004681805	6.00933596309622e-07	2.43245101737336e-05
ENSG00000261211	RP1-80N2.3	0.0472141372306534	6.07566210860538e-07	2.45396104870862e-05
ENSG00000196220	SRGAP3	-0.0387668255967561	6.09781180753311e-07	2.45836320676026e-05
ENSG00000211648	IGLV1-47	0.0487374905444726	6.29768390237189e-07	2.53426686833754e-05
ENSG00000268734	CTB-61M7.2	0.0404345638010844	6.31870568326624e-07	2.53805216700461e-05
ENSG00000228253	MT-ATP8	-0.0319173899716936	6.33376859447463e-07	2.53943445060303e-05
ENSG00000221963	APOL6	0.0415765285942748	6.36056588465228e-07	2.54550778654829e-05
ENSG00000197697	HIST1H2BE	0.0485974683252289	6.4025691493928e-07	2.55296603071865e-05
ENSG00000216331	HIST1H1PS1	0.0482931392989777	6.39097101556837e-07	2.55296603071865e-05
ENSG00000141068	KSR1	-0.0277731354550101	6.44879825407155e-07	2.56671567667973e-05
ENSG00000143476	DTL	0.0482947630946925	6.4914865317861e-07	2.57900858556469e-05
ENSG00000108700	CCL8	0.0412212785285443	6.51379785585261e-07	2.58317598817124e-05
ENSG00000163840	DTX3L	0.0369370109984362	6.57721457891314e-07	2.60359992325781e-05
ENSG00000226738	CTA-384D8.31	0.038624242206554	6.66621543560687e-07	2.63405919499902e-05
ENSG00000150938	CRIM1	-0.0329724186941265	6.68389327063517e-07	2.63627710932579e-05
ENSG00000136810	TXN	0.0402376968465531	6.73839597533882e-07	2.65298541364196e-05
ENSG00000259772	RP11-16E12.2	0.0380270719113482	6.79679261417719e-07	2.67116394626593e-05
ENSG00000244498	RP11-477J21.5	0.0476177141955773	7.11320191901083e-07	2.79049506521195e-05
ENSG00000079263	SP140	0.0347088838446027	7.26563608885484e-07	2.84518663400658e-05
ENSG00000237059	AC083863.7	0.0431429896836585	7.30483127293282e-07	2.85541803479168e-05
ENSG00000066279	ASPM	0.0481045805563678	7.32661348442227e-07	2.85881841514484e-05
ENSG00000085840	ORC1	0.0429943977162372	7.54950599314432e-07	2.94053931294468e-05
ENSG00000205413	SAMD9	0.0426892422920533	7.59836495711278e-07	2.95430378430376e-05
ENSG00000087250	MT3	0.0472577283889098	7.67289156183885e-07	2.97798141239326e-05
ENSG00000211897	IGHG3	0.0480062878101757	7.71789717565907e-07	2.99013778697387e-05
ENSG00000122641	INHBA	0.0446807879781916	7.91542430188806e-07	3.0612378127532e-05
ENSG00000221955	SLC12A8	0.0453482969114182	7.96853418673843e-07	3.07633287127953e-05
ENSG00000163687	DNASE1L3	-0.0470591500759864	8.1147733592049e-07	3.12726477375637e-05
ENSG00000100226	GTPBP1	0.029561131628578	8.16546103974677e-07	3.14125861231526e-05
ENSG00000091542	ALKBH5	-0.0160287385015096	8.24080727133643e-07	3.16467275370777e-05
ENSG00000166068	SPRED1	-0.0405915257878981	8.4076556221001e-07	3.22308215786859e-05
ENSG00000169228	RAB24	0.0294590695471113	8.42314709809e-07	3.22336580105717e-05
ENSG00000260943	RP11-476D10.1	0.0472912230629523	8.66961769424406e-07	3.31188489924698e-05
ENSG00000164104	HMGB2	0.042768363520988	8.70368408684684e-07	3.31909600317086e-05
ENSG00000129667	RHBDF2	0.0316321840189367	8.7728909144979e-07	3.33385111952511e-05
ENSG00000255441	CTD-2616J11.2	-0.0370179650335077	8.76595931737827e-07	3.33385111952511e-05
ENSG00000071539	TRIP13	0.0447082304210806	8.84039330606878e-07	3.35367073143939e-05
ENSG00000005001	PRSS22	-0.0475753332486586	8.85986329454969e-07	3.35523176515087e-05
ENSG00000104490	NCALD	-0.0340097378295901	9.01864057036176e-07	3.40356330056951e-05
ENSG00000130222	GADD45G	0.0390496603178788	9.00452440264478e-07	3.40356330056951e-05
ENSG00000197536	C5orf56	0.0340265883466036	9.06678552849709e-07	3.41583328591707e-05
ENSG00000267194	RP1-193H18.2	0.0375023322410463	9.27187026695059e-07	3.48708497767878e-05
ENSG00000134057	CCNB1	0.0430614129386242	9.41991573828205e-07	3.53667661163576e-05
ENSG00000130066	SAT1	0.03584896352252	9.45053509405833e-07	3.54208648954149e-05
ENSG00000063978	RNF4	-0.0175261840859085	9.58433610400698e-07	3.567756868972e-05
ENSG00000067840	PDZD4	-0.038373920210622	9.5480540232206e-07	3.567756868972e-05
ENSG00000131378	RFTN1	-0.0215912797727633	9.56665926310145e-07	3.567756868972e-05
ENSG00000178741	COX5A	0.0227520266182885	9.57434091841758e-07	3.567756868972e-05
ENSG00000137200	FTSJD2	0.0326786372810836	9.95594059119302e-07	3.69978329690746e-05
ENSG00000136193	SCRN1	-0.029709744650486	1.00147063952268e-06	3.71492394250481e-05
ENSG00000211942	IGHV3-13	0.0466975313655491	1.00306856714926e-06	3.71492394250481e-05
ENSG00000156650	KAT6B	-0.0258671891512076	1.01259401442346e-06	3.74385648209256e-05
ENSG00000254667	AP000783.1	0.0424681640282754	1.02001570082696e-06	3.76492619573815e-05
ENSG00000117650	NEK2	0.047740607126273	1.04544388670552e-06	3.85227561018589e-05
ENSG00000144028	SNRNP200	-0.0183301129855449	1.05008436240816e-06	3.86286084225264e-05
ENSG00000232216	IGHV3-43	0.0468285263777368	1.05498285114306e-06	3.87435803030708e-05
ENSG00000154277	UCHL1	0.0365120404036623	1.05946039932473e-06	3.88427335329608e-05
ENSG00000183486	MX2	0.0417934249685301	1.07155152712096e-06	3.92202218075713e-05
ENSG00000120280	CXorf21	0.0320746968505156	1.0758015533431e-06	3.93099326790971e-05
ENSG00000233966	UBE2SP1	0.0451582879923263	1.08092402863807e-06	3.94311701999505e-05
ENSG00000225431	AP001626.1	0.0453444664414459	1.08379198730447e-06	3.94698978576499e-05
ENSG00000100918	REC8	0.0339163124134049	1.08638696754155e-06	3.9498571759984e-05
ENSG00000133067	LGR6	-0.0437531289236235	1.11501737489196e-06	4.04121681429116e-05
ENSG00000181929	PRKAG1	0.0152326847957906	1.11521382958106e-06	4.04121681429116e-05
ENSG00000150782	IL18	0.032119204872887	1.12035555110374e-06	4.04642795820955e-05
ENSG00000166165	CKB	-0.0419597540108434	1.12004504070666e-06	4.04642795820955e-05
ENSG00000168394	TAP1	0.0340028472171923	1.15335148412137e-06	4.15872661378482e-05
ENSG00000240834	IGKV1D-12	0.0442257020626623	1.16154959943406e-06	4.18138719888527e-05
ENSG00000197121	PGAP1	0.0407022077732406	1.16678142597213e-06	4.19331265442714e-05
ENSG00000137812	CASC5	0.0448317344509136	1.17023328601117e-06	4.19881240273071e-05
ENSG00000185499	MUC1	0.0399142202649706	1.18605431831399e-06	4.24860211630805e-05
ENSG00000241468	ATP5J2	0.0237467196247542	1.19137120731874e-06	4.25370134822252e-05
ENSG00000254777	AC022182.1	0.0422779763976923	1.19109739514806e-06	4.25370134822252e-05
ENSG00000213722	DDAH2	0.0294908074314236	1.22328448781565e-06	4.36052028438169e-05
ENSG00000144668	ITGA9	0.0470965131632872	1.23397549702407e-06	4.390715514878e-05
ENSG00000169375	SIN3A	-0.0217584405871853	1.2358639670904e-06	4.390715514878e-05
ENSG00000197353	LYPD2	-0.0474154094841575	1.23778351433108e-06	4.390715514878e-05
ENSG00000090889	KIF4A	0.0469488525515162	1.24680349687205e-06	4.41490236180006e-05
ENSG00000134470	IL15RA	0.0290715806905308	1.24935701821601e-06	4.41490236180006e-05
ENSG00000197956	S100A6	0.0301641318910393	1.25066338472117e-06	4.41490236180006e-05
ENSG00000183337	BCOR	-0.0244641370368358	1.26946082180712e-06	4.47403038988828e-05
ENSG00000163453	IGFBP7	0.0285410246090564	1.29243028275597e-06	4.54764800458949e-05
ENSG00000141664	ZCCHC2	0.0450655840025403	1.31254150994829e-06	4.6109878671833e-05
ENSG00000136231	IGF2BP3	0.0405477355264801	1.32129098126717e-06	4.63427435500303e-05
ENSG00000025708	TYMP	0.0377167628282136	1.35233135473001e-06	4.72796678915288e-05
ENSG00000168288	MMADHC	0.0233908429415792	1.35146592460118e-06	4.72796678915288e-05
ENSG00000233029	RP11-439A17.9	0.0453224726491735	1.35626577193014e-06	4.73414750518298e-05
ENSG00000156970	BUB1B	0.0464116483498066	1.36264504881299e-06	4.74882886150122e-05
ENSG00000104147	OIP5	0.0419017879450723	1.38043700622444e-06	4.80317341130735e-05
ENSG00000128335	APOL2	0.0345244785419546	1.39387423646882e-06	4.83453110175874e-05
ENSG00000147697	GSDMC	0.0459119487037484	1.39322558741558e-06	4.83453110175874e-05
ENSG00000162545	CAMK2N1	-0.0406367166176492	1.41015794219474e-06	4.88325850949242e-05
ENSG00000164167	LSM6	0.0219954823060182	1.42327864365359e-06	4.92089582950547e-05
ENSG00000161643	SIGLEC16	0.0354533639413556	1.46946538183537e-06	5.07255735521085e-05
ENSG00000139641	ESYT1	-0.027854005018357	1.47671765839351e-06	5.08955166459884e-05
ENSG00000171867	PRNP	-0.0248408809425686	1.48848825043581e-06	5.12204043468865e-05
ENSG00000166851	PLK1	0.0356597529219888	1.51096697510213e-06	5.19121688254034e-05
ENSG00000155090	KLF10	-0.0277046332019571	1.5226476097331e-06	5.22313546629167e-05
ENSG00000211956	IGHV4-34	0.0470109909586169	1.54334960411642e-06	5.28585144193542e-05
ENSG00000072134	EPN2	-0.0311056657525636	1.5619023013769e-06	5.34102146907459e-05
ENSG00000146410	FAM54A	0.0361805438191471	1.57009325893343e-06	5.36064184389911e-05
ENSG00000136485	DCAF7	-0.0174479745495526	1.57664806435126e-06	5.37296635634243e-05
ENSG00000138311	ZNF365	-0.0436926436300091	1.57862084150466e-06	5.37296635634243e-05
ENSG00000166920	C15orf48	0.046921373943656	1.60311121408738e-06	5.44783563592898e-05
ENSG00000186417	GLDN	0.0401574503074086	1.61767117350398e-06	5.48026865305976e-05
ENSG00000197653	DNAH10	0.0441753506659338	1.61754977512211e-06	5.48026865305976e-05
ENSG00000106803	SEC61B	0.0193613297979292	1.63406672202501e-06	5.52238733122565e-05
ENSG00000206249	CTD-2308N23.2	0.0440603133290291	1.63768568515593e-06	5.52238733122565e-05
ENSG00000261685	RP11-401P9.4	0.0407656790316898	1.63675836077713e-06	5.52238733122565e-05
ENSG00000230825	AC005532.5	0.0454882410472041	1.64035704753593e-06	5.52287239533243e-05
ENSG00000228261	RP11-127L20.3	0.0450102270074429	1.6462123692331e-06	5.53405945847884e-05
ENSG00000177294	FBXO39	0.0443352056705407	1.64910765793061e-06	5.53527671788661e-05
ENSG00000072042	RDH11	-0.0189623181803501	1.65510255462233e-06	5.54687820875038e-05
ENSG00000265206	hsa-mir-142	0.0251997697128588	1.65764731685207e-06	5.54689916087818e-05
ENSG00000198848	CES1	0.0448505523662535	1.66524482265046e-06	5.56380192962311e-05
ENSG00000100526	CDKN3	0.046745942396306	1.67116233705528e-06	5.56655003460289e-05
ENSG00000130147	SH3BP4	-0.0373070146098367	1.66978625402644e-06	5.56655003460289e-05
ENSG00000134825	C11orf10	0.0228987217866675	1.68187475211012e-06	5.59370551116564e-05
ENSG00000188487	INSC	0.0457514491034499	1.68965970842318e-06	5.61105688278951e-05
ENSG00000123975	CKS2	0.0446267230165259	1.75068393396216e-06	5.79599988050583e-05
ENSG00000136634	IL10	0.0463560911429679	1.75330919455144e-06	5.79599988050583e-05
ENSG00000171522	PTGER4	-0.0284838078613582	1.75055057904263e-06	5.79599988050583e-05
ENSG00000211666	IGLV2-14	0.0467229420214719	1.76105448720422e-06	5.81110486058521e-05
ENSG00000249119	MTND6P4	-0.0407291337211951	1.76585676968037e-06	5.81110486058521e-05
ENSG00000258521	RP11-638I2.9	0.0441797275270656	1.7648329855101e-06	5.81110486058521e-05
ENSG00000138778	CENPE	0.0455278238508308	1.76970310360167e-06	5.81500488974436e-05
ENSG00000104081	BMF	-0.0261024059148818	1.7765225789096e-06	5.81990927612498e-05
ENSG00000110237	ARHGEF17	0.0453914743588513	1.77525883944899e-06	5.81990927612498e-05
ENSG00000135940	COX5B	0.0201595652288287	1.78458382529814e-06	5.83756604290265e-05
ENSG00000132846	ZBED3	-0.0292770904763379	1.83187836885542e-06	5.98331453480714e-05
ENSG00000231890	AC093391.2	0.0356756904268977	1.88525179247339e-06	6.14845327124418e-05
ENSG00000184154	LRTOMT	0.0175598541491653	1.90879014681835e-06	6.21594239912485e-05
ENSG00000156500	FAM122C	0.0239325087054411	1.93001901849491e-06	6.27572106743039e-05
ENSG00000242013	AF238380.3	-0.0262651910283258	1.94190190773565e-06	6.30497750162432e-05
ENSG00000197846	HIST1H2BF	0.0449795761989037	1.95144177593495e-06	6.32655107506746e-05
ENSG00000255833	TIFAB	-0.0395628286885037	1.95462825735107e-06	6.32749363724123e-05
ENSG00000124557	BTN1A1	0.0418997492311594	2.00217418245509e-06	6.47182071905712e-05
ENSG00000124496	TRERF1	-0.023637947467278	2.02494779558101e-06	6.5357657727091e-05
ENSG00000173545	ZNF622	0.0131788382547385	2.06482490119906e-06	6.65464438290571e-05
ENSG00000180155	LYNX1	-0.0429547428892103	2.07882443787108e-06	6.68989584564373e-05
ENSG00000090530	LEPREL1	-0.0457269697964468	2.08571081575336e-06	6.69234464537836e-05
ENSG00000126016	AMOT	-0.0339455836000227	2.0830200866441e-06	6.69234464537836e-05
ENSG00000134248	LAMTOR5	0.022049101242499	2.09080675840498e-06	6.69885901435591e-05
ENSG00000099985	OSM	0.0394720588360503	2.09441227953502e-06	6.70058604979791e-05
ENSG00000157856	CCDC164	0.0458631695678615	2.10785166989315e-06	6.73372322205193e-05
ENSG00000120265	PCMT1	0.0283992218080655	2.11171850000585e-06	6.73622787498216e-05
ENSG00000202198	RN7SK	0.0378173299970447	2.16698122838007e-06	6.90243539669577e-05
ENSG00000125826	RBCK1	0.0302610649835825	2.18251955028663e-06	6.94180999902666e-05
ENSG00000029993	HMGB3	0.0421120560093289	2.18580644812887e-06	6.94215940378835e-05
ENSG00000140853	NLRC5	0.0234829174470813	2.19746911206663e-06	6.96907076455266e-05
ENSG00000117226	GBP3	0.0382893891954395	2.20084027317748e-06	6.96964649408712e-05
ENSG00000183779	ZNF703	-0.0404600845275927	2.22686669250786e-06	7.04186166396372e-05
ENSG00000105402	NAPA	0.0339702022116498	2.28237115360441e-06	7.20538700070781e-05
ENSG00000177733	HNRNPA0	-0.0176285072927245	2.28517376389662e-06	7.20538700070781e-05
ENSG00000120306	CYSTM1	0.0375816064992856	2.35417425943453e-06	7.41225673528873e-05
ENSG00000155115	GTF3C6	0.0228388027018511	2.39732173585624e-06	7.53724852520788e-05
ENSG00000214189	ZNF788	0.0395532582930852	2.44508417832128e-06	7.67636988225549e-05
ENSG00000181472	ZBTB2	-0.0164789658980576	2.48712013804778e-06	7.79713947438766e-05
ENSG00000145494	NDUFS6	0.0208879401326215	2.5176969210632e-06	7.88168988856046e-05
ENSG00000231105	RP5-1071N3.1	0.0277230281428215	2.52515911455624e-06	7.8937413179068e-05
ENSG00000248099	INSL3	0.0376423291640415	2.54582483995374e-06	7.94697408254703e-05
ENSG00000121236	TRIM6	0.0459109989115083	2.57032006567951e-06	8.01199197648546e-05
ENSG00000143543	JTB	0.0158309065400773	2.62713359466628e-06	8.16578892987949e-05
ENSG00000180182	MED14	-0.0170723115998513	2.62556902009654e-06	8.16578892987949e-05
ENSG00000145050	MANF	0.0258704884072035	2.63431985053023e-06	8.17649475197954e-05
ENSG00000159210	SNF8	0.0136304607567261	2.64300004500416e-06	8.19180056501928e-05
ENSG00000131747	TOP2A	0.0446078830768509	2.65077373371079e-06	8.20425734494539e-05
ENSG00000214262	ANKRD36BP1	-0.0302898066869606	2.67778543369762e-06	8.27613713037152e-05
ENSG00000164087	POC1A	0.0344486289252825	2.73258112282137e-06	8.42166856343722e-05
ENSG00000164898	C7orf55	0.0241341492287351	2.72939621521061e-06	8.42166856343722e-05
ENSG00000196465	MYL6B	0.0325134893519983	2.77866540107488e-06	8.55163629280101e-05
ENSG00000225339	RP11-513I15.6	-0.0162859850286197	2.84149398181704e-06	8.73269831176993e-05
ENSG00000211644	IGLV1-51	0.0457008241925683	2.88167622427632e-06	8.83134743010685e-05
ENSG00000256950	PSMD9	0.0169832827336694	2.8809734822606e-06	8.83134743010685e-05
ENSG00000151576	QTRTD1	-0.0151277180292734	2.91838650561766e-06	8.90637758858261e-05
ENSG00000215414	PSMA6P1	0.0428965796453046	2.91250857753052e-06	8.90637758858261e-05
ENSG00000237240	U47924.25	0.0413365840610056	2.91475405671045e-06	8.90637758858261e-05
ENSG00000241624	RP4-697K14.12	0.0430805767496333	2.97194342605495e-06	9.05717375212366e-05
ENSG00000096080	MRPS18A	0.0205323649455569	2.99180869567473e-06	9.10501557231037e-05
ENSG00000099942	CRKL	-0.0194713246248302	2.99991804543623e-06	9.11699710859905e-05
ENSG00000078699	CBFA2T2	-0.0167080856193132	3.02808573528197e-06	9.18981963911754e-05
ENSG00000163362	C1orf106	0.0449624971993015	3.04243352627172e-06	9.22055686304624e-05
ENSG00000254505	CHMP4A	0.0172487831096608	3.08198148981163e-06	9.32747611272493e-05
ENSG00000240065	PSMB9	0.031250939767215	3.14311723076612e-06	9.49934365276217e-05
ENSG00000115129	TP53I3	0.0296796510071415	3.14773007930091e-06	9.50014502248676e-05
ENSG00000148175	STOM	0.0314629599888974	3.15413915240654e-06	9.5063578785152e-05
ENSG00000135899	SP110	0.0327163866549531	3.27905830324543e-06	9.86924283529144e-05
ENSG00000132514	CLEC10A	-0.0390114335741658	3.31602005860464e-06	9.9667612517978e-05
ENSG00000119689	DLST	-0.00892290310927974	3.34447085995603e-06	0.000100384660385851
ENSG00000173786	CNP	0.0292119710696067	3.35038405790546e-06	0.000100424200341965
ENSG00000107371	EXOSC3	0.0175746717730409	3.3850962740279e-06	0.000101325669429841
ENSG00000030110	BAK1	0.0267428058090441	3.53148984833292e-06	0.000105452134002484
ENSG00000211677	IGLC2	0.0447586570309138	3.5326054683913e-06	0.000105452134002484
ENSG00000151914	DST	-0.0346269398956197	3.53823469215405e-06	0.000105476079479206
ENSG00000136026	CKAP4	0.0333579901857089	3.57536056027754e-06	0.000106437607088044
ENSG00000148218	ALAD	-0.0123098213674398	3.59067705257235e-06	0.00010674814187178
ENSG00000145088	EAF2	0.0442290982900591	3.61773354824446e-06	0.00010740638011235
ENSG00000143753	DEGS1	0.021273699168858	3.63357240886644e-06	0.000107730245191507
ENSG00000152518	ZFP36L2	-0.0258250109945787	3.68084876414448e-06	0.000108984046538375
ENSG00000111247	RAD51AP1	0.0447871092096878	3.69307329708728e-06	0.000109198030601697
ENSG00000090520	DNAJB11	0.0210786025940294	3.76541065746771e-06	0.000111186470643685
ENSG00000143612	C1orf43	0.0136521505635572	3.83437715487386e-06	0.000113070141985356
ENSG00000183134	PTGDR2	-0.0424035383660583	3.8551472552592e-06	0.000113529410612761
ENSG00000129173	E2F8	0.0451596093380529	3.8655370875038e-06	0.000113682168101004
ENSG00000170962	PDGFD	-0.0391724399964184	3.88696523171333e-06	0.000114158706019043
ENSG00000070061	IKBKAP	-0.0204669763447184	3.9321430166534e-06	0.000115175947797444
ENSG00000174099	MSRB3	0.0373483265237462	3.92791871986926e-06	0.000115175947797444
ENSG00000100902	PSMA6	0.0360844031358149	3.94189469734015e-06	0.000115307016106532
ENSG00000174371	EXO1	0.0450705768423785	3.95381146560092e-06	0.000115500981731077
ENSG00000159023	EPB41	-0.024109495715507	3.96407225840966e-06	0.000115646118716301
ENSG00000211660	IGLV2-23	0.0449849192531507	3.97557833845804e-06	0.000115827149698196
ENSG00000110079	MS4A4A	0.0401968474071288	4.02591325395002e-06	0.000117137457406208
ENSG00000103489	XYLT1	-0.0257773476332504	4.04146248459416e-06	0.000117433506317642
ENSG00000204261	XXbac-BPG246D15.8	0.0244909432026356	4.07554148359172e-06	0.000118266476703802
ENSG00000117724	CENPF	0.0404788115592586	4.10354625522543e-06	0.000118763694335008
ENSG00000148154	UGCG	0.0360073234184915	4.09843124269406e-06	0.000118763694335008
ENSG00000259261	IGHV4OR15-8	0.041397714635395	4.11220757546321e-06	0.000118856941443713
ENSG00000204466	DGKK	-0.0442707400919224	4.12403384339283e-06	0.000119041299223219
ENSG00000128383	APOBEC3A	0.0392272009193731	4.19442996045049e-06	0.00012091357396544
ENSG00000100097	LGALS1	0.0303236969007566	4.21868537901382e-06	0.000121452561550502
ENSG00000143162	CREG1	0.0297581572545844	4.23416496365032e-06	0.000121737813974636
ENSG00000168243	GNG4	0.033939190052371	4.28037600480611e-06	0.00012290472546783
ENSG00000258461	RP11-164J13.1	0.0229784639170126	4.38256092894407e-06	0.000125673673042463
ENSG00000114127	XRN1	0.0303827953858596	4.40048529739227e-06	0.000126022286020077
ENSG00000163877	SNIP1	-0.0169932611671528	4.41187310754936e-06	0.000126183035697724
ENSG00000171155	C1GALT1C1	0.0295974219220374	4.44522389506104e-06	0.000126970702393436
ENSG00000008394	MGST1	0.0310768869604519	4.49178537247497e-06	0.000127974951688348
ENSG00000254470	AP5B1	0.0374765836603185	4.49398619011498e-06	0.000127974951688348
ENSG00000258790	KIAA0391	0.0272700834276924	4.49795262901705e-06	0.000127974951688348
ENSG00000106367	AP1S1	0.0229309213137092	4.52989588620981e-06	0.000128382302217342
ENSG00000112984	KIF20A	0.0438091368621651	4.52107635869257e-06	0.000128382302217342
ENSG00000135525	MAP7	-0.0375422458628634	4.52923874055215e-06	0.000128382302217342
ENSG00000168961	LGALS9	0.0368654328853033	4.67950069328025e-06	0.000132450478819775
ENSG00000163565	IFI16	0.0349483087378393	4.68931709077099e-06	0.000132556620634459
ENSG00000228601	RPL39P	-0.0402549105371017	4.72501065776258e-06	0.000133393033440271
ENSG00000254760	CTD-2616J11.3	-0.0335214688864841	4.74685682474629e-06	0.000133836862551653
ENSG00000106144	CASP2	-0.0149375628537228	4.89594796815684e-06	0.00013786257609819
ENSG00000106069	CHN2	-0.0285600640434146	4.94608409514699e-06	0.000139095088240743
ENSG00000147684	NDUFB9	0.0196394230353873	4.96950819285417e-06	0.000139574194758427
ENSG00000123737	EXOSC9	0.0203547192112532	4.98006959541573e-06	0.000139691271796443
ENSG00000111912	NCOA7	0.0280958756787115	5.02233110852013e-06	0.000140271204103987
ENSG00000131979	GCH1	0.0324175140222102	5.00871879437077e-06	0.000140271204103987
ENSG00000135211	TMEM60	0.0247151646558719	5.03884353790749e-06	0.000140271204103987
ENSG00000141458	NPC1	-0.0203862312455596	5.03775349943982e-06	0.000140271204103987
ENSG00000165699	TSC1	-0.0149165784070442	5.0456805833021e-06	0.000140271204103987
ENSG00000197847	SLC22A20	0.0372997639876101	5.0419694520758e-06	0.000140271204103987
ENSG00000269711	CTD-3214H19.16	0.0215044402715855	5.01407701373345e-06	0.000140271204103987
ENSG00000100336	APOL4	0.0445129837302856	5.15595791848603e-06	0.000143154811279337
ENSG00000186806	VSIG10L	0.0388240632576664	5.18878405954939e-06	0.000143883401630982
ENSG00000173402	DAG1	-0.0178113545641086	5.22866625815914e-06	0.000144805559451249
ENSG00000101096	NFATC2	-0.0250613906494944	5.2774266571856e-06	0.00014597094922299
ENSG00000115159	GPD2	0.0287803790752529	5.358122586611e-06	0.000147973043027873
ENSG00000168528	SERINC2	0.0380021806778878	5.36335408347789e-06	0.000147973043027873
ENSG00000256428	RP11-467L20.9	0.0232300663960814	5.45611925093708e-06	0.000150342574719075
ENSG00000066933	MYO9A	-0.0232205507059726	5.50185817554335e-06	0.000151411968506042
ENSG00000105426	PTPRS	-0.0367244660402572	5.57668029901268e-06	0.000153278039262548
ENSG00000090776	EFNB1	-0.0251796084222753	5.60805595158687e-06	0.000153946772108197
ENSG00000198815	FOXJ3	-0.0172216206887948	5.65048320704264e-06	0.000154916823785557
ENSG00000120949	TNFRSF8	-0.0302141685109227	5.66734520833659e-06	0.000155184411212234
ENSG00000106392	C1GALT1	0.0319189873868259	5.71429798857816e-06	0.00015608025697257
ENSG00000168259	DNAJC7	0.014880289120858	5.71434742474285e-06	0.00015608025697257
ENSG00000162654	GBP4	0.0373125972558809	5.76208234090872e-06	0.000157187592048934
ENSG00000101342	C20orf118	0.0252230741558494	5.80066492341948e-06	0.000158042804540697
ENSG00000135457	TFCP2	-0.0165331155358809	5.83631688092135e-06	0.000158816139682456
ENSG00000141086	CTRL	0.0269863273669892	5.93072773635128e-06	0.000161184492247527
ENSG00000172432	GTPBP2	0.0296816436824207	5.97393906529717e-06	0.000162157195671812
ENSG00000132002	DNAJB1	-0.0188522562170986	6.10818421914825e-06	0.000165595450834502
ENSG00000170989	S1PR1	-0.0273550639215074	6.2198286137588e-06	0.000168413228053586
ENSG00000142512	SIGLEC10	-0.034803761003909	6.25703422165116e-06	0.000169210958882796
ENSG00000175827	AP001266.1	0.0367310507107001	6.30893209718207e-06	0.00017040355408594
ENSG00000118985	ELL2	0.0335130568724979	6.43204006349687e-06	0.00017351420670058
ENSG00000102794	IRG1	0.0379713166618173	6.45764258417202e-06	0.000173990071648265
ENSG00000211598	IGKV4-1	0.0440435025334004	6.62008775005326e-06	0.000178147213579327
ENSG00000017373	SRCIN1	0.0438816898078772	6.64177872498221e-06	0.000178481111561781
ENSG00000080503	SMARCA2	-0.0207456737002702	6.64883185260583e-06	0.000178481111561781
ENSG00000151725	MLF1IP	0.0387274921280784	6.69379276958877e-06	0.000179467565408938
ENSG00000164096	C4orf3	0.0222596367218436	6.71453011553532e-06	0.000179802938179611
ENSG00000250687	RP11-497H16.7	0.0423009632987402	6.73076629645693e-06	0.000180017104460074
ENSG00000023572	GLRX2	0.0249379573216225	6.77810910008586e-06	0.000181061689420509
ENSG00000118193	KIF14	0.0440065142372998	6.80453996933962e-06	0.000181470995115226
ENSG00000183864	TOB2	-0.0205308246579847	6.81004146238091e-06	0.000181470995115226
ENSG00000136048	DRAM1	0.0270395303408206	6.85861157231927e-06	0.000182130953264801
ENSG00000184209	SNRNP35	0.0178000241424722	6.85981303084213e-06	0.000182130953264801
ENSG00000225450	RP3-508I15.14	0.0311664134358325	6.85417151334374e-06	0.000182130953264801
ENSG00000105879	CBLL1	-0.0203913193849539	6.89789492944842e-06	0.000182893398130988
ENSG00000258659	TRIM34	0.0252016183900214	6.90526993995997e-06	0.000182893398130988
ENSG00000101413	RPRD1B	-0.0174932894287652	6.93479162578521e-06	0.000183452944085996
ENSG00000105974	CAV1	0.0435703727085327	7.05543150967858e-06	0.000186193519224621
ENSG00000198744	RP5-857K21.11	-0.0269458388260983	7.04710093359482e-06	0.000186193519224621
ENSG00000179837	RBM15B	-0.0125810613798865	7.16038167663321e-06	0.00018873522317987
ENSG00000169105	CHST14	-0.0206326165998467	7.21014320345285e-06	0.000189817878480299
ENSG00000129757	CDKN1C	-0.0418882486665587	7.24147578749993e-06	0.00019041334227757
ENSG00000152760	TCTEX1D1	0.0414207918065918	7.33307137635608e-06	0.000192590075294179
ENSG00000024526	DEPDC1	0.0419371416347316	7.35482417380535e-06	0.000192929487421153
ENSG00000225101	OR52K3P	0.0392120714792004	7.38864295944573e-06	0.000193584217394303
ENSG00000251380	C5orf20	-0.0376762774805017	7.4096033245039e-06	0.000193900888914652
ENSG00000160007	ARHGAP35	-0.0214409645851607	7.43919706290134e-06	0.000194442458159638
ENSG00000060237	WNK1	-0.0251257028382228	7.44835392789364e-06	0.000194449201527364
ENSG00000256545	AL139819.1	0.0380793626324922	7.4706372371082e-06	0.000194798203183832
ENSG00000116815	CD58	0.0292684787729797	7.55529233749083e-06	0.000196770790067356
ENSG00000122223	CD244	-0.0249135576694547	7.57809401652063e-06	0.000197129681374991
ENSG00000117632	STMN1	0.0327843536153323	7.59611919485051e-06	0.000197363615370605
ENSG00000100804	PSMB5	0.0175617828335955	7.62472243641657e-06	0.000197871508263822
ENSG00000136827	TOR1A	0.0235792734249908	7.77327448600523e-06	0.00020145014928343
ENSG00000188474	ZNF788	0.0391751016581629	7.7810592648032e-06	0.00020145014928343
ENSG00000117281	CD160	-0.0374375672955633	7.84522490698611e-06	0.000202871017091779
ENSG00000168275	COA6	0.0280171441848677	7.9231020418148e-06	0.000204642674604841
ENSG00000137767	SQRDL	0.0285259949724194	7.94061239759634e-06	0.000204852799881792
ENSG00000175197	DDIT3	0.0283251500557639	7.98945829359077e-06	0.000205869874025061
ENSG00000121211	MND1	0.0388714549696337	8.06425948713951e-06	0.000207334433519299
ENSG00000129559	NEDD8	0.0150202716283461	8.06527245853297e-06	0.000207334433519299
ENSG00000233214	AC002511.2	0.041365097204277	8.10010655414728e-06	0.000207985227161777
ENSG00000159433	STARD9	-0.0298776014897331	8.1916767296197e-06	0.000209983053722318
ENSG00000163009	C2orf48	0.0435322133877862	8.19841102010115e-06	0.000209983053722318
ENSG00000259112	NDUFC2-KCTD14	0.0187549889914919	8.20674238610863e-06	0.000209983053722318
ENSG00000229195	AC009495.4	0.0430628754308416	8.23779039753576e-06	0.000210352532311239
ENSG00000259922	RP11-322D14.1	0.0394715811628828	8.24043602848478e-06	0.000210352532311239
ENSG00000121753	BAI2	-0.0366135657062729	8.33664431008304e-06	0.000212560110641335
ENSG00000100865	CINP	0.013516184580322	8.35697334607162e-06	0.000212830098583929
ENSG00000141837	CACNA1A	0.04042933329642	8.38106798824137e-06	0.000213195246345823
ENSG00000108826	MRPL27	0.0250794349511871	8.47866875236416e-06	0.000215427198730127
ENSG00000109436	TBC1D9	-0.0288198729804049	8.5352483213775e-06	0.000216612904843693
ENSG00000152207	CYSLTR2	-0.0363169761548797	8.73571940678208e-06	0.000221207946922641
ENSG00000198793	MTOR	-0.0131301926415486	8.73655476610862e-06	0.000221207946922641
ENSG00000007968	E2F2	0.0344245995031193	8.7484791169117e-06	0.000221253492110692
ENSG00000186081	KRT5	-0.043352119552192	8.82996605528792e-06	0.00022305617141514
ENSG00000100985	MMP9	0.0416200671358267	8.90778904894911e-06	0.000224762238462572
ENSG00000225612	AC099552.2	-0.0393954552727469	8.9909880349648e-06	0.00022659986107499
ENSG00000034510	TMSB10	0.0240318610274243	9.05484192082204e-06	0.000227946256695717
ENSG00000254549	RP4-541C22.4	0.030413722493275	9.11784257737997e-06	0.000229268099146524
ENSG00000003147	ICA1	0.0316628465237152	9.1322505580718e-06	0.000229366444763709
ENSG00000168496	FEN1	0.0295850004474206	9.31208204150731e-06	0.000233614586324887
ENSG00000173821	RNF213	0.0345490359833501	9.32293990729504e-06	0.000233618761369614
ENSG00000224373	IGHV4-59	0.0432815168412875	9.33781159545472e-06	0.000233723391949921
ENSG00000087077	TRIP6	0.0233480301970373	9.36590263756187e-06	0.000233890672609559
ENSG00000169641	LUZP1	-0.0229405981581116	9.3639718500424e-06	0.000233890672609559
ENSG00000131374	TBC1D5	-0.0226523613105282	9.43685063151548e-06	0.000235344214441201
ENSG00000166527	CLEC4D	0.042363937023794	9.44564898928806e-06	0.000235344214441201
ENSG00000080986	NDC80	0.0373797551912542	9.46294839014761e-06	0.00023550670304455
ENSG00000154518	ATP5G3	0.018115376078932	9.50710456273012e-06	0.000236336452559973
ENSG00000143653	SCCPDH	0.0269524059155503	9.63332419917236e-06	0.00023920200804104
ENSG00000111266	DUSP16	-0.0235537252826231	9.70850341366851e-06	0.000240795128367844
ENSG00000164687	FABP5	0.0413118172074725	9.78114854299411e-06	0.000242321855797012
ENSG00000075188	NUP37	0.0277002828664119	9.83242435101151e-06	0.000243316313130184
ENSG00000107954	NEURL	-0.0357598613023421	9.86763595727701e-06	0.000243635834240068
ENSG00000168710	AHCYL1	-0.0162595653126154	9.86245271562645e-06	0.000243635834240068
ENSG00000197006	METTL9	0.0225504745434227	9.90116192685907e-06	0.00024418768539932
ENSG00000167863	ATP5H	0.016977405151534	9.96536263016031e-06	0.000245493955841751
ENSG00000158163	DZIP1L	0.0425602843772863	1.01518494216119e-05	0.000249806375801399
ENSG00000065328	MCM10	0.0429995213045983	1.02050978890411e-05	0.000250834188946499
ENSG00000136982	DSCC1	0.0427220338332115	1.0235155441567e-05	0.000251115594885737
ENSG00000173239	LIPM	0.0399910017677966	1.02502862889407e-05	0.000251115594885737
ENSG00000211658	IGLV3-27	0.0416553499814399	1.02510233233297e-05	0.000251115594885737
ENSG00000180447	GAS1	-0.0433210664848152	1.02948801613322e-05	0.000251907532368724
ENSG00000228203	RNF144A-AS1	0.0406319581949775	1.03850318397497e-05	0.000253545620927788
ENSG00000265263	RP11-135L13.4	-0.0310687469460883	1.03790834277094e-05	0.000253545620927788
ENSG00000139842	CUL4A	-0.0153107575875144	1.0408088382756e-05	0.000253824932200447
ENSG00000158869	FCER1G	0.0289937700495419	1.04559973179954e-05	0.000254709027196787
ENSG00000141424	SLC39A6	-0.0210284062522884	1.04681527100146e-05	0.000254721163548474
ENSG00000160209	PDXK	0.0215982656795229	1.05342442477224e-05	0.000256044239218
ENSG00000162104	ADCY9	-0.0265857148667838	1.056261462264e-05	0.000256448546799231
ENSG00000158402	CDC25C	0.0422899386755706	1.06360899396262e-05	0.000257763129170727
ENSG00000254602	AP000662.4	0.0361905238148751	1.06403525015787e-05	0.000257763129170727
ENSG00000249967	PI4K2A	-0.0228881269365168	1.08575907569698e-05	0.000262734458062621
ENSG00000172159	FRMD3	0.0390989397322718	1.09771505443204e-05	0.000265333757238878
ENSG00000161692	DBF4B	0.0294752056328295	1.10261697728411e-05	0.000266224127852322
ENSG00000121774	KHDRBS1	-0.0128496639823964	1.10864188793509e-05	0.000267383376305404
ENSG00000228703	RP5-1160K1.6	-0.0305449143336778	1.11053621135178e-05	0.000267544947676381
ENSG00000113732	ATP6V0E1	0.0214455611686338	1.11549401530348e-05	0.000268443389079254
ENSG00000163710	PCOLCE2	0.0386374095180783	1.11779471533695e-05	0.000268701125685672
ENSG00000263585	RP11-498C9.13	0.0413666994333424	1.13506332916251e-05	0.000272552404456373
ENSG00000264044	RP11-192H23.7	-0.0205889965392372	1.15145652963773e-05	0.000276185253887092
ENSG00000159784	FAM131B	-0.0358328269243814	1.1534720097621e-05	0.000276365316724908
ENSG00000137842	TMEM62	0.0233059660054242	1.16174811111745e-05	0.000277635234610692
ENSG00000153066	TXNDC11	0.0215377017006815	1.16114654115787e-05	0.000277635234610692
ENSG00000212743	DKFZP667F0711	0.0379317515991255	1.16385462863665e-05	0.000277635234610692
ENSG00000258588	TRIM6-TRIM34	0.0255331529341537	1.16358148093612e-05	0.000277635234610692
ENSG00000058668	ATP2B4	-0.0211526892395591	1.16873274254793e-05	0.00027849486540256
ENSG00000121797	CCRL2	0.0359587669015909	1.17992209791316e-05	0.000280854877576258
ENSG00000132256	TRIM5	0.0341291359508872	1.19541502424986e-05	0.00028423301082572
ENSG00000070010	UFD1L	0.0141783132684076	1.1974967214967e-05	0.000284418487624179
ENSG00000184678	HIST2H2BE	0.0347944704536235	1.20594114296344e-05	0.000286113136969534
ENSG00000134531	EMP1	0.0388856030992371	1.21904476403032e-05	0.000288908320377728
ENSG00000152558	TMEM123	0.0344232150223435	1.22583275890556e-05	0.000290202292685216
ENSG00000229314	ORM1	0.0425453689510226	1.23474945197438e-05	0.000291846794056397
ENSG00000256262	USP30-AS1	0.027643240516483	1.23545048053713e-05	0.000291846794056397
ENSG00000102931	ARL2BP	-0.0134810705815353	1.24402263474265e-05	0.000293554412438031
ENSG00000106609	TMEM248	-0.0112339935023736	1.24839872231314e-05	0.000294269260855065
ENSG00000244437	IGKV3-15	0.0427018872715272	1.25364375655762e-05	0.000295187173755825
ENSG00000163634	THOC7	0.023195496177048	1.2590912158e-05	0.000296150722889621
ENSG00000185275	CD24P4	0.0420882976758424	1.2752439243425e-05	0.000299305638999011
ENSG00000198643	FAM3D	-0.0428298674538177	1.27481467291807e-05	0.000299305638999011
ENSG00000126262	FFAR2	0.0353345999205437	1.28184183029906e-05	0.000300455991476665
ENSG00000135108	FBXO21	-0.019667533477505	1.2828952452873e-05	0.000300455991476665
ENSG00000141540	TTYH2	-0.0240027719951292	1.28732249124102e-05	0.00030117006162856
ENSG00000250903	RP1-80B9.2	0.024513438706623	1.30005885742876e-05	0.000303824450199741
ENSG00000112992	NNT	-0.0200719774103695	1.30163826965926e-05	0.000303868566563296
ENSG00000211599	IGKV5-2	0.0420925457282282	1.30328262002231e-05	0.000303927732445117
ENSG00000132383	RPA1	-0.0199294104075722	1.31741420405719e-05	0.000306895711864111
ENSG00000267809	NDUFV2P1	0.027129892906149	1.32821431279587e-05	0.000309082118731656
ENSG00000185920	PTCH1	-0.0318900866954495	1.34415341018326e-05	0.000312458469850152
ENSG00000204120	GIGYF2	-0.0168416688814306	1.34723735121714e-05	0.000312842543692304
ENSG00000242590	RP11-54O7.14	0.0420358882001242	1.3639787610023e-05	0.000316393841896616
ENSG00000256663	RP11-424C20.2	0.0425095765391684	1.37496068545625e-05	0.000318603032215319
ENSG00000177479	ARIH2	-0.00949505648519783	1.37699278650143e-05	0.000318735904426301
ENSG00000198561	CTNND1	-0.0270987610609826	1.39210286540554e-05	0.00032189248372462
ENSG00000137501	SYTL2	-0.0324689040084138	1.39821141099077e-05	0.000321942229099678
ENSG00000153561	RMND5A	-0.0233840869178803	1.39731162518142e-05	0.000321942229099678
ENSG00000184182	UBE2F	0.0194962083219484	1.39598291124936e-05	0.000321942229099678
ENSG00000211689	TRGC1	-0.0376799695017235	1.39419482096927e-05	0.000321942229099678
ENSG00000183347	GBP6	0.0421545679739104	1.40041442270244e-05	0.000322110058426011
ENSG00000143157	POGK	-0.0145868723614624	1.40829896007527e-05	0.000323582971362825
ENSG00000172818	OVOL1	0.0331980609304064	1.4118362120087e-05	0.000324054969208005
ENSG00000232119	MCTS1	0.0266886754653106	1.42728256767607e-05	0.000327256572783733
ENSG00000169410	PTPN9	-0.0160259018292347	1.44882370703132e-05	0.000331847450967938
ENSG00000137752	CASP1	0.0292421794527449	1.45269971677648e-05	0.000332386822107675
ENSG00000162714	ZNF496	0.031872398279151	1.45483431040535e-05	0.000332527034693173
ENSG00000134285	FKBP11	0.0218924482347282	1.45726250922146e-05	0.000332733992570514
ENSG00000084463	WBP11	-0.0169078839472275	1.4625199971285e-05	0.00033355065237639
ENSG00000139197	PEX5	-0.0170999075656308	1.464131341081e-05	0.00033355065237639
ENSG00000163507	KIAA1524	0.0360315234008682	1.46541863659025e-05	0.00033355065237639
ENSG00000134107	BHLHE40	-0.0235475355917159	1.46996608579019e-05	0.000334237554012501
ENSG00000095794	CREM	0.0227931977986074	1.47276659641837e-05	0.000334526225554446
ENSG00000013374	NUB1	0.0273558997826304	1.47880928992123e-05	0.000335532389223056
ENSG00000140718	FTO	-0.0237765921079791	1.48026737088017e-05	0.000335532389223056
ENSG00000256569	RP11-173P15.5	-0.0204369296492648	1.4871645718035e-05	0.000336746456564541
ENSG00000134627	PIWIL4	0.0327136992879159	1.52516576602063e-05	0.000344716619617652
ENSG00000229692	SOS1-IT1	0.0258280399901833	1.5255181509783e-05	0.000344716619617652
ENSG00000107581	EIF3A	-0.0180542641248544	1.53547720373123e-05	0.000346608598953833
ENSG00000165685	TMEM52B	0.0383117356370645	1.53768252950504e-05	0.000346748203841223
ENSG00000147124	ZNF41	-0.0203560367910155	1.54239191900848e-05	0.000347451606414994
ENSG00000169871	TRIM56	0.0310605815929461	1.5500952275151e-05	0.000348827299860273
ENSG00000160716	CHRNB2	0.0367822151753992	1.56278986608389e-05	0.000351322236253077
ENSG00000168517	HEXIM2	0.0243131143985889	1.57241066416806e-05	0.000353121741240866
ENSG00000163959	SLC51A	0.028588859531478	1.58432703065614e-05	0.000355432545655723
ENSG00000269728	RP11-145M9.4	0.0301719941441075	1.58865073500281e-05	0.000356036997031245
ENSG00000172586	CHCHD1	0.0236983557416911	1.59415102127718e-05	0.00035690362670008
ENSG00000231486	AC096579.7	0.0422098354084748	1.59595307083689e-05	0.000356941356712968
ENSG00000101079	NDRG3	-0.0180801774247606	1.61904311072467e-05	0.000361735286425815
ENSG00000213928	IRF9	0.0292567698560927	1.64118920904217e-05	0.000366105542009618
ENSG00000224614	AC124944.2	0.0282406720581561	1.64195428662041e-05	0.000366105542009618
ENSG00000080546	SESN1	-0.0289683786110742	1.6547236930712e-05	0.000367826728558481
ENSG00000166224	SGPL1	-0.0172215389217429	1.65452176999935e-05	0.000367826728558481
ENSG00000175730	BAK1P1	0.0239421714863431	1.65284424550806e-05	0.000367826728558481
ENSG00000211937	IGHV2-5	0.0418962195723768	1.65826401320927e-05	0.000368239095047111
ENSG00000156983	BRPF1	-0.0148964539102921	1.66588283620193e-05	0.000369555389379172
ENSG00000203814	HIST2H2BF	0.0398022656699232	1.6706431068543e-05	0.000370235522595063
ENSG00000186431	FCAR	0.0350779859584831	1.67397052452184e-05	0.000370597061107667
ENSG00000261373	RP11-368I7.2	0.02748684376194	1.689664384007e-05	0.000373692879098553
ENSG00000136504	KAT7	-0.0177210275980299	1.69542980062554e-05	0.000374588843007773
ENSG00000204866	IGFL2	0.0368400994563466	1.70419414200292e-05	0.000376144911079856
ENSG00000101188	NTSR1	0.0381699127460072	1.71616970583871e-05	0.000378134107588612
ENSG00000163661	PTX3	0.0394206050843864	1.71666758833876e-05	0.000378134107588612
ENSG00000143365	RORC	-0.0364663591602885	1.72046925061102e-05	0.000378589865006057
ENSG00000213830	CFL1P5	0.0387178998032463	1.75200663520065e-05	0.000385141820782388
ENSG00000101084	C20orf24	0.0243978481002145	1.76926904901635e-05	0.000388545708442777
ENSG00000267855	NDUFA7	0.0196741607267103	1.78095952795606e-05	0.000390720347845058
ENSG00000127603	MACF1	-0.0187250541456651	1.78964887782682e-05	0.000392232874918695
ENSG00000100024	UPB1	0.0364499906549654	1.80712100925923e-05	0.000395227984777764
ENSG00000166394	CYB5R2	0.0388248635912869	1.80874094905388e-05	0.000395227984777764
ENSG00000246705	H2AFJ	0.0208926498227106	1.80870533727141e-05	0.000395227984777764
ENSG00000262359	DOC2B	0.0383469082460054	1.81378713494344e-05	0.000395934692164327
ENSG00000158186	MRAS	-0.0350824511461909	1.82562385405817e-05	0.000398120826696856
ENSG00000110057	UNC93B1	0.0326587995829901	1.8305336129875e-05	0.00039879351921625
ENSG00000110801	PSMD9	0.0135467928747567	1.84212739557041e-05	0.000400520653936408
ENSG00000170571	EMB	0.0254152415346339	1.84034217960719e-05	0.000400520653936408
ENSG00000166902	MRPL16	0.0122245165950281	1.84511932296834e-05	0.000400772388928242
ENSG00000163050	ADCK3	-0.0248422220499608	1.85683434112725e-05	0.000402916456682935
ENSG00000134905	CARS2	0.0229761231103462	1.86537729532153e-05	0.000404368643651496
ENSG00000100908	EMC9	0.0210924205363898	1.87703547659191e-05	0.000406492588691871
ENSG00000147576	ADHFE1	-0.0219046580045202	1.90061587552754e-05	0.000411191658377745
ENSG00000155252	PI4K2A	-0.0178369066238138	1.91823900017985e-05	0.000414593871344509
ENSG00000101126	ADNP	-0.0157972740401818	1.93565498825385e-05	0.000417944635853112
ENSG00000150867	PIP4K2A	-0.0202603044584166	1.95304575646648e-05	0.000420867877954132
ENSG00000240864	IGKV1-16	0.0416953847210632	1.95152129798417e-05	0.000420867877954132
ENSG00000228149	RPL3P1	0.0402119529960926	1.96101752039797e-05	0.000422169397420847
ENSG00000110200	ANAPC15	0.0206582020957767	1.97200582545698e-05	0.000424056186795551
ENSG00000267293	RP11-8H2.1	0.0385893518129833	1.97366318233067e-05	0.000424056186795551
ENSG00000102010	BMX	0.0401327467879421	1.97687034582145e-05	0.000424328034641892
ENSG00000160094	ZNF362	-0.0166435041404441	2.01140046053136e-05	0.000431316108567916
ENSG00000061938	TNK2	0.0266985323554496	2.02184564585872e-05	0.000433130874584892
ENSG00000164109	MAD2L1	0.0377135992201654	2.02428198563716e-05	0.000433228067268929
ENSG00000260170	SQRDL	0.0276687839225469	2.02653059347486e-05	0.000433284931487467
ENSG00000211592	IGKC	0.0416856256574379	2.03284751724963e-05	0.000434210665683497
ENSG00000110514	MADD	-0.0163861234626842	2.07317613917205e-05	0.000442392302900865
ENSG00000177602	GSG2	0.0382292657240768	2.08697246474871e-05	0.000444901808070478
ENSG00000078900	TP73	0.035532417852051	2.0912704629398e-05	0.00044511543187612
ENSG00000100263	RHBDD3	0.0218598215490587	2.09204864096277e-05	0.00044511543187612
ENSG00000145685	LHFPL2	0.0343876020792463	2.10244470098165e-05	0.000446892209738814
ENSG00000088854	C20orf194	-0.0193085831211758	2.11610822384042e-05	0.000449359385803082
ENSG00000176049	JAKMIP2	-0.0356068876661083	2.12638652494949e-05	0.00045083961135494
ENSG00000239002	SCARNA10	0.0405883794592123	2.12720534212138e-05	0.00045083961135494
ENSG00000034063	UHRF1	0.0267354349730996	2.1309342506147e-05	0.000451192289827344
ENSG00000255526	NEDD8-MDP1	0.0152565580641821	2.14031519573716e-05	0.000452739858103123
ENSG00000259399	TGIF2-C20ORF24	0.0239609043783796	2.16968416534797e-05	0.00045850840132513
ENSG00000101266	CSNK2A1	-0.01544431174331	2.18029590759941e-05	0.000460305757265262
ENSG00000140836	ZFHX3	-0.0276110568394981	2.18995365172383e-05	0.000461898428994378
ENSG00000145284	SCD5	-0.0374138493014935	2.19689449074737e-05	0.000462915540186315
ENSG00000077152	UBE2T	0.0395063608062326	2.20199585719661e-05	0.000463405112062558
ENSG00000142687	KIAA0319L	0.0308836070511929	2.20345939056793e-05	0.000463405112062558
ENSG00000070214	SLC44A1	0.0218610485316949	2.21890120009586e-05	0.000466203943493218
ENSG00000163808	KIF15	0.0412234828851721	2.22295419710481e-05	0.000466606841123317
ENSG00000131187	F12	0.0318182101558079	2.23090071390425e-05	0.000467670315291754
ENSG00000145675	PIK3R1	-0.0216393396456185	2.23230121664592e-05	0.000467670315291754
ENSG00000185818	NAT8L	-0.0413795550111035	2.26654296954908e-05	0.000474389180341158
ENSG00000114923	SLC4A3	-0.0387568523266699	2.27243172635064e-05	0.000475166561267826
ENSG00000229512	AC068580.5	0.0367666506612904	2.31329664895585e-05	0.000483248996905682
ENSG00000065883	CDK13	-0.0123851293560312	2.32268477944787e-05	0.000484746753731761
ENSG00000264469	RP11-173M1.8	0.0265071053976177	2.32667563612465e-05	0.000485116310352669
ENSG00000143507	DUSP10	-0.0231191573056508	2.33158656205081e-05	0.000485676815704217
ENSG00000116005	PCYOX1	-0.0208346201512177	2.34659476922265e-05	0.000488337545736039
ENSG00000179639	FCER1A	-0.0398571359295948	2.35042824444879e-05	0.0004886699102707
ENSG00000140264	SERF2	0.018151200248897	2.36334809321962e-05	0.00049088896563633
ENSG00000182606	TRAK1	-0.0170342330741764	2.37594607543811e-05	0.000493037015141482
ENSG00000116717	GADD45A	0.0342698363002138	2.3997778866277e-05	0.000497509929797931
ENSG00000166794	PPIB	0.0196640968840523	2.40926467461769e-05	0.000499003245545697
ENSG00000204822	MRPL53	0.0191607596829836	2.4167283737665e-05	0.000500075110749733
ENSG00000245719	RP11-34F13.2	0.0331543158547339	2.42629381123785e-05	0.000501579433011903
ENSG00000229677	RP11-383F6.1	0.0403549187774931	2.44199528818489e-05	0.000504348195105179
ENSG00000111640	GAPDH	0.0206971197574305	2.45028858507627e-05	0.000505583152714841
ENSG00000166736	HTR3A	-0.040739325414601	2.45973434822805e-05	0.000507053351350293
ENSG00000174231	PRPF8	-0.0215215482096914	2.46418938308655e-05	0.000507492952024734
ENSG00000167774	NDUFA7	0.0206490418291585	2.47510044760957e-05	0.000509260074206372
ENSG00000065518	NDUFB4	0.0171200882745136	2.48872431779828e-05	0.000511108924572764
ENSG00000107077	KDM4C	-0.015531950480261	2.48876433913972e-05	0.000511108924572764
ENSG00000182853	VMO1	-0.0411188597638215	2.50845095182432e-05	0.00051466818543017
ENSG00000085511	MAP3K4	-0.0185659875447472	2.51961699167583e-05	0.000515990167620511
ENSG00000126216	TUBGCP3	-0.0169757150872549	2.5176714540075e-05	0.000515990167620511
ENSG00000223350	IGLV9-49	0.0410010421972655	2.52999274839499e-05	0.000517145664594751
ENSG00000242125	SNHG3	0.0186758390488566	2.52814099923536e-05	0.000517145664594751
ENSG00000124177	CHD6	-0.0190238972448219	2.53528529005839e-05	0.000517743167037999
ENSG00000169715	MT1E	0.0403373184108093	2.54767547712732e-05	0.000519787645664883
ENSG00000100311	PDGFB	-0.0314133347832843	2.55062542766062e-05	0.000519904069214666
ENSG00000085978	ATG16L1	-0.012562736832546	2.56822289859777e-05	0.000523003155240074
ENSG00000169976	SF3B5	0.0177034699666934	2.58804911984403e-05	0.000526549919159329
ENSG00000147206	NXF3	0.0378172296024382	2.60731349726896e-05	0.000529483338557844
ENSG00000185909	KLHDC8B	0.0371824504779106	2.60561597439829e-05	0.000529483338557844
ENSG00000143149	ALDH9A1	-0.0197079795269759	2.65987757176739e-05	0.000539656312169816
ENSG00000053254	FOXN3	-0.0191809191907018	2.67152899168973e-05	0.000541015569948214
ENSG00000211642	IGLV10-54	0.0386163017130822	2.67057789515272e-05	0.000541015569948214
ENSG00000133101	CCNA1	0.0401970567306106	2.68206671126069e-05	0.000542646663960716
ENSG00000088298	EDEM2	0.01865550240457	2.69615803747514e-05	0.000544874849341927
ENSG00000160957	RECQL4	0.028227986256469	2.69806684814409e-05	0.000544874849341927
ENSG00000250610	RP11-738E22.2	0.0232932216245788	2.70921180097326e-05	0.000546620379160357
ENSG00000240682	ISY1	0.0132418860628386	2.72818264905641e-05	0.000549940212772433
ENSG00000207567	MIR142	0.0307638143517146	2.73490875359177e-05	0.000550787937094321
ENSG00000111224	PARP11	0.0237054947875024	2.74098155367175e-05	0.000551502651282517
ENSG00000106789	CORO2A	0.024510958648831	2.75406596073007e-05	0.000553625531811526
ENSG00000163535	SGOL2	0.0379417616721929	2.7708298823587e-05	0.000556483490435846
ENSG00000122966	CIT	0.0363083471847488	2.77464891090439e-05	0.000556738781929952
ENSG00000129951	LPPR3	0.038956418359909	2.8189891371518e-05	0.000563739185146035
ENSG00000169230	PRELID1	0.0188242660449846	2.81572842744241e-05	0.000563739185146035
ENSG00000174307	PHLDA3	0.0394195288916433	2.8198568915135e-05	0.000563739185146035
ENSG00000258572	RP11-1070N10.3	0.0403151108774815	2.8153208870253e-05	0.000563739185146035
ENSG00000116990	MYCL1	-0.0288478825480093	2.83839074320984e-05	0.00056692574158938
ENSG00000187475	HIST1H1T	0.0409427810886701	2.84185569106549e-05	0.00056709944023262
ENSG00000136715	SAP130	-0.0227605601786402	2.85585911570316e-05	0.000569373882638958
ENSG00000149554	CHEK1	0.0343417069833247	2.88309400661585e-05	0.00057427973690577
ENSG00000092841	MYL6	0.0279134918758467	2.91304246466539e-05	0.00057918918012196
ENSG00000253239	IGLVI-70	0.0379930142037238	2.9110417185221e-05	0.00057918918012196
ENSG00000214975	PPIAP29	0.0258594032904394	2.92485636974505e-05	0.000581009423048174
ENSG00000154582	TCEB1	0.0202296696147427	2.94046027541384e-05	0.00058357854203513
ENSG00000176912	C18orf56	0.0370094865516652	2.9678261273466e-05	0.000588475215142019
ENSG00000152127	MGAT5	-0.0193525243991273	2.97396729683606e-05	0.000589158290146553
ENSG00000027075	PRKCH	-0.0222167849285817	2.98332812774004e-05	0.000590477381514925
ENSG00000243264	IGKV2D-29	0.0401641069001441	3.10302636317327e-05	0.000613612932685059
ENSG00000128965	CHAC1	0.0403219364037652	3.1215230308965e-05	0.00061671247511862
ENSG00000254006	RP11-1D12.2	0.0332220078967617	3.12437465922466e-05	0.000616718253646956
ENSG00000163508	EOMES	-0.0323326316452715	3.14067635815431e-05	0.000619376526191605
ENSG00000255835	RP4-559A3.7	-0.0154795715418818	3.2044086254623e-05	0.00063137540915218
ENSG00000069702	TGFBR3	-0.0330189221062073	3.21308883643399e-05	0.000632345307040215
ENSG00000131473	ACLY	-0.0193332690979348	3.21511892417592e-05	0.000632345307040215
ENSG00000102524	TNFSF13B	0.0347931715524104	3.23793387336179e-05	0.000636259829737666
ENSG00000100129	EIF3L	-0.0202570250708273	3.2570040404233e-05	0.000639432122976546
ENSG00000069248	NUP133	-0.0190539733865964	3.26064544149691e-05	0.000639572383681769
ENSG00000092067	CEBPE	0.0372307373556479	3.26585075019599e-05	0.000640018876614643
ENSG00000197646	PDCD1LG2	0.0404638769879594	3.27962494443702e-05	0.000642142335671087
ENSG00000139651	ZNF740	-0.0114398746738075	3.28398724630521e-05	0.000642420817538183
ENSG00000187051	RPS19BP1	0.0158453951803893	3.28995751518344e-05	0.000643013073920155
ENSG00000092529	CAPN3	0.0212248884987193	3.29953755667355e-05	0.000644309161312544
ENSG00000144848	ATG3	0.0245048392763865	3.31561926961232e-05	0.000646871398752668
ENSG00000165409	TSHR	0.0405995979866794	3.35946663249561e-05	0.000654841261254787
ENSG00000134690	CDCA8	0.0317045089861315	3.36793043014287e-05	0.00065532188627829
ENSG00000188763	FZD9	0.0394768848208237	3.36547563558864e-05	0.00065532188627829
ENSG00000198589	LRBA	-0.0241153557606448	3.42137370706523e-05	0.000665128441931337
ENSG00000127074	RGS13	0.0335552264418519	3.44382230499918e-05	0.000668897432769219
ENSG00000121316	PLBD1	0.0296282648132309	3.4616566841877e-05	0.00067154188440824
ENSG00000211965	IGHV3-49	0.0404908701506661	3.46358383473565e-05	0.00067154188440824
ENSG00000180061	TMEM150B	0.0307898357185332	3.47075369925037e-05	0.000672335452857446
ENSG00000244617	ASPRV1	0.034345923358485	3.48203272056683e-05	0.000673922913880476
ENSG00000138172	CALHM2	-0.0228120949123233	3.4906009564039e-05	0.000674983376091873
ENSG00000204852	TCTN1	-0.023308446617273	3.56720959756398e-05	0.00068918741747454
ENSG00000131503	ANKHD1	-0.0137726476753298	3.61659632650432e-05	0.00069749555454939
ENSG00000179899	PHC1P1	-0.0250797596066885	3.61509311081215e-05	0.00069749555454939
ENSG00000163485	ADORA1	-0.0401515803622878	3.65964584141006e-05	0.00070455437251675
ENSG00000175215	CTDSP2	-0.0219816911024561	3.65736314450096e-05	0.00070455437251675
ENSG00000158485	CD1B	-0.0404862850153629	3.66721745553959e-05	0.000705390568846793
ENSG00000020577	SAMD4A	0.0361413457533374	3.67184275288058e-05	0.000705659067662212
ENSG00000257309	RP11-603J24.18	0.0325899503497324	3.69256250392257e-05	0.000709017427708366
ENSG00000141720	PIP4K2B	-0.0107893648395958	3.71029581579822e-05	0.000711172577815849
ENSG00000162434	JAK1	-0.022407822976767	3.70920652165609e-05	0.000711172577815849
ENSG00000117143	UAP1	0.0276318906867971	3.73732054453013e-05	0.000715724725841611
ENSG00000228278	ORM2	0.0386878513925133	3.77217528717363e-05	0.0007217670945712
ENSG00000130558	OLFM1	-0.0399421570164509	3.77735646598196e-05	0.000722126125443322
ENSG00000149658	YTHDF1	-0.0101710252804692	3.78868222538996e-05	0.000723026159886427
ENSG00000214026	MRPL23	0.0191306242183875	3.78756330001468e-05	0.000723026159886427
ENSG00000105186	ANKRD27	-0.0119359133174017	3.82385324260728e-05	0.000729101371764501
ENSG00000183648	NDUFB1	0.0190698381266785	3.83474927770915e-05	0.00073054146876393
ENSG00000116641	DOCK7	-0.0277878554136662	3.86655108836531e-05	0.000735958256375177
ENSG00000102897	LYRM1	0.0234639307282732	3.88341518435473e-05	0.000737882653855089
ENSG00000158158	CNNM4	-0.0164092537187839	3.88178160030576e-05	0.000737882653855089
ENSG00000145687	SSBP2	-0.0162718264576927	3.90024434662749e-05	0.000740436483215962
ENSG00000145833	DDX46	-0.0144354669772687	3.93519521302811e-05	0.000745136306507154
ENSG00000156453	PCDH1	-0.0397294608093444	3.93523087139836e-05	0.000745136306507154
ENSG00000186660	ZFP91	-0.0122041529263662	3.92847269117272e-05	0.000745136306507154
ENSG00000185989	RASA3	-0.0171264110687383	3.94531835901504e-05	0.000746104781498277
ENSG00000231475	IGHV4-31	0.039778288312743	3.94717462547256e-05	0.000746104781498277
ENSG00000153037	SRP19	0.019304958743123	4.02139312395372e-05	0.00075947676016865
ENSG00000099203	TMED1	0.0161403793863007	4.03984694516725e-05	0.000762303070801809
ENSG00000049618	ARID1B	-0.0163626092678243	4.05038646384442e-05	0.000763632395353447
ENSG00000112304	ACOT13	0.0151530215675444	4.06419166827292e-05	0.000765574587443375
ENSG00000100433	KCNK10	-0.0400004300589368	4.07129484604058e-05	0.000766252055821127
ENSG00000251593	MSNP1	-0.0288677305190538	4.10338551661477e-05	0.000771627168016776
ENSG00000168779	SHOX2	0.0359889683641976	4.15507222908833e-05	0.00078067483471891
ENSG00000134909	ARHGAP32	-0.0285563948732138	4.17575893544506e-05	0.000783887530055069
ENSG00000127804	METTL16	-0.0185109159417467	4.24055122416796e-05	0.000795213978814125
ENSG00000259884	RP11-1100L3.8	-0.0373614430964047	4.24337329777708e-05	0.000795213978814125
ENSG00000115339	GALNT3	0.0288106589296204	4.24725380090737e-05	0.000795259149988234
ENSG00000066405	CLDN18	0.0325046373764753	4.2717403740004e-05	0.000798475610883513
ENSG00000135363	LMO2	0.0272799727523272	4.27167166964324e-05	0.000798475610883513
ENSG00000124785	NRN1	0.0399770706710572	4.28339699499251e-05	0.000799970151603259
ENSG00000175800	OR52B3P	0.0399656935527795	4.29170414363644e-05	0.00080083712418958
ENSG00000126432	PRDX5	0.0188634419824404	4.30403329194352e-05	0.000802452486879334
ENSG00000149557	FEZ1	-0.0387107430762564	4.34175011974889e-05	0.00080810546734781
ENSG00000164713	BRI3	0.0262179775979954	4.33851323212478e-05	0.00080810546734781
ENSG00000180098	TRNAU1AP	0.0127834484467523	4.35310606334418e-05	0.000809529536937308
ENSG00000161640	SIGLEC11	0.0397055806164422	4.36322117126611e-05	0.00081072062766442
ENSG00000253234	IGLV2-5	0.0371228218173059	4.3707073388207e-05	0.000811421631780553
ENSG00000234506	RP11-274B18.2	0.0369312724298851	4.39251011358897e-05	0.000814777066995182
ENSG00000215284	RP11-198M15.1	0.0391972505417265	4.40320194814456e-05	0.000816067563773594
ENSG00000091651	ORC6	0.0339668126779125	4.42924664862304e-05	0.000818830367202527
ENSG00000163590	PPM1L	-0.0252860015950969	4.42935103214217e-05	0.000818830367202527
ENSG00000211679	IGLC3	0.0399323116061098	4.42284338268123e-05	0.000818830367202527
ENSG00000187193	MT1X	0.0242567711790692	4.46487240464947e-05	0.000824699297666912
ENSG00000179294	C17orf96	0.0356045208731534	4.5413545116386e-05	0.000838117714812626
ENSG00000156928	MALSU1	0.0151711796214279	4.55993135652251e-05	0.000840835949969395
ENSG00000131788	PIAS3	-0.0145222721295348	4.60642409954206e-05	0.000848692858339743
ENSG00000225131	PSME2P2	0.0289777697594241	4.62133028634496e-05	0.00085072188784266
ENSG00000171311	EXOSC1	0.0139372611232854	4.64281471294516e-05	0.000853957443540108
ENSG00000198216	CACNA1E	0.0362536559609891	4.6706975702279e-05	0.000858363436560553
ENSG00000111786	SRSF9	0.00742860579135377	4.67514457132577e-05	0.000858458689311255
ENSG00000138495	COX17	0.0228787001579703	4.69315169912504e-05	0.000860823915783594
ENSG00000198894	KIAA1737	-0.0195888359755008	4.69590457010683e-05	0.000860823915783594
ENSG00000062582	MRPS24	0.0204849109863938	4.73473164649738e-05	0.000867213924623757
ENSG00000173473	SMARCC1	-0.0131774254753855	4.76909321577645e-05	0.000872752595298659
ENSG00000187741	FANCA	0.0170929069613712	4.77295936745182e-05	0.000872752595298659
ENSG00000010810	FYN	-0.0166728708253874	4.80141874208619e-05	0.00087722241583048
ENSG00000124657	OR2B6	0.0397017290629928	4.8380542579072e-05	0.000883177306512366
ENSG00000122705	CLTA	0.0141200657980478	4.88378787381128e-05	0.000890781709771705
ENSG00000239975	IGKV1D-33	0.0352644903823566	4.91896247972918e-05	0.000896449117135631
ENSG00000110925	CSRNP2	-0.012028081024759	4.93926101885149e-05	0.000899398271024367
ENSG00000090621	PABPC4	-0.0155655691288226	4.96635845396993e-05	0.000903579505226452
ENSG00000143437	ARNT	-0.0152168608834125	4.97380969480195e-05	0.000904182326465202
ENSG00000132170	PPARG	0.0395175640674926	4.99561136431652e-05	0.000907390722540982
ENSG00000123358	NR4A1	-0.0359319604751067	5.10299399990974e-05	0.000926125597109865
ENSG00000171786	NHLH1	0.0308941587789965	5.14673636614283e-05	0.000932831761943039
ENSG00000234036	RP11-123J14.2	0.0391086761824066	5.14848338704547e-05	0.000932831761943039
ENSG00000254788	CKLF-CMTM1	0.0284065246861028	5.16844483686083e-05	0.00093567264399541
ENSG00000179165	PXT1	0.039048555588223	5.1884142540639e-05	0.000938510263787669
ENSG00000119421	NDUFA8	0.0189285119589585	5.25948484987134e-05	0.000950579019475092
ENSG00000175928	LRRN1	0.037069884361734	5.26751840146985e-05	0.000951244170169568
ENSG00000254996	ANKHD1-EIF4EBP3	-0.0136175499833272	5.28356968523259e-05	0.000953354923138046
ENSG00000185897	FFAR3	0.0394714153990496	5.31621459060999e-05	0.000957962633009314
ENSG00000259827	RP11-343H19.2	0.0273215132761679	5.3178741194467e-05	0.000957962633009314
ENSG00000138297	TIMM23	0.0176467516547541	5.33070573476397e-05	0.000959483121996109
ENSG00000159352	PSMD4	0.0140802662459692	5.34183686563945e-05	0.000960695286840227
ENSG00000168890	TMEM150A	-0.0171840095208672	5.36620824147607e-05	0.000963689810972107
ENSG00000223907	RP11-439L8.4	-0.0395289107744021	5.36730813213608e-05	0.000963689810972107
ENSG00000120539	MASTL	0.0248762619317827	5.38202590201877e-05	0.00096553898181455
ENSG00000103528	SYT17	-0.0378353642236919	5.43339313248435e-05	0.000973954662329086
ENSG00000145391	SETD7	-0.0226841535588961	5.45051899137215e-05	0.000976223692462893
ENSG00000106100	NOD1	0.0170114477725516	5.45899736239825e-05	0.000976941452627062
ENSG00000004399	PLXND1	-0.0274893226611122	5.4980933483882e-05	0.000983132878523981
ENSG00000161036	LRWD1	0.0273986321701902	5.53598859591277e-05	0.000988432761380845
ENSG00000211974	IGHV2-70	0.0374738046258676	5.53677955210358e-05	0.000988432761380845
ENSG00000129355	CDKN2D	0.0244601192665064	5.55070105491209e-05	0.000990109132660278
ENSG00000184012	TMPRSS2	0.0301090983125435	5.56584595102821e-05	0.000992000814648592
ENSG00000013523	ANGEL1	-0.0155661210725618	5.65696893012163e-05	0.00100741995185076
ENSG00000181029	TRAPPC5	0.0189796072792332	5.67822396562518e-05	0.00101038169277586
ENSG00000130054	FAM155B	0.0387203904902224	5.684867424481e-05	0.00101074074932738
ENSG00000133328	HRASLS2	0.0362802117875348	5.70467458971879e-05	0.00101343775983695
ENSG00000135404	CD63	0.0219563948858434	5.73141577625454e-05	0.0010173612195527
ENSG00000007341	ST7L	0.0152707299166852	5.7469980330211e-05	0.00101929913976903
ENSG00000169252	ADRB2	-0.0223019078594481	5.7528734556434e-05	0.00101951368920733
ENSG00000268758	EMR4P	-0.0358009953409015	5.78591288727906e-05	0.0010245379457045
ENSG00000196684	HSH2D	0.0307192900642802	5.80994184536125e-05	0.00102795983208898
ENSG00000102007	PLP2	0.0237701808704669	5.81553654454274e-05	0.00102811722520068
ENSG00000163531	NFASC	0.0392514266082509	5.87492062653942e-05	0.00103777599523454
ENSG00000112695	COX7A2	0.0311485692794439	5.88752253872755e-05	0.00103916199510287
ENSG00000067221	STOML1	0.0224142105501601	5.90945215055436e-05	0.00104219079049042
ENSG00000198938	MT-CO3	-0.0231893245166847	6.01459522514064e-05	0.00105987838923023
ENSG00000233975	RP11-288L9.1	0.027679981012129	6.06761803336637e-05	0.00106836036782505
ENSG00000233488	AC108463.3	0.0310937352996195	6.09007948865521e-05	0.00107145190746059
ENSG00000164054	SHISA5	0.0324561258008285	6.09855942467463e-05	0.00107208062742209
ENSG00000110108	TMEM109	-0.0185859564583984	6.10694858101628e-05	0.00107269239102722
ENSG00000068400	GRIPAP1	0.0159122113486841	6.13375467417724e-05	0.00107653552920038
ENSG00000211966	IGHV5-51	0.03918807067332	6.14208685256798e-05	0.00107713274330227
ENSG00000003393	ALS2	-0.0168509794908726	6.1776816579413e-05	0.00108242149843847
ENSG00000157734	SNX22	0.0191576536202589	6.18710563154843e-05	0.00108242149843847
ENSG00000166170	BAG5	-0.012127838060327	6.1858526226822e-05	0.00108242149843847
ENSG00000249934	RP11-466G12.3	0.0348350735824483	6.22403630480088e-05	0.00108801133836963
ENSG00000211946	IGHV3-20	0.0352535157753914	6.23635620748159e-05	0.00108929352110056
ENSG00000234290	AC116366.6	0.0298191048111951	6.31377576426928e-05	0.00110193541713297
ENSG00000103479	RBL2	-0.0190777968916932	6.32745116515472e-05	0.00110307649486389
ENSG00000211668	IGLV2-11	0.039122647864728	6.33990524997106e-05	0.00110307649486389
ENSG00000230454	U73166.2	0.0317349730186138	6.33109674430532e-05	0.00110307649486389
ENSG00000266777	SH3GL1P1	0.0261109180329419	6.34050651022399e-05	0.00110307649486389
ENSG00000132465	IGJ	0.0390479482955194	6.38031201365651e-05	0.00110911851877811
ENSG00000088930	XRN2	-0.0199659282376039	6.41123609956103e-05	0.0011136082671821
ENSG00000121060	TRIM25	0.0311577360717428	6.43171343392854e-05	0.00111627776207127
ENSG00000140284	SLC27A2	0.0369872113125793	6.45423572550951e-05	0.0011192976574453
ENSG00000067141	NEO1	-0.030325830279179	6.48211376908758e-05	0.00112324082449114
ENSG00000125484	GTF3C4	-0.0173876580679653	6.52117617840498e-05	0.00112911426841781
ENSG00000154589	LY96	0.0352242087902312	6.54003530216161e-05	0.00113148306720137
ENSG00000116670	MAD2L2	0.0162263322029493	6.58093328867049e-05	0.00113675868214023
ENSG00000233609	RP11-62H7.2	-0.0306663620789835	6.5787499942666e-05	0.00113675868214023
ENSG00000198829	SUCNR1	0.0383935336123046	6.61273564169188e-05	0.00114134981442819
ENSG00000197265	GTF2E2	0.0146110571315162	6.620671373935e-05	0.00114181760214565
ENSG00000158042	MRPL17	0.0238459189404118	6.6418034467332e-05	0.00114455873118744
ENSG00000141448	GATA6	-0.0387891997630265	6.66365876794289e-05	0.00114651659636473
ENSG00000167074	TEF	-0.0220645146808633	6.66345067927123e-05	0.00114651659636473
ENSG00000129810	SGOL1	0.0308978888625947	6.67643435220465e-05	0.00114690854583352
ENSG00000243650	Metazoa_SRP	0.0338003854265349	6.67596698832131e-05	0.00114690854583352
ENSG00000086061	DNAJA1	0.0287808735069931	6.71155541546418e-05	0.00115113184759268
ENSG00000135966	TGFBRAP1	-0.0128322119324901	6.70916899660934e-05	0.00115113184759268
ENSG00000126267	COX6B1	0.0141561510768705	6.73061764725326e-05	0.00115349589184416
ENSG00000117020	AKT3	-0.0230132688692683	6.81835471057632e-05	0.00116670218309165
ENSG00000227017	AC007036.6	0.0383985483690046	6.81581732741041e-05	0.00116670218309165
ENSG00000138744	NAAA	-0.0253917051882329	6.82748337429088e-05	0.00116735007207848
ENSG00000147324	MFHAS1	-0.0213274803794255	6.84371484525869e-05	0.00116901400438915
ENSG00000172460	PRSS30P	-0.0365184654625368	6.84791508680661e-05	0.00116901400438915
ENSG00000181104	F2R	-0.0317587257802989	6.85641716887557e-05	0.00116955169053162
ENSG00000151014	CCRN4L	0.0267599623717916	6.86416309704347e-05	0.00116995965548749
ENSG00000129467	ADCY4	0.0288683693358593	6.91635894789332e-05	0.00117793732946545
ENSG00000142252	GEMIN7	0.0175691651487151	6.9350070353415e-05	0.0011801934480471
ENSG00000164082	GRM2	-0.0349401285990207	6.99604272969694e-05	0.00118965392752224
ENSG00000120051	CCDC147	0.0338875158691377	7.02759224668291e-05	0.00119408956595854
ENSG00000235865	GSN-AS1	0.0295858466490016	7.07077040385056e-05	0.00120049265030722
ENSG00000156853	ZNF689	-0.0135583075674948	7.11835049431985e-05	0.00120763258269707
ENSG00000116127	ALMS1	-0.021037740157465	7.18802125269815e-05	0.00121832848487941
ENSG00000214548	MEG3	-0.0384609201623338	7.19254837533496e-05	0.00121832848487941
ENSG00000260539	RP11-252A24.7	-0.0212927696072339	7.19957285012882e-05	0.00121857371299895
ENSG00000163016	ALMS1P	0.0377578527131786	7.2393033303847e-05	0.00122434997733929
ENSG00000100426	ZBED4	-0.0170432381193584	7.26951976655004e-05	0.00122850948506485
ENSG00000011114	BTBD7	-0.0158275424131224	7.2881587649119e-05	0.00123070755156175
ENSG00000262355	SAMD4A	0.0379836566225592	7.29958920081868e-05	0.00123168589673428
ENSG00000110851	PRDM4	-0.0115359072122476	7.35854619326392e-05	0.00124067587090285
ENSG00000211665	IGLV3-16	0.0376662255837874	7.37025328588549e-05	0.00124073501194055
ENSG00000256329	SCARNA10	0.0367062675934636	7.37012208649085e-05	0.00124073501194055
ENSG00000183309	ZNF623	-0.016038027596977	7.37763008165513e-05	0.0012410207460681
ENSG00000163399	ATP1A1	-0.0188626948880376	7.41873555798971e-05	0.00124697531290487
ENSG00000259529	RNF31	0.0258406545488656	7.46294025504814e-05	0.00125344125682596
ENSG00000007202	KIAA0100	-0.0138520295988083	7.47814926566503e-05	0.00125503102614475
ENSG00000204421	LY6G6C	0.0387150537029129	7.5426140143384e-05	0.00126390842658979
ENSG00000261015	RP1-90J20.11	0.0322721925138381	7.53836286631476e-05	0.00126390842658979
ENSG00000092853	CLSPN	0.0362868448081009	7.54929322543832e-05	0.0012639634038656
ENSG00000211964	IGHV3-48	0.0376329277440793	7.55451103129592e-05	0.0012639634038656
ENSG00000089486	CDIP1	-0.0198199049233093	7.5620663252221e-05	0.00126425945885561
ENSG00000165943	MOAP1	-0.0144747679848365	7.62113365074089e-05	0.00127316048472736
ENSG00000160446	ZDHHC12	0.0200368002638359	7.6337233730832e-05	0.0012742894532104
ENSG00000169660	HEXDC	0.0179302475169241	7.77269444869719e-05	0.00129649730075177
ENSG00000185222	WBP5	0.0386351575035172	7.79031956273562e-05	0.00129844601651667
ENSG00000114698	PLSCR4	0.0342486174142839	7.81775880927354e-05	0.0013014774766419
ENSG00000116337	AMPD2	-0.0275168066054974	7.82041978321733e-05	0.0013014774766419
ENSG00000248477	RP11-848G14.2	0.037777061979444	7.85760208908338e-05	0.00130667019215039
ENSG00000075702	WDR62	0.0291408957868977	7.86660240320169e-05	0.00130717208450464
ENSG00000228549	RP11-108M9.3	-0.0386208938669319	7.96122634853996e-05	0.00132189025031874
ENSG00000160993	ALKBH4	0.0238616398709785	7.9827271164148e-05	0.00132445383614867
ENSG00000108100	CCNY	-0.0179763614733617	7.99698064774749e-05	0.00132581201922557
ENSG00000211637	IGLV4-69	0.0385462145780753	8.02316034887316e-05	0.00132914387250362
ENSG00000111249	CUX2	-0.0363664440601982	8.06571656166211e-05	0.00133518161052181
ENSG00000162873	KLHDC8A	0.0383415460813352	8.08736244120751e-05	0.00133775137549451
ENSG00000254554	RP11-351I24.1	0.0377135460213429	8.15328594566376e-05	0.00134763578818985
ENSG00000199916	RMRP	0.0350959314896546	8.25873906912843e-05	0.00136403406953534
ENSG00000060656	PTPRU	0.0383175643989137	8.27300853218611e-05	0.00136535883260422
ENSG00000148926	ADM	0.0323342653159664	8.28183119541057e-05	0.00136578334679937
ENSG00000267288	RP13-890H12.2	0.0376566262691197	8.38770551212652e-05	0.00138220024996589
ENSG00000114812	VIPR1	-0.0239246466359011	8.41812063596278e-05	0.00138616694812677
ENSG00000109107	ALDOC	-0.0220621691830932	8.43119379742018e-05	0.00138727421436317
ENSG00000105755	ETHE1	0.0186321885799484	8.45473963135541e-05	0.00138905650890787
ENSG00000167986	DDB1	-0.0182397761541158	8.44855634300554e-05	0.00138905650890787
ENSG00000142409	ZNF787	0.0213043140507861	8.49987909886916e-05	0.00139542342741841
ENSG00000165264	NDUFB6	0.0213157724257259	8.51198604269676e-05	0.00139636191455681
ENSG00000254911	SCARNA9	0.0249451381014086	8.6008726971959e-05	0.00140988499104597
ENSG00000134571	MYBPC3	0.0300272094456238	8.61518043439536e-05	0.00141011466420954
ENSG00000168763	CNNM3	-0.0171189741445753	8.61161002667549e-05	0.00141011466420954
ENSG00000157240	FZD1	-0.0300370751578148	8.67720774576865e-05	0.0014192040902155
ENSG00000106588	PSMA2	0.0290638436903976	8.71311733778716e-05	0.00142401142070297
ENSG00000238061	RP4-635A23.4	0.035007056833145	8.72199915453549e-05	0.00142439763472164
ENSG00000251546	IGKV1D-39	0.0372456975718366	8.73333653785974e-05	0.00142518399319472
ENSG00000107281	NPDC1	0.0318425839612121	8.75454764133479e-05	0.00142545171766622
ENSG00000210164	J01415.15	-0.0383451994985704	8.74943071030078e-05	0.00142545171766622
ENSG00000252678	RPPH1	0.0363175744868279	8.7459466787312e-05	0.00142545171766622
ENSG00000114302	PRKAR2A	-0.013042506256746	8.77117971621413e-05	0.0014270964108637
ENSG00000183495	EP400	-0.0154697037922893	8.80850219175109e-05	0.0014321025401187
ENSG00000148158	SNX30	-0.0201138466263949	8.93456976470091e-05	0.00145151883961695
ENSG00000120008	WDR11	-0.0184121001277749	8.94846952219947e-05	0.00145269693558381
ENSG00000150687	PRSS23	-0.0360266500987377	8.99133263203687e-05	0.00145857171004185
ENSG00000244071	RPL9P33	0.0361358977281068	9.00950833437803e-05	0.00146043595411346
ENSG00000232815	RP11-764K9.2	0.0313925936602498	9.14273733068016e-05	0.00148093367985687
ENSG00000110871	COQ5	0.0254971049897977	9.24548573373354e-05	0.0014963675171561
ENSG00000153093	ACOXL	0.0377619132334669	9.2517162403455e-05	0.0014963675171561
ENSG00000168404	MLKL	0.0244588679245084	9.36411263273776e-05	0.00151342622143456
ENSG00000083290	ULK2	-0.0181484094718559	9.39267934000704e-05	0.0015169211844678
ENSG00000156475	PPP2R2B	-0.0315932151505549	9.40952920564348e-05	0.00151852010836422
ENSG00000178449	COX14	0.0232683858413848	9.47730665710108e-05	0.00152832935619421
ENSG00000132466	ANKRD17	-0.0162090305138482	9.56979734721338e-05	0.00154210650320029
ENSG00000103121	CMC2	0.0250188346576202	9.65170074541113e-05	0.00155415853344126
ENSG00000088340	FER1L4	0.0375328535009473	9.66809015349947e-05	0.00155511766577508
ENSG00000255557	RP11-770G2.2	0.0369569556469899	9.6786188144255e-05	0.00155511766577508
ENSG00000267068	CTD-2562J15.1	0.0298107230939556	9.67900794221823e-05	0.00155511766577508
ENSG00000110063	DCPS	0.0173747341816017	9.68870929892189e-05	0.00155553260022588
ENSG00000095485	CWF19L1	0.0129533060711251	9.71583570913695e-05	0.00155874248223459
ENSG00000242525	OR7E100P	0.0373605777617724	9.74275751222807e-05	0.00156191485252895
ENSG00000164024	METAP1	-0.0155039552782464	9.81200219290069e-05	0.00157093812915182
ENSG00000170915	PAQR8	-0.0198326237835831	9.81342065027792e-05	0.00157093812915182
ENSG00000130764	LRRC47	-0.0115488070474013	9.85298796721384e-05	0.00157611742365732
ENSG00000245556	CTD-2037K23.2	0.0189123650823751	9.91792949762232e-05	0.00158534511669748
ENSG00000196586	MYO6	-0.0323705331332357	9.99676355660572e-05	0.00159677836604818
ENSG00000198929	NOS1AP	0.0380222320229817	0.00010033195321126	0.00160142696100748
ENSG00000196690	BX284668.1	-0.0369646850431034	0.000101722304441093	0.00162243363090681
ENSG00000128165	ADM2	0.0285408586821775	0.000101905128499208	0.00162350011014235
ENSG00000180357	ZNF609	-0.0163796450920084	0.000101937767201286	0.00162350011014235
ENSG00000184840	TMED9	0.012642121083021	0.000102738938526709	0.00163506813237227
ENSG00000131475	VPS25	0.0160059395755222	0.000102850726020685	0.00163565590558806
ENSG00000067704	IARS2	-0.0185736198879976	0.000103755167547379	0.00164883939351111
ENSG00000196954	CASP4	0.0246835762543259	0.000103912292939617	0.00164900543838429
ENSG00000253719	ATXN7L3B	-0.0118217686709113	0.000103916547922528	0.00164900543838429
ENSG00000198901	PRC1	0.0298679798947098	0.0001042153974966	0.00165254764201612
ENSG00000165675	ENOX2	-0.0188829937493353	0.000104410828959477	0.00165444599245361
ENSG00000100290	BIK	0.0304948233050018	0.000104631677507751	0.00165649832506754
ENSG00000143457	GOLPH3L	0.0157035510388002	0.00010469196773229	0.00165649832506754
ENSG00000119725	ZNF410	0.0118013944415291	0.000105270616409286	0.00166444879823394
ENSG00000150093	ITGB1	-0.0230646805367544	0.000105498180750788	0.00166684074301191
ENSG00000183955	SETD8	0.014785966740237	0.00010630645756395	0.00167839769091754
ENSG00000135148	TRAFD1	0.0274945632204735	0.000106412738551023	0.00167886263543566
ENSG00000138439	FAM117B	-0.0206938492937941	0.000107065768247134	0.00168672970581697
ENSG00000169032	MAP2K1	-0.014602381718895	0.000107040143551846	0.00168672970581697
ENSG00000169764	UGP2	0.0145815094115819	0.000107245674336616	0.00168834670744192
ENSG00000119139	TJP2	-0.0259666915429047	0.00010837479787291	0.00170489395847441
ENSG00000158321	AUTS2	-0.0283765651376065	0.000108884855758523	0.0017116855994097
ENSG00000198258	UBL5	0.0217012702132155	0.000109077069794574	0.00171347451623381
ENSG00000163125	RPRD2	-0.016962007396765	0.000109317882694778	0.00171602374623822
ENSG00000242028	HYPK	0.0167296369594376	0.000110207379929781	0.00172874476586191
ENSG00000020256	ZFP64	-0.0193762420828043	0.000110909006311648	0.00173850265201996
ENSG00000096968	JAK2	0.0277523454705111	0.000111198736766065	0.00174054698930894
ENSG00000137288	MNF1	0.024562214877945	0.000111125251591853	0.00174054698930894
ENSG00000102606	ARHGEF7	-0.0115887218404681	0.000111922543599465	0.00175062240529127
ENSG00000187097	ENTPD5	-0.0145469789368603	0.000112583222762277	0.00175969670999894
ENSG00000131089	ARHGEF9	-0.0185338171509726	0.000113117832692247	0.00176678896508813
ENSG00000087258	GNAO1	-0.0351157746760582	0.000114408528437628	0.00178439739820885
ENSG00000108468	CBX1	-0.015075870340812	0.000114400206794923	0.00178439739820885
ENSG00000100567	PSMA3	0.0222893886706019	0.00011523539008102	0.00179601177507873
ENSG00000238015	RP4-641G12.3	0.0285551709434396	0.000116079651639172	0.0018078805901408
ENSG00000213588	ZBTB9	-0.0175771673828305	0.000116747229793806	0.00181698270528808
ENSG00000184076	UQCR10	0.0172586848931898	0.000117051935788411	0.00182042836221536
ENSG00000151062	CACNA2D4	-0.019513350660767	0.000117718775170551	0.00182949712393437
ENSG00000103363	TCEB2	0.0174681349196972	0.000118279492460435	0.00183690489676827
ENSG00000139343	SNRPF	0.0210889472142512	0.000118627194300804	0.00184099632291681
ENSG00000179840	C1orf200	0.0249302778347035	0.00011984836206753	0.00185862779243265
ENSG00000156299	TIAM1	-0.0232329380254041	0.000121020115662156	0.00187546847328636
ENSG00000168675	LDLRAD4	-0.017075442944127	0.000121386114212694	0.00187980721591891
ENSG00000166974	MAPRE2	-0.0138605099142993	0.000121578776256198	0.00188145739374942
ENSG00000170234	PWWP2A	-0.0178607945137737	0.000122160585382092	0.00188912310770283
ENSG00000211943	IGHV3-15	0.0375745272706032	0.000122377263632817	0.00189113549338097
ENSG00000181036	FCRL6	-0.03404062371827	0.000122569600578359	0.00189276914645775
ENSG00000122783	C7orf49	0.0289058903419175	0.000122912340821038	0.00189672144016985
ENSG00000081177	EXD2	-0.0202238136142467	0.000123403395061154	0.00190295524734035
ENSG00000262519	RP11-141J13.4	0.0365134633306857	0.000124068767501513	0.00191186645886853
ENSG00000111452	GPR133	-0.0309434425069271	0.000124238753312319	0.00191313671502994
ENSG00000113758	DBN1	0.0269471690950876	0.000125395969264143	0.00192947802811904
ENSG00000137414	FAM8A1	0.0304910845780327	0.000125564860005733	0.00192947802811904
ENSG00000158488	CD1E	-0.0348589406924855	0.000125482535021995	0.00192947802811904
ENSG00000149196	C11orf73	0.0188198179774861	0.000126009024773366	0.00193384352811271
ENSG00000260946	RP11-407G23.3	-0.0164180164062796	0.000126025956891332	0.00193384352811271
ENSG00000111775	COX6A1	0.0204144271270872	0.000126364926159016	0.00193632538674661
ENSG00000151846	PABPC3	-0.0198935616265682	0.000126363788085137	0.00193632538674661
ENSG00000127774	EMC6	0.0195964818212602	0.000127238485347954	0.00194834487970437
ENSG00000254429	CTD-2562J17.7	-0.0243191280915177	0.000127491982336682	0.0019508594580104
ENSG00000185482	STAC3	0.0271247258939356	0.000127879870131965	0.00195542550192692
ENSG00000110367	DDX6	-0.0196083983717284	0.000128026042851005	0.00195629165198414
ENSG00000112029	FBXO5	0.0270054700862237	0.000128578011993042	0.00196035717518922
ENSG00000178607	ERN1	-0.0298167971091762	0.000128639112378737	0.00196035717518922
ENSG00000182670	TTC3	-0.0184545627930738	0.000128650962849359	0.00196035717518922
ENSG00000205786	AC002511.1	0.0360040592055428	0.00012853016521165	0.00196035717518922
ENSG00000267699	RP11-729L2.2	-0.0199964277327258	0.000129145034234748	0.00196651438541009
ENSG00000151689	INPP1	0.0173236936514248	0.000129371332303281	0.00196858842768732
ENSG00000177283	FZD8	-0.0370531870538007	0.000129935702284316	0.0019758002996622
ENSG00000223648	IGHV3-64	0.0337762629880503	0.000130193487084086	0.00197834345359831
ENSG00000167604	NFKBID	0.0201706985411632	0.00013063437032949	0.00198366339546191
ENSG00000138760	SCARB2	0.0233815828075321	0.000130768150161957	0.00198431586749231
ENSG00000011454	RABGAP1	-0.0121753766204105	0.000131357540115941	0.00198992043732899
ENSG00000186951	PPARA	-0.0165707887221317	0.00013141069933027	0.00198992043732899
ENSG00000260077	RP11-254F7.2	-0.0264851144118596	0.000131350167952742	0.00198992043732899
ENSG00000204397	CARD16	0.031825991816217	0.000132070030685978	0.00199851955714633
ENSG00000243754	RP11-125K10.4	0.0232328872937269	0.000133122551108393	0.00201305250122456
ENSG00000151491	EPS8	-0.0338501026387573	0.000133917680307463	0.00202367581770289
ENSG00000135052	GOLM1	-0.0229407037126594	0.000134237065220089	0.00202710028481283
ENSG00000185339	TCN2	0.0333097190570159	0.000135407957539538	0.00204336966864395
ENSG00000106245	BUD31	0.0134002279474192	0.000136463311196709	0.00205751693958633
ENSG00000109743	BST1	0.0270361475819801	0.00013653377705369	0.00205751693958633
ENSG00000120708	TGFBI	-0.0277617936426334	0.000136889740803642	0.00206145949434899
ENSG00000178927	C17orf62	0.0205717179691609	0.000137061664737489	0.00206262702216176
ENSG00000162645	GBP2	0.0278898869876741	0.000137425034913334	0.00206667201506625
ENSG00000180573	HIST1H2AC	0.0291221279490484	0.000137617449197912	0.00206814228502309
ENSG00000224126	UBE2SP2	0.0309808000701858	0.000137751165788807	0.00206872901969156
ENSG00000126768	TIMM17B	0.0155668116811883	0.000138218214753218	0.00207431745231633
ENSG00000116288	PARK7	0.0142969910119964	0.000138533312334984	0.00207761936021396
ENSG00000267003	CTC-507E2.1	0.0303448397840786	0.000138931784446417	0.00208216627019112
ENSG00000260152	RP11-69H7.4	0.0372839764022965	0.000139679994947982	0.00209194487293238
ENSG00000166595	FAM96B	0.0160994205620073	0.000140176815882718	0.00209692939928407
ENSG00000219626	FAM228B	0.019502011860542	0.000140204743597731	0.00209692939928407
ENSG00000145365	TIFA	0.0263863640556242	0.00014146877487996	0.00211316029431385
ENSG00000164626	KCNK5	0.0349687542151979	0.000141483387972229	0.00211316029431385
ENSG00000126251	GPR42	0.0328674698986066	0.000142071641264946	0.00212049688065596
ENSG00000129675	ARHGEF6	-0.0125893601317225	0.000142995203942725	0.00213282471082081
ENSG00000211632	IGKV3D-11	0.035665749412666	0.000143324768613166	0.00213628207296472
ENSG00000157800	SLC37A3	0.0289041262955494	0.000144053561722702	0.00214421960299916
ENSG00000188404	SELL	0.0280261792927214	0.000144053498123663	0.00214421960299916
ENSG00000176340	COX8A	0.0160096945457796	0.00014522124833986	0.00216012899759992
ENSG00000211654	IGLV5-37	0.033807213702471	0.000145697297432125	0.00216573581373426
ENSG00000162062	C16orf59	0.0366237068305518	0.000145814236544054	0.00216600060008438
ENSG00000186918	ZNF395	-0.0205605662693439	0.00014674388383553	0.00217832921582213
ENSG00000179833	SERTAD2	-0.0193542475598098	0.000147256113770552	0.0021844489762392
ENSG00000267339	CTD-2081K17.1	0.0326561309218225	0.000147739078132381	0.00219012659177114
ENSG00000158411	MITD1	0.0162091867767817	0.000148707094964462	0.00220298219123285
ENSG00000066294	CD84	-0.0172527626253733	0.00014922744118105	0.00220919296561458
ENSG00000211821	TRDV2	-0.0367660749957177	0.000149657498608097	0.0022140595816422
ENSG00000060491	OGFR	0.0217062061465822	0.000151053091114659	0.00223319424488932
ENSG00000101654	RNMT	-0.012402727485201	0.00015123773416331	0.0022344122577434
ENSG00000257727	CNPY2	0.0182665008217344	0.000151729645443223	0.00224016519093234
ENSG00000125977	EIF2S2	0.014594056262239	0.000153654344611675	0.00226705002303154
ENSG00000132581	SDF2	0.0149033328303081	0.000155518892865942	0.00229301169231693
ENSG00000197982	C1orf122	0.0170270696601557	0.000156318350302783	0.00230324495783284
ENSG00000266913	CTC-548K16.2	0.0347963996646881	0.000156449110795837	0.00230361827493251
ENSG00000266970	RP11-806H10.4	0.0370052927809827	0.000156777774809489	0.0023069031362708
ENSG00000075856	SART3	-0.0120887731136183	0.00015728762684989	0.00231162321703373
ENSG00000153885	KCTD15	-0.0247018442561461	0.000157310133345346	0.00231162321703373
ENSG00000196371	FUT4	0.0242773005560663	0.000157542999527969	0.00231348930288015
ENSG00000080573	COL5A3	-0.0369591976914785	0.000158640476748084	0.00232564229409921
ENSG00000168781	PPIP5K1	-0.019209983320522	0.000158689884238796	0.00232564229409921
ENSG00000204084	INPP5B	-0.0141646604348609	0.000158488283154545	0.00232564229409921
ENSG00000100220	C22orf28	0.0164796306132695	0.000159158382600606	0.00233094491836853
ENSG00000179348	GATA2	-0.0368720251436556	0.000160249123546061	0.00234534735338578
ENSG00000103175	WFDC1	0.0284785072028872	0.000160625157820319	0.00234770590202795
ENSG00000115350	POLE4	0.025727050990664	0.000160606446046588	0.00234770590202795
ENSG00000223629	DEFA8P	0.0252172610034415	0.000160825096873575	0.00234905694638001
ENSG00000213920	MDP1	0.0207876225357496	0.000161144931160734	0.00235215623967482
ENSG00000077327	SPAG6	0.0369349036665257	0.000161649413879776	0.00235655418653393
ENSG00000104320	NBN	0.0238930608805889	0.000161661925111636	0.00235655418653393
ENSG00000186318	BACE1	-0.0181841179226929	0.000161922664789614	0.00235878143221191
ENSG00000145041	VPRBP	-0.0160558236861579	0.000162809018943256	0.00237011317317061
ENSG00000129255	MPDU1	0.0160477855863817	0.000162971932916008	0.0023709052637468
ENSG00000154451	GBP5	0.0348474095550719	0.000163581753173998	0.00237819353865937
ENSG00000143575	HAX1	0.0167245295234322	0.000165118988666512	0.0023989461578138
ENSG00000145016	KIAA0226	0.0216167311773837	0.000165562176432221	0.0024037867888508
ENSG00000114544	SLC41A3	-0.0149258584119543	0.000165773468803249	0.00240525635246998
ENSG00000028116	VRK2	0.0227883492555118	0.000166604292554194	0.00241570696523006
ENSG00000100385	IL2RB	-0.0278174255431689	0.000166805201965021	0.00241701622555549
ENSG00000102174	PHEX	-0.0355898626184393	0.000167423874800628	0.00242437315325946
ENSG00000134489	HRH4	-0.0347906506895054	0.000167889023592486	0.00242949871160226
ENSG00000173110	HSPA6	0.0297775664870442	0.000168611657381344	0.00243834104926522
ENSG00000163636	PSMD6	0.0130009407363158	0.000168800873433796	0.00243946288717055
ENSG00000128050	PAICS	0.019097475095491	0.000169405264332872	0.00244657926697791
ENSG00000147140	NONO	-0.00972110178069132	0.000171589435197529	0.00247648662384492
ENSG00000162139	NEU3	-0.0175533151352725	0.000171738290574818	0.00247699893554478
ENSG00000161057	PSMC2	0.024649865484621	0.000172544146877062	0.00248698031227618
ENSG00000156958	GALK2	0.0175981484556559	0.00017329667196819	0.00249618034223923
ENSG00000229054	AC074338.4	0.0338826617945243	0.000173866075076666	0.00250273228359699
ENSG00000049246	PER3	-0.026481541356099	0.000175250329431518	0.00251933878184744
ENSG00000105639	JAK3	0.0211282761267961	0.000175234829615805	0.00251933878184744
ENSG00000118564	FBXL5	0.0231558753937798	0.000176313399259036	0.00253295469244523
ENSG00000107882	SUFU	-0.0156419244089388	0.000176475513905802	0.0025336179069354
ENSG00000250264	TAP2	0.0257546989549083	0.000177089339766429	0.00254076110521092
ENSG00000127922	SHFM1	0.0278703593294272	0.000177555489524754	0.00254577756010853
ENSG00000131558	EXOC4	-0.0165001326137893	0.000178208793112119	0.00255179576559169
ENSG00000185404	SP140L	0.0140344602985604	0.000178158482656226	0.00255179576559169
ENSG00000263203	CHTF8	-0.0133417806803664	0.000179393714426959	0.00256708058542468
ENSG00000181610	MRPS23	0.0221817871464148	0.000180792772829191	0.00258540764338394
ENSG00000100418	DESI1	0.0125643774428547	0.000181609481349704	0.00259538834334361
ENSG00000205105	COX17P1	0.0349308351401354	0.000181975281927547	0.00259891626496655
ENSG00000259803	SLC22A31	0.0365005231413836	0.000182184721876339	0.00260020794103193
ENSG00000256646	DKFZP686D09174	0.0260287476436198	0.000182549238679964	0.00260370980051951
ENSG00000138802	SEC24B	-0.015794070454364	0.000184155794069311	0.00262491079987509
ENSG00000108010	GLRX3	0.0205891905128307	0.000184634242039443	0.00263001487796863
ENSG00000184752	NDUFA12	0.0195542012167794	0.000184974074011931	0.00263313908223759
ENSG00000162745	OLFML2B	-0.03337030205664	0.000185384450689942	0.00263726278126687
ENSG00000011275	RNF216	-0.0114110324405661	0.000185613487852406	0.00263815271469016
ENSG00000115459	ELMOD3	0.0120696270758521	0.000185726942657849	0.00263815271469016
ENSG00000211625	IGKV3D-20	0.035955626028294	0.000185809209093779	0.00263815271469016
ENSG00000251230	RP11-701P16.5	0.0350806662152938	0.000186334370328781	0.00264389112081441
ENSG00000041357	PSMA4	0.0308844441836953	0.000187095864776298	0.00265125275047139
ENSG00000168026	TTC21A	0.0324501518600309	0.000187031789183223	0.00265125275047139
ENSG00000159140	SON	-0.0146077917088184	0.000188205602771163	0.00266352372160148
ENSG00000204882	GPR20	-0.0364548183461465	0.000188182429442193	0.00266352372160148
ENSG00000257433	RP1-197B17.3	0.0321624627022484	0.000189156891514071	0.00267525387474044
ENSG00000122642	FKBP9	0.029751757522787	0.000189843654783881	0.00268323007806117
ENSG00000159199	ATP5G1	0.0177299832823017	0.000190296349369912	0.00268788980612924
ENSG00000185386	MAPK11	0.0254290326928441	0.000191191409935998	0.0026987877897361
ENSG00000106153	CHCHD2	0.0197218150764733	0.000192697888823385	0.00271829668733363
ENSG00000011304	PTBP1	-0.0124380230194906	0.000193041511914251	0.00271963254470555
ENSG00000138621	PPCDC	0.0223108376020549	0.000192954185313586	0.00271963254470555
ENSG00000213626	LBH	-0.0207729571531146	0.000193670322996507	0.00272497760965658
ENSG00000243147	MRPL33	0.0147946870207942	0.000193663990035092	0.00272497760965658
ENSG00000204642	HLA-F	0.0199558480859737	0.000193909842734078	0.00272659200359224
ENSG00000102554	KLF5	0.0314966091479688	0.000194040366005956	0.00272667269298787
ENSG00000182165	TP53TG1	0.024926670861772	0.000194218566753561	0.00272742281628025
ENSG00000064490	RFXANK	0.0141830107765151	0.000195977877565293	0.00275036133762313
ENSG00000211650	IGLV5-45	0.0363730030525673	0.000196619055418966	0.00275758856223352
ENSG00000165457	FOLR2	-0.0289493321368064	0.000197351565223524	0.00276608662713227
ENSG00000062524	LTK	-0.0322695861463742	0.000198443512180183	0.00277794642977336
ENSG00000157985	AGAP1	-0.0340134285047793	0.000198451987409099	0.00277794642977336
ENSG00000261271	RP11-603B24.5	0.0362643597341772	0.000198645759791747	0.00277887867939147
ENSG00000197723	HSPB9	0.0345417571782482	0.000199242727871209	0.00278544647902353
ENSG00000140280	LYSMD2	0.022359574949816	0.000199693943110615	0.00278640635434869
ENSG00000148680	HTR7	-0.0365012540080904	0.000199441052807842	0.00278640635434869
ENSG00000185272	RBM11	0.0346604641652091	0.000199653924333546	0.00278640635434869
ENSG00000130856	ZNF236	-0.0197505723145616	0.000201165734460558	0.00280157582134969
ENSG00000168274	HIST1H2AE	0.0347434253783528	0.000201018526687239	0.00280157582134969
ENSG00000217555	CKLF	0.0261732947648696	0.00020111652883913	0.00280157582134969
ENSG00000011052	NME2	0.0212418120808737	0.000201476654693146	0.00280411871445855
ENSG00000100206	DMC1	0.0332375825162049	0.000201864240312673	0.00280772470723884
ENSG00000141034	GID4	-0.01576364445443	0.000202092775468418	0.00280911529056006
ENSG00000134330	IAH1	0.0159588353222447	0.00020321190547622	0.00282249139352382
ENSG00000163156	SCNM1	0.0146812691677151	0.000203313416017871	0.00282249139352382
ENSG00000196497	IPO4	0.0150597693027348	0.000203493741537778	0.00282320110878856
ENSG00000185155	MIXL1	0.0353796871983145	0.000203963927763605	0.00282613556471943
ENSG00000224950	RP5-1086K13.1	0.026517720351817	0.000203933433367218	0.00282613556471943
ENSG00000135387	CAPRIN1	-0.0126547685122791	0.000204252748454998	0.00282834398383407
ENSG00000180739	S1PR5	-0.0309456518202889	0.000204970283756036	0.00283648237514448
ENSG00000196968	FUT11	-0.0185278687847551	0.000206494369070898	0.00285576484719505
ENSG00000259741	ZMYND11	-0.022986346255977	0.000206751257851238	0.0028575090039895
ENSG00000174652	ZNF266	-0.0217375773035779	0.000207314473636533	0.00286348202492533
ENSG00000085563	ABCB1	-0.0298002883494265	0.000207659234454862	0.00286643204805635
ENSG00000132109	TRIM21	0.0255089646268516	0.000211429425712701	0.00291479140772759
ENSG00000188985	DHFRP1	0.0297785309874106	0.000211411299653176	0.00291479140772759
ENSG00000185112	FAM43A	-0.0207583485593063	0.00021195124986385	0.002920142976529
ENSG00000070761	C16orf80	-0.0121104137433086	0.000212100576432718	0.00292035897645326
ENSG00000137198	GMPR	0.0304511343184713	0.000212278863260427	0.00292097319968739
ENSG00000132832	RP11-445H22.3	0.0313850178623543	0.00021253836810809	0.00292270351260534
ENSG00000125779	PANK2	0.0172475970936376	0.000213072133606985	0.00292820074933726
ENSG00000213760	ATP6V1G2	0.0194271557703698	0.00021395262053139	0.00293845299260302
ENSG00000078098	FAP	0.0307044085584651	0.000214380784765399	0.00294207843500883
ENSG00000260188	CTA-331P3.1	0.0361654508523507	0.00021448587922608	0.00294207843500883
ENSG00000204839	C8orf73	0.0261491704661455	0.000215416626979015	0.00295198753425071
ENSG00000259811	RP11-863P13.3	-0.0356282998496096	0.000215478473165067	0.00295198753425071
ENSG00000164818	HEATR2	-0.0154567304480024	0.000217224029031178	0.002974036502732
ENSG00000262703	RP11-485G7.6	0.0359738379525463	0.000218047064740757	0.00298343544874782
ENSG00000205560	CPT1B	0.0212976351109309	0.000218888511249148	0.00299307438004076
ENSG00000168229	PTGDR	-0.0291641497903325	0.000219534017814327	0.00299814863953803
ENSG00000234571	RP5-998N21.4	0.0350831063893563	0.000219486979040998	0.00299814863953803
ENSG00000236824	BCYRN1	0.0351950584128486	0.000219825950170391	0.00300026036050795
ENSG00000130340	SNX9	-0.0180988664798705	0.00022096878844866	0.00301324133019505
ENSG00000204301	NOTCH4	-0.0277869146142804	0.000221052851233475	0.00301324133019505
ENSG00000172053	QARS	-0.0126096822649607	0.000221513656438518	0.0030176402162332
ENSG00000054392	HHAT	-0.0255014838876385	0.000221664602647724	0.00301781509810306
ENSG00000058056	USP13	-0.0227957127728545	0.000223295674800529	0.00303812813827295
ENSG00000135213	POM121C	-0.0163248320633475	0.000225908695238825	0.00307176782804205
ENSG00000178104	PDE4DIP	-0.0171854216792195	0.000226666971352293	0.00307824735302607
ENSG00000236383	TMEM106A-AS1	0.0272483458312949	0.000226565266194398	0.00307824735302607
ENSG00000106028	SSBP1	0.0158438621328996	0.00022697536749535	0.00308052096592602
ENSG00000187240	DYNC2H1	-0.0296835522942328	0.00022726378707093	0.0030825208015437
ENSG00000223960	AC009948.5	0.0264566546178376	0.000228999315672303	0.00310413402404186
ENSG00000176903	PNMA1	-0.0168042297036404	0.000230508466061737	0.00312265374576257
ENSG00000151366	NDUFC2	0.0141838971569295	0.00023100385461491	0.00312742579131995
ENSG00000161980	POLR3K	0.0160712997223623	0.00023219114755327	0.00314155341497616
ENSG00000173273	TNKS	-0.0144166302632319	0.000233999403546817	0.00316406000427074
ENSG00000135362	PRR5L	-0.0248482110766719	0.00023459567682128	0.00316624467833341
ENSG00000159189	C1QC	0.0359825552391276	0.000234470791674318	0.00316624467833341
ENSG00000179397	C1orf101	0.0356303266758688	0.000234582986141091	0.00316624467833341
ENSG00000128692	EIF2S2P4	0.0167244079655002	0.000235041583975903	0.00317030472312189
ENSG00000259850	RP11-45M22.1	-0.0198435850623451	0.000235965889966311	0.00318080855129788
ENSG00000245080	RP11-320N21.1	0.0357447106318944	0.000236233869031321	0.00318245762774562
ENSG00000128408	RIBC2	0.0334250792997648	0.00023676434877779	0.00318763880785181
ENSG00000254477	AP000640.10	0.0317857676892217	0.000237494528465996	0.00319550057974783
ENSG00000119969	HELLS	0.0272545451598293	0.000238315827106424	0.00320457793113998
ENSG00000010319	SEMA3G	0.0346756458578604	0.000239043064253032	0.00321238007195141
ENSG00000159374	C2orf65	0.0291383535760969	0.000240632694625595	0.00323175476967663
ENSG00000145431	PDGFC	-0.031375287156971	0.000242000493197383	0.00324812824131205
ENSG00000111412	C12orf49	-0.0126803567479622	0.00024228594038132	0.0032499632187061
ENSG00000128908	INO80	-0.012292014220461	0.000242796975240986	0.00325482006502502
ENSG00000251139	RP11-701P16.2	0.0351468441509451	0.000243157977589429	0.00325566480901141
ENSG00000267059	UQCR11	0.0168774542097863	0.00024309326787649	0.00325566480901141
ENSG00000025293	PHF20	-0.0156146651349195	0.000243384595220815	0.00325670348448868
ENSG00000157445	CACNA2D3	-0.0288663002905715	0.000244326107559847	0.0032673009646819
ENSG00000077585	GPR137B	-0.0217152254438281	0.000244762174653036	0.00326959128509763
ENSG00000235169	SMIM1	0.0357932069776691	0.000244796638250868	0.00326959128509763
ENSG00000088881	EBF4	-0.032926641274287	0.000244999214862373	0.00327029801096989
ENSG00000261327	RP11-863P13.7	-0.0357276517259444	0.000246446334141513	0.00328760613389878
ENSG00000142621	FHAD1	-0.0342801403228561	0.00024726400174302	0.00329541767045089
ENSG00000198912	C1orf174	-0.0116725296371555	0.000247333530709782	0.00329541767045089
ENSG00000198830	HMGN2	0.0135561080563284	0.000247535176637375	0.00329609454278079
ENSG00000166562	SEC11C	0.0280454706546202	0.000247946926172111	0.00329956655529038
ENSG00000114650	SCAP	-0.0201177109183132	0.00024811451645268	0.0032997871570344
ENSG00000160888	IER2	0.0196374006928472	0.000249421391199009	0.00331142090093561
ENSG00000171860	C3AR1	0.0309139046298569	0.000249443906591919	0.00331142090093561
ENSG00000224512	AC021593.1	-0.0214633976966881	0.000249393849585146	0.00331142090093561
ENSG00000006744	ELAC2	-0.0164548712864663	0.000250116763772893	0.00331833722234456
ENSG00000175198	PCCA	-0.0210621065534623	0.000250759769993764	0.00332484935323649
ENSG00000179859	AC025335.1	-0.0185652528236304	0.000253811330159954	0.00335929857011674
ENSG00000211970	IGHV4-61	0.031146289539482	0.000253819135932577	0.00335929857011674
ENSG00000257322	RP11-511B23.2	0.0326696574487491	0.000253691533747519	0.00335929857011674
ENSG00000170909	OSCAR	0.0253965402707959	0.00025590987340305	0.00338491927586564
ENSG00000180425	C11orf71	0.018075910326504	0.000256271501774874	0.00338746003024642
ENSG00000198712	MT-CO2	-0.0208550479694487	0.000256412012723792	0.00338746003024642
ENSG00000091164	TXNL1	0.0122488777367923	0.00025686620170564	0.00339140989333531
ENSG00000076382	SPAG5	0.0281357874136366	0.000257866615649966	0.00339688182765439
ENSG00000111269	CREBL2	-0.0172379855012692	0.000257881150037001	0.00339688182765439
ENSG00000120254	MTHFD1L	0.0243269208557807	0.000257743131365866	0.00339688182765439
ENSG00000154269	ENPP3	-0.035723938669648	0.000257902473666131	0.00339688182765439
ENSG00000139914	FITM1	0.0238975856523241	0.00025865502732387	0.00340474156750234
ENSG00000127540	UQCR11	0.0224990205686193	0.000259483197841582	0.00341358660808935
ENSG00000198833	UBE2J1	0.0228281830619674	0.000261094044636722	0.00343271117289832
ENSG00000168268	NT5DC2	0.0286247841591632	0.000261300853129229	0.00343336436664268
ENSG00000102543	CDADC1	0.0214929930224455	0.000262049228170717	0.00344112841632112
ENSG00000171596	NMUR1	-0.0309934826671567	0.000262401199953847	0.00344368085296788
ENSG00000197061	HIST1H4C	0.0354628497447223	0.000262896391400491	0.00344810867256431
ENSG00000119714	GPR68	-0.020039058637814	0.000263936230514086	0.00345967040969604
ENSG00000256206	PSMA1	0.0132606113255898	0.000264100716383991	0.00345975105138284
ENSG00000211949	IGHV3-23	0.0356650178188754	0.000264928432414962	0.00346851478532015
ENSG00000133216	EPHB2	0.034837888394116	0.000265600036299717	0.00347522538514078
ENSG00000233461	RP11-295G20.2	0.0296281406698976	0.000266229164123576	0.00348137251063092
ENSG00000131016	AKAP12	-0.0355581305857784	0.000267526575242036	0.00349415612409667
ENSG00000204438	GPANK1	0.0125460259025153	0.000267521805031116	0.00349415612409667
ENSG00000019102	VSIG2	-0.030836828833295	0.000268895011973719	0.00350993124649804
ENSG00000160803	UBQLN4	-0.0165207980747011	0.000269769012038233	0.00351890914445563
ENSG00000173171	MTX1	0.0213338438382815	0.000269904888842965	0.00351890914445563
ENSG00000105379	ETFB	0.0141730888350504	0.000270103158137856	0.00351939422091251
ENSG00000065485	PDIA5	0.0199866865285185	0.000270660095019516	0.00352454930647881
ENSG00000184292	TACSTD2	0.0351139994391813	0.000271788199973387	0.00353713160072572
ENSG00000112335	SNX3	0.0164849110790098	0.000272143068545587	0.00353964178023191
ENSG00000180758	GPR157	-0.0242267027356893	0.00027264263347697	0.00354402985372116
ENSG00000228906	RP13-216E22.4	0.0315695042281135	0.000273179612399178	0.00354889875774937
ENSG00000223401	RP11-211G3.2	0.0328812512911355	0.000274526508880578	0.00356427732950061
ENSG00000139160	METTL20	0.0231414536380644	0.000275494101306317	0.0035747159190287
ENSG00000100425	BRD1	-0.0198769721097423	0.000276087312924175	0.00358028716599771
ENSG00000269430	LRRC3DN	0.0288130324269553	0.00027645737478682	0.00358295972506927
ENSG00000182481	KPNA2	0.0207246621790674	0.000276730071124281	0.00358436798111242
ENSG00000239306	RBM14	-0.0131219236111803	0.00027779679093019	0.00359605312714193
ENSG00000211630	IGKV1D-13	0.0259888920303219	0.000278110032929924	0.00359797651246404
ENSG00000070501	POLB	0.0237003421271771	0.000279324090757649	0.00361154479712745
ENSG00000178573	MAF	-0.0225343118947753	0.000280190813856505	0.00362060879572944
ENSG00000174282	ZBTB4	-0.017066730344168	0.000280405109019781	0.00362123642860003
ENSG00000183087	GAS6	0.0276568647541522	0.000280725046267739	0.00362322680803093
ENSG00000100749	VRK1	0.025682100437649	0.00028179458191487	0.00363273947458514
ENSG00000186994	KANK3	-0.0259669859240034	0.00028165712940257	0.00363273947458514
ENSG00000142185	TRPM2	0.0256834726547776	0.000283493508063245	0.0036503339096582
ENSG00000166454	ATMIN	-0.0124777177487562	0.000283437604818283	0.0036503339096582
ENSG00000104472	CHRAC1	-0.0120607402453314	0.000284360751397256	0.0036593014508517
ENSG00000164430	MB21D1	0.0199824065878845	0.00028452488055453	0.0036593014508517
ENSG00000176986	SEC24C	-0.0120396355338372	0.00028490017280253	0.00366197275053417
ENSG00000257764	RP11-1143G9.4	0.0282935917352148	0.000285789432601802	0.00367124332262315
ENSG00000122741	DCAF10	0.0168457606036256	0.000286543905201764	0.00367708270096331
ENSG00000235027	AC068580.6	0.02457410330805	0.000286580561060845	0.00367708270096331
ENSG00000248527	RP5-857K21.10	0.0354378598423774	0.000287682027443304	0.00368904928501387
ENSG00000254709	IGLL5	0.0354332255450207	0.000290223811387543	0.00371946070535437
ENSG00000078589	P2RY10	-0.0231705173009449	0.000291062478122207	0.0037280223970975
ENSG00000066827	ZFAT	-0.032319932630642	0.000292250859357363	0.00374105068999282
ENSG00000174437	ATP2A2	-0.0121802739182409	0.000294625017903094	0.00376923376241247
ENSG00000103642	LACTB	0.0193663188158187	0.000295211951889232	0.00377453268620925
ENSG00000205302	SNX2	0.0200013390613842	0.000296190386850445	0.00378482815384157
ENSG00000107959	PITRM1	-0.0159798251182059	0.000297656932862318	0.00380134520162157
ENSG00000117298	ECE1	0.0257757806517569	0.000298107792154459	0.00380487930278452
ENSG00000100422	CERK	-0.0120431341831607	0.000298521182595953	0.00380793132568837
ENSG00000165490	C11orf82	0.0267541111494173	0.000299664433767247	0.00382028444705258
ENSG00000129084	PSMA1	0.0126704794515723	0.000300344695291998	0.00382672416141425
ENSG00000107485	GATA3	-0.0225397982213012	0.000300719217692392	0.00382926318519607
ENSG00000047056	WDR37	-0.0104269108035887	0.000300962604415487	0.0038301303838572
ENSG00000175602	CCDC85B	0.0207338760400789	0.000301513607264361	0.00383490909914642
ENSG00000168827	GFM1	-0.0149278685152341	0.000303512227830758	0.00385808358948801
ENSG00000006114	SYNRG	-0.0116808579643429	0.000304955754189011	0.00387417917720004
ENSG00000113811	SELK	0.0239236825586029	0.000305569017879985	0.00387521103290513
ENSG00000158104	HPD	0.03376317661669	0.000305427149545027	0.00387521103290513
ENSG00000163993	S100P	0.0347666503991037	0.000305231028514518	0.00387521103290513
ENSG00000079819	EPB41L2	-0.0228938388614093	0.000305986007122957	0.00387600014008332
ENSG00000259357	RP11-316M1.12	-0.0142046733878096	0.000305914074613878	0.00387600014008332
ENSG00000182487	NCF1B	0.0274751531723784	0.00030846333384833	0.00390336675539517
ENSG00000264235	RP13-270P17.1	0.0226683392501711	0.000308503701732985	0.00390336675539517
ENSG00000143198	MGST3	0.0191485048341848	0.000308685896711782	0.00390341176449604
ENSG00000168894	RNF181	0.0146082999152808	0.0003091036642217	0.00390643387328419
ENSG00000117834	SLC5A9	0.033518368064622	0.00031228403060949	0.00394434586869824
ENSG00000209082	J01415.1	-0.0311910650625704	0.000312913234006403	0.00395000986497626
ENSG00000264769	RP11-498C9.12	0.0304073502200249	0.00031431991989594	0.0039654760794724
ENSG00000143603	KCNN3	0.0341887508891944	0.000315657859658275	0.00398005764073455
ENSG00000258539	RP11-12J10.3	-0.0186661427702976	0.000315989160757608	0.00398193722705565
ENSG00000156411	C14orf2	0.0268148401737982	0.000320117182642751	0.00403163144549092
ENSG00000169255	B3GALNT1	0.0340228374236687	0.000320763578215202	0.00403744524630206
ENSG00000112796	ENPP5	-0.0309089310121805	0.000321185628118586	0.00404043014393738
ENSG00000125845	BMP2	0.0349540054046872	0.000321943882927669	0.00404763854191743
ENSG00000188001	TPRG1	-0.0305902943923591	0.000323275738193437	0.00406204609273421
ENSG00000224650	IGHV3-74	0.035064230563809	0.000323699926450027	0.00406503855911468
ENSG00000062485	CS	-0.0153650568757156	0.000325239825958471	0.00408203069329038
ENSG00000147394	ZNF185	-0.0283138651545016	0.00032642331683299	0.00409453266137639
ENSG00000113312	TTC1	0.0121024276821081	0.000327143971567257	0.00410121797057724
ENSG00000103275	UBE2I	-0.00847378795703182	0.000327794633628936	0.00410466506557357
ENSG00000214796	RP11-480I12.5	0.0267038506026412	0.00032764992861943	0.00410466506557357
ENSG00000251692	PTX4	-0.034645459001709	0.000328130148575406	0.00410651310224582
ENSG00000226608	FTLP3	0.0188575106218087	0.000328486135363423	0.00410861507946546
ENSG00000100219	XBP1	0.0205429768642716	0.000328751748348977	0.00410958492744479
ENSG00000181019	NQO1	0.023989025780748	0.000329849888834757	0.00412095478612251
ENSG00000224067	RP11-430K21.2	0.032479555266112	0.000331358633933204	0.00413743857718539
ENSG00000255275	RP13-279N23.2	-0.019619685714907	0.000332876541013027	0.00415401787417228
ENSG00000160191	PDE9A	0.0331250361896924	0.000333299126668996	0.00415691736121246
ENSG00000144233	AMMECR1L	-0.0123343278794573	0.000334866591455951	0.00417408436389275
ENSG00000175592	FOSL1	0.0330152027797565	0.00033681051947982	0.00419592169963144
ENSG00000229320	KRT8P12	0.0197947769772892	0.000337140822283054	0.00419764336621482
ENSG00000183784	C9orf66	0.0265945353714715	0.000337532728310767	0.00420012963913359
ENSG00000261884	CTC-479C5.12	0.017297182680308	0.000338836271481796	0.00421395069331173
ENSG00000110852	CLEC2B	0.0308182457951251	0.000339979685145158	0.00422336333149906
ENSG00000185262	FAM100B	0.0233470548623388	0.000339861872717379	0.00422336333149906
ENSG00000052126	PLEKHA5	-0.0302400067332604	0.000341353793612829	0.00423774019646653
ENSG00000111639	MRPL51	0.021833556126501	0.000341524895244042	0.00423774019646653
ENSG00000072803	FBXW11	-0.0137679295303058	0.000341963468460841	0.0042407739780578
ENSG00000089177	KIF16B	-0.0242848720911291	0.000342408947954481	0.00424388991591229
ENSG00000240368	AP000304.2	-0.0222862543562355	0.000344186224379863	0.00426349954020656
ENSG00000136874	STX17	0.0190294325513463	0.000344541910765797	0.004265487417645
ENSG00000102900	NUP93	-0.0175554581757016	0.000346787225127883	0.00429085371249682
ENSG00000225377	RP5-1103G7.4	0.0336851104201867	0.000347330872341838	0.00429514821253057
ENSG00000234076	TPRG1-AS1	0.0349548067163731	0.000348912611468671	0.0043122678015848
ENSG00000224611	AC007919.18	0.0347407015146837	0.000350207474749954	0.00432582449449477
ENSG00000168778	TCTN2	-0.0267369774741203	0.000352588002438608	0.00435276861089606
ENSG00000142627	EPHA2	-0.0345451156749676	0.000357182443111853	0.0044069980601
ENSG00000099194	SCD	0.0283888162501577	0.000359014076956693	0.00442496961361025
ENSG00000160219	GAB3	-0.0164621448578995	0.000359222458775888	0.00442496961361025
ENSG00000266208	CTD-2267D19.3	0.0274272421522431	0.000359246537666221	0.00442496961361025
ENSG00000066135	KDM4A	-0.0147030994668073	0.000361070047617716	0.00444178764625407
ENSG00000143079	CTTNBP2NL	-0.02733166517663	0.000361221758610292	0.00444178764625407
ENSG00000201808	SNORA73A	0.034130538790241	0.000361108025373027	0.00444178764625407
ENSG00000213949	ITGA1	0.0282606472331971	0.00036362283842383	0.00446879788661368
ENSG00000142684	ZNF593	0.0207592899643023	0.000364361261071731	0.00447535577047689
ENSG00000256261	AC104698.1	-0.019810037143948	0.000365186548478605	0.00448297262404832
ENSG00000164086	DUSP7	-0.0146036740014145	0.000366758558000485	0.00449974242047648
ENSG00000226677	IGBP1P1	0.0328898556487915	0.000367291610569392	0.00450375363779562
ENSG00000109046	WSB1	0.0232536289036689	0.000369100077539234	0.00452328899756968
ENSG00000237493	RP11-603J24.7	0.0282780756595937	0.000369298776791191	0.00452328899756968
ENSG00000196550	FAM72A	0.0333905343359074	0.000371302717198502	0.00454528609159915
ENSG00000135046	ANXA1	0.0306696641274192	0.000373897590261021	0.00457448837894377
ENSG00000183160	TMEM119	0.0336063835428191	0.000374657387076677	0.00458121911864156
ENSG00000127526	SLC35E1	-0.0129560672495288	0.00037567964330174	0.00459114982426528
ENSG00000111962	UST	-0.0242235927397511	0.000377045851366275	0.00460527048530155
ENSG00000214212	C19orf38	0.0209898958080004	0.000377700009377909	0.00461068318710429
ENSG00000141627	DYM	-0.0121851239546236	0.000378034694236105	0.00461219212939873
ENSG00000211959	IGHV4-39	0.0345514214777181	0.000378904157207017	0.00462022027853266
ENSG00000239855	IGKV1-6	0.0331407948309725	0.000379629954665977	0.00462648864439837
ENSG00000143256	PFDN2	0.0208860678992767	0.000382494347341646	0.00465879820722536
ENSG00000179271	GADD45GIP1	0.0220121250236927	0.000384621480183754	0.00468209691559622
ENSG00000174579	MSL2	-0.0162311784623546	0.000385521597950391	0.00469011489815259
ENSG00000174738	NR1D2	-0.0247486095983455	0.000385778442035001	0.00469011489815259
ENSG00000260361	CTD-2313J17.5	0.0294161811173415	0.000385924057794991	0.00469011489815259
ENSG00000180535	BHLHA15	0.0333508301274743	0.000387143885503743	0.00470232409235258
ENSG00000189376	C8orf76	0.0129880661030344	0.000389764656496178	0.00473152639394333
ENSG00000238881	SCARNA2	0.023055522485198	0.000391621548616437	0.00475142835025973
ENSG00000228830	RP4-781K5.2	-0.014250663689348	0.000391952336839174	0.00475280272601154
ENSG00000026103	FAS	0.0269382884691434	0.000394185818271585	0.0047772347837229
ENSG00000269590	CTD-2192J16.24	-0.0165433385735339	0.000394965186534759	0.00478402676883094
ENSG00000171476	HOPX	-0.0283468529535655	0.000396411172176313	0.00479888117630172
ENSG00000099795	NDUFB7	0.0179775985931125	0.000398915064530149	0.00482651886769008
ENSG00000241721	SUMO1P1	0.0343870824505357	0.000399526272265179	0.00483123883523322
ENSG00000178803	ADORA2A-AS1	0.0215387094229212	0.000401898603832029	0.00485455300847632
ENSG00000198959	TGM2	0.0302489951766391	0.000401832036238231	0.00485455300847632
ENSG00000134954	ETS1	-0.0206586219666637	0.000403255327657636	0.0048682498147221
ENSG00000139890	REM2	0.028671922096524	0.000404266619739814	0.00487776361564588
ENSG00000106991	ENG	-0.0223742030213332	0.00040451844225253	0.00487810843358721
ENSG00000143842	SOX13	-0.0270268542865479	0.000406698376416034	0.00489898909761122
ENSG00000187994	RINL	0.0144930164249814	0.000406570180188839	0.00489898909761122
ENSG00000144824	PHLDB2	-0.0291032914115071	0.000409199404247438	0.00492373975798618
ENSG00000198920	KIAA0753	-0.014770987160605	0.000409203761864578	0.00492373975798618
ENSG00000124459	ZNF45	-0.0157022634065282	0.000409864636659183	0.0049289775319977
ENSG00000100221	JOSD1	-0.0113206954332902	0.000410761702716074	0.00493704838616553
ENSG00000149357	LAMTOR1	0.0144465872146923	0.000411533896278053	0.00494361031752157
ENSG00000123473	STIL	0.0294494573210398	0.000412537293177728	0.0049529408753992
ENSG00000178965	C1orf173	0.0311112524966072	0.00041307467896034	0.00495666930805183
ENSG00000126821	SGPP1	-0.0237985932829068	0.000415201230734421	0.0049794523011953
ENSG00000168874	ATOH8	-0.0345279294200284	0.000415470360357161	0.00497994670552075
ENSG00000012211	PRICKLE3	0.0178919263109118	0.000416461119353222	0.00498746346584932
ENSG00000100479	POLE2	0.0319631277789258	0.000416553971222141	0.00498746346584932
ENSG00000160818	GPATCH4	0.0173213388579289	0.00041714020422451	0.00498901510810606
ENSG00000165629	ATP5C1	0.0276429638582377	0.000417119555005149	0.00498901510810606
ENSG00000135597	REPS1	-0.0133333335123838	0.000418365031827043	0.00499546137183208
ENSG00000140939	NOL3	0.0249706222440303	0.000418227771006623	0.00499546137183208
ENSG00000258674	YJEFN3	0.015218835958884	0.000418053176964137	0.00499546137183208
ENSG00000164342	TLR3	0.0319095157742181	0.000418963050129193	0.00499986980249754
ENSG00000153832	FBXO36	-0.0312646832825291	0.000419401965319346	0.00500237573372982
ENSG00000226004	RP11-10J5.1	0.0264169242088838	0.000420316440390292	0.00501054802998815
ENSG00000253669	KB-1732A1.1	0.0320301098556026	0.000421395926034262	0.00502067741536241
ENSG00000107164	FUBP3	-0.0131855400790903	0.00042430352332406	0.00505256473468885
ENSG00000109016	DHRS7B	0.017109488315407	0.000425425957129161	0.00506317134489614
ENSG00000241525	AC108004.3	0.0320046815437621	0.000426503564086975	0.00507323319480919
ENSG00000107554	DNMBP	-0.0238261778761407	0.000427857054571418	0.00508656392787816
ENSG00000122986	HVCN1	-0.0194780398762327	0.000433782863915803	0.00515420846080708
ENSG00000139187	KLRG1	-0.0288162994095118	0.000434235067487045	0.00515677742372795
ENSG00000259305	ZHX1-C8ORF76	0.0144014036176213	0.000437229687977239	0.00518951977837623
ENSG00000104738	MCM4	0.0271173436326046	0.000437661263976944	0.00519182208423464
ENSG00000159403	C1R	0.0229990004294652	0.000438316493970022	0.0051967735809761
ENSG00000004799	PDK4	-0.0316840139421479	0.000438943642379149	0.00519811096253309
ENSG00000116031	CD207	-0.0326803200900455	0.000438846319304423	0.00519811096253309
ENSG00000157483	MYO1E	-0.028260401532859	0.00043914296081809	0.00519811096253309
ENSG00000182117	NOP10	0.0215712228840721	0.000439449465361654	0.00519892272204521
ENSG00000124562	SNRPC	0.0149764788671904	0.000440863967886324	0.00521283471985069
ENSG00000124209	RAB22A	-0.0127103542169642	0.000441370158858558	0.00521599748037769
ENSG00000136682	CBWD2	0.0223175484198954	0.000443598649178212	0.00523666887260567
ENSG00000206561	COLQ	-0.0259858293100414	0.000443524653310812	0.00523666887260567
ENSG00000007402	CACNA2D2	-0.0270310913143799	0.000446135884027096	0.00526172081189718
ENSG00000163541	SUCLG1	0.0132148697315219	0.0004462024010089	0.00526172081189718
ENSG00000121900	TMEM54	0.0317381230811537	0.000446810253787313	0.00526320800835934
ENSG00000165795	NDRG2	-0.0222912220023128	0.000446746881146835	0.00526320800835934
ENSG00000066468	FGFR2	-0.0343451337546118	0.00044795722926603	0.00527387576330389
ENSG00000022267	FHL1	-0.0247182407473185	0.000450086009414505	0.00529608475590541
ENSG00000072954	TMEM38A	0.0235824447296929	0.000451556412614298	0.00531052700324813
ENSG00000162399	BSND	0.0323036820944817	0.000453503199866468	0.00532768732273236
ENSG00000211450	C11orf31	0.0192434610863585	0.000453365349312624	0.00532768732273236
ENSG00000139180	NDUFA9	0.0161284221388313	0.000454659847066907	0.00533840532953197
ENSG00000258653	RP5-1021I20.4	0.010916452202879	0.000455056614382032	0.00534019445803532
ENSG00000092020	PPP2R3C	0.0205035622653886	0.000455665514926385	0.00534446976202708
ENSG00000187555	USP7	-0.0124096708775164	0.000456764820401339	0.00535448931898587
ENSG00000211652	IGLV7-43	0.0339700263620022	0.000457288083178736	0.00535774901101263
ENSG00000129195	FAM64A	0.034233303863535	0.000460717747619846	0.00539188260913544
ENSG00000147687	TATDN1	0.0182358792806054	0.000460941682937394	0.00539188260913544
ENSG00000162069	CCDC64B	0.0338944770165996	0.000460762432458678	0.00539188260913544
ENSG00000172428	MYEOV2	0.0215225967926757	0.000462853954001256	0.00541135460079264
ENSG00000117868	ESYT2	-0.0145107381723705	0.000463355314105477	0.00541431923450202
ENSG00000111252	SH2B3	-0.0169499237841149	0.000464107187513435	0.00541731097989106
ENSG00000171530	TBCA	0.0212770849678736	0.000463951128447233	0.00541731097989106
ENSG00000116711	PLA2G4A	0.0263967350044427	0.000464669886507439	0.00542098328354194
ENSG00000225556	C2CD4D	-0.0322128650913486	0.000466408698581243	0.00543836524690434
ENSG00000241627	UBQLN4P1	-0.0214210800382602	0.000468749445441555	0.00546274353724982
ENSG00000099219	ERMP1	-0.0177565986708458	0.000470415535656933	0.0054792376703836
ENSG00000125945	ZNF436	-0.0155366701896721	0.000472626044764266	0.00549749092697462
ENSG00000225864	HCG4P11	0.0186879205311538	0.000472711636686724	0.00549749092697462
ENSG00000253971	CDC42P3	0.0276037890572713	0.00047273742399823	0.00549749092697462
ENSG00000135953	MFSD9	0.0246601752974892	0.000477073211954989	0.00554496103958961
ENSG00000227603	RP11-165J3.6	0.0280556158581791	0.000477463108496935	0.0055465424687754
ENSG00000128951	DUT	0.019167166748229	0.000479327909102135	0.00556524662156789
ENSG00000106723	SPIN1	-0.0161740583073188	0.000481109100224354	0.00558296067392585
ENSG00000264501	Metazoa_SRP	0.0333731477963954	0.000482239172773232	0.0055931041211613
ENSG00000173660	UQCRH	0.0265531787282518	0.000483589655727294	0.00560579181288971
ENSG00000087088	BAX	0.0140035294482077	0.00048522907101868	0.00562181359004728
ENSG00000101849	TBL1X	-0.0235817449932183	0.000488786636917206	0.00565731672951843
ENSG00000123352	SPATS2	0.022230976858777	0.000489232929240796	0.00565731672951843
ENSG00000154719	MRPL39	0.0257697849320117	0.000488939421936433	0.00565731672951843
ENSG00000167037	SGSM1	-0.0284771483764099	0.000489329029279659	0.00565731672951843
ENSG00000179958	DCTPP1	0.0178160297507748	0.000491983502012275	0.00568499815043375
ENSG00000156030	ELMSAN1	-0.0159122639741724	0.000493758242522016	0.00570249014659015
ENSG00000180316	PNPLA1	0.0294031101680183	0.000495375638102579	0.00571814742111962
ENSG00000188486	H2AFX	0.0206071926455847	0.000497478954934059	0.00573939421555656
ENSG00000090382	LYZ	0.026910777052602	0.000500924876810732	0.00577136323260432
ENSG00000092847	EIF2C1	-0.014264779636764	0.000500631223065371	0.00577136323260432
ENSG00000238113	RP11-262H14.1	0.0281991736718666	0.000501042334549924	0.00577136323260432
ENSG00000167257	RNF214	-0.0138561809378519	0.000502004007999747	0.00577635048910083
ENSG00000225921	NOL7	0.011731404261838	0.000501966660733677	0.00577635048910083
ENSG00000103343	ZNF174	-0.0138082342843286	0.00050461779273637	0.00580337020478022
ENSG00000144034	TPRKB	0.0241769645659818	0.000505748916625821	0.00581331908321453
ENSG00000135069	PSAT1	0.0266781675168212	0.000506486417578295	0.00581873538932878
ENSG00000257103	LSM14A	-0.0113738435116459	0.000507407451380111	0.00582319339291324
ENSG00000267632	RP11-400F19.18	0.0276296542644727	0.000507293083688429	0.00582319339291324
ENSG00000146733	PSPH	0.0209145060344613	0.000508663214434915	0.00583454062919545
ENSG00000130755	GMFG	0.0217579389668568	0.000509490231132779	0.00583971425565938
ENSG00000250507	AC008984.6	-0.0294610076494557	0.000509648761408743	0.00583971425565938
ENSG00000149257	SERPINH1	-0.0199387773942084	0.000514628713169751	0.00589368554060389
ENSG00000140968	IRF8	-0.0189728436849975	0.000514899086535912	0.00589369300151713
ENSG00000101350	KIF3B	-0.0121577434416132	0.000515294711182554	0.00589513336861256
ENSG00000237927	RP3-393E18.2	0.0323210041329278	0.000515790274529104	0.00589771496009181
ENSG00000137124	ALDH1B1	-0.019205946856245	0.00051684125149397	0.00590046927188858
ENSG00000142675	CNKSR1	0.0279645123080278	0.000516605006352343	0.00590046927188858
ENSG00000147889	CDKN2A	0.0268930941156876	0.000516356933460014	0.00590046927188858
ENSG00000267881	CEA	0.0280947684835256	0.000518113121201849	0.00591190068479457
ENSG00000132464	ENAM	0.0338662934589868	0.000519034023628731	0.00591754369022388
ENSG00000140307	GTF2A2	0.014538318443371	0.000519149295417106	0.00591754369022388
ENSG00000004779	NDUFAB1	0.0172816517441692	0.000519854879840217	0.00592249686099509
ENSG00000137075	RNF38	-0.0141110100632643	0.000521446701054174	0.00593753614629221
ENSG00000006625	GGCT	0.0164076838264251	0.00052284783317567	0.00595038958475081
ENSG00000256812	CAPNS2	0.0338924943402779	0.00052359782717608	0.00595582307216269
ENSG00000104903	LYL1	0.018827420369039	0.000524282536466715	0.0059605086911208
ENSG00000211696	TRGV8	-0.0333229840485353	0.000526576311214736	0.00598347320663192
ENSG00000237568	RP4-620F22.2	0.0325727361731143	0.00053086690854944	0.00602909190161841
ENSG00000182628	SKA2	0.0219033584420002	0.000531587618273635	0.00603414080358297
ENSG00000143418	CERS2	-0.0124496121167804	0.000535817794085416	0.00607900032116325
ENSG00000236567	RP11-39K24.7	0.0334918500282642	0.000540487567654856	0.00612879804920926
ENSG00000101544	ADNP2	-0.0145343527158174	0.000545506174234333	0.00618249762095146
ENSG00000204267	TAP2	0.0236425714677327	0.000545894212397377	0.00618368814675743
ENSG00000243678	NME1-NME2	0.0195155443220438	0.000547334569320065	0.00619679154104287
ENSG00000268059	AL441883.1	0.0133520412682458	0.00054783203927791	0.00619921175052388
ENSG00000166710	B2M	0.0274470604825201	0.000550242673536861	0.00622326742207761
ENSG00000140839	CLEC18B	0.0329589009307614	0.000554170790834393	0.0062581141601077
ENSG00000165233	C9orf89	0.0171207439891993	0.000554137355453078	0.0062581141601077
ENSG00000250318	CTA-963H5.5	0.0260221806092069	0.000554182916104911	0.0062581141601077
ENSG00000132341	RAN	0.0157407950006541	0.000555003799444067	0.00625996367236021
ENSG00000171115	GIMAP8	-0.0189651112268068	0.000555206150612516	0.00625996367236021
ENSG00000181817	LSM10	0.0134721414551931	0.000554726229777756	0.00625996367236021
ENSG00000070915	SLC12A3	-0.0323379372245508	0.000555503786457217	0.00626008934392813
ENSG00000139574	NPFF	0.017860049387712	0.000560126217643683	0.00630892679470728
ENSG00000047579	DTNBP1	0.0155730028518874	0.000561488436414168	0.00632101175893147
ENSG00000151470	C4orf33	0.0229687603383016	0.00056385503697075	0.00634438538251692
ENSG00000144749	LRIG1	-0.0200930152181724	0.000566426095514667	0.00636348411984112
ENSG00000175110	MRPS22	0.0215963534231943	0.0005659760953944	0.00636348411984112
ENSG00000229809	ZNF688	0.0150937388064015	0.000566352427499092	0.00636348411984112
ENSG00000125611	CHCHD5	0.0151357630543726	0.000571171420510007	0.00641349779525393
ENSG00000175324	LSM1	0.0260753459586721	0.00057218621238079	0.0064215926690974
ENSG00000099995	SF3A1	-0.0201416238774609	0.000575474254082331	0.00645517860675206
ENSG00000152642	GPD1L	-0.0164732114736106	0.000575796347643265	0.00645547767693842
ENSG00000089248	ERP29	0.0106138583567226	0.000576722298478535	0.00646254304823306
ENSG00000144655	CSRNP1	0.0272566652494202	0.00057739947269633	0.00646307208998048
ENSG00000197506	SLC28A3	0.0336453045726331	0.000577099915443536	0.00646307208998048
ENSG00000236782	RP11-96L14.7	0.0212806263648062	0.000577656848278426	0.00646307208998048
ENSG00000100014	SPECC1L	-0.0130955956242287	0.00057995342719866	0.00648544643690784
ENSG00000166833	NAV2	0.0335160542108373	0.000583960348234717	0.00652691435768634
ENSG00000173706	HEG1	-0.0205347630409262	0.000586320140731061	0.00654993936355543
ENSG00000107679	PLEKHA1	-0.0223447216406688	0.000589705650757675	0.00658294279385622
ENSG00000173163	COMMD1	0.0169760482513862	0.000589876984594319	0.00658294279385622
ENSG00000267767	CTC-523E23.4	-0.0290561195400684	0.000591497018736017	0.00659765255558995
ENSG00000117036	ETV3	-0.0127336018611514	0.000592491221369807	0.00660125451802777
ENSG00000135018	UBQLN1	-0.0113070810193442	0.000592716164134065	0.00660125451802777
ENSG00000198246	SLC29A3	-0.0178146871570187	0.000592726253460733	0.00660125451802777
ENSG00000146674	IGFBP3	-0.0295494041277811	0.000593675244039612	0.0066084553018388
ENSG00000230409	TCEA1P2	-0.0164983639534915	0.00059407833880159	0.00660957524498653
ENSG00000227051	C14orf132	-0.0334125490204772	0.000594448489280355	0.00661032770446057
ENSG00000261471	RP11-61F12.1	0.0273347187162509	0.000595794874883427	0.00662192971061942
ENSG00000119638	NEK9	-0.00833168318524385	0.000596754360535345	0.00662585342076109
ENSG00000147065	MSN	-0.0226500537490406	0.000596539235013304	0.00662585342076109
ENSG00000137672	TRPC6	-0.0331035051644103	0.000599257663455681	0.00665026876798887
ENSG00000135900	MRPL44	0.0152874348774089	0.000600685781855321	0.00666273351234549
ENSG00000157933	SKI	-0.0221841657335214	0.000601468333738055	0.00666802869635223
ENSG00000112077	RHAG	0.0318024652134184	0.000603200507014639	0.00668384091215866
ENSG00000118513	MYB	0.0279238641328656	0.00060529598196852	0.00670366067004264
ENSG00000136811	ODF2	-0.0135116856337514	0.00060771634027088	0.00672705661158004
ENSG00000213865	C8orf44	0.0181020957402832	0.0006091611413597	0.00673963549359534
ENSG00000256269	HMBS	0.0232160947019474	0.00061112456859096	0.00675793671471714
ENSG00000070081	NUCB2	0.0250996385388489	0.0006151595279097	0.00679911524752395
ENSG00000213551	DNAJC9	0.0152298115081131	0.000617400696407944	0.00682043610576845
ENSG00000204842	ATXN2	-0.0112728638415129	0.000618171168775622	0.0068254968210794
ENSG00000079257	LXN	0.0258330443277221	0.000618836792002604	0.00682939532426712
ENSG00000196668	LINC00173	0.0250230566532679	0.000619460818598304	0.00682986990944139
ENSG00000255432	RP11-831H9.11	0.0156720635837991	0.000619504927029098	0.00682986990944139
ENSG00000248923	MTND5P11	-0.0307268129750779	0.000622203756930674	0.0068561645449784
ENSG00000100883	SRP54	0.0123115535884151	0.000623393741551506	0.00686581484205744
ENSG00000249014	HMGN2P4	0.0306213047755951	0.000625279584445849	0.00688311546585705
ENSG00000211976	IGHV3-73	0.0325365604766428	0.000628826517837044	0.00691867484454041
ENSG00000049768	FOXP3	0.0266431086902697	0.000630124091122954	0.00692946226226858
ENSG00000116898	MRPS15	0.014386962734085	0.000631935720193985	0.00694588904525089
ENSG00000104915	STX10	0.0186455918093321	0.000634028213325964	0.00696188466803298
ENSG00000167985	SDHAF2	0.00896773615473796	0.000634012935074227	0.00696188466803298
ENSG00000144040	SFXN5	0.0192378982019842	0.000635533536341875	0.00697490874063602
ENSG00000139613	SMARCC2	-0.0146550178343813	0.000636302047217268	0.00697983736633761
ENSG00000087586	AURKA	0.0279345650470729	0.000641755153428032	0.00703612235702757
ENSG00000258527	ASB9P1	0.0327262390163431	0.000643215063577574	0.00704859195297571
ENSG00000166860	ZBTB39	-0.0159745705688682	0.000646239086542407	0.00707818059149781
ENSG00000159713	TPPP3	-0.030781207868975	0.000646797549280405	0.00708074812090488
ENSG00000185168	LINC00482	0.02941710687518	0.000648368559947875	0.00709439229014573
ENSG00000115233	PSMD14	0.0206349548634668	0.000652185653921476	0.00713258694886795
[truncated: 1,692 more rows]
